# Supplementary material
Source: publisher figshare collection journal article supplement (https://gsajournals.figshare.com/ndownloader/files/25930344)
Supplement: Supplementary file 1 [file 25930344]

## Sheet: 7A_Para_Non_Para_DEGs
PMZ_ID	gene_name	location	start	end	baseMean	log2FoldChange	lfcSE	stat	pvalue	padj	Smith_gene_name	Trinotate.Gene_name	DESC_smith	Ontology_term_smith	gene_ontology_blast
PMZ_0005435	MRPL43	scaf_00015	6079934	6082919	480.462	5.25411	0.617773	8.50491	1.82e-17	3.05e-13	MRPL43	RM43	desc=39S ribosomal protein L43%2C mitochondrial (Bos taurus)		GO:0005739
PMZ_0043034	CKM	scaf_00025	6802561	6810735	240.976	5.31992	0.785591	6.77186	1.27e-11	1.07e-07	CKM	KCRM	desc=Creatine kinase M-type (Canis familiaris)	GO:0003824,GO:0016301,GO:0016772	GO:0005829
PMZ_0046371	MRPL46	scaf_00124	350513	351925	482.048	-4.00371	0.731288	-5.47488	4.38e-08	0.000244577	MRPL46		desc=39S ribosomal protein L46%2C mitochondrial (Homo sapiens)
PMZ_0046247	FABP2	scaf_00108	323151	329498	119.918	6.19776	1.15476	5.36715	8e-08	0.000335146		FABP2	Note=Similar to Fatty acid-binding protein 2%2C liver (Ambystoma mexicanum)
PMZ_0037188	MYL6	scaf_00053	4419845	4436353	50.9074	8.55177	1.62597	5.2595	1.44e-07	0.00034583	MYL6	MYL6	desc=Myosin light polypeptide 6 (Bos taurus)		GO:0016459
PMZ_0038819	Samd5	scaf_00054	4024212	4047796	89.5012	5.14491	0.973361	5.28571	1.25e-07	0.00034583	Samd5		desc=Sterile alpha motif domain-containing protein 5 (Mus musculus)	GO:0005515
PMZ_0042620	LGALS3	scaf_00029	7910816	7914809	2475.82	-5.04678	0.958278	-5.26651	1.39e-07	0.00034583	LGALS3	LEC1	desc=Galectin-3 (Cricetulus longicaudatus)	GO:0030246	GO:0060102
PMZ_0003951	TRY1	scaf_00023	2056087	2059122	47.569	8.43605	1.61812	5.21348	1.85e-07	0.000348211		TRY1	Note=Similar to Trypsin (Xenopus laevis)	GO:0004252,GO:0006508	GO:0005615
PMZ_0041782	Dpp9	scaf_00013	14779824	14783104	861.367	2.29406	0.441825	5.19224	2.08e-07	0.000348211	Dpp9	DPP9	desc=Dipeptidyl peptidase 9 (Mus musculus)	GO:0006508,GO:0008236	GO:0005829
PMZ_0042646	PRLHR	scaf_00029	11402203	11417365	118	4.30414	0.826999	5.20453	1.94e-07	0.000348211	PRLHR	PRLHR	desc=Prolactin-releasing peptide receptor (Bos taurus)	GO:0004930,GO:0004950,GO:0004983,GO:0006935,GO:0007186,GO:0016021	GO:0016021
PMZ_0027715	Ermp1	scaf_00056	3690997	3714788	1093.39	-2.73984	0.53385	-5.13223	2.86e-07	0.000436231	Ermp1		desc=Endoplasmic reticulum metallopeptidase 1 (Rattus norvegicus)
PMZ_0028526	e2f7	scaf_00309	83463	93906	34.1941	4.21587	0.831488	5.07027	3.97e-07	0.000443848	e2f7	E2F7	desc=Transcription factor E2F7 (Danio rerio)	GO:0003700,GO:0005667,GO:0006355	GO:0005634
PMZ_0031124	PRAF2	scaf_00042	9408049	9409738	150.222	3.24707	0.64034	5.07086	3.96e-07	0.000443848	PRAF2	PRAF2	desc=PRA1 family protein 2 (Macaca fascicularis)		GO:0010008
PMZ_0040926	TNNT2	scaf_00002	17087233	17124249	106.905	3.97062	0.779716	5.09239	3.54e-07	0.000443848	TNNT2	TNNT2	desc=Troponin T%2C cardiac muscle (Bos taurus)	GO:0005861,GO:0006937	GO:0005861
PMZ_0042713		scaf_00037	5886429	5886941	2296.46	3.05229	0.598501	5.09989	3.4e-07	0.000443848
PMZ_0037381	tlcd2	scaf_02386	3555	12303	35.6039	5.7102	1.13174	5.04551	4.52e-07	0.000451665	tlcd2		desc=TLC domain-containing protein 2 (Danio rerio)
PMZ_0044633	RSU1	scaf_00039	850671	859877	2000.97	2.29568	0.455216	5.04305	4.58e-07	0.000451665	RSU1		desc=Ras suppressor protein 1 (Bos taurus)	GO:0005515
PMZ_0026660	GLB2	scaf_00011	8169574	8178849	216.275	7.81609	1.57423	4.96502	6.87e-07	0.000523283		GLB2	Note=Similar to Globin-2 (Petromyzon marinus)	GO:0005506,GO:0015671,GO:0019825,GO:0020037	GO:0020037
PMZ_0037442		scaf_01776	6449	23935	71.0196	-3.58512	0.721694	-4.96764	6.78e-07	0.000523283
PMZ_0041512	ATP6V1B2	scaf_00015	7917591	7936253	513.031	-3.74412	0.753292	-4.97035	6.68e-07	0.000523283	ATP6V1B2	VATB2	desc=V-type proton ATPase subunit B%2C brain isoform (Bos taurus)	GO:0005524,GO:0015991,GO:0015992,GO:0016820,GO:0033178,GO:0046034	GO:0005829
PMZ_0042714	Atp5j2	scaf_00037	5888879	5892679	369.485	4.44745	0.8951	4.96866	6.74e-07	0.000523283	Atp5j2	ATPK	desc=ATP synthase subunit f%2C mitochondrial (Mus musculus)		GO:0070062
PMZ_0043312	MYH3	scaf_00019	2364392	2428406	291.208	3.93271	0.788145	4.98982	6.04e-07	0.000523283	MYH3	MYH8/MYH13	desc=Myosin-3 (Gallus gallus)	GO:0003774,GO:0005524,GO:0016459	GO:0070062
PMZ_0022286	Ctrb1	scaf_00020	1045299	1047684	72.4335	7.08998	1.43554	4.9389	7.86e-07	0.000572451	Ctrb1	CTRB1	desc=Chymotrypsinogen B (Mus musculus)	GO:0004252,GO:0006508	GO:0005615
PMZ_0034169	MEP1B	scaf_00040	9759746	9784987	617.528	4.42015	0.910285	4.85579	1.2e-06	0.000837312	MEP1B	MEP1B	desc=Meprin A subunit beta (Homo sapiens)	GO:0004222,GO:0005515,GO:0006508,GO:0008237,GO:0008270,GO:0016020	GO:0005615
PMZ_0004983	TNNT2	scaf_00112	133655	152965	94.5599	5.81708	1.20426	4.83041	1.36e-06	0.00091336	TNNT2	TNNT2/TNNT3	desc=Troponin T%2C cardiac muscle (Bos taurus)	GO:0005861,GO:0006937	GO:0005861
PMZ_0001804	CTRB	scaf_00020	956353	990380	137.047	3.65457	0.764584	4.77981	1.75e-06	0.00113097		CTRB	Note=Similar to Chymotrypsin B (Gadus morhua)	GO:0004252,GO:0006508	GO:0005615
PMZ_0028855	SDC4	scaf_00011	7510891	7514999	1735.41	-2.69094	0.565837	-4.75568	1.98e-06	0.00122761	SDC4	SDC4	desc=Syndecan-4 (Sus scrofa)	GO:0016020	GO:0009986
PMZ_0030281	PTRH1	scaf_00034	3791064	3795133	481.821	3.06733	0.652097	4.70379	2.55e-06	0.00147579	PTRH1	PTH	desc=Probable peptidyl-tRNA hydrolase (Homo sapiens)	GO:0004045	GO:0005739
PMZ_0043572	FAM107B	scaf_00027	767024	773279	205.025	-3.0618	0.650059	-4.71003	2.48e-06	0.00147579	FAM107B		desc=Protein FAM107B (Bos taurus)
PMZ_0004411	Kpnb1	scaf_00004	24152134	24178264	6495.29	-2.48041	0.52909	-4.68806	2.76e-06	0.00150168	Kpnb1	IMB1	desc=Importin subunit beta-1 (Mus musculus)	GO:0005488,GO:0006886,GO:0006913,GO:0008536,GO:0008565	GO:0071782
PMZ_0029791	gjc1	scaf_00016	14432129	14439836	765.789	-8.70409	1.85723	-4.68661	2.78e-06	0.00150168	gjc1	CXG1	desc=Gap junction gamma-1 protein (Xenopus tropicalis)	GO:0005922,GO:0007154	GO:0005922
PMZ_0008105	SLC16A1	scaf_00027	485032	493860	2845.49	-4.94023	1.06447	-4.64101	3.47e-06	0.00163989	SLC16A1		desc=Monocarboxylate transporter 1 (Cricetulus longicaudatus)	GO:0005887,GO:0008028,GO:0015718,GO:0016021,GO:0055085,GO:1901475
PMZ_0012748	ST13	scaf_00011	9230328	9237846	145.6	-2.92837	0.631423	-4.63772	3.52e-06	0.00163989	ST13	F10A1	desc=Hsc70-interacting protein (Pongo abelii)		GO:0005737
PMZ_0026182	Ttn	scaf_00028	8495212	8660658	91.8576	4.26316	0.915109	4.65864	3.18e-06	0.00163989	Ttn	TITIN	desc=Titin (Mus musculus)	GO:0005515
PMZ_0029383	ACT2	scaf_00036	5578277	5585562	341.685	3.68209	0.791088	4.65447	3.25e-06	0.00163989		ACT2	Note=Similar to Actin%2C alpha cardiac muscle 2 (Xenopus tropicalis)		GO:0005737
PMZ_0043229	LIPM	scaf_00031	4506488	4506865	99.7643	-3.90588	0.841469	-4.64174	3.45e-06	0.00163989	LIPM	LIPM	desc=Lipase member M (Homo sapiens)	GO:0006629	GO:0005576
PMZ_0045737	FAM120A	scaf_00057	2659133	2661539	127.522	-2.8283	0.612556	-4.6172	3.89e-06	0.0017617	FAM120A	F120A	desc=Constitutive coactivator of PPAR-gamma-like protein 1 (Mus musculus)		GO:0005737
PMZ_0012996	TNNC2	scaf_00008	5912008	5917435	331.661	6.65157	1.44476	4.60394	4.15e-06	0.00180924		TNNC2	Note=Similar to Troponin C%2C skeletal muscle (Pelophylax esculentus)	GO:0005509	GO:0005509
PMZ_0045979	CST3	scaf_00069	2223868	2227436	2635.24	3.0142	0.655158	4.60072	4.21e-06	0.00180924	CST3	CYT	desc=Cystatin-C (Bos taurus)	GO:0004869	GO:0005576
PMZ_0013587	ITM2B	scaf_00001	21657317	21691119	2631.5	-2.33528	0.51089	-4.571	4.85e-06	0.00202745	ITM2B	ITM2C/ITM2B	desc=Integral membrane protein 2B (Gallus gallus)		GO:0010008
PMZ_0040117	MRPL22	scaf_00003	14005847	14012652	4023.82	2.75637	0.603611	4.56647	4.96e-06	0.00202745	MRPL22	RM22	desc=39S ribosomal protein L22%2C mitochondrial (Pongo abelii)	GO:0003735,GO:0005840,GO:0006412,GO:0015934	GO:0015934
PMZ_0002979	TMEM19	scaf_00002	21769287	21784434	4630.91	2.41505	0.530466	4.55269	5.3e-06	0.00206426	TMEM19	TMM19	desc=Transmembrane protein 19 (Pongo abelii)	GO:0016021	GO:0016021
PMZ_0004740	Cox7a2	scaf_00036	11325799	11329882	17149.1	2.20895	0.485055	4.55401	5.26e-06	0.00206426	Cox7a2	CX7A2	desc=Cytochrome c oxidase subunit 7A2%2C mitochondrial (Rattus norvegicus)	GO:0004129,GO:0005746,GO:0009055	GO:0005746
PMZ_0015161	ccno	scaf_00038	98658	101643	318.764	-6.985	1.55221	-4.50004	6.79e-06	0.00258776	ccno	CCNOB	desc=Cyclin-O protein B (Xenopus laevis)		GO:0005737
PMZ_0004573	mfsd1	scaf_00051	7764040	7778206	701.443	-2.02234	0.458309	-4.41261	1.02e-05	0.00380357	mfsd1	MFSD1	desc=Major facilitator superfamily domain-containing protein 1 (Danio rerio)		GO:0016021
PMZ_0001575	MIEN1	scaf_00006	19691039	19695494	804.629	2.01949	0.459001	4.39974	1.08e-05	0.00384247	MIEN1	MIEN1	desc=Migration and invasion enhancer 1 (Bos taurus)	GO:0008430,GO:0045454	GO:0005829
PMZ_0012405	banf1	scaf_00041	2889421	2896119	65.4487	6.68695	1.51865	4.40323	1.07e-05	0.00384247	banf1		desc=Barrier-to-autointegration factor (Danio rerio)	GO:0003677
PMZ_0039331	mafb	scaf_00020	11579889	11581088	220.8	-2.71364	0.617238	-4.39641	1.1e-05	0.00384247	mafb	MAF	desc=Transcription factor MafB (Danio rerio)	GO:0003677,GO:0003700,GO:0005634,GO:0006355,GO:0043565	GO:0005634
PMZ_0015901	Jun	scaf_00023	1948641	1949934	405.993	-3.07201	0.702944	-4.3702	1.24e-05	0.00409764	Jun	JUN	desc=Transcription factor AP-1 (Mus musculus)	GO:0003677,GO:0003700,GO:0006355,GO:0043565	GO:0005634
PMZ_0031306	Tnfrsf21	scaf_00017	13256206	13292285	1488.48	-2.5365	0.580539	-4.36921	1.25e-05	0.00409764	Tnfrsf21	TNR21	desc=Tumor necrosis factor receptor superfamily member 21 (Mus musculus)	GO:0005515,GO:0007165	GO:0030424
PMZ_0031956	Pcdh8	scaf_00021	9172221	9178893	77.8041	-6.02091	1.37598	-4.37571	1.21e-05	0.00409764	Pcdh8	PCD10/PCD17	desc=Protocadherin-8 (Rattus norvegicus)	GO:0005509,GO:0005886,GO:0007155,GO:0007156,GO:0016020	GO:0016021
PMZ_0000635	GPR19	scaf_00112	33434	35885	184.406	3.68247	0.848013	4.34248	1.41e-05	0.0045406	GPR19	GPR19	desc=Probable G-protein coupled receptor 19 (Homo sapiens)	GO:0004930,GO:0007186,GO:0016021	GO:0016021
PMZ_0014259	GLB5	scaf_00011	8843820	8845119	425.879	4.81508	1.11286	4.32677	1.51e-05	0.0047105		GLB5	Note=Similar to Globin-5 (Petromyzon marinus)	GO:0005506,GO:0015671,GO:0019825,GO:0020037	GO:0020037
PMZ_0030148	Slc12a3	scaf_00008	6191405	6220343	343.468	-3.19087	0.737588	-4.32609	1.52e-05	0.0047105	Slc12a3	S12A3	desc=Solute carrier family 12 member 3 (Mus musculus)	GO:0005215,GO:0006810,GO:0006811,GO:0016020,GO:0055085	GO:0016324
PMZ_0009267	Mettl6	scaf_00100	308745	315282	316.636	-2.93486	0.679959	-4.31623	1.59e-05	0.0048363	Mettl6	METL6	desc=Methyltransferase-like protein 6 (Rattus norvegicus)		GO:0008168
PMZ_0040164	Slc16a3	scaf_00003	19894549	19903963	1275.5	-3.24904	0.755838	-4.29859	1.72e-05	0.00514404	Slc16a3		desc=Monocarboxylate transporter 4 (Mus musculus)	GO:0005887,GO:0008028,GO:0015129,GO:0015718,GO:0016021,GO:0055085
PMZ_0029019	btbd17	scaf_00023	432861	435307	24.0603	-8.24504	1.92454	-4.28415	1.83e-05	0.00534189	btbd17	BTBDH	desc=BTB/POZ domain-containing protein 17 (Xenopus tropicalis)		GO:0005576
PMZ_0047269	Pkhd1l1	scaf_02533	146	3671	67.6335	-3.36188	0.785042	-4.28242	1.85e-05	0.00534189	Pkhd1l1	PKHL1	desc=Fibrocystin-L (Mus musculus)		GO:0016021
PMZ_0010853	ENPP7	scaf_00003	23209999	23213361	33.8792	3.86542	0.907332	4.2602	2.04e-05	0.00577406	ENPP7		desc=Ectonucleotide pyrophosphatase/phosphodiesterase family member 7 (Homo sapiens)	GO:0003824,GO:0008152
PMZ_0043986		scaf_00022	4691537	4701431	324.211	2.56405	0.602242	4.25751	2.07e-05	0.00577406
PMZ_0033355	TNNI1	scaf_00064	2610432	2615606	70.5361	5.08827	1.2007	4.23775	2.26e-05	0.00600584	TNNI1		desc=Troponin I%2C slow skeletal muscle (Homo sapiens)	GO:0005861
PMZ_0035674	ACHE	scaf_00001	22056832	22074301	636.844	2.3805	0.561309	4.24098	2.23e-05	0.00600584	ACHE	ACES	desc=Acetylcholinesterase (Bungarus fasciatus)	GO:0004104	GO:0031225
PMZ_0040727	Lrfn5	scaf_00009	8684205	8685853	128.262	3.22654	0.760113	4.24482	2.19e-05	0.00600584	Lrfn5		desc=Leucine-rich repeat and fibronectin type-III domain-containing protein 5 (Rattus norvegicus)
PMZ_0043241	Secisbp2l	scaf_00031	7745492	7752322	493.487	-2.55917	0.60666	-4.21846	2.46e-05	0.00644102	Secisbp2l	SBP2L	desc=Selenocysteine insertion sequence-binding protein 2-like (Mus musculus)
PMZ_0010455	GLB5	scaf_08435	1289	2587	464.451	4.91001	1.16708	4.20708	2.59e-05	0.00666989		GLB5	Note=Similar to Globin-5 (Petromyzon marinus)	GO:0005506,GO:0015671,GO:0019825,GO:0020037	GO:0020037
PMZ_0028845		scaf_00009	3564542	3568184	374.144	2.4344	0.58416	4.16735	3.08e-05	0.00756598
PMZ_0031052	Cyp3a2	scaf_00011	5105915	5151453	1048.89	2.57206	0.616758	4.17029	3.04e-05	0.00756598	Cyp3a2	K2C8/ION3	desc=Cytochrome P450 3A2 (Rattus norvegicus)	GO:0004497,GO:0005198,GO:0005506,GO:0005882,GO:0016705,GO:0020037,GO:0055114	GO:0045095
PMZ_0038715	OCLN	scaf_02807	1217	3734	285.401	-2.46739	0.592748	-4.16262	3.15e-05	0.00756598	OCLN	OCLN	desc=Occludin (Homo sapiens)	GO:0005923,GO:0016020,GO:0016021,GO:0070830	GO:0016324
PMZ_0041953	API5	scaf_00014	13890070	13902269	1599.17	-2.20194	0.529108	-4.1616	3.16e-05	0.00756598	API5		desc=Apoptosis inhibitor 5 (Gallus gallus)
PMZ_0045260	Sycp3	scaf_00055	1484730	1501621	25175.9	3.48776	0.835927	4.17233	3.01e-05	0.00756598	Sycp3	SYCP3	desc=Synaptonemal complex protein 3 (Rattus norvegicus)		GO:0000775
PMZ_0027044	GLB5	scaf_00011	8918759	8920013	105.047	5.18715	1.2512	4.14575	3.39e-05	0.0079949		GLB5	Note=Similar to Globin-5 (Petromyzon marinus)	GO:0005506,GO:0015671,GO:0019825,GO:0020037	GO:0020037
PMZ_0009292	MARS2	scaf_00026	11802338	11807745	1148.64	2.02039	0.487735	4.14239	3.44e-05	0.00800006	MARS2		desc=Methionine--tRNA ligase%2C mitochondrial (Homo sapiens)	GO:0000166,GO:0004812,GO:0004825,GO:0005524,GO:0005737,GO:0006418,GO:0006431
PMZ_0028751	EHD3	scaf_00029	5835983	5845333	2311.94	-2.08466	0.505708	-4.12226	3.75e-05	0.00858533	EHD3	EHD1	desc=EH domain-containing protein 3 (Homo sapiens)	GO:0005509,GO:0005515,GO:0005525,GO:0032456	GO:0031901
PMZ_0039206	IER5L	scaf_00006	18300657	18300902	32.0613	-5.42766	1.31744	-4.11987	3.79e-05	0.00858533	IER5L	IER5L	desc=Immediate early response gene 5-like protein (Homo sapiens)
PMZ_0032775	CSK	scaf_00102	609808	623046	646.267	-2.37634	0.577328	-4.1161	3.85e-05	0.00861034	CSK	CSK	desc=Tyrosine-protein kinase CSK (Bos taurus)	GO:0005515	GO:0005911
PMZ_0010849	Adipor2	scaf_00027	8148438	8172625	5906.25	1.84102	0.447956	4.10982	3.96e-05	0.00873173	Adipor2		desc=Adiponectin receptor protein 2 (Mus musculus)	GO:0016021
PMZ_0042793	Ap1b1	scaf_00038	6590826	6602449	664.633	-1.95622	0.477716	-4.09495	4.22e-05	0.00919042	Ap1b1	AP1B1	desc=AP-1 complex subunit beta-1 (Mus musculus)	GO:0005488,GO:0006886,GO:0016192,GO:0030117	GO:0030131
PMZ_0044421	Cpa5	scaf_00042	4282400	4288830	113.83	2.99879	0.733184	4.09009	4.31e-05	0.00926466	Cpa5	CBPA1/CBPA5	desc=Carboxypeptidase A5 (Mus musculus)	GO:0004181,GO:0006508,GO:0008270	GO:0005576
PMZ_0048454		scaf_00638	18451	20991	20.414	8.4408	2.06639	4.08481	4.41e-05	0.00935807			Note=Similar to Trypsin (Xenopus laevis)	GO:0004252,GO:0006508
PMZ_0005697	CTSC	scaf_00027	4289409	4291217	396.23	-3.21108	0.789436	-4.06756	4.75e-05	0.00985991	CTSC		desc=Dipeptidyl peptidase 1 (Homo sapiens)	GO:0006508,GO:0008234
PMZ_0028924	NEB	scaf_00016	14930356	15024475	224.677	3.25315	0.79992	4.06684	4.77e-05	0.00985991	NEB	NEBU	desc=Nebulin (Homo sapiens)	GO:0003779,GO:0005515	GO:0015629

## Sheet: 7B_UpregFemaletoLarvae
Pmz.id	Gene.name	location	start	end	Normalised.mean.count	log.2.fold.change	std.error.for.log.2	stat	p.value	padj	Smith_gene_name	Trinotate.Gene_name	DESC_smith	Ontology_term_smith	gene_ontology_blast
PMZ_0000086	Dis3	scaf_00051	4113637	4131115	196.969	1.87963	0.576941	3.25876	0.00111899	0.00494478	Dis3	RRP44	desc=Exosome complex exonuclease RRP44 (Mus musculus)		GO:0005737
PMZ_0000155	ANO6	scaf_04776	6715	12238	148.429	3.12611	1.00684	3.07193	0.00212677	0.00845007	ANO6	ANO6	desc=Anoctamin-6 (Homo sapiens)		GO:0009986
PMZ_0000191	smim12	scaf_00003	833836	834135	502.455	2.39654	0.591671	4.05365	5.04e-05	0.000354631	smim12	SIM12	desc=Small integral membrane protein 12 (Danio rerio)		GO:0016021
PMZ_0000203	plxdc2	scaf_00028	6104243	6142892	1322.47	5.32904	0.509851	10.458	1.35e-25	8.72e-23	plxdc2	PLDX1	desc=Plexin domain-containing protein 2 (Xenopus laevis)		GO:0005737
PMZ_0000204	sgk1	scaf_00003	741930	750038	1089.41	4.42964	0.736195	6.02528	1.69e-09	4.62e-08	sgk1	SGK1A/SGK1B	desc=Serine/threonine-protein kinase Sgk1-A (Xenopus laevis)	GO:0004672,GO:0005524,GO:0006468,GO:0016772	GO:0005783
PMZ_0000247	Fam107b	scaf_00010	8939264	8962903	237.561	2.65642	0.60322	4.42104	9.82e-06	8.65e-05	Fam107b	F107B	desc=Protein FAM107B (Rattus norvegicus)		GO:0007605
PMZ_0000254	suv39h1	scaf_00010	8694470	8703378	1387.15	1.91783	0.552701	3.4619	0.000536379	0.00265524	suv39h1	SUV91	desc=Histone-lysine N-methyltransferase SUV39H1 (Xenopus laevis)	GO:0005515,GO:0005634,GO:0008270,GO:0018024,GO:0034968	GO:0000775
PMZ_0000282	USP15	scaf_00010	7525993	7548869	8314.89	3.35939	0.741396	4.52636	6e-06	5.66e-05	USP15	UBP15	desc=Ubiquitin carboxyl-terminal hydrolase 15 (Bos taurus)	GO:0004843,GO:0006511,GO:0036459	GO:0005737
PMZ_0000369	ZP2	scaf_00768	16353	24258	3305.92	3.92098	1.04234	3.75323	0.000174569	0.00102323	ZP2	ZP2	desc=Zona pellucida sperm-binding protein 2 (Felis catus)		GO:0005783
PMZ_0000374	ZP3	scaf_00768	3200	11621	1064.96	3.81372	0.936025	4.07844	4.53e-05	0.000324869	ZP3	ZP3	desc=Zona pellucida sperm-binding protein 3 (Gallus gallus)		GO:0016021
PMZ_0000375	ZP2	scaf_03619	5274	13178	3554.63	3.92999	1.03141	3.80323	0.00014282	0.000862665	ZP2	ZP2	desc=Zona pellucida sperm-binding protein 2 (Felis catus)		GO:0005783
PMZ_0000378	ZP4	scaf_00478	2712	11291	43163.3	6.94797	0.954556	7.24362	4.37e-13	3.07e-11	ZP4	ZP4	desc=Zona pellucida sperm-binding protein 4 (Homo sapiens)		GO:0016021
PMZ_0000381	ZP4	scaf_02677	327	7770	27348.6	5.35102	1.1303	4.69049	2.73e-06	2.85e-05	ZP4	ZP4	desc=Zona pellucida sperm-binding protein 4 (Homo sapiens)		GO:0016021
PMZ_0000387	ZP3	scaf_00200	49228	55726	40382.6	6.88164	1.018	6.71531	1.88e-11	8.7e-10	ZP3	ZP3	desc=Zona pellucida sperm-binding protein 3 (Gallus gallus)		GO:0016021
PMZ_0000418	Acot7	scaf_00039	1443900	1452829	160.34	2.85016	0.676306	4.20087	2.66e-05	0.000205631	Acot7		desc=Cytosolic acyl coenzyme A thioester hydrolase (Rattus norvegicus)
PMZ_0000460	Gpr176	scaf_00025	10548741	10550869	87.9877	5.53778	0.961901	5.66691	1.45e-08	3.05e-07	Gpr176	GP176	desc=Probable G-protein coupled receptor 176 (Mus musculus)	GO:0004930,GO:0007186,GO:0016021	GO:0016021
PMZ_0000463		scaf_00025	10280459	10287413	1048.14	2.89043	0.481983	5.99506	2.03e-09	5.46e-08			Note=Protein of unknown function
PMZ_0000485	CARKD	scaf_00026	5907921	5916596	2004.79	1.22513	0.390024	3.14187	0.00167874	0.00695893	CARKD		desc=ATP-dependent (S)-NAD(P)H-hydrate dehydratase (Bos taurus)	GO:0003677,GO:0052855
PMZ_0000486	cars2	scaf_00026	5919496	5940291	1089.94	1.17506	0.359951	3.26284	0.001103	0.00489284	cars2		desc=Probable cysteine--tRNA ligase%2C mitochondrial (Xenopus tropicalis)	GO:0000166,GO:0004812,GO:0005524,GO:0006418
PMZ_0000490		scaf_00026	5993901	5999475	424.576	3.76812	0.83646	4.4893	7.15e-06	6.59e-05			Note=Protein of unknown function	GO:0005515
PMZ_0000637	Ttll12	scaf_00014	8980171	8994748	2071.45	2.37851	0.41864	5.68415	1.31e-08	2.8e-07	Ttll12		desc=Tubulin--tyrosine ligase-like protein 12 (Mus musculus)	GO:0006464
PMZ_0000795	FAM89A	scaf_00025	5102334	5103445	116.582	4.30727	0.846969	5.06083	4.17e-07	5.57e-06	FAM89A	FA89A	desc=Protein FAM89A (Bos taurus)
PMZ_0000875	DMBT1	scaf_01135	14513	16744	13129	5.08109	1.09119	4.6206	3.83e-06	3.85e-05	DMBT1		desc=Deleted in malignant brain tumors 1 protein (Homo sapiens)
PMZ_0000882	DYRK4	scaf_00878	22786	30985	10.3446	4.59697	1.14444	3.8587	0.000113991	0.000715435	DYRK4		desc=Dual specificity tyrosine-phosphorylation-regulated kinase 4 (Homo sapiens)	GO:0004672,GO:0005524,GO:0006468,GO:0016772
PMZ_0000991	Smyd1	scaf_00018	8365822	8387465	80.2036	1.61057	0.443274	3.63097	0.000282355	0.00153923	Smyd1	SMYD1	desc=Histone-lysine N-methyltransferase Smyd1 (Mus musculus)		GO:0005737
PMZ_0000999	Zmat4	scaf_00522	33731	41252	6899.03	1.79063	0.379095	4.72497	2.3e-06	2.47e-05	Zmat4	ZMAT4	desc=Zinc finger matrin-type protein 4 (Mus musculus)	GO:0003676,GO:0005634,GO:0008270,GO:0046872	GO:0005634
PMZ_0001024	tmem192	scaf_00075	2049265	2067924	2522.41	3.74502	0.526907	7.10864	1.17e-12	7.59e-11	tmem192		desc=Transmembrane protein 192 (Xenopus tropicalis)
PMZ_0001031	DYRK4	scaf_00445	53216	56905	29.6584	5.15771	1.14751	4.32964	1.49e-05	0.000124407	DYRK4	DYRK4	desc=Dual specificity tyrosine-phosphorylation-regulated kinase 4 (Homo sapiens)	GO:0004672,GO:0005524,GO:0006468,GO:0016772	GO:0005737
PMZ_0001053		scaf_00006	10537686	10548583	3466.33	1.36389	0.452763	3.01195	0.00259576	0.0099695		YNS9	Note=Protein of unknown function	GO:0046872
PMZ_0001103	exd1	scaf_00021	4027083	4044486	159.019	2.37761	0.490585	4.84158	1.29e-06	1.48e-05	exd1	EXD1	desc=Exonuclease 3'-5' domain-containing protein 1 (Xenopus laevis)	GO:0003676	GO:0008408
PMZ_0001128	Arhgap40	scaf_00001	11979034	12003312	1079.87	2.28908	0.431396	5.30316	1.14e-07	1.84e-06	Arhgap40	RHG18	desc=Rho GTPase-activating protein 40 (Mus musculus)	GO:0007165	GO:0005829
PMZ_0001165	MAEA	scaf_00041	4402285	4408510	3492.89	1.78389	0.461089	3.8697	0.000108971	0.000688151	MAEA		desc=Macrophage erythroblast attacher (Homo sapiens)	GO:0005515
PMZ_0001169	PRADC1	scaf_00041	4370657	4377901	1992.43	2.60104	0.520551	5.00162	5.69e-07	7.21e-06	PRADC1		desc=Protease-associated domain-containing protein 1 (Homo sapiens)
PMZ_0001306	TAF1A	scaf_00009	2342846	2347373	297.912	1.87231	0.483347	3.87457	0.000106812	0.000675396	TAF1A		desc=TATA box-binding protein-associated factor RNA polymerase I subunit A (Homo sapiens)	GO:0000120,GO:0006360
PMZ_0001334	Akap12	scaf_00009	2708766	2710871	3511.52	4.07413	1.10406	3.68028	0.000232978	0.00130647	Akap12		desc=A-kinase anchor protein 12 (Mus musculus)	GO:0006605,GO:0007165,GO:0010739,GO:0051018,GO:0090036
PMZ_0001413	SLC45A3	scaf_00002	22549572	22553866	204.277	2.26278	0.616066	3.68414	0.000229478	0.00129019	SLC45A3	S45A3	desc=Solute carrier family 45 member 3 (Macaca fascicularis)		GO:0016021
PMZ_0001422	SIAH1	scaf_00020	8827132	8834836	507.573	2.29426	0.432359	5.30196	1.15e-07	1.85e-06	SIAH1	SIAH1	desc=E3 ubiquitin-protein ligase SIAH1 (Homo sapiens)	GO:0004842,GO:0005515,GO:0005634,GO:0006511,GO:0007275,GO:0008270,GO:0016567	GO:0030877
PMZ_0001482	SARS2	scaf_00069	1864300	1882349	1081.98	2.36016	0.531991	4.43887	9.04e-06	8.07e-05	SARS2	SYSM	desc=Serine--tRNA ligase%2C mitochondrial (Bos taurus)	GO:0000166,GO:0004812,GO:0004828,GO:0005524,GO:0005737,GO:0006418,GO:0006434	GO:0005759
PMZ_0001484	Gzf1	scaf_00069	1836112	1846644	551.704	2.55274	0.5092	5.01215	5.38e-07	6.9e-06	Gzf1	GZF1	desc=GDNF-inducible zinc finger protein 1 (Rattus norvegicus)	GO:0003676,GO:0005515,GO:0046872	GO:0005737
PMZ_0001509	VPS26A	scaf_00012	5261128	5275309	2318.3	1.76188	0.485887	3.62688	0.000286869	0.00155872	VPS26A	VP26A	desc=Vacuolar protein sorting-associated protein 26A (Homo sapiens)		GO:0005768
PMZ_0001540	Znf622	scaf_00028	12114467	12121256	1125.03	1.32612	0.437307	3.03354	0.00241705	0.00938648	Znf622	ZN622	desc=Zinc finger protein 622 (Rattus norvegicus)	GO:0003676,GO:0008270,GO:0046872	GO:0005737
PMZ_0001580	Rasef	scaf_00006	19398346	19418603	133.592	2.42198	0.764284	3.16884	0.00153049	0.0064476	Rasef	RASEF	desc=Ras and EF-hand domain-containing protein homolog (Mus musculus)	GO:0005509,GO:0005525,GO:0005622,GO:0007165,GO:0007264,GO:0015031,GO:0016020	GO:0048471
PMZ_0001581	RND2	scaf_00028	2188306	2190771	140.376	4.43543	0.500478	8.83948	9.62e-19	1.87e-16	RND2	RND3	desc=Rho-related GTP-binding protein RhoN (Homo sapiens)	GO:0005525,GO:0005622,GO:0007264	GO:0005622
PMZ_0001582	PTGES3	scaf_00028	2151551	2161473	60.0557	2.97378	0.70251	4.22933	2.34e-05	0.000184404	PTGES3	TEBP	desc=Prostaglandin E synthase 3 (Bos taurus)		GO:0005737
PMZ_0001609	AKAP9	scaf_00028	1574329	1601062	2003.53	3.73968	0.473389	7.89516	2.9e-15	3e-13	AKAP9	AKAP9	desc=A-kinase anchor protein 9 (Homo sapiens)		GO:0005813
PMZ_0001621	2020-03-04	scaf_00018	9084798	9100179	684.149	1.99245	0.444979	4.47841	7.52e-06	6.87e-05	MARH5	MARH5	desc=E3 ubiquitin-protein ligase MARCH5 (Bos taurus)		GO:0005783
PMZ_0001625	ccnj	scaf_00018	9212531	9234971	1129.91	4.42784	0.507643	8.72208	2.73e-18	4.78e-16	ccnj	CCNJ	desc=Cyclin-J (Xenopus laevis)	GO:0005634	GO:0005634
PMZ_0001702	XKR6	scaf_00040	1548126	1568013	743.54	1.78382	0.475476	3.74441	0.000180818	0.00105446	XKR6	XKR6	desc=XK-related protein 6 (Homo sapiens)		GO:0016021
PMZ_0001719	SHQ1	scaf_00027	9136960	9162501	2127.8	2.62541	0.395677	6.63569	3.23e-11	1.42e-09	SHQ1		desc=Protein SHQ1 homolog (Bos taurus)
PMZ_0001725	DCLRE1B	scaf_00027	9086921	9096846	933.298	1.97803	0.398004	4.96887	6.73e-07	8.35e-06	DCLRE1B		desc=5' exonuclease Apollo (Ailuropoda melanoleuca)
PMZ_0001730	Tstd3	scaf_00003	11998407	12004456	196.392	3.20728	0.8264	3.8894	0.000100494	0.00064024	Tstd3	RDL/TSTD1	desc=Thiosulfate sulfurtransferase/rhodanese-like domain-containing protein 3 (Mus musculus)		GO:0005737
PMZ_0001748	ABCG2	scaf_00012	7282281	7298736	804.206	3.13855	0.5642	5.55559	2.77e-08	5.35e-07	ABCG2	ABCG2	desc=ATP-binding cassette sub-family G member 2 (Homo sapiens)	GO:0005524,GO:0016020,GO:0016021,GO:0016887,GO:0042626,GO:0055085	GO:0016021
PMZ_0001801	DHODH	scaf_00008	4326198	4342499	1218.62	2.73769	0.513113	5.33805	9.4e-08	1.56e-06	DHODH	PYRD	desc=Dihydroorotate dehydrogenase (quinone)%2C mitochondrial (Bos taurus)	GO:0003824,GO:0004152,GO:0005737,GO:0006207,GO:0016020,GO:0016627,GO:0055114	GO:0016021
PMZ_0001846	pgap3	scaf_00016	9583341	9590734	443.726	1.47767	0.431873	3.42273	0.00061995	0.00300763	pgap3	PGAP3	desc=Post-GPI attachment to proteins factor 3 (Danio rerio)		GO:0000139
PMZ_0001875	SLC38A11	scaf_00004	12513737	12540892	1871.49	2.62593	0.383225	6.84671	7.56e-12	3.94e-10	SLC38A11	S38AB	desc=Putative sodium-coupled neutral amino acid transporter 11 (Bos taurus)		GO:0016021
PMZ_0001911	sox11	scaf_00001	2750164	2751411	653.026	1.81879	0.410371	4.4362	9.16e-06	8.15e-05	sox11	SOX11/SOX11B	desc=Transcription factor Sox-11 (Xenopus tropicalis)	GO:0003700	GO:0005634
PMZ_0001962	TMEM180	scaf_00015	5326539	5332952	2078.3	1.62815	0.419807	3.87611	0.000106141	0.000671974	TMEM180	MF13A	desc=Transmembrane protein 180 (Gallus gallus)
PMZ_0001963	Nop56	scaf_00015	5333337	5340591	18168.6	1.41076	0.454113	3.11161	0.00186072	0.00757273	Nop56	NOP56	desc=Nucleolar protein 56 (Mus musculus)		GO:0031428
PMZ_0002006	ARHGAP9	scaf_00307	18926	20029	34.3682	2.20243	0.730379	3.01072	0.00260626	0.0100053	ARHGAP9		desc=Rho GTPase-activating protein 9 (Homo sapiens)	GO:0005515
PMZ_0002027	DCTN4	scaf_00012	4728638	4741051	2219	2.20923	0.430036	5.13968	2.75e-07	3.93e-06	DCTN4	DCTN4	desc=Dynactin subunit 4 (Homo sapiens)	GO:0005869	GO:0005813
PMZ_0002060	GTSE1	scaf_00022	3457178	3471914	1613.77	2.61162	0.424956	6.14459	8.02e-10	2.39e-08	GTSE1		desc=G2 and S phase-expressed protein 1 (Homo sapiens)
PMZ_0002100	wdr12	scaf_00004	18272924	18292253	1889.89	2.30979	0.381042	6.06442	1.32e-09	3.72e-08	wdr12	WDR12	desc=Ribosome biogenesis protein wdr12 (Danio rerio)	GO:0005515	GO:0005730
PMZ_0002139	DTL	scaf_00025	8388590	8402176	424.779	4.21245	0.716132	5.87283	4.28e-09	1.04e-07	DTL	DTLB	desc=Denticleless protein homolog (Homo sapiens)	GO:0005515	GO:0005813
PMZ_0002181	MTRR	scaf_00016	3094987	3113405	762.732	1.81906	0.483064	3.76454	0.000166857	0.000985167	MTRR	MTRR	desc=Methionine synthase reductase (Homo sapiens)	GO:0005506,GO:0010181,GO:0016491,GO:0055114	GO:0005737
PMZ_0002183		scaf_00016	3133565	3146700	696.341	1.91461	0.603072	3.17441	0.0015014	0.00635122
PMZ_0002198		scaf_00006	446252	479465	1284.27	1.12249	0.342325	3.28116	0.00103381	0.00463997
PMZ_0002225	PAXIP1	scaf_00005	7631388	7664264	542.514	2.99414	0.625095	4.78781	1.69e-06	1.88e-05	PAXIP1	PAXI1	desc=PAX-interacting protein 1 (Bos taurus)		GO:0016363
PMZ_0002230	s100a1	scaf_10245	1147	2042	8355.71	3.70258	1.13455	3.24444	0.00117683	0.00516725	s100a1		desc=Protein S100-A1 (Misgurnus fossilis)
PMZ_0002234	NMT3	scaf_00025	6959270	6975312	3736.42	2.71889	0.713131	3.81239	0.000137629	0.000837282	NMT3	PEAM3	desc=Phosphoethanolamine N-methyltransferase 3 (Arabidopsis thaliana)	GO:0008152,GO:0008168	GO:0005737
PMZ_0002242	WDHD1	scaf_00025	6867825	6884908	1973.82	1.88276	0.478062	3.93163	8.44e-05	0.000550891	WDHD1	WDHD1	desc=WD repeat and HMG-box DNA-binding protein 1 (Homo sapiens)	GO:0005515	GO:0000775
PMZ_0002253	cpsf2	scaf_00025	7185905	7204976	3236.99	3.0009	0.365387	8.21353	2.15e-16	2.98e-14	cpsf2	CPSF2	desc=Cleavage and polyadenylation specificity factor subunit 2 (Xenopus laevis)	GO:0005847,GO:0006378,GO:0006379	GO:0016020
PMZ_0002273	Ptpn23	scaf_00028	2727584	2757625	4100.13	1.17542	0.312714	3.75872	0.000170784	0.001005	Ptpn23	PTN23	desc=Tyrosine-protein phosphatase non-receptor type 23 (Fragment) (Rattus norvegicus)	GO:0004725,GO:0006470,GO:0016311,GO:0016791,GO:0030334,GO:0043162,GO:0060271	GO:0036064
PMZ_0002328	arl8ba	scaf_00022	10111434	10119796	2857.26	3.28807	0.627937	5.22957	1.7e-07	2.6e-06	arl8ba		desc=ADP-ribosylation factor-like protein 8B-A (Danio rerio)	GO:0005525,GO:0005622,GO:0006886,GO:0007264
PMZ_0002350	Slc11a2	scaf_00004	16552862	16573585	1798.13	2.50231	0.398853	6.27646	3.46e-10	1.15e-08	Slc11a2	NRAM2	desc=Natural resistance-associated macrophage protein 2 (Rattus norvegicus)	GO:0005215,GO:0006810,GO:0016020	GO:0045177
PMZ_0002388	Deptor	scaf_00122	483944	494313	351.337	2.48505	0.605129	4.10816	3.99e-05	0.000290482	Deptor	DPTOR	desc=DEP domain-containing mTOR-interacting protein (Mus musculus)	GO:0005515,GO:0035556	GO:0005622
PMZ_0002416	KDM1B	scaf_00011	7286075	7316909	1790.61	1.68628	0.433712	3.88402	0.000102742	0.000652852	KDM1B	KDM1B	desc=Lysine-specific histone demethylase 1B (Homo sapiens)	GO:0003677,GO:0008152,GO:0008270,GO:0016491,GO:0055114	GO:0005634
PMZ_0002426	KIF2A	scaf_00023	2567083	2590280	3775.88	1.55866	0.437846	3.55285	0.000381087	0.00198835	KIF2A	KIF2A	desc=Kinesin-like protein KIF2A (Pongo abelii)	GO:0003777,GO:0005524,GO:0005871,GO:0007018,GO:0008017	GO:0005737
PMZ_0002438	C9orf72	scaf_00023	2774530	2782575	747.979	1.65853	0.497234	3.33554	0.000851348	0.00392657	C9orf72	CI072	desc=Protein C9orf72 (Homo sapiens)		GO:0005776
PMZ_0002486	ccdc80	scaf_00161	199784	255054	3287.1	4.41939	0.682031	6.46769	9.95e-11	3.84e-09	ccdc80		desc=Coiled-coil domain-containing protein 80 (Danio rerio)
PMZ_0002516	YIPF1	scaf_00023	3252648	3257661	1893.97	2.16524	0.346155	6.25378	4.01e-10	1.31e-08	YIPF1	YIPF1	desc=Protein YIPF1 (Homo sapiens)	GO:0016020	GO:0016021
PMZ_0002572	abcb8	scaf_00004	14784669	14803654	1521.51	1.45909	0.448221	3.25759	0.00112364	0.00495835	abcb8	ABCB8	desc=ATP-binding cassette sub-family B member 8%2C mitochondrial (Danio rerio)	GO:0005524,GO:0006810,GO:0016021,GO:0016887,GO:0042626,GO:0055085	GO:0016021
PMZ_0002614	KDM1A	scaf_00058	2905468	2934388	1541.11	1.51305	0.383817	3.94105	8.11e-05	0.000533113	KDM1A		desc=Lysine-specific histone demethylase 1A (Homo sapiens)	GO:0003677,GO:0008152,GO:0016491,GO:0055114
PMZ_0002617	fam50a	scaf_00082	915133	924522	2701.97	1.63586	0.460976	3.54985	0.000385452	0.00200574	fam50a		desc=Protein FAM50A (Danio rerio)	GO:0005634
PMZ_0002629	CPM	scaf_00082	1054973	1065938	291.72	4.2653	0.591905	7.19796	6.11e-13	4.18e-11	CPM		desc=Carboxypeptidase M (Homo sapiens)	GO:0004181,GO:0006508,GO:0008270
PMZ_0002667	Alox12b	scaf_00051	1910979	1913181	4278.06	5.05765	0.955978	5.2779	1.31e-07	2.07e-06	Alox12b	LX12B/LOX12	desc=Arachidonate 12-lipoxygenase%2C 12R-type (Mus musculus)	GO:0016702,GO:0046872,GO:0055114	GO:0005737
PMZ_0002714	MSH3	scaf_00013	7073630	7140684	937.323	1.79007	0.567406	3.15623	0.00159825	0.00667745	MSH3	MSH3	desc=DNA mismatch repair protein Msh3 (Homo sapiens)	GO:0005524,GO:0006298,GO:0030983	GO:0016020
PMZ_0002740	GUK1	scaf_00035	6152631	6175880	731.149	2.07358	0.456079	4.55075	5.35e-06	5.12e-05	GUK1		desc=Guanylate kinase (Homo sapiens)	GO:0004385,GO:0006163
PMZ_0002778	WDR1	scaf_00015	13866750	13890148	5741.11	1.6468	0.327402	5.03298	4.83e-07	6.3e-06	WDR1	WDR1	desc=WD repeat-containing protein 1 (Bos taurus)	GO:0005515	GO:0005884
PMZ_0002795	MGAT5	scaf_00004	24611185	24661321	286.635	2.68755	0.528883	5.08357	3.7e-07	5.02e-06	MGAT5	MGT5A	desc=Alpha-1%2C6-mannosylglycoprotein 6-beta-N-acetylglucosaminyltransferase A (Homo sapiens)	GO:0006487,GO:0030144	GO:0070062
PMZ_0002835		scaf_00001	21419997	21427233	13661	4.86809	1.389	3.36081	0.000777154	0.00364819		S10A1	Note=Protein of unknown function		GO:0005737
PMZ_0002852	PXYLP1	scaf_00048	5040198	5047179	483.504	2.42307	0.677313	3.56769	0.000360146	0.00189077	PXYLP1	PXYP1	desc=2-phosphoxylose phosphatase 1 (Homo sapiens)	GO:0003993	GO:0005576
PMZ_0002857	ZDHHC16	scaf_00015	2541466	2554795	580.156	3.98732	0.576897	6.90604	4.98e-12	2.72e-10	ZDHHC16	ZDH16	desc=Probable palmitoyltransferase ZDHHC16 (Homo sapiens)		GO:0005783
PMZ_0002907	UTP6	scaf_00037	10166010	10182674	1070.67	2.5159	0.512682	4.90805	9.2e-07	1.1e-05	UTP6	UTP6	desc=U3 small nucleolar RNA-associated protein 6 homolog (Homo sapiens)	GO:0005515,GO:0005622,GO:0006396	GO:0005730
PMZ_0002979	TMEM19	scaf_00002	21769287	21784434	4389.98	2.72454	0.638582	4.27163	1.94e-05	0.000156279	TMEM19	TMM19	desc=Transmembrane protein 19 (Pongo abelii)	GO:0016021	GO:0016021
PMZ_0003032		scaf_00009	10980394	10991586	38.9301	5.0587	1.01233	4.85516	1.2e-06	1.39e-05			Note=Protein of unknown function
PMZ_0003038	Ficd	scaf_02235	18637	19997	4466.22	3.71434	0.445727	8.3353	7.73e-17	1.17e-14	Ficd	FICD	desc=Adenosine monophosphate-protein transferase FICD (Mus musculus)	GO:0005515	GO:0016021
PMZ_0003052	ENAH	scaf_00009	9390985	9438946	4795.28	1.66029	0.442353	3.7521	0.000175359	0.00102694	ENAH		desc=Protein enabled homolog (Homo sapiens)	GO:0016020,GO:0016628,GO:0055114
PMZ_0003067	Grin2a	scaf_00019	12769897	12774277	11.7038	3.36836	0.977043	3.37364	0.000741801	0.00350766	Grin2a	NMDE2	desc=Glutamate receptor ionotropic%2C NMDA 2A (Mus musculus)		GO:0030054
PMZ_0003103	TBC1D5	scaf_00005	16631208	16682610	14295.6	2.8853	0.381223	7.56842	3.78e-14	3.19e-12	TBC1D5	TBCD5	desc=TBC1 domain family member 5 (Homo sapiens)		GO:0030904
PMZ_0003104	MOB4	scaf_00005	16627675	16631131	12741.2	2.08695	0.458456	4.55319	5.28e-06	5.08e-05	MOB4	PHOCN	desc=MOB-like protein phocein (Homo sapiens)		GO:0005737
PMZ_0003109		scaf_00011	9460384	9472697	5181.87	1.72149	0.503573	3.42241	0.000620676	0.00300957		VATL	Note=Similar to V-type proton ATPase 16 kDa proteolipid subunit (Torpedo marmorata)	GO:0015078,GO:0015991,GO:0033177,GO:0033179	GO:0016021
PMZ_0003131	CYB5R3	scaf_00002	15147545	15162385	8262.43	2.75414	0.401371	6.86242	6.77e-12	3.55e-10	CYB5R3	NB5R3	desc=NADH-cytochrome b5 reductase 3 (Bos taurus)	GO:0016491,GO:0055114	GO:0005789
PMZ_0003150	Mtrf1	scaf_00021	9242900	9249573	370.497	1.78804	0.495376	3.60498	0.000312179	0.00167516	Mtrf1	RF1M	desc=Peptide chain release factor 1%2C mitochondrial (Mus musculus)	GO:0003747,GO:0005737,GO:0006415,GO:0016149	GO:0005739
PMZ_0003170	smarcad1	scaf_00024	8053344	8075552	5019.41	1.05102	0.3332	3.15039	0.0016305	0.0067894	smarcad1	SMRCD	desc=SWI/SNF-related matrix-associated actin-dependent regulator of chromatin subfamily A containing DEAD/H box 1 (Xenopus tropicalis)	GO:0003677,GO:0005515,GO:0005524	GO:0005634
PMZ_0003185	henmt1	scaf_00024	8319167	8330067	319.484	3.5568	0.893485	3.97443	7.05e-05	0.000472547	henmt1	HENMT	desc=Small RNA 2'-O-methyltransferase (Danio rerio)	GO:0001510,GO:0008171,GO:0008173	GO:0043186
PMZ_0003195	Camsap2	scaf_00024	8469339	8506387	870.074	1.84746	0.467077	3.95418	7.68e-05	0.000508981	Camsap2	CAMP1	desc=Calmodulin-regulated spectrin-associated protein 2 (Mus musculus)	GO:0005515,GO:0008017	GO:0005737
PMZ_0003203	CLINT1	scaf_00018	4207880	4228922	2270.5	1.5115	0.434452	3.4793	0.000502725	0.00251233	CLINT1	EPN4	desc=Clathrin interactor 1 (Bos taurus)	GO:0005794,GO:0016020,GO:0016192	GO:0030136
PMZ_0003220	EXD3	scaf_00024	8794371	8882910	4193.11	2.53866	0.485802	5.22218	1.77e-07	2.69e-06	EXD3	MUT7	desc=Exonuclease mut-7 homolog (Homo sapiens)	GO:0003676,GO:0006139,GO:0008408	GO:0008408
PMZ_0003231	SSUH2	scaf_00027	6424329	6450147	1204.76	2.46224	0.491812	5.00139	5.69e-07	7.21e-06	SSUH2		desc=Protein SSUH2 homolog (Homo sapiens)
PMZ_0003240		scaf_00027	6053288	6061333	798.46	1.28379	0.361277	3.55032	0.000384768	0.00200271			Note=Similar to UPF0536 protein C12orf66 homolog (Mus musculus)
PMZ_0003263	ZNHIT3	scaf_00127	6868	11808	275.098	2.17233	0.594245	3.65119	0.000261025	0.00144119	ZNHIT3		desc=Zinc finger HIT domain-containing protein 3 (Homo sapiens)
PMZ_0003280	ABCG1	scaf_00030	8085359	8118010	188.734	4.15429	0.764661	5.42391	5.83e-08	1.02e-06	ABCG1		desc=ATP-binding cassette sub-family G member 1 (Homo sapiens)	GO:0005524,GO:0016020,GO:0016021,GO:0016887
PMZ_0003289		scaf_00035	11810784	11820492	37.268	3.3735	0.808267	4.1535	3.27e-05	0.000244912				GO:0004864,GO:0007165
PMZ_0003298	SH3GL3	scaf_00006	11637454	11648847	7991.94	1.94866	0.334218	5.82779	5.62e-09	1.32e-07	SH3GL3	SH3G1	desc=Endophilin-A3 (Gallus gallus)	GO:0005515,GO:0005737,GO:0006897	GO:0030054
PMZ_0003368	SMARCE1	scaf_00004	18687473	18695352	528.252	1.47018	0.483005	3.04557	0.00232243	0.00907709	SMARCE1	SMCE1	desc=SWI/SNF-related matrix-associated actin-dependent regulator of chromatin subfamily E member 1 (Homo sapiens)	GO:0016514,GO:0043044	GO:0071565
PMZ_0003475	bora	scaf_00015	16026757	16045028	1355.02	2.05962	0.57028	3.61113	0.00030487	0.0016432	bora	BORA	desc=Protein aurora borealis (Danio rerio)		GO:0072687
PMZ_0003516		scaf_00037	9451611	9460750	97.1324	2.07483	0.591936	3.50336	0.000459436	0.00232628
PMZ_0003546	Dlgap3	scaf_00017	13908324	13924665	628.061	3.08922	0.710256	4.33815	1.44e-05	0.000120305	Dlgap3	DLGP2/DLGP3	desc=Disks large-associated protein 3 (Mus musculus)	GO:0023052	GO:0030054
PMZ_0003553	NRF1	scaf_00042	3946752	3964440	1288.72	2.09138	0.402202	5.19848	2.01e-07	3e-06	NRF1	NRF1	desc=Nuclear respiratory factor 1 (Homo sapiens)		GO:0005634
PMZ_0003569	RBSN	scaf_00042	4264874	4269274	917.416	1.61635	0.449281	3.59449	0.000325026	0.00173309	RBSN	RBNS5	desc=Rabenosyn-5 (Homo sapiens)		GO:0031901
PMZ_0003616		scaf_00004	21520411	21521322	29.7662	3.2246	0.712997	4.49227	7.05e-06	6.52e-05		ARHG1	Note=Protein of unknown function	GO:0005089,GO:0035023	GO:0005737
PMZ_0003618		scaf_00004	21528075	21530818	68.515	3.94888	0.853579	4.60651	4.09e-06	4.08e-05
PMZ_0003625	s100a1	scaf_00041	8922741	8944205	3521.86	3.34941	0.915505	3.66834	0.00024413	0.00136075	s100a1		desc=Protein S100-A1 (Misgurnus fossilis)	GO:0005524,GO:0016021,GO:0042626,GO:0055085
PMZ_0003672	SSFA2	scaf_00004	8729790	8763363	3951.52	3.02246	0.581865	5.19398	2.06e-07	3.06e-06	SSFA2	SSFA2	desc=Sperm-specific antigen 2 (Homo sapiens)	GO:0003779,GO:0005102,GO:0005886	GO:0005737
PMZ_0003727	Nedd4l	scaf_00013	1116723	1155608	1886.37	1.64916	0.40692	4.05224	5.07e-05	0.000356527	Nedd4l	NED4L	desc=E3 ubiquitin-protein ligase NEDD4-like (Mus musculus)	GO:0004842,GO:0005515	GO:0005737
PMZ_0003736	atp8b1	scaf_00013	1263359	1316654	2147.84	2.12619	0.566943	3.75561	0.000172921	0.00101541	atp8b1	AT8B1	desc=Phospholipid-transporting ATPase IC (Xenopus tropicalis)	GO:0000166,GO:0000287,GO:0004012,GO:0005524,GO:0015914,GO:0016021,GO:0046872	GO:0005783
PMZ_0003752	GSG2	scaf_00022	9746965	9786628	1494.68	1.95589	0.435397	4.49461	6.97e-06	6.45e-05	GSG2		desc=Serine/threonine-protein kinase haspin (Bos taurus)	GO:0016772
PMZ_0003771	PLIN3	scaf_00006	9727373	9754019	23475.7	3.49042	0.464134	7.52494	5.27e-14	4.36e-12	PLIN3	PLIN2	desc=Perilipin-3 (Homo sapiens)		GO:0005829
PMZ_0003815	HELQ	scaf_00015	7032438	7050489	3300.61	1.73534	0.494634	3.5035	0.000459185	0.00232586	HELQ	HELQ	desc=Helicase POLQ-like (Homo sapiens)	GO:0003676,GO:0005524	GO:0005730
PMZ_0003835	ZP2	scaf_00200	186471	197045	17027.2	6.65438	0.969103	6.83092	8.44e-12	4.36e-10	ZP2	ZP1/ZP4	desc=Zona pellucida sperm-binding protein 2 (Canis familiaris)		GO:0016021
PMZ_0003861	TECTA	scaf_00019	1600910	1629936	8829	5.31376	0.835994	6.35495	2.08e-10	7.27e-09	TECTA	FCGBP	desc=Alpha-tectorin (Homo sapiens)		GO:0070062
PMZ_0003890	ints12	scaf_00003	13744652	13752579	1046.5	3.52508	0.858872	4.10362	4.07e-05	0.000295579	ints12	INT12	desc=Integrator complex subunit 12 (Danio rerio)	GO:0005515,GO:0008270	GO:0032039
PMZ_0003910	SMYD3	scaf_00069	1981072	2002159	356.419	2.05206	0.536861	3.82381	0.000131405	0.000804201	SMYD3	SMYD3	desc=Histone-lysine N-methyltransferase SMYD3 (Homo sapiens)	GO:0005515	GO:0005737
PMZ_0003961		scaf_00023	13009985	13033277	381.281	3.00171	0.426019	7.04486	1.86e-12	1.14e-10				GO:0003677
PMZ_0004005	Tktl2	scaf_00042	9703842	9722689	16491.6	2.06438	0.512534	4.0343	5.48e-05	0.000380204	Tktl2	TKTL2	desc=Transketolase-like protein 2 (Mus musculus)	GO:0003824,GO:0008152	GO:0005737
PMZ_0004017	Degs2	scaf_00029	6680096	6683451	620.24	5.66817	1.02661	5.48595	4.11e-08	7.58e-07	Degs2	DEGS2	desc=Sphingolipid delta(4)-desaturase/C4-hydroxylase DES2 (Mus musculus)	GO:0006629,GO:0016021,GO:0030148,GO:0042284	GO:0005789
PMZ_0004056	RINT1	scaf_00010	10327459	10344068	3753.92	1.89161	0.470614	4.01713	5.89e-05	0.000403515	RINT1	RINT1	desc=RAD50-interacting protein 1 (Homo sapiens)	GO:0005783,GO:0048193	GO:0005783
PMZ_0004059	MAPK12	scaf_00010	10480194	10505920	621.814	2.80767	0.487152	5.77339	7.77e-09	1.75e-07	MAPK12	MK12	desc=Mitogen-activated protein kinase 12 (Homo sapiens)	GO:0004672,GO:0004707,GO:0005524,GO:0006468,GO:0016772	GO:0005737
PMZ_0004075	FEM1C	scaf_00029	549614	551485	1283.39	2.80696	0.617145	4.54135	5.59e-06	5.32e-05	FEM1C	FEM1C	desc=Protein fem-1 homolog C (Bos taurus)	GO:0005515	GO:0005737
PMZ_0004088	ucp2	scaf_00021	2627703	2637761	1985.07	1.81359	0.520795	3.49306	0.000477514	0.00240607	ucp2	UCP2	desc=Mitochondrial uncoupling protein 2 (Cyprinus carpio)	GO:0006839,GO:0031966	GO:0016021
PMZ_0004090	cwf19l1	scaf_00907	1433	6705	278.663	1.9844	0.44988	4.41077	1.03e-05	9.02e-05	cwf19l1	C19L1	desc=CWF19-like protein 1 (Danio rerio)		GO:0003824
PMZ_0004112	TACR3	scaf_00012	2626409	2644262	222.82	4.0249	0.885116	4.5428	5.55e-06	5.29e-05	TACR3	NK3R	desc=Neuromedin-K receptor (Oryctolagus cuniculus)	GO:0004930,GO:0004995,GO:0005886,GO:0007186,GO:0016021	GO:0005737
PMZ_0004289	LRAT	scaf_00026	7055182	7059273	634.215	3.85759	1.04415	3.68567	0.000228106	0.00128471	LRAT		desc=Lecithin retinol acyltransferase (Bos taurus)
PMZ_0004313	NAA35	scaf_00013	7771841	7785133	4501.66	1.41573	0.459514	3.07871	0.00207898	0.00828224	NAA35	A35	desc=N-alpha-acetyltransferase 35%2C NatC auxiliary subunit (Homo sapiens)		GO:0005737
PMZ_0004375	F8A1	scaf_00011	12648983	12652995	259.34	1.99411	0.542092	3.67912	0.000234044	0.00131168	F8A1	F8I2	desc=Factor VIII intron 22 protein (Homo sapiens)
PMZ_0004446	incenp	scaf_00003	16616767	16634736	2330.82	1.87253	0.428009	4.37497	1.21e-05	0.000103607	incenp	INCE	desc=Inner centromere protein A (Xenopus laevis)		GO:0005694
PMZ_0004486	TMEM104	scaf_00037	348949	357219	53.8487	2.62276	0.69272	3.77914	0.000157372	0.000936853	TMEM104	TM104	desc=Transmembrane protein 104 (Gallus gallus)		GO:0016021
PMZ_0004533	Sppl3	scaf_00038	6646801	6670930	292.195	2.20217	0.593767	3.7099	0.000207342	0.00118564	Sppl3	SPPL3	desc=Signal peptide peptidase-like 3 (Mus musculus)	GO:0004190,GO:0016021	GO:0030660
PMZ_0004534	TMEM134	scaf_00038	6732055	6746571	464.591	2.5241	0.440726	5.72613	1.03e-08	2.26e-07	TMEM134	TM134	desc=Transmembrane protein 134 (Homo sapiens)		GO:0016021
PMZ_0004554	TBK1	scaf_00022	11717983	11752272	1087.71	1.79467	0.425705	4.21531	2.49e-05	0.000194434	TBK1		desc=Serine/threonine-protein kinase TBK1 (Homo sapiens)	GO:0004672,GO:0005515,GO:0005524,GO:0006468,GO:0016772
PMZ_0004557	HYAL2	scaf_00022	11866880	11875646	7.63076	5.17165	1.27373	4.00426	6.22e-05	0.000423278	HYAL2		desc=Hyaluronidase-2 (Homo sapiens)	GO:0003824,GO:0004415,GO:0005975
PMZ_0004622	DHX57	scaf_00025	12281063	12308842	1974.74	1.38165	0.435298	3.16809	0.00153446	0.00646289	DHX57	DHX57	desc=Putative ATP-dependent RNA helicase DHX57 (Homo sapiens)	GO:0004386,GO:0005515,GO:0046872	GO:0005524
PMZ_0004784	slc12a8	scaf_00004	12975484	12989884	293.624	2.84815	0.767843	3.71631	0.000202156	0.00116008	slc12a8	S12A8	desc=Solute carrier family 12 member 8 (Xenopus laevis)	GO:0006810,GO:0016020,GO:0016021,GO:0055085	GO:0016021
PMZ_0004799	SMEK1	scaf_00036	6852675	6870309	3933.94	1.65779	0.49442	3.34854	0.000812395	0.00378345	SMEK1	PP4R3	desc=Serine/threonine-protein phosphatase 4 regulatory subunit 3A (Homo sapiens)	GO:0005488
PMZ_0004810	ANLN	scaf_00008	10142375	10161932	5475.22	2.16596	0.56351	3.84075	0.000122661	0.000759545	ANLN	ANLN	desc=Actin-binding protein anillin (Homo sapiens)		GO:0005938
PMZ_0004901	GCLC	scaf_00056	3596426	3615839	693.34	2.35109	0.727544	3.23459	0.0012182	0.005326	GCLC		desc=Glutamate--cysteine ligase catalytic subunit (Homo sapiens)	GO:0004357,GO:0006750
PMZ_0004961	RRM2	scaf_00001	5649605	5661157	10346.3	4.13638	0.608572	6.79563	1.08e-11	5.3e-10	RRM2	RIR2	desc=Ribonucleoside-diphosphate reductase subunit M2 (Homo sapiens)	GO:0009186,GO:0016491,GO:0055114	GO:0005737
PMZ_0004976	med8	scaf_00006	8204844	8210560	2075.95	1.98849	0.417864	4.76047	1.93e-06	2.12e-05	med8	MED8A	desc=Mediator of RNA polymerase II transcription subunit 8-A (Xenopus laevis)	GO:0001104,GO:0006357,GO:0016592	GO:0016592
PMZ_0005018	Hyal2	scaf_00010	9056804	9091118	653.921	1.62574	0.471511	3.44998	0.000560618	0.00276326	Hyal2	HYAL2	desc=Hyaluronidase-2 (Mus musculus)	GO:0003824,GO:0004415,GO:0005975	GO:0046658
PMZ_0005019		scaf_00010	9236792	9250110	2303.56	2.51753	0.700607	3.58947	0.000331351	0.00176246
PMZ_0005052	csnk2a1	scaf_00008	4866687	4877630	6926.8	1.49587	0.290926	5.14132	2.73e-07	3.91e-06	csnk2a1	CSK21	desc=Casein kinase II subunit alpha (Xenopus laevis)	GO:0004672,GO:0005524,GO:0006468,GO:0016772	GO:0005524
PMZ_0005053	Mc5r	scaf_00008	4828064	4829080	23.2472	3.36767	0.768847	4.34678	1.38e-05	0.000116222	Mc5r	MC5R	desc=Melanocortin receptor 5 (Rattus norvegicus)	GO:0004930,GO:0004977,GO:0007186,GO:0016021	GO:0016021
PMZ_0005155	ADRA2A	scaf_00018	2158263	2159885	20.9104	3.96316	1.0907	3.56196	0.000368098	0.00192835	ADRA2A	ADA2A	desc=Alpha-2A adrenergic receptor (Homo sapiens)	GO:0004930,GO:0007186,GO:0016021	GO:0005737
PMZ_0005183	WDR74	scaf_00088	867588	875222	1246.54	1.9293	0.620367	3.11778	0.00182221	0.00744561	WDR74		desc=WD repeat-containing protein 74 (Homo sapiens)	GO:0005515
PMZ_0005229	sae1	scaf_00025	11265214	11284715	994.289	1.77771	0.470456	3.77342	0.000161024	0.000955081	sae1	SAE1	desc=SUMO-activating enzyme subunit 1 (Danio rerio)		GO:0005829
PMZ_0005248		scaf_00052	3948172	3957555	871.088	2.89664	0.879333	3.2812	0.00103366	0.00463997		M1AP	Note=Protein of unknown function		GO:0005737
PMZ_0005288	EPHB1	scaf_00048	5907282	5994800	103.736	2.33194	0.531437	4.39208	1.12e-05	9.72e-05	EPHB1	EPHA3/EPB1B	desc=Ephrin type-B receptor 1 (Homo sapiens)	GO:0005515	GO:0030425
PMZ_0005348	DSPP	scaf_00432	39863	48875	490.991	4.946	0.915702	5.38746	7.15e-08	1.23e-06	DSPP	ZAN	desc=Dentin sialophosphoprotein (Homo sapiens)
PMZ_0005424	Usp19	scaf_00079	1247554	1277592	1288.7	3.06262	0.517807	5.90509	3.52e-09	8.73e-08	Usp19	UBP19	desc=Ubiquitin carboxyl-terminal hydrolase 19 (Rattus norvegicus)	GO:0006511,GO:0036459	GO:0005789
PMZ_0005436	TBC1D12	scaf_00015	6085112	6100564	7452.54	2.67352	0.366388	7.29782	2.92e-13	2.14e-11	TBC1D12	TBC12/TBC14	desc=TBC1 domain family member 12 (Homo sapiens)		GO:0005794
PMZ_0005442	USP38	scaf_00026	5458390	5474507	2319.32	3.13943	0.371654	8.44467	3.05e-17	4.89e-15	USP38		desc=Ubiquitin carboxyl-terminal hydrolase 38 (Homo sapiens)	GO:0006511,GO:0036459
PMZ_0005482	TOP3A	scaf_00003	2557887	2572789	1328.6	2.26329	0.462544	4.88983	1.01e-06	1.19e-05	TOP3A	TOP3A	desc=DNA topoisomerase 3-alpha (Homo sapiens)	GO:0003677,GO:0003916,GO:0003917,GO:0006265	GO:0005694
PMZ_0005656	TRAF3IP2	scaf_00034	237331	248347	107.036	4.08071	1.08056	3.76111	0.000169161	0.000997558	TRAF3IP2	CIKS	desc=Adapter protein CIKS (Homo sapiens)		GO:0001783
PMZ_0005709	Fbxo30	scaf_00050	2840867	2857615	2330.1	1.37383	0.387483	3.54119	0.000398321	0.00206001	Fbxo30	FBX30	desc=F-box only protein 30 (Rattus norvegicus)	GO:0005515	GO:0004842
PMZ_0005753	EML1	scaf_00009	17606991	17676076	1534.18	2.14913	0.573962	3.74452	0.000180739	0.00105446	EML1		desc=Echinoderm microtubule-associated protein-like 1 (Homo sapiens)	GO:0005515
PMZ_0005802	Kcnh5	scaf_00029	5437882	5457266	21.74	2.60763	0.672751	3.85776	0.00011443	0.000717961	Kcnh5	KCNH5/KCNH1	desc=Potassium voltage-gated channel subfamily H member 5 (Rattus norvegicus)	GO:0000155,GO:0000160,GO:0004871,GO:0005216,GO:0005249,GO:0005887,GO:0006811,GO:0006813,GO:0007165,GO:0008076,GO:0016020,GO:0055085,GO:0071805	GO:0005887
PMZ_0005820	RABAC1	scaf_02245	2907	18910	699.82	1.71772	0.44508	3.86031	0.000113245	0.000711212	RABAC1	PRAF1	desc=Prenylated Rab acceptor protein 1 (Canis familiaris)
PMZ_0005832	MIS18BP1	scaf_00003	16149831	16172579	1699.75	2.05975	0.325606	6.32464	2.54e-10	8.71e-09	MIS18BP1	M18BP	desc=Mis18-binding protein 1 (Homo sapiens)	GO:0003677,GO:0003682	GO:0000775
PMZ_0005864		scaf_00016	8844431	8851899	1178.27	1.96551	0.393093	5.00259	5.66e-07	7.19e-06			Note=Protein of unknown function
PMZ_0005891	wnt5b	scaf_03129	890	11906	33.6931	4.71659	0.868807	5.33616	9.49e-08	1.58e-06	wnt5b	WNT5B/WNT5A	desc=Protein Wnt-5b (Xenopus laevis)	GO:0005102,GO:0005576,GO:0007275,GO:0016055	GO:0005578
PMZ_0005919	SALL2	scaf_00004	17590844	17607546	1533.36	7.44912	0.912342	8.11102	5.02e-16	6.33e-14	SALL2	SALL1	desc=Sal-like protein 2 (Homo sapiens)	GO:0003676,GO:0046872	GO:0000792
PMZ_0005930	ASH2L	scaf_00038	3083386	3114203	3402.73	2.33634	0.545975	4.27373	1.92e-05	0.000155006	ASH2L	ASH2L	desc=Set1/Ash2 histone methyltransferase complex subunit ASH2 (Homo sapiens)	GO:0005515	GO:0035097
PMZ_0005939	Lingo1	scaf_00031	7248824	7250720	45.726	3.21326	1.03885	3.08426	0.00204057	0.00816437	Lingo1	LIGO1/LIGO2	desc=Leucine-rich repeat and immunoglobulin-like domain-containing nogo receptor-interacting protein 1 (Mus musculus)	GO:0005515	GO:0016021
PMZ_0005978	KCNMB3	scaf_00048	6602470	6606832	20.1993	3.87278	0.962494	3.94436	8e-05	0.000527228	KCNMB3	KCMB3	desc=Calcium-activated potassium channel subunit beta-3 (Homo sapiens)	GO:0006813,GO:0015269,GO:0016020	GO:0005887
PMZ_0005991	ZNF233	scaf_00006	622869	634758	947.068	1.9831	0.619799	3.19932	0.00137751	0.00590425	ZNF233	ZN233/ZN420	desc=Zinc finger protein 233 (Homo sapiens)	GO:0003676,GO:0046872	GO:0005634
PMZ_0006099	TRMT44	scaf_00015	11123720	11134685	877.051	3.02178	0.449464	6.7256	1.75e-11	8.15e-10	TRMT44	TRM44	desc=Probable tRNA (uracil-O(2)-)-methyltransferase (Homo sapiens)		GO:0005737
PMZ_0006106	cpt2	scaf_00061	2969952	2977513	331.267	1.97099	0.61677	3.19413	0.00140253	0.005993	cpt2	CPT2	desc=Carnitine O-palmitoyltransferase 2%2C mitochondrial (Xenopus tropicalis)	GO:0016746	GO:0005743
PMZ_0006138		scaf_00009	10620315	10632864	533.95	2.48178	0.800107	3.09942	0.00193901	0.00783714
PMZ_0006169	slc39a10	scaf_00004	11299908	11311215	6132.78	2.21625	0.495446	4.4732	7.71e-06	7.02e-05	slc39a10	S39AA	desc=Zinc transporter ZIP10 (Danio rerio)	GO:0016020,GO:0030001,GO:0046873,GO:0055085	GO:0016021
PMZ_0006215	Nploc4	scaf_00003	13195194	13219064	8094.05	2.69566	0.456118	5.90865	3.45e-09	8.59e-08	Nploc4	NPL4	desc=Nuclear protein localization protein 4 homolog (Mus musculus)	GO:0008270	GO:0005829
PMZ_0006229	ORC4	scaf_00004	7062493	7085207	988.345	2.71279	0.512015	5.30011	1.16e-07	1.87e-06	ORC4	ORC4	desc=Origin recognition complex subunit 4 (Homo sapiens)		GO:0005664
PMZ_0006230		scaf_00004	7051822	7061553	3272.88	1.75859	0.551936	3.18605	0.00144231	0.00614405				GO:0008270
PMZ_0006241	MTX3	scaf_03055	4277	10107	1962.9	3.06138	0.599514	5.10646	3.28e-07	4.54e-06	MTX3		desc=Metaxin-3 (Homo sapiens)	GO:0005741,GO:0006626
PMZ_0006244	FAM76A	scaf_00025	2088149	2098458	622.529	1.54722	0.505432	3.06113	0.00220504	0.00870743	FAM76A	FA76A	desc=Protein FAM76A (Gallus gallus)
PMZ_0006316	PIKFYVE	scaf_00005	16880130	16907410	4874.43	3.7227	0.371425	10.0233	1.2e-23	5.85e-21	PIKFYVE	FYV1	desc=1-phosphatidylinositol 3-phosphate 5-kinase (Homo sapiens)	GO:0005524,GO:0016307,GO:0046488	GO:0005911
PMZ_0006396	rnf150	scaf_00026	6763216	6771840	1240.42	2.01624	0.552688	3.64214	0.000270381	0.0014845	rnf150		desc=RING finger protein 150 (Danio rerio)
PMZ_0006441	CALR	scaf_00043	8817406	8825988	11771.8	2.18129	0.57295	3.81682	0.000135183	0.000824725	CALR	CALR	desc=Calreticulin (Chlorocebus aethiops)	GO:0005509,GO:0005515,GO:0005783,GO:0006457,GO:0051082	GO:0005829
PMZ_0006591		scaf_00007	15903405	15919758	3396.73	1.81637	0.568357	3.20344	0.00135797	0.00583082		EHD1/EHD2	Note=Protein of unknown function
PMZ_0006618	Fbxo11	scaf_00161	349697	367024	3850.4	1.76807	0.420034	4.20693	2.59e-05	0.000200891	Fbxo11		desc=F-box only protein 11 (Mus musculus)	GO:0000151,GO:0005515,GO:0008270,GO:0016567
PMZ_0006622	FAM120B	scaf_00009	1431883	1461049	239.881	2.35222	0.578834	4.06072	4.89e-05	0.000345693	FAM120B		desc=Constitutive coactivator of peroxisome proliferator-activated receptor gamma (Bos taurus)	GO:0005634
PMZ_0006659	ATP6AP1	scaf_00489	2497	7680	378.58	1.73577	0.393298	4.41052	1.03e-05	9.02e-05	ATP6AP1	VAS1	desc=V-type proton ATPase subunit S1 (Homo sapiens)	GO:0015991,GO:0016020,GO:0033180,GO:0046933,GO:0046961	GO:0070062
PMZ_0006692	TOR2A	scaf_00024	12627306	12636485	370.334	2.24971	0.526248	4.27409	1.92e-05	0.000154818	TOR2A	TOR2A/TOR3A	desc=Prosalusin (Homo sapiens)	GO:0005524	GO:0005788
PMZ_0006754	Rpp40	scaf_00033	3601403	3612726	482.125	2.19683	0.319561	6.87693	6.12e-12	3.25e-10	Rpp40	RPP40	desc=Ribonuclease P protein subunit p40 (Mus musculus)		GO:0005655
PMZ_0006767	Prr29	scaf_00005	18155473	18159327	52.1421	3.1548	0.87635	3.58158	0.00034152	0.00180764	Prr29	CU058	desc=Proline-rich protein 29 (Mus musculus)
PMZ_0006768	GARS	scaf_00005	18124463	18146017	4000.77	2.07539	0.451267	4.59919	4.24e-06	4.19e-05	GARS	SYG	desc=Glycine--tRNA ligase (Pongo abelii)	GO:0000166,GO:0004812,GO:0004820,GO:0005524,GO:0005737,GO:0006418,GO:0006426	GO:0005739
PMZ_0006787	vat1	scaf_00005	22986928	22993586	45261.1	4.96935	0.504917	9.84025	7.55e-23	3.32e-20	vat1	VAT1	desc=Synaptic vesicle membrane protein VAT-1 homolog (Danio rerio)	GO:0008270,GO:0016491,GO:0055114	GO:0048037
PMZ_0006798	Igf1r	scaf_00006	12272463	12315978	1035.61	1.66121	0.353589	4.69692	2.64e-06	2.77e-05	Igf1r	IGF1R	desc=Insulin-like growth factor 1 receptor (Rattus norvegicus)	GO:0004672,GO:0004713,GO:0004714,GO:0005515,GO:0005524,GO:0006468,GO:0007169,GO:0016020,GO:0016772	GO:0005901
PMZ_0006820	wsb1	scaf_00038	648545	675682	2516.15	1.29026	0.375317	3.44084	0.000579914	0.00284178	wsb1	WSB1	desc=WD repeat and SOCS box-containing protein 1 (Danio rerio)	GO:0005515,GO:0035556	GO:0035556
PMZ_0006839	Ube4a	scaf_00030	6821039	6845584	858.106	1.96856	0.560947	3.50605	0.000454816	0.00230554	Ube4a		desc=Ubiquitin conjugation factor E4 A (Mus musculus)	GO:0000151,GO:0004842,GO:0006511,GO:0016567,GO:0034450
PMZ_0006870	DCP1B	scaf_00027	7762848	7797893	4835.36	1.50813	0.361776	4.17	3.05e-05	0.000230678	DCP1B		desc=mRNA-decapping enzyme 1B (Bos taurus)	GO:0006396,GO:0008452
PMZ_0006879	OR2AT4	scaf_00051	315749	316732	62.3493	7.5753	0.948984	7.45272	9.14e-14	7.28e-12	OR2AT4	OR3A1	desc=Olfactory receptor 2AT4 (Homo sapiens)	GO:0004930,GO:0004984,GO:0007186,GO:0016021	GO:0016021
PMZ_0006881	OR2AT4	scaf_00051	349771	350754	39.6109	6.88794	0.98863	6.54838	5.82e-11	2.39e-09	OR2AT4	OR3A1/OR5V1	desc=Olfactory receptor 2AT4 (Homo sapiens)	GO:0004930,GO:0004984,GO:0007186,GO:0016021	GO:0016021
PMZ_0006888	cep170b	scaf_00025	3619383	3630561	298.248	2.57207	0.67269	3.81455	0.000136431	0.000831035	cep170b	C170B	desc=Centrosomal protein of 170 kDa protein B (Xenopus laevis)		GO:0005737
PMZ_0006892	CNOT1	scaf_00008	18160808	18192346	35907	1.43655	0.396997	3.61547	0.000299799	0.00161812	CNOT1	CNOT1	desc=CCR4-NOT transcription complex subunit 1 (Homo sapiens)		GO:0030014
PMZ_0006939	AHSA2	scaf_00036	5694465	5723795	10729.4	5.19063	0.408547	12.7071	5.4e-37	2.1e-33	AHSA2	AHSA1	desc=Activator of 90 kDa heat shock protein ATPase homolog 2 (Homo sapiens)	GO:0001671,GO:0005509,GO:0005515,GO:0006950,GO:0051087	GO:0005737
PMZ_0006963	ACSL6	scaf_00012	5794940	5856284	2821.54	1.67322	0.462625	3.61642	0.0002987	0.00161332	ACSL6	ACSL1	desc=Long-chain-fatty-acid--CoA ligase 6 (Homo sapiens)	GO:0003824,GO:0005542,GO:0008152,GO:0008270,GO:0016740	GO:0005789
PMZ_0006997	prorsd1p	scaf_00029	9812894	9817971	384.265	1.64465	0.426088	3.86244	0.000112261	0.000705463	prorsd1p	PRXD1	desc=Prolyl-tRNA synthetase associated domain-containing protein 1 (Xenopus laevis)	GO:0002161	GO:0002161
PMZ_0007064	Pdcd5	scaf_00033	10236242	10238815	736.235	2.17232	0.538657	4.03064	5.56e-05	0.00038491	Pdcd5	PDCD5	desc=Programmed cell death protein 5 (Mus musculus)	GO:0003677	GO:0005737
PMZ_0007074	FBXW7	scaf_00026	11237185	11266060	650.672	1.65059	0.421311	3.91565	9.02e-05	0.000584898	FBXW7		desc=F-box/WD repeat-containing protein 7 (Bos taurus)	GO:0005515
PMZ_0007086	HTR3A	scaf_00030	5994073	6000119	49.049	5.30328	1.04612	4.90795	9.2e-07	1.1e-05	HTR3A		desc=5-hydroxytryptamine receptor 3A (Homo sapiens)	GO:0006811,GO:0016020,GO:0016021
PMZ_0007118	Cers6	scaf_00016	12287019	12305130	3076.49	1.54697	0.419977	3.68029	0.00023297	0.00130647	Cers6	CERS6	desc=Ceramide synthase 6 (Mus musculus)	GO:0003677,GO:0005783,GO:0016021	GO:0005789
PMZ_0007175	Nmur2	scaf_00067	863214	868606	68.4581	5.80225	1.10701	5.10978	3.23e-07	4.48e-06	Nmur2		desc=Neuromedin-U receptor 2 (Mus musculus)	GO:0001607,GO:0004930,GO:0007186,GO:0016021
PMZ_0007186	wdr24	scaf_00024	1475499	1513062	4453.71	2.03663	0.377671	5.3918	6.98e-08	1.2e-06	wdr24	WDR24	desc=WD repeat-containing protein 24 (Xenopus laevis)	GO:0003723,GO:0004809,GO:0005515,GO:0008033,GO:0046872
PMZ_0007189	IKBKB	scaf_00024	1553569	1625495	797.452	1.99331	0.453731	4.39284	1.12e-05	9.69e-05	IKBKB	IKKB	desc=Inhibitor of nuclear factor kappa-B kinase subunit beta (Homo sapiens)	GO:0004672,GO:0005515,GO:0005524,GO:0006468,GO:0016772	GO:0035631
PMZ_0007200	NPC1	scaf_00001	644192	717855	2853.12	1.61744	0.484618	3.3386	0.000842003	0.00389241	NPC1	NPC1	desc=Niemann-Pick C1 protein (Sus scrofa)	GO:0016021	GO:0005783
PMZ_0007258	ANKRD9	scaf_00003	17670973	17672548	13.76	2.63394	0.828058	3.15977	0.00157896	0.00661448	ANKRD9	ANKR9	desc=Ankyrin repeat domain-containing protein 9 (Homo sapiens)	GO:0005515
PMZ_0007261	RHPN2	scaf_00045	3298408	3352754	516.172	2.60195	0.852356	3.05484	0.00225177	0.00885502	RHPN2	RHPN2/RHN2A	desc=Rhophilin-2 (Homo sapiens)	GO:0005515,GO:0007165	GO:0048471
PMZ_0007288	Ruvbl1	scaf_00027	5364368	5378355	4076.17	1.95384	0.472406	4.12996	3.63e-05	0.000267275	Ruvbl1		desc=RuvB-like 1 (Mus musculus)	GO:0003678,GO:0005524,GO:0043141
PMZ_0007289	EEFSEC	scaf_00027	5318792	5357237	705.496	3.22146	0.493767	6.51913	7.07e-11	2.87e-09	EEFSEC		desc=Selenocysteine-specific elongation factor (Homo sapiens)	GO:0003924,GO:0005525
PMZ_0007432	ercc6l	scaf_00007	10812194	10829810	2139.79	3.30297	0.693795	4.75812	1.95e-06	2.14e-05	ercc6l	ERC6L	desc=DNA excision repair protein ERCC-6-like (Danio rerio)	GO:0003677,GO:0005524	GO:0000777
PMZ_0007445	RIPK4	scaf_00008	11386680	11421643	1180.76	2.72977	0.502621	5.43055	5.62e-08	9.96e-07	RIPK4	RIPK4	desc=Receptor-interacting serine/threonine-protein kinase 4 (Homo sapiens)	GO:0004672,GO:0005524,GO:0006468,GO:0016772	GO:0005737
PMZ_0007515	PARP16	scaf_00006	13137262	13142891	745.068	1.81076	0.300089	6.03661	1.57e-09	4.33e-08	PARP16	PAR16	desc=Mono [ADP-ribose] polymerase PARP16 (Homo sapiens)	GO:0003950	GO:0005789
PMZ_0007560	NAGA	scaf_00019	2778244	2790775	4261.58	3.08338	0.461224	6.69151	2.21e-11	1e-09	NAGA	GAB	desc=Alpha-N-acetylgalactosaminidase (Gallus gallus)	GO:0003824,GO:0004553,GO:0005975	GO:0005764
PMZ_0007599	Hps1	scaf_00001	20258494	20262067	1453.92	4.27282	0.432228	9.88446	4.86e-23	2.2e-20	Hps1	HPS1	desc=Hermansky-Pudlak syndrome 1 protein homolog (Mus musculus)		GO:0031085
PMZ_0007620	Acot11	scaf_00023	1701040	1720886	316.033	2.63649	0.457802	5.75865	8.48e-09	1.9e-07	Acot11	ACO11	desc=Acyl-coenzyme A thioesterase 11 (Mus musculus)	GO:0008289	GO:0005737
PMZ_0007629	wdr91	scaf_00012	11774019	11790077	373.744	2.60005	0.743432	3.49214	0.00047916	0.00241257	wdr91	WDR91	desc=WD repeat-containing protein 91 (Danio rerio)	GO:0005515
PMZ_0007634		scaf_00012	11624205	11639640	79.5128	5.37992	0.890772	5.96304	2.48e-09	6.46e-08		FIBA2	Note=Similar to Fibrinogen alpha-2 chain (Petromyzon marinus)	GO:0005102,GO:0005577,GO:0007165,GO:0030168,GO:0030674,GO:0051258	GO:0005577
PMZ_0007808	PARP14	scaf_00004	15667754	15686871	5784.61	2.60903	0.600857	4.33283	1.47e-05	0.000122778	PARP14	PAR15	desc=Poly [ADP-ribose] polymerase 14 (Homo sapiens)	GO:0003950	GO:0005634
PMZ_0007931	CDC6	scaf_00004	6361454	6385283	870.961	2.61273	0.663427	3.93566	8.3e-05	0.000543046	CDC6	CDC6	desc=Cell division control protein 6 homolog (Homo sapiens)		GO:0005737
PMZ_0007945	PDCD11	scaf_00018	6536325	6575085	1877.06	2.33542	0.491699	4.75064	2.03e-06	2.21e-05	PDCD11	RRP5	desc=Protein RRP5 homolog (Bos taurus)	GO:0003676,GO:0005515,GO:0005622,GO:0005634,GO:0006396,GO:0006397	GO:0005829
PMZ_0007982	E2F7	scaf_00014	9318763	9346351	4004.68	2.41479	0.610305	3.95375	7.69e-05	0.000509358	E2F7		desc=Transcription factor E2F7 (Bos taurus)	GO:0003700,GO:0005667,GO:0006355,GO:0008270
PMZ_0007985	GOLT1B	scaf_00014	9311468	9316873	2311.05	2.23781	0.543932	4.11553	3.86e-05	0.000282948	GOLT1B		desc=Vesicle transport protein GOT1B (Bos taurus)	GO:0016192
PMZ_0008007	CCNB2	scaf_00006	6983010	6990569	26225.9	5.66828	0.627744	9.03217	1.68e-19	3.67e-17	CCNB2	CCNB2	desc=G2/mitotic-specific cyclin-B2 (Gallus gallus)	GO:0005634	GO:0005813
PMZ_0008023	STX11	scaf_00050	4704383	4717679	824.103	4.24193	0.577868	7.3501	1.98e-13	1.49e-11	STX11	STX11	desc=Syntaxin-11 (Homo sapiens)	GO:0005515,GO:0005794,GO:0016020,GO:0016192	GO:0005794
PMZ_0008104	ASL	scaf_00027	448109	477883	5189.03	2.83916	0.484514	5.86522	4.49e-09	1.08e-07	ASL		desc=Argininosuccinate lyase (Lithobates catesbeiana)	GO:0003824,GO:0005515
PMZ_0008148	mau2	scaf_00206	149053	171230	403.464	2.67545	0.424749	6.29679	3.04e-10	1.03e-08	mau2	SCC4	desc=MAU2 chromatid cohesion factor homolog (Xenopus tropicalis)	GO:0005515	GO:0000785
PMZ_0008219	aurkb	scaf_00045	8581582	8591535	6346.02	2.18709	0.470766	4.64334	3.43e-06	3.51e-05	aurkb	AUKBA	desc=Aurora kinase B-A (Xenopus laevis)	GO:0004672,GO:0005524,GO:0006468,GO:0007049,GO:0016772	GO:0000785
PMZ_0008296		scaf_00103	967492	973228	37.7035	3.46378	0.90177	3.82422	0.000131188	0.000803633		LYG	Note=Similar to Lysozyme g (Casuarius casuarius)	GO:0003796,GO:0009253,GO:0016998	GO:0003796
PMZ_0008326	gpatch4	scaf_00240	142689	150391	500.918	1.58977	0.487467	3.26697	0.00108705	0.00483909	gpatch4	GPTC4	desc=G patch domain-containing protein 4 (Xenopus tropicalis)	GO:0003676	GO:0003676
PMZ_0008372	tmem129	scaf_00015	6462035	6473806	2495.04	1.6376	0.471838	3.47257	0.00051551	0.002565	tmem129	TM129	desc=E3 ubiquitin-protein ligase TM129 (Xenopus tropicalis)		GO:0005789
PMZ_0008393	RPE	scaf_00016	1301891	1310676	6161.53	2.16729	0.491569	4.41106	1.03e-05	9.01e-05	RPE	RPE	desc=Ribulose-phosphate 3-epimerase (Homo sapiens)	GO:0003824,GO:0004750,GO:0005975,GO:0006098,GO:0008152,GO:0016857	GO:0005829
PMZ_0008396	fut11	scaf_00013	13688447	13694294	713.819	4.24569	0.613685	6.92007	4.51e-12	2.52e-10	fut11	FUT11	desc=Alpha-(1%2C3)-fucosyltransferase 11 (Xenopus tropicalis)	GO:0000139,GO:0006486,GO:0008417,GO:0016020,GO:0046920	GO:0032580
PMZ_0008397	glmp	scaf_00013	13698537	13704148	4187.02	3.06043	0.507244	6.04015	1.54e-09	4.24e-08	glmp	GLMPB	desc=Glycosylated lysosomal membrane protein A (Xenopus laevis)
PMZ_0008403	ARL4A	scaf_00016	11553372	11587991	231.815	2.39175	0.629752	3.8013	0.000143936	0.00086858	ARL4A	ARL4C	desc=ADP-ribosylation factor-like protein 4A (Bos taurus)	GO:0005525,GO:0005622,GO:0006886,GO:0007264,GO:0015031	GO:0005737
PMZ_0008419	Cdyl	scaf_00020	13593018	13625393	2821.22	1.38122	0.414762	3.32431	0.000886373	0.00406371	Cdyl	CDYL	desc=Chromodomain Y-like protein (Mus musculus)	GO:0003824,GO:0008152	GO:0005634
PMZ_0008462	GALNT3	scaf_00005	19539033	19568765	174.479	2.64081	0.544755	4.85044	1.23e-06	1.42e-05	GALNT3	GALT3	desc=Polypeptide N-acetylgalactosaminyltransferase 3 (Homo sapiens)		GO:0070062
PMZ_0008463	GORASP2	scaf_00005	19567121	19579716	375.298	2.21968	0.486266	4.56439	5.01e-06	4.84e-05	GORASP2	GORS2	desc=Golgi reassembly-stacking protein 2 (Homo sapiens)		GO:0005794
PMZ_0008472	PPIL2	scaf_00007	7549682	7603215	2126.22	1.3295	0.336978	3.94531	7.97e-05	0.000525322	PPIL2	PPIL2	desc=Peptidyl-prolyl cis-trans isomerase-like 2 (Homo sapiens)	GO:0000413,GO:0003755,GO:0004842,GO:0006457,GO:0016567	GO:0005737
PMZ_0008473	PPWD1	scaf_00023	5043394	5062114	1368.66	1.40131	0.424058	3.30512	0.000949374	0.0043108	PPWD1	PPWD1	desc=Peptidylprolyl isomerase domain and WD repeat-containing protein 1 (Bos taurus)	GO:0000413,GO:0003755,GO:0005515,GO:0006457	GO:0071013
PMZ_0008475	LRRC40	scaf_00023	4900787	4906617	438.003	1.74378	0.55115	3.16241	0.00156466	0.00656166	LRRC40	LRC40	desc=Leucine-rich repeat-containing protein 40 (Gallus gallus)	GO:0005515
PMZ_0008518	Txlna	scaf_00058	2670477	2678463	1837.93	1.54581	0.335692	4.60357	4.15e-06	4.12e-05	Txlna		desc=Alpha-taxilin (Mus musculus)	GO:0019905
PMZ_0008519	Syap1	scaf_00058	2647341	2660912	1573.64	1.44114	0.311769	4.62278	3.79e-06	3.82e-05	Syap1		desc=Synapse-associated protein 1 (Mus musculus)
PMZ_0008553	TEX10	scaf_00004	13670059	13712033	1989.91	2.48176	0.492268	5.04621	4.51e-07	5.96e-06	TEX10	TEX10	desc=Testis-expressed sequence 10 protein (Pongo abelii)	GO:0005488	GO:0016021
PMZ_0008562	Dnm1l	scaf_00022	4978700	5003112	2369.17	1.76209	0.485791	3.62376	0.000290353	0.00157589	Dnm1l		desc=Dynamin-1-like protein (Mus musculus)	GO:0000266,GO:0003924,GO:0005525,GO:0016559
PMZ_0008568	slc20a1a	scaf_00018	3019142	3038009	5278.05	2.76611	0.524708	5.27159	1.35e-07	2.13e-06	slc20a1a	S20A2/S20AA	desc=Sodium-dependent phosphate transporter 1-A (Danio rerio)	GO:0005315,GO:0006817,GO:0016020	GO:0016021
PMZ_0008587	AGAP1	scaf_00035	6044621	6112205	740.046	2.48179	0.543339	4.5618	5.07e-06	4.89e-05	AGAP1		desc=Arf-GAP with GTPase%2C ANK repeat and PH domain-containing protein 1 (Homo sapiens)	GO:0005096,GO:0005525,GO:0007165,GO:0007264,GO:0015031,GO:0016020
PMZ_0008628	CDK14	scaf_00004	1356117	1382947	173.561	3.2613	0.601413	5.42394	5.83e-08	1.02e-06	CDK14	CDK14	desc=Cyclin-dependent kinase 14 (Oryctolagus cuniculus)	GO:0004672,GO:0005524,GO:0006468,GO:0016772	GO:0000308
PMZ_0008702	OSBPL6	scaf_00005	15201599	15251181	1003	1.45147	0.329536	4.40456	1.06e-05	9.25e-05	OSBPL6	OSBL6	desc=Oxysterol-binding protein-related protein 6 (Homo sapiens)		GO:0005829
PMZ_0008726	PSMC5	scaf_00028	2390968	2400678	12064.3	1.83493	0.485814	3.77112	0.000162515	0.000962751	PSMC5	PRS8	desc=26S protease regulatory subunit 8 (Bos taurus)	GO:0005524,GO:0005737,GO:0016787,GO:0030163	GO:0005737
PMZ_0008761		scaf_00004	3950139	3958855	675.234	1.89668	0.349992	5.42549	5.78e-08	1.02e-06		F207A
PMZ_0008779	Piwil2	scaf_00012	7646784	7675730	878.238	3.01197	0.538869	5.58125	2.39e-08	4.68e-07	Piwil2	PIWL2	desc=Piwi-like protein 2 (Mus musculus)	GO:0003676,GO:0005515	GO:0005737
PMZ_0008801		scaf_00038	2261619	2267940	193.681	5.34619	0.765757	6.9492	3.67e-12	2.11e-10
PMZ_0008822	Iws1	scaf_00051	7536491	7552793	1119.83	1.61263	0.397878	4.05134	5.09e-05	0.0003575	Iws1	IWS1	desc=Protein IWS1 homolog (Rattus norvegicus)	GO:0003677,GO:0005634,GO:0006351	GO:0005737
PMZ_0008858	BTBD9	scaf_00029	5916877	5924470	1962.98	1.68781	0.405208	4.16787	3.07e-05	0.000232388	BTBD9	BTBD9	desc=BTB/POZ domain-containing protein 9 (Homo sapiens)	GO:0005515	GO:0008344
PMZ_0008902	Lingo2	scaf_00013	313755	315605	92.7665	3.14714	0.848913	3.6933	0.00022136	0.00125362	Lingo2	LIGO2/LIGO1	desc=Leucine-rich repeat and immunoglobulin-like domain-containing nogo receptor-interacting protein 2 (Mus musculus)	GO:0005515	GO:0016021
PMZ_0008975	D10Wsu102e	scaf_00236	47784	56239	371.532	2.24441	0.456859	4.91147	9.04e-07	1.08e-05	D10Wsu102e		desc=Uncharacterized protein C12orf45 homolog (Mus musculus)
PMZ_0009109	BMS1	scaf_00024	4832792	4844362	843.795	2.34815	0.580492	4.04163	5.31e-05	0.000370232	BMS1	BMS1	desc=Ribosome biogenesis protein BMS1 homolog (Homo sapiens)	GO:0003924,GO:0005525,GO:0005634,GO:0042254	GO:0005730
PMZ_0009110	FOXA2	scaf_00029	7171891	7174627	255.42	8.72538	1.03194	7.99012	1.35e-15	1.5e-13	FOXA2	FOXA3/FXA1A	desc=Hepatocyte nuclear factor 3-beta (Homo sapiens)	GO:0003700,GO:0006355,GO:0043565	GO:0005634
PMZ_0009157	edem3	scaf_00024	3324105	3398498	1184.87	1.52738	0.462065	3.30346	0.00095501	0.00433436	edem3	EDEM3	desc=ER degradation-enhancing alpha-mannosidase-like protein 3 (Xenopus laevis)	GO:0004571,GO:0005509,GO:0008152,GO:0016020,GO:0016787	GO:0005788
PMZ_0009161	STAMBP	scaf_00012	11725461	11755604	3256.85	1.98539	0.372318	5.33149	9.74e-08	1.61e-06	STAMBP	STABP	desc=STAM-binding protein (Homo sapiens)		GO:0032154
PMZ_0009228	TDRD9	scaf_00025	8449020	8483715	254.848	2.50956	0.569909	4.39974	1.08e-05	9.44e-05	TDRD9	SPNE	desc=Putative ATP-dependent RNA helicase TDRD9 (Homo sapiens)	GO:0004386	GO:0005737
PMZ_0009268	Tsn	scaf_00100	303132	308687	2048.37	2.59307	0.39583	6.55059	5.73e-11	2.37e-09	Tsn	TSN	desc=Translin (Mus musculus)	GO:0043565	GO:0005634
PMZ_0009269	gjc1	scaf_00005	24387573	24393087	696.658	3.06374	0.511988	5.97495	2.3e-09	6.05e-08	gjc1	CXG1	desc=Gap junction gamma-1 protein (Xenopus tropicalis)	GO:0005922,GO:0007154	GO:0005922
PMZ_0009308	TMEM167B	scaf_00120	391166	395414	1395.22	2.52881	0.489227	5.17074	2.33e-07	3.4e-06	TMEM167B		desc=Protein kish-B (Bos taurus)
PMZ_0009324	CPEB1	scaf_00052	1542068	1552948	1493.22	5.16036	0.783624	6.58723	4.48e-11	1.91e-09	CPEB1	CPEB1	desc=Cytoplasmic polyadenylation element-binding protein 1 (Pongo abelii)	GO:0000166	GO:0030054
PMZ_0009328	WDR41	scaf_00052	1666971	1683759	1433.45	1.9653	0.502259	3.91049	9.21e-05	0.000595021	WDR41	WDR41	desc=WD repeat-containing protein 41 (Homo sapiens)	GO:0005515	GO:0005765
PMZ_0009341	HAUS6	scaf_00031	1700522	1716288	4637.57	3.76264	0.543916	6.91406	4.71e-12	2.62e-10	HAUS6	HAUS6	desc=HAUS augmin-like complex subunit 6 (Homo sapiens)	GO:0051225,GO:0051297,GO:0070652	GO:0005813
PMZ_0009373	FAM129A	scaf_00024	5961544	5998163	420.027	3.74625	0.748668	5.00575	5.56e-07	7.09e-06	FAM129A	NIBL1	desc=Protein Niban (Homo sapiens)		GO:0015629
PMZ_0009393	FDFT1	scaf_00002	4656903	4680600	1771.9	2.35215	0.500406	4.70224	2.57e-06	2.72e-05	FDFT1	FDFT	desc=Squalene synthase (Homo sapiens)	GO:0009058,GO:0016740,GO:0016765	GO:0005789
PMZ_0009404		scaf_00050	3640217	3645630	5331.99	1.56537	0.421225	3.7144	0.000203683	0.00116781		AKIR1	Note=Protein of unknown function		GO:0005634
PMZ_0009442	UGT1A5	scaf_00019	9550408	9556650	62.5765	2.59625	0.790609	3.28351	0.00102523	0.00460679	UGT1A5	UD16/UD2B4	desc=UDP-glucuronosyltransferase 1-5 (Homo sapiens)	GO:0008152,GO:0016758	GO:0005789
PMZ_0009488	Rnf19a	scaf_00002	20634	77250	11579.8	1.45545	0.347399	4.18912	2.8e-05	0.000215263	Rnf19a	RN19A	desc=E3 ubiquitin-protein ligase RNF19A (Mus musculus)	GO:0003677,GO:0005515,GO:0005634,GO:0006351,GO:0006355,GO:0008270,GO:0016021	GO:0005737
PMZ_0009490	CPSF3	scaf_00002	174358	188816	3926.51	1.94176	0.633326	3.06242	0.00219555	0.00867545	CPSF3	CPSF3	desc=Cleavage and polyadenylation specificity factor subunit 3 (Bos taurus)	GO:0005509	GO:0005847
PMZ_0009509		scaf_00012	7134172	7159211	2118.79	3.74694	0.660262	5.67895	1.36e-08	2.88e-07
PMZ_0009529		scaf_00045	8264846	8276481	828.511	1.80744	0.368478	4.90429	9.38e-07	1.12e-05		CP087/CE087
PMZ_0009603	Tmem132d	scaf_00007	5798171	5799019	46.8081	5.50942	1.15399	4.60153	4.19e-06	4.15e-05	Tmem132d	T132E/T132D	desc=Transmembrane protein 132D (Mus musculus)		GO:0016021
PMZ_0009670	Mmp24	scaf_00045	8680392	8702084	209.361	2.5208	0.619155	4.07082	4.68e-05	0.000333711	Mmp24	MMP24	desc=Matrix metalloproteinase-24 (Mus musculus)	GO:0004222,GO:0005887,GO:0006508,GO:0008237,GO:0008270,GO:0031012	GO:0070062
PMZ_0009782	Celf2	scaf_00087	1178011	1232104	2744.27	1.89453	0.530433	3.5722	0.000353995	0.0018633	Celf2	CEL1A	desc=CUGBP Elav-like family member 2 (Mus musculus)	GO:0000166,GO:0003676	GO:0005737
PMZ_0009783	UTP20	scaf_00014	314368	377119	1843.58	3.02506	0.651222	4.6465	3.38e-06	3.47e-05	UTP20		desc=Small subunit processome component 20 homolog (Homo sapiens)	GO:0005488
PMZ_0009871	GID8	scaf_00003	9000322	9003818	3686.2	2.5681	0.535956	4.78583	1.7e-06	1.9e-05	GID8	GID8	desc=Glucose-induced degradation protein 8 homolog (Homo sapiens)	GO:0005515	GO:0030054
PMZ_0009872	Dnajc5	scaf_00003	9013744	9045468	403.052	1.83058	0.378215	4.83897	1.31e-06	1.49e-05	Dnajc5	DNJC5	desc=DnaJ homolog subfamily C member 5 (Mus musculus)		GO:0070062
PMZ_0009874	OSBPL2	scaf_00003	8113464	8139268	885.953	2.96801	0.415165	7.14784	8.82e-13	5.84e-11	OSBPL2	OSBL1	desc=Oxysterol-binding protein-related protein 2 (Homo sapiens)		GO:0005770
PMZ_0009880	Ctsa	scaf_00276	102682	123300	2063.6	1.28538	0.36075	3.56535	0.000363373	0.00190513	Ctsa	PPGB	desc=Lysosomal protective protein (Mus musculus)	GO:0004185,GO:0006508	GO:0070062
PMZ_0009901	VPS72	scaf_00013	3443032	3450596	1801.86	3.25368	0.339873	9.57492	1.02e-21	3.54e-19	VPS72	VPS72	desc=Vacuolar protein sorting-associated protein 72 homolog (Pongo abelii)	GO:0005634,GO:0006355	GO:0005634
PMZ_0009915	rps6	scaf_00043	2983111	3018922	4387.11	1.84875	0.586765	3.14285	0.00167311	0.0069395	rps6	RS6	desc=40S ribosomal protein S6 (Oncorhynchus mykiss)	GO:0003735,GO:0005622,GO:0005840,GO:0006412	GO:0044297
PMZ_0009922	Tbl2	scaf_00038	3712631	3720478	971.616	1.37449	0.394219	3.48528	0.000491627	0.00246485	Tbl2	TBL2	desc=Transducin beta-like protein 2 (Mus musculus)	GO:0005515	GO:0044822
PMZ_0009925	AP1M1	scaf_00006	9614947	9645876	4002.78	1.13036	0.336322	3.35941	0.000781084	0.00366317	AP1M1	AP1M1	desc=AP-1 complex subunit mu-1 (Bos taurus)	GO:0005515,GO:0006810,GO:0006886,GO:0016192,GO:0030131	GO:0030131
PMZ_0009942	Vangl2	scaf_00115	279763	296645	130.24	2.2752	0.479207	4.74644	2.07e-06	2.25e-05	Vangl2	VANG1	desc=Vang-like protein 2 (Mus musculus)	GO:0007275,GO:0016021	GO:0016021
PMZ_0009967	Peli2	scaf_00139	129813	143999	994.564	1.89918	0.514173	3.69238	0.000222163	0.0012567	Peli2	PELI2	desc=E3 ubiquitin-protein ligase pellino homolog 2 (Mus musculus)	GO:0008063	GO:0005829
PMZ_0010003	TM9SF2	scaf_00001	17629108	17668884	981.453	1.92406	0.603815	3.18611	0.00144199	0.00614405	TM9SF2	TM9S2	desc=Transmembrane 9 superfamily member 2 (Pongo abelii)	GO:0016021	GO:0010008
PMZ_0010014	ogfod2	scaf_00007	7121411	7127331	6585.84	4.65039	0.513549	9.05955	1.31e-19	2.92e-17	ogfod2	OGFD2	desc=2-oxoglutarate and iron-dependent oxygenase domain-containing protein 2 (Danio rerio)	GO:0005506,GO:0016491,GO:0016705,GO:0016706,GO:0031418,GO:0055114	GO:0005506
PMZ_0010046	MTERF1	scaf_00028	8033086	8035129	439.408	1.64589	0.420258	3.91766	8.94e-05	0.000581089	MTERF1	MTEF1	desc=Transcription termination factor 1%2C mitochondrial (Homo sapiens)	GO:0003690,GO:0005739,GO:0006355	GO:0005759
PMZ_0010047	Nop58	scaf_00028	8019000	8030805	6140.14	1.49231	0.348582	4.285	1.83e-05	0.000148587	Nop58	NOP58	desc=Nucleolar protein 58 (Mus musculus)		GO:0005730
PMZ_0010060	eral1	scaf_00073	2999204	3043545	739.52	1.96806	0.302529	6.5059	7.72e-11	3.08e-09	eral1	ERAL1	desc=GTPase Era%2C mitochondrial (Danio rerio)	GO:0004672,GO:0005524,GO:0005622,GO:0006468,GO:0008270,GO:0016772	GO:0005743
PMZ_0010126	Txnrd3	scaf_00042	4650311	4672828	2316.18	2.46956	0.802414	3.07726	0.0020891	0.00831573	Txnrd3	TRXR3	desc=Thioredoxin reductase 3 (Mus musculus)	GO:0009055,GO:0015035,GO:0016491,GO:0016668,GO:0045454,GO:0050660,GO:0055114	GO:0005783
PMZ_0010183	TRIM59	scaf_00055	3221016	3223336	81.3402	3.6491	0.999541	3.63798	0.000274786	0.00150613	TRIM59	TRI59	desc=Tripartite motif-containing protein 59 (Gallus gallus)	GO:0005515,GO:0005622,GO:0008270	GO:0016021
PMZ_0010193	emc3	scaf_00027	525176	531068	912.401	1.63942	0.521071	3.14702	0.00164942	0.006852	emc3		desc=ER membrane protein complex subunit 3 (Danio rerio)	GO:0016020
PMZ_0010213	Dyrk2	scaf_00027	167571	175345	2072.53	1.98229	0.511546	3.8715	0.000108167	0.000683299	Dyrk2		desc=Dual specificity tyrosine-phosphorylation-regulated kinase 2 (Mus musculus)	GO:0004672,GO:0005524,GO:0006468,GO:0016772
PMZ_0010247	Akap6	scaf_00029	4846557	4871201	275.565	3.94089	0.753465	5.23448	1.65e-07	2.54e-06	Akap6	AKAP6	desc=A-kinase anchor protein 6 (Rattus norvegicus)	GO:0016021	GO:0005901
PMZ_0010318	MGAT4C	scaf_00014	3592336	3597387	360.686	2.81019	0.913048	3.08361	0.00204503	0.00817768	MGAT4C		desc=Alpha-1%2C3-mannosyl-glycoprotein 4-beta-N-acetylglucosaminyltransferase C (Sus scrofa)	GO:0005975,GO:0016020,GO:0016758
PMZ_0010331	Fam126b	scaf_00005	10307699	10312928	4327.15	2.65296	0.49766	5.32278	1.02e-07	1.68e-06	Fam126b	F126B	desc=Protein FAM126B (Mus musculus)		GO:0005622
PMZ_0010399	Slc7a9	scaf_00020	5946520	5977735	171.546	3.92368	0.963344	4.06155	4.87e-05	0.000344845	Slc7a9	BAT1	desc=b(0%2C+)-type amino acid transporter 1 (Rattus norvegicus)	GO:0003333,GO:0015171,GO:0016020	GO:0031526
PMZ_0010418	Jmjd6	scaf_00019	8671942	8688694	1159.2	2.29652	0.341033	6.73466	1.64e-11	7.71e-10	Jmjd6	JMJD6	desc=Bifunctional arginine demethylase and lysyl-hydroxylase JMJD6 (Mus musculus)		GO:0005730
PMZ_0010464	TRHR	scaf_00008	8016217	8025067	32.8917	3.96516	1.12712	3.42307	0.000619187	0.00300544	TRHR	TRFR	desc=Thyrotropin-releasing hormone receptor (Gallus gallus)	GO:0004930,GO:0004997,GO:0007186,GO:0016021	GO:0016021
PMZ_0010468	sec23a	scaf_00033	3166026	3173951	812.254	2.75389	0.577603	4.76639	1.88e-06	2.06e-05	sec23a	SC23A	desc=Protein transport protein Sec23A (Danio rerio)	GO:0006886,GO:0006888,GO:0008270,GO:0030127	GO:0030127
PMZ_0010511	B4GALT6	scaf_00008	14139188	14164120	13682	3.17787	0.458066	6.92772	4.28e-12	2.41e-10	B4GALT6	B4GT6	desc=Beta-1%2C4-galactosyltransferase 6 (Homo sapiens)	GO:0005975,GO:0016757	GO:0032580
PMZ_0010521	Pllp	scaf_00003	11030890	11047598	1265.15	3.49265	0.864389	4.04311	5.27e-05	0.000368439	Pllp	MAL2/MALL	desc=Plasmolipin (Rattus norvegicus)		GO:0030136
PMZ_0010551	YTHDF2	scaf_00003	2109261	2122327	3832.75	2.50972	0.306497	8.18895	2.64e-16	3.53e-14	YTHDF2	YTHD2	desc=YTH domain-containing family protein 2 (Homo sapiens)		GO:0000932
PMZ_0010591	C2cd3	scaf_00021	2571365	2605324	2104.25	1.22507	0.397295	3.07859	0.00207983	0.00828394	C2cd3	C2CD3	desc=C2 domain-containing protein 3 (Mus musculus)	GO:0005515	GO:0034451
PMZ_0010624	lig1	scaf_00037	11733096	11768753	5079.62	2.26391	0.735277	3.06704	0.00216189	0.00856511	lig1	DNLI1	desc=DNA ligase 1 (Xenopus laevis)	GO:0003677,GO:0003909,GO:0003910,GO:0005524,GO:0006281,GO:0006310,GO:0051103	GO:0005634
PMZ_0010646	WDR81	scaf_00009	1060270	1096956	2955.02	1.98624	0.457597	4.34113	1.42e-05	0.000118788	WDR81		desc=WD repeat-containing protein 81 (Homo sapiens)	GO:0005515
PMZ_0010649	Fbxo46	scaf_00009	1047118	1047882	828.94	1.97132	0.428687	4.60048	4.22e-06	4.17e-05	Fbxo46		desc=F-box only protein 46 (Rattus norvegicus)	GO:0005515
PMZ_0010651	CLCN3	scaf_00003	24637979	24652896	3386.62	1.47239	0.463639	3.17743	0.00148585	0.00630188	CLCN3		desc=H(+)/Cl(-) exchange transporter 3 (Pongo abelii)	GO:0005216,GO:0005247,GO:0006821,GO:0016020,GO:0055085
PMZ_0010673	RAD51B	scaf_00009	4639222	4644385	503.923	1.77812	0.462457	3.84113	0.00012247	0.000758603	RAD51B		desc=DNA repair protein RAD51 homolog 2 (Homo sapiens)	GO:0000724,GO:0003677,GO:0006281,GO:0033063
PMZ_0010728	MFSD6	scaf_00005	13743451	13758014	4959.31	3.08688	0.443877	6.94667	3.74e-12	2.12e-10	MFSD6	MFSD6	desc=Major facilitator superfamily domain-containing protein 6 (Sus scrofa)	GO:0016021,GO:0055085	GO:0016021
PMZ_0010803	SIL1	scaf_00041	7597901	7618643	2025.28	4.69754	0.455093	10.3197	5.74e-25	3.57e-22	SIL1		desc=Nucleotide exchange factor SIL1 (Bos taurus)	GO:0005488
PMZ_0010845	TBC1D10B	scaf_00038	3054984	3068341	1340.64	1.83537	0.588143	3.11515	0.00183854	0.00750285	TBC1D10B	TB10B	desc=TBC1 domain family member 10B (Homo sapiens)		GO:0005737
PMZ_0010929	GEMIN4	scaf_00038	10107615	10114671	2262.16	2.94633	0.763346	3.85534	0.00011557	0.000723246	GEMIN4	GEMI4	desc=Gem-associated protein 4 (Homo sapiens)		GO:0005737
PMZ_0010991	POMT2	scaf_00025	8728860	8770764	674.669	2.14908	0.514061	4.18703	2.83e-05	0.000216739	POMT2	POMT2	desc=Protein O-mannosyl-transferase 2 (Homo sapiens)	GO:0000030,GO:0006493,GO:0016020	GO:0005789
PMZ_0011037	klhl12	scaf_00022	7859397	7882539	3440.81	2.35453	0.499178	4.71504	2.42e-06	2.57e-05	klhl12		desc=Kelch-like protein 12 (Xenopus laevis)	GO:0005515
PMZ_0011039	ccdc77	scaf_00022	8411136	8426008	2980.54	2.87894	0.479477	6.00008	1.97e-09	5.31e-08	ccdc77		desc=Coiled-coil domain-containing protein 77 (Xenopus laevis)
PMZ_0011079	RND3	scaf_00004	15507719	15517625	2151.05	1.22228	0.404053	3.03081	0.00243903	0.00944915	RND3	RND3	desc=Rho-related GTP-binding protein RhoE (Homo sapiens)	GO:0005525,GO:0005622,GO:0007264	GO:0005622
PMZ_0011125	cse1l	scaf_00011	8493861	8553476	5294.88	2.1519	0.416231	5.16845	2.36e-07	3.43e-06	cse1l	XPO2	desc=Exportin-2 (Xenopus laevis)	GO:0005488,GO:0005515,GO:0006886,GO:0008536	GO:0005737
PMZ_0011154	KIF2A	scaf_01477	980	14706	190.999	2.912	0.427095	6.81334	9.54e-12	4.84e-10	KIF2A	KIF2A	desc=Kinesin-like protein KIF2A (Homo sapiens)	GO:0003777,GO:0005524,GO:0005871,GO:0007018,GO:0008017	GO:0005813
PMZ_0011155	Src42A	scaf_00017	3181740	3214256	286.383	5.35658	0.755101	7.0757	1.49e-12	9.38e-11	Src42A	SRC42	desc=Tyrosine-protein kinase Src42A (Drosophila melanogaster)	GO:0004672,GO:0005515,GO:0006468,GO:0016772	GO:0005912
PMZ_0011181	KLHL18	scaf_00005	12472667	12484493	906.037	1.96177	0.361626	5.42494	5.8e-08	1.02e-06	KLHL18	KLH18	desc=Kelch-like protein 18 (Homo sapiens)	GO:0005515
PMZ_0011182	PFKP	scaf_00005	5448610	5494108	1136.77	2.93506	0.535414	5.47946	4.27e-08	7.83e-07	PFKP	PFKAP	desc=ATP-dependent 6-phosphofructokinase%2C platelet type (Homo sapiens)	GO:0003872,GO:0005524,GO:0005737,GO:0006002,GO:0006096	GO:0005829
PMZ_0011198	lmbrd1	scaf_00001	4151839	4290100	313.987	1.61224	0.521399	3.09129	0.00199287	0.00800816	lmbrd1	LMBD1	desc=Probable lysosomal cobalamin transporter (Xenopus laevis)		GO:0016021
PMZ_0011224	PDIA4	scaf_00004	11776985	11783602	15637.3	3.25524	0.521317	6.25392	4e-10	1.31e-08	PDIA4	PDIA4	desc=Protein disulfide-isomerase A4 (Homo sapiens)	GO:0005783,GO:0016853,GO:0045454	GO:0009986
PMZ_0011247	Bbs7	scaf_00026	6265513	6284355	4892.94	1.65545	0.428414	3.85622	0.000115154	0.000721105	Bbs7		desc=Bardet-Biedl syndrome 7 protein homolog (Mus musculus)
PMZ_0011296	Smurf2	scaf_00037	3301006	3324410	1094.04	1.59898	0.46846	3.41223	0.000644334	0.00310498	Smurf2	SMUF2	desc=E3 ubiquitin-protein ligase SMURF2 (Mus musculus)	GO:0004842,GO:0005515	GO:0005737
PMZ_0011368	micu1	scaf_00012	3613029	3660255	7230.7	1.8011	0.434869	4.13924	3.48e-05	0.000258544	micu1	MICU1	desc=Calcium uptake protein 1%2C mitochondrial (Xenopus tropicalis)	GO:0005509	GO:0032592
PMZ_0011375	AIM1	scaf_00001	24818204	24865041	271.813	2.36675	0.516256	4.59021	4.43e-06	4.35e-05	AIM1	AIM1/CRBG3	desc=Absent in melanoma 1 protein (Homo sapiens)		GO:0030246
PMZ_0011382	Ept1	scaf_00122	506440	532793	2275.17	1.60792	0.460023	3.49579	0.000472665	0.00238605	Ept1	EPT1	desc=Ethanolaminephosphotransferase 1 (Mus musculus)	GO:0008654,GO:0016020,GO:0016780	GO:0005789
PMZ_0011477	JKAMP	scaf_00009	8898985	8913506	2351.69	1.61938	0.475502	3.40769	0.00065516	0.00314856	JKAMP		desc=JNK1/MAPK8-associated membrane protein (Homo sapiens)
PMZ_0011482	Arhgef3	scaf_00027	5634201	5658980	1054.61	2.15425	0.568875	3.77996	0.000156857	0.000934773	Arhgef3		desc=Rho guanine nucleotide exchange factor 3 (Gallus gallus)	GO:0005089,GO:0035023
PMZ_0011536	rasef	scaf_00013	10012956	10037462	228.534	3.7861	0.672834	5.63091	1.79e-08	3.65e-07	rasef	RASEF	desc=Ras and EF-hand domain-containing protein (Xenopus tropicalis)	GO:0005525,GO:0005622,GO:0007165,GO:0007264,GO:0015031,GO:0016020	GO:0048471
PMZ_0011570	MAL2	scaf_00001	11809420	11813926	23.653	7.13529	1.13933	6.03026	1.64e-09	4.49e-08	MAL2	MAL2	desc=Protein MAL2 (Bos taurus)
PMZ_0011612	Mgat2	scaf_00009	9258321	9259646	1728.82	1.97553	0.314083	6.29073	3.16e-10	1.06e-08	Mgat2		desc=Alpha-1%2C6-mannosyl-glycoprotein 2-beta-N-acetylglucosaminyltransferase (Rattus norvegicus)	GO:0005795,GO:0008455,GO:0009312,GO:0016021
PMZ_0011618	ZMYND19	scaf_00024	7758280	7767302	2425.28	2.9448	0.44233	6.65803	2.78e-11	1.24e-09	ZMYND19	ZMY19	desc=Zinc finger MYND domain-containing protein 19 (Homo sapiens)		GO:0005737
PMZ_0011621	Msh6	scaf_00025	9436041	9448731	466.339	1.71091	0.564951	3.0244	0.00249125	0.00961887	Msh6	MSH6	desc=DNA mismatch repair protein Msh6 (Mus musculus)	GO:0005524,GO:0006298,GO:0030983	GO:0005794
PMZ_0011674	SLC25A15	scaf_00021	9877432	9891556	562.646	2.00314	0.591091	3.3877	0.000704805	0.0033556	SLC25A15	ORNT1	desc=Mitochondrial ornithine transporter 1 (Homo sapiens)		GO:0016021
PMZ_0011708	FAM13A	scaf_00012	12399329	12418713	580.006	1.52505	0.491025	3.11372	0.00184746	0.00753294	FAM13A	FA13A	desc=Protein FAM13A (Bos taurus)
PMZ_0011709	PHYHIP	scaf_00012	12389097	12396698	248.921	3.00678	0.944916	3.181	0.0014677	0.00623851	PHYHIP	PHYIP	desc=Phytanoyl-CoA hydroxylase-interacting protein (Bos taurus)	GO:0005515
PMZ_0011832	ptar1	scaf_00013	8190604	8198253	5101.25	2.45532	0.60444	4.05488	5.02e-05	0.000353155	ptar1	PTAR1	desc=Protein prenyltransferase alpha subunit repeat-containing protein 1 (Danio rerio)	GO:0008318,GO:0018342	GO:0008318
PMZ_0011876	Arhgef19	scaf_00039	5470988	5510659	667.203	4.68784	0.417521	11.23	2.91e-29	3.76e-26	Arhgef19		desc=Rho guanine nucleotide exchange factor 19 (Mus musculus)	GO:0005089,GO:0035023
PMZ_0011877	slc30a6	scaf_00039	5514412	5531038	1127.01	1.58128	0.50207	3.15017	0.00163177	0.00679323	slc30a6		desc=Zinc transporter 6 (Danio rerio)	GO:0006812,GO:0008324,GO:0016021,GO:0055085
PMZ_0011880	Polr2b	scaf_00015	2448249	2474531	2169.75	2.05923	0.572975	3.58785	0.00033341	0.00177098	Polr2b	RPB2	desc=DNA-directed RNA polymerase II subunit RPB2 (Mus musculus)	GO:0003677,GO:0003899,GO:0006351,GO:0032549	GO:0005665
PMZ_0012021		scaf_00029	10794303	10802575	444.412	1.82046	0.593208	3.06852	0.00215123	0.00853075		AP5M1	Note=Protein of unknown function		GO:0030119
PMZ_0012131	mcm8	scaf_00041	9365490	9369576	762.978	1.9629	0.645249	3.03525	0.00240333	0.00933882	mcm8		desc=DNA helicase MCM8 (Xenopus tropicalis)	GO:0003677,GO:0005524,GO:0006260
PMZ_0012150	PIKFYVE	scaf_00005	16907484	16925193	2280.71	4.67965	0.47602	9.82652	8.66e-23	3.66e-20	PIKFYVE	FYV1	desc=1-phosphatidylinositol 3-phosphate 5-kinase (Homo sapiens)	GO:0005524,GO:0035556,GO:0046872	GO:0005911
PMZ_0012153	zgc:63572	scaf_00026	6055316	6074662	4572.73	1.52906	0.43077	3.5453	0.000392166	0.00203305	zgc:63572		desc=Transmembrane protein 185-like (Danio rerio)
PMZ_0012232	STT3B	scaf_00016	13341455	13356720	7069.39	1.93383	0.337546	5.73121	9.97e-09	2.2e-07	STT3B	STT3B	desc=Dolichyl-diphosphooligosaccharide--protein glycosyltransferase subunit STT3B (Homo sapiens)	GO:0004576,GO:0006486,GO:0016020	GO:0016021
PMZ_0012293	HECTD3	scaf_00021	401961	422239	422.509	2.92872	0.840266	3.48609	0.000490132	0.00246016	HECTD3	HECD3	desc=E3 ubiquitin-protein ligase HECTD3 (Homo sapiens)	GO:0004842	GO:0005737
PMZ_0012376	Fam114a1	scaf_00011	9549667	9563171	3284.67	1.50216	0.472514	3.1725	0.00151135	0.00638215	Fam114a1	F1142	desc=Protein Noxp20 (Mus musculus)
PMZ_0012448	Slc38a2	scaf_00010	4621488	4638639	886.956	2.78958	0.667894	4.18026	2.91e-05	0.000222242	Slc38a2	S38A2	desc=Sodium-coupled neutral amino acid transporter 2 (Mus musculus)		GO:0016021
PMZ_0012500	MAN2B1	scaf_00044	4108417	4130651	446.607	1.85462	0.338798	5.47411	4.4e-08	8.04e-07	MAN2B1		desc=Lysosomal alpha-mannosidase (Bos taurus)	GO:0003824,GO:0004559,GO:0005975
PMZ_0012634	wdr37	scaf_00035	7805922	7825872	938.819	2.56677	0.541863	4.73485	2.19e-06	2.37e-05	wdr37		desc=WD repeat-containing protein 37 (Xenopus laevis)	GO:0005515
PMZ_0012743		scaf_00048	3104641	3111320	19294.8	4.21735	1.04099	4.03911	5.37e-05	0.000373554
PMZ_0012791		scaf_00016	11436269	11441772	2921.52	3.24139	0.615873	5.25829	1.45e-07	2.27e-06		CQ053	Note=Similar to Uncharacterized protein C17orf53 homolog (Mus musculus)
PMZ_0012867	zgc:55908	scaf_00002	6167642	6217992	1883.29	1.49376	0.365803	4.08197	4.47e-05	0.000320445	zgc:55908	STRUM	desc=WASH complex subunit strumpellin (Danio rerio)	GO:0003824,GO:0071203	GO:0071203
PMZ_0012925		scaf_00055	1045541	1075952	37.6933	4.33397	0.851159	5.02981	4.91e-07	6.39e-06		DMBTL		GO:0005044,GO:0016020	GO:0005576
PMZ_0012939	GALNT1	scaf_00004	13291805	13341378	1961.97	1.27469	0.339514	3.75693	0.000172008	0.00101128	GALNT1	GALT1	desc=Polypeptide N-acetylgalactosaminyltransferase 1 (Bos taurus)		GO:0005576
PMZ_0012946	ITGB5	scaf_00053	2501192	2544661	1007.82	2.59571	0.772928	3.36538	0.000764393	0.0035996	ITGB5	ITB5/ITB3	desc=Integrin beta-5 (Homo sapiens)	GO:0004872,GO:0007044,GO:0007155,GO:0007160,GO:0007229,GO:0008305,GO:0030334,GO:0060055,GO:0070527	GO:0071133
PMZ_0013021	slc38a9	scaf_00023	6126621	6147328	653.418	1.31598	0.379931	3.46021	0.000539758	0.00266925	slc38a9	S38A9	desc=Sodium-coupled neutral amino acid transporter 9 (Danio rerio)		GO:0016021
PMZ_0013024	SLC35B3	scaf_00003	2933390	2949239	897.488	2.09068	0.457065	4.57412	4.78e-06	4.64e-05	SLC35B3	S35B3	desc=Adenosine 3'-phospho 5'-phosphosulfate transporter 2 (Homo sapiens)	GO:0055085	GO:0000139
PMZ_0013096	HPS6	scaf_00015	13458741	13461683	589.446	1.61703	0.386818	4.17889	2.93e-05	0.000223236	HPS6	HPS6	desc=Hermansky-Pudlak syndrome 6 protein (Homo sapiens)		GO:0031084
PMZ_0013182	NEU1	scaf_00024	10432562	10438661	2597.9	2.29083	0.440567	5.19929	2e-07	3e-06	NEU1	NEUR1	desc=Sialidase-1 (Bos taurus)	GO:0004308	GO:0030054
PMZ_0013211	FAM199X	scaf_00021	5842023	5858622	1348.92	2.33698	0.444211	5.26222	1.42e-07	2.23e-06	FAM199X	F199X/F19XB	desc=Protein FAM199X (Homo sapiens)
PMZ_0013214	B3GNT3	scaf_00039	561983	563095	69.4975	5.50213	0.850013	6.36576	1.94e-10	6.83e-09	B3GNT3		desc=N-acetyllactosaminide beta-1%2C3-N-acetylglucosaminyltransferase 3 (Homo sapiens)	GO:0006486,GO:0008378,GO:0016020
PMZ_0013273	ABHD2	scaf_00052	6134207	6174677	396.856	1.74722	0.549509	3.17803	0.0014828	0.00629306	ABHD2	ABHD2	desc=Abhydrolase domain-containing protein 2 (Bos taurus)		GO:0016021
PMZ_0013368	yvgN	scaf_00036	6683742	6694083	2468.87	2.16737	0.345536	6.27649	3.46e-10	1.15e-08	yvgN	GR	desc=Glyoxal reductase (Bacillus subtilis (strain 168))	GO:0016491,GO:0055114	GO:0043892
PMZ_0013370	CYP3A19	scaf_00037	3859128	3866600	567.073	2.79759	0.858066	3.26069	0.0011114	0.00491888	CYP3A19	CP3A9	desc=Cytochrome P450 3A19 (Fragment) (Capra hircus aegagrus)	GO:0005506,GO:0016705,GO:0020037,GO:0055114	GO:0005789
PMZ_0013384	ZP2	scaf_00017	7865773	7900464	26255.3	5.15641	1.109	4.60927	4.04e-06	4.03e-05	ZP2	ZP2	desc=Zona pellucida sperm-binding protein 2 (Canis familiaris)
PMZ_0013449		scaf_00151	52231	56408	1307.04	2.93582	0.464414	6.32537	2.53e-10	8.69e-09		CB047	Note=Similar to Uncharacterized protein C2orf47 homolog%2C mitochondrial (Rattus norvegicus)		GO:0005739
PMZ_0013464	EXOC8	scaf_00048	6715020	6743829	4208.33	1.40541	0.420804	3.33736	0.000845781	0.00390709	EXOC8	EXOC8	desc=Exocyst complex component 8 (Gallus gallus)		GO:0005737
PMZ_0013529	CAB39	scaf_00001	21581493	21626971	919.415	2.99126	0.604907	4.9424	7.72e-07	9.4e-06	CAB39	CAB39	desc=Calcium-binding protein 39 (Bos taurus)	GO:0005488	GO:0005829
PMZ_0013550	KLHL20	scaf_00007	1290656	1308110	1348.23	1.92917	0.473662	4.06649	4.77e-05	0.000338972	KLHL20	KLH20	desc=Kelch-like protein 20 (Bos taurus)	GO:0005515	GO:0030424
PMZ_0013571	Nxph1	scaf_00016	4675804	4679630	1879.5	7.63168	1.03721	7.27874	3.37e-13	2.44e-11	Nxph1	NXPH1	desc=Neurexophilin-1 (Rattus norvegicus)		GO:0005576
PMZ_0013596	NEK2	scaf_00036	6718433	6730784	1446.42	2.63054	0.512882	5.12464	2.98e-07	4.19e-06	NEK2	NEK2	desc=Serine/threonine-protein kinase Nek2 (Homo sapiens)	GO:0004672,GO:0005524,GO:0006468,GO:0016772	GO:0005813
PMZ_0013603	Bub1	scaf_00088	26895	48660	4294.26	1.6547	0.44251	3.73715	0.000186116	0.00108095	Bub1		desc=Mitotic checkpoint serine/threonine-protein kinase BUB1 (Mus musculus)	GO:0004672,GO:0005524,GO:0006468,GO:0016772
PMZ_0013610	Pcmt1	scaf_00009	6096737	6102460	4159	2.14276	0.561529	3.81045	0.000138716	0.000843365	Pcmt1		desc=Protein-L-isoaspartate(D-aspartate) O-methyltransferase (Mus musculus)	GO:0004719,GO:0006464
PMZ_0013634	FAM160B1	scaf_00018	3234252	3244483	1631.24	1.43954	0.432108	3.33289	0.000859477	0.00396094	FAM160B1	F16B1	desc=Protein FAM160B1 (Bos taurus)
PMZ_0013635	Fnta	scaf_00018	3244476	3261828	3743.4	1.10129	0.344317	3.19833	0.00138224	0.00592062	Fnta	FNTA	desc=Protein farnesyltransferase/geranylgeranyltransferase type-1 subunit alpha (Mus musculus)	GO:0008318,GO:0018342	GO:0005953
PMZ_0013669	pkm	scaf_00052	4997672	5007219	12853.4	1.7572	0.546334	3.2107	0.00132413	0.00570824	pkm	KPYM	desc=Pyruvate kinase PKM (Xenopus laevis)	GO:0000287,GO:0003824,GO:0004743,GO:0006096,GO:0030955	GO:0005524
PMZ_0013748	TMEM251	scaf_00009	14892737	14893353	308.695	2.6688	0.462558	5.76869	7.99e-09	1.8e-07	TMEM251		desc=Transmembrane protein 251 (Homo sapiens)
PMZ_0013773	NXPE3	scaf_00032	4068038	4092302	44.7094	2.19825	0.72846	3.01686	0.00255412	0.00982451	NXPE3		desc=NXPE family member 3 (Bos taurus)
PMZ_0013815	USP22	scaf_00011	12277961	12297088	1987.99	2.00572	0.507428	3.94988	7.82e-05	0.000517153	USP22	UBP22	desc=Ubiquitin carboxyl-terminal hydrolase 22 (Bos taurus)	GO:0006511,GO:0008270,GO:0036459	GO:0000124
PMZ_0013824	PDIA5	scaf_00016	2849049	2888063	501.268	1.92239	0.607479	3.16712	0.00153959	0.00647609	PDIA5	PDIA5	desc=Protein disulfide-isomerase A5 (Bos taurus)	GO:0045454	GO:0005783
PMZ_0013870	Prmt2	scaf_00028	8183669	8206833	589.051	1.43655	0.460375	3.1223	0.00179443	0.00734757	Prmt2	ANM2	desc=Protein arginine N-methyltransferase 2 (Mus musculus)	GO:0005515,GO:0006479,GO:0008168	GO:0005737
PMZ_0013871	mfsd5	scaf_00028	8179581	8184748	287.228	2.20654	0.515557	4.2799	1.87e-05	0.000151464	mfsd5	MFSD5	desc=Molybdate-anion transporter (Xenopus tropicalis)	GO:0015098,GO:0015689,GO:0016021	GO:0016021
PMZ_0013894	RBM17	scaf_00042	5443820	5444752	171.794	1.32381	0.433834	3.05167	0.00227574	0.00893151	RBM17	SPF45	desc=Splicing factor 45 (Homo sapiens)		GO:0005737
PMZ_0013924	PLCXD1	scaf_00026	6103264	6112057	2549.5	3.11981	0.78509	3.98221	6.83e-05	0.00045893	PLCXD1		desc=PI-PLC X domain-containing protein 1 (Homo sapiens)	GO:0006629,GO:0008081
PMZ_0013931	DNAJB11	scaf_00035	2878177	2888233	2429.49	2.16612	0.499546	4.33796	1.44e-05	0.000120361	DNAJB11		desc=DnaJ homolog subfamily B member 11 (Bos taurus)
PMZ_0013950	Pes1	scaf_00046	6467654	6489427	1669.43	1.98104	0.368942	5.3722	7.78e-08	1.32e-06	Pes1		desc=Pescadillo homolog (Rattus norvegicus)	GO:0005730,GO:0042254
PMZ_0014025	lap	scaf_00018	2223243	2241797	8995.69	2.25465	0.53354	4.23305	2.31e-05	0.000181722	lap	YH24	desc=Putative aminopeptidase W07G4.4 (Caenorhabditis elegans)	GO:0004177,GO:0005622,GO:0005737,GO:0006508,GO:0008235,GO:0019538,GO:0030145	GO:0005737
PMZ_0014103	NUDT22	scaf_00036	6043621	6057423	1207.1	2.64148	0.409395	6.44925	1.12e-10	4.26e-09	NUDT22	NUD22	desc=Nucleoside diphosphate-linked moiety X motif 22 (Homo sapiens)		GO:0016787
PMZ_0014172	CPSF1	scaf_00250	136888	142446	196.665	2.46967	0.590925	4.17157	3.03e-05	0.000229271	CPSF1	CPSF1	desc=Cleavage and polyadenylation specificity factor subunit 1 (Homo sapiens)		GO:0005847
PMZ_0014196	Snx30	scaf_00043	8161775	8184715	695.327	2.83585	0.37475	7.56593	3.85e-14	3.24e-12	Snx30	SNX30	desc=Sorting nexin-30 (Mus musculus)	GO:0035091	GO:0005768
PMZ_0014233	Stt3a	scaf_00030	2234128	2252848	6287.08	1.25049	0.335339	3.73	0.000191481	0.001107	Stt3a		desc=Dolichyl-diphosphooligosaccharide--protein glycosyltransferase subunit STT3A (Mus musculus)	GO:0004576,GO:0006486,GO:0016020
PMZ_0014242	Scn8a	scaf_00005	19642328	19681087	134.432	3.35997	0.784481	4.28447	1.83e-05	0.000148837	Scn8a	SCN2A/SC4AA	desc=Sodium channel protein type 8 subunit alpha (Mus musculus)	GO:0001518,GO:0005216,GO:0005248,GO:0006811,GO:0006814,GO:0016020,GO:0055085	GO:0005886
PMZ_0014303	Ctss	scaf_00003	2180162	2187543	2348.35	2.47543	0.412883	6.00003	1.97e-09	5.31e-08	Ctss	CFAD/CATS	desc=Cathepsin S (Mus musculus)	GO:0006508,GO:0008234	GO:0031905
PMZ_0014317	Rrp9	scaf_00027	7173725	7198143	614.991	2.5749	0.504086	5.10494	3.31e-07	4.57e-06	Rrp9		desc=U3 small nucleolar RNA-interacting protein 2 (Mus musculus)	GO:0005515
PMZ_0014331	Exoc5	scaf_00009	15789290	15799447	748.364	1.877	0.451692	4.15398	3.27e-05	0.000244545	Exoc5		desc=Exocyst complex component 5 (Rattus norvegicus)	GO:0005737,GO:0006887,GO:0048278
PMZ_0014349	NEK9	scaf_00029	3995415	4037054	2346.16	1.66308	0.414731	4.01141	6.04e-05	0.000412243	NEK9	NEK9	desc=Serine/threonine-protein kinase Nek9 (Homo sapiens)	GO:0004672,GO:0005524,GO:0006468,GO:0016772	GO:0005829
PMZ_0014451	RAI1	scaf_00037	1417537	1441011	9040.7	1.73702	0.376565	4.61062	4.01e-06	4.01e-05	RAI1	TCF20	desc=Retinoic acid-induced protein 1 (Homo sapiens)		GO:0005634
PMZ_0014534	POLD3	scaf_00001	14393920	14414761	665.55	1.06942	0.343556	3.11321	0.00185063	0.00753952	POLD3	DPOD3	desc=DNA polymerase delta subunit 3 (Bos taurus)		GO:0005634
PMZ_0014545	HDLBP	scaf_00039	5418642	5457461	16629.3	1.53084	0.332759	4.60715	4.08e-06	4.07e-05	HDLBP		desc=Vigilin (Gallus gallus)	GO:0003676,GO:0003723
PMZ_0014549	B3GALTL	scaf_00305	56090	100659	601.765	1.60082	0.494039	3.24109	0.00119075	0.00522012	B3GALTL	B3GLT	desc=Beta-1%2C3-glucosyltransferase (Homo sapiens)	GO:0016020,GO:0016757	GO:0005789
PMZ_0014634	zgc:123335	scaf_00003	17927836	17932431	1418.88	3.11688	0.55452	5.62038	1.91e-08	3.86e-07	zgc:123335	CE045	desc=UPF0544 protein C5orf45 homolog (Danio rerio)
PMZ_0014654	gmppb	scaf_00010	4603042	4613741	1086.96	2.0214	0.501515	4.03103	5.55e-05	0.00038457	gmppb	GMPBA	desc=Mannose-1-phosphate guanyltransferase beta (Danio rerio)	GO:0009058,GO:0016779	GO:0005525
PMZ_0014689	Furin	scaf_00060	736140	761294	766.023	2.26963	0.51312	4.41921	9.91e-06	8.71e-05	Furin	FURIN/FURI1	desc=Furin (Rattus norvegicus)	GO:0004252,GO:0006508	GO:0016021
PMZ_0014735	TDH	scaf_00040	1490770	1511403	328.078	2.61648	0.650918	4.03551	5.45e-05	0.000378654	TDH	TDH	desc=Inactive L-threonine 3-dehydrogenase%2C mitochondrial (Homo sapiens)	GO:0003824,GO:0050662	GO:0005739
PMZ_0014741	ZBTB11	scaf_00015	11460313	11462142	376.608	1.93939	0.559365	3.46578	0.000528688	0.00262251	ZBTB11	ZBT39	desc=Zinc finger and BTB domain-containing protein 11 (Homo sapiens)	GO:0003676,GO:0005515,GO:0046872	GO:0005634
PMZ_0014745	Cldn19	scaf_00005	9262277	9279196	2198.46	1.93795	0.535778	3.61961	0.000295044	0.00159556	Cldn19	CLD19	desc=Claudin-19 (Mus musculus)	GO:0005198,GO:0005923,GO:0016021	GO:0043296
PMZ_0014775	FAM57B	scaf_00007	7891128	7939571	82.4977	3.8225	1.04349	3.64453	0.000267881	0.00147369	FAM57B	FA57B	desc=Protein FAM57B (Homo sapiens)	GO:0016021	GO:0005783
PMZ_0014809	DHRS9	scaf_00035	5969407	5978505	3143.86	2.30649	0.755994	3.03797	0.00238174	0.00927347	DHRS9		desc=Dehydrogenase/reductase SDR family member 9 (Bos taurus)	GO:0008152,GO:0016491
PMZ_0014904	Nek8	scaf_00882	10203	21455	126.618	1.45388	0.47504	3.0579	0.00222891	0.00878226	Nek8		desc=Serine/threonine-protein kinase Nek8 (Rattus norvegicus)	GO:0004672,GO:0005524,GO:0006468,GO:0016772
PMZ_0014928	GTF3C6	scaf_00010	10997849	11011325	394.05	3.00854	0.517615	5.81186	6.18e-09	1.43e-07	GTF3C6	TF3C6	desc=General transcription factor 3C polypeptide 6 (Homo sapiens)		GO:0000127
PMZ_0014936	IGF2BP2	scaf_00099	304609	328067	21827.3	2.78094	0.400485	6.93896	3.95e-12	2.24e-10	IGF2BP2	IF2B1	desc=Insulin-like growth factor 2 mRNA-binding protein 2 (Homo sapiens)	GO:0000166,GO:0003676,GO:0003723	GO:0030424
PMZ_0014945	MANF	scaf_00027	752659	760453	5440.75	2.45047	0.525716	4.66726	3.05e-06	3.16e-05	MANF		desc=Mesencephalic astrocyte-derived neurotrophic factor (Bos taurus)
PMZ_0014997	HSP90B1	scaf_00042	5491363	5505082	19022	2.86725	0.649278	4.42499	9.64e-06	8.52e-05	HSP90B1	ENPL	desc=Endoplasmin (Canis familiaris)	GO:0005524,GO:0006457,GO:0006950,GO:0051082	GO:0005788
PMZ_0015019	VTI1B	scaf_00029	4617604	4622433	1913.73	2.17774	0.582681	3.73388	0.000188554	0.00109236	VTI1B	VTI1B	desc=Vesicle transport through interaction with t-SNAREs homolog 1B (Bos taurus)	GO:0006886,GO:0016020,GO:0016192	GO:0005794
PMZ_0015027	SNAP47	scaf_00004	12186435	12189102	850.217	2.86725	0.526392	5.44329	5.23e-08	9.38e-07	SNAP47	SNP47	desc=Synaptosomal-associated protein 47 (Bos taurus)	GO:0005515	GO:0031083
PMZ_0015053	NOP9	scaf_00027	428063	433148	1023.22	2.93774	0.593585	4.94615	7.57e-07	9.23e-06	NOP9		desc=Nucleolar protein 9 (Homo sapiens)	GO:0003723,GO:0005488
PMZ_0015054	Cops4	scaf_00027	433408	437737	3432.23	1.12531	0.361489	3.11001	0.00187084	0.00760751	Cops4		desc=COP9 signalosome complex subunit 4 (Mus musculus)	GO:0005515
PMZ_0015062	TMEM63B	scaf_00036	6144348	6210921	434.286	2.23461	0.410713	5.44326	5.23e-08	9.38e-07	TMEM63B	CSCL2	desc=CSC1-like protein 2 (Homo sapiens)	GO:0016020	GO:0016021
PMZ_0015067	TRAPPC11	scaf_00012	6241265	6278431	4272.53	1.5245	0.417114	3.654	0.000258191	0.00142929	TRAPPC11	TPC11	desc=Trafficking protein particle complex subunit 11 (Gallus gallus)		GO:0005794
PMZ_0015139	Rabep1	scaf_00038	2947551	2972414	2995.26	2.89322	0.493823	5.8563	4.73e-09	1.13e-07	Rabep1	RABE1	desc=Rab GTPase-binding effector protein 1 (Rattus norvegicus)	GO:0005096,GO:0005768,GO:0006897,GO:0008083	GO:0005769
PMZ_0015145	YOD1	scaf_00022	4479864	4487234	1133.38	1.62753	0.466537	3.4889	0.000485006	0.00243884	YOD1		desc=Ubiquitin thioesterase OTU1 (Homo sapiens)
PMZ_0015164	Fam151a	scaf_00023	1737624	1743094	3322.71	2.01143	0.662219	3.03327	0.00241922	0.00938928	Fam151a	F151A	desc=Protein FAM151A (Mus musculus)		GO:0070062
PMZ_0015188		scaf_00058	2876887	2888924	2122.75	1.73549	0.573489	3.01885	0.00253737	0.00976974			Note=Protein of unknown function
PMZ_0015247	tbp	scaf_00009	865443	876593	1186.58	1.97358	0.577835	3.41923	0.000627987	0.00303675	tbp		desc=TATA-box-binding protein (Danio rerio)	GO:0003677,GO:0006352
PMZ_0015257	Numb	scaf_00025	11913503	11930327	1645.49	1.57062	0.437641	3.58829	0.000332854	0.001769	Numb	NUMB	desc=Protein numb homolog (Rattus norvegicus)	GO:0005515	GO:0045177
PMZ_0015268		scaf_01907	5223	12434	108.861	1.48966	0.489448	3.04235	0.00234736	0.00916163			Note=Protein of unknown function	GO:0005488
PMZ_0015314	Pla2g15	scaf_00020	10893479	10911215	337.678	2.45884	0.81332	3.01818	0.00254294	0.0097859	Pla2g15	PAG15	desc=Group XV phospholipase A2 (Mus musculus)	GO:0006629,GO:0008374	GO:0070062
PMZ_0015388	DENND4A	scaf_00031	8485415	8535902	1575.78	2.84928	0.42588	6.69135	2.21e-11	1e-09	DENND4A	MYCPP	desc=C-myc promoter-binding protein (Homo sapiens)		GO:0005634
PMZ_0015488	TYSND1	scaf_00004	5942778	5956111	990.589	2.27796	0.508681	4.47899	7.5e-06	6.86e-05	TYSND1	TYSD1	desc=Peroxisomal leader peptide-processing protease (Homo sapiens)		GO:0016020
PMZ_0015515		scaf_00021	4640556	4670842	8838.62	5.11464	0.467983	10.9309	8.21e-28	7.97e-25		CC1	Note=Similar to G2/mitotic-specific cyclin-A (Fragment) (Hydra viridissima)		GO:0005634
PMZ_0015556	KLHDC3	scaf_00069	35843	58070	834.454	3.14315	0.558751	5.62114	1.9e-08	3.85e-07	KLHDC3	KLDC3	desc=Kelch domain-containing protein 3 (Bos taurus)	GO:0005515	GO:0005737
PMZ_0015586	rnz	scaf_00207	141923	147125	177.144	2.35676	0.650798	3.62117	0.00029327	0.00158833	rnz	RNZ1	desc=Ribonuclease Z (Synechococcus sp. (strain WH7803))	GO:0016891,GO:0042779	GO:0005829
PMZ_0015612	SCYL2	scaf_00002	19287989	19317636	673.441	2.022	0.621457	3.24965	0.00115545	0.00508142	SCYL2	SCYL2	desc=SCY1-like protein 2 (Homo sapiens)	GO:0004672,GO:0005488,GO:0005524,GO:0006468,GO:0016772	GO:0030136
PMZ_0015688	ATL2	scaf_00009	16549140	16587886	1868.31	2.01782	0.319588	6.31666	2.67e-10	9.14e-09	ATL2		desc=Atlastin-2 (Homo sapiens)	GO:0003924,GO:0005525
PMZ_0015699	MEGF10	scaf_00013	10158492	10228174	248.81	2.33761	0.449188	5.20716	1.92e-07	2.88e-06	MEGF10	MEG10	desc=Multiple epidermal growth factor-like domains protein 10 (Homo sapiens)	GO:0005515	GO:0016323
PMZ_0015775	GTPBP4	scaf_00035	11886743	11899092	4994.56	1.9726	0.382116	5.16551	2.4e-07	3.49e-06	GTPBP4		desc=Nucleolar GTP-binding protein 1 (Homo sapiens)	GO:0005525
PMZ_0015795	DNAJA1	scaf_00052	2753049	2769064	7252.52	2.25546	0.52721	4.27457	1.92e-05	0.000154612	DNAJA1	DNJA1	desc=DnaJ homolog subfamily A member 1 (Homo sapiens)	GO:0005524,GO:0006457,GO:0009408,GO:0031072,GO:0051082	GO:0098554
PMZ_0015840		scaf_00037	1223827	1226551	569.112	1.81911	0.556319	3.26488	0.00109509	0.00486889		ZN417		GO:0003676
PMZ_0015843	GTF3C3	scaf_00203	164988	176036	2178.19	1.48142	0.457506	3.2335	0.00122283	0.00534385	GTF3C3	TF3C3	desc=General transcription factor 3C polypeptide 3 (Homo sapiens)	GO:0005515	GO:0005654
PMZ_0015887		scaf_00492	13277	21801	6130.5	4.66856	1.0216	4.55276	5.29e-06	5.08e-05		DMBT1			GO:0019898
PMZ_0015894	Paqr3	scaf_00131	347283	362399	425.468	2.14824	0.371899	5.77439	7.72e-09	1.74e-07	Paqr3	PAQR3	desc=Progestin and adipoQ receptor family member 3 (Mus musculus)	GO:0016021	GO:0005794
PMZ_0015928	TMEM263	scaf_00003	5230715	5236775	1739.64	2.20279	0.434301	5.07579	3.86e-07	5.19e-06	TMEM263	TM263	desc=Transmembrane protein 263 (Bos taurus)		GO:0016021
PMZ_0016006	MINA	scaf_00040	1788148	1802636	2002.82	2.04809	0.401995	5.09446	3.5e-07	4.78e-06	MINA	MI	desc=Bifunctional lysine-specific demethylase and histidyl-hydroxylase MINA (Homo sapiens)		GO:0005737
PMZ_0016063	ATRNL1	scaf_00015	12137559	12218226	916.458	2.69027	0.565727	4.75453	1.99e-06	2.17e-05	ATRNL1	ATRN1	desc=Attractin-like protein 1 (Homo sapiens)	GO:0005515,GO:0016020	GO:0016021
PMZ_0016068	MUC5B	scaf_00054	1282303	1308627	8671.93	6.69384	0.799316	8.36561	5.98e-17	9.37e-15	MUC5B		desc=Mucin-5B (Gallus gallus)
PMZ_0016098	CUL1	scaf_00016	11204268	11226949	7867.48	1.93947	0.401623	4.82828	1.38e-06	1.57e-05	CUL1	CUL1	desc=Cullin-1 (Homo sapiens)	GO:0006511,GO:0031461,GO:0031625	GO:0019005
PMZ_0016099	Ezh2	scaf_00016	11226979	11240513	6768.05	1.51371	0.397357	3.80848	0.000139822	0.000848761	Ezh2	EZH2	desc=Histone-lysine N-methyltransferase EZH2 (Mus musculus)	GO:0003682,GO:0005515,GO:0018024	GO:0005737
PMZ_0016161	Dync1li2	scaf_00020	10820751	10844854	1895.38	1.73972	0.416256	4.17717	2.95e-05	0.000224752	Dync1li2	DC1L1	desc=Cytoplasmic dynein 1 light intermediate chain 2 (Mus musculus)	GO:0003777,GO:0005868,GO:0007018	GO:0005813
PMZ_0016195	ABCF3	scaf_00048	3673321	3712539	1811.71	1.71304	0.328215	5.22004	1.79e-07	2.71e-06	ABCF3	ABCF3	desc=ATP-binding cassette sub-family F member 3 (Pongo abelii)	GO:0005524,GO:0016887	GO:0016020
PMZ_0016199	GAK	scaf_00043	3031163	3086281	596.337	1.68796	0.492895	3.4221	0.000621399	0.00301089	GAK	GAK	desc=Cyclin-G-associated kinase (Homo sapiens)	GO:0005515	GO:0005925
PMZ_0016217	DDX27	scaf_00020	10496443	10522511	2798.62	2.2199	0.483566	4.59238	4.38e-06	4.31e-05	DDX27	DDX27	desc=Probable ATP-dependent RNA helicase DDX27 (Homo sapiens)	GO:0003676,GO:0005524	GO:0005634
PMZ_0016231	ZP3	scaf_02089	11322	21661	1551.27	5.27673	0.93184	5.64887	1.62e-08	3.34e-07	ZP3	ZP3	desc=Zona pellucida sperm-binding protein 3 (Gallus gallus)		GO:0016021
PMZ_0016274		scaf_00009	268299	281337	1241.02	2.42245	0.68915	3.50928	0.000449324	0.00228305
PMZ_0016290	ALOX5	scaf_03935	8217	12980	9361.65	4.83637	1.0253	4.69771	2.63e-06	2.77e-05	ALOX5	LOX5	desc=Arachidonate 5-lipoxygenase (Homo sapiens)	GO:0016702,GO:0046872,GO:0055114	GO:0005829
PMZ_0016291	ALOXE3	scaf_01082	26252	29217	1154.67	7.45686	1.00123	7.37011	1.7e-13	1.3e-11	ALOXE3	LOX5	desc=Hydroperoxide isomerase ALOXE3 (Homo sapiens)	GO:0016702,GO:0046872,GO:0055114	GO:0005829
PMZ_0016310	NAMPT	scaf_00082	1881563	1906409	2463.12	3.28325	0.537077	6.1165	9.57e-10	2.79e-08	NAMPT		desc=Nicotinamide phosphoribosyltransferase (Sus scrofa)	GO:0004514,GO:0009435
PMZ_0016319	KIAA1324	scaf_00049	282787	306275	798.61	3.36964	0.498378	6.75611	1.42e-11	6.78e-10	KIAA1324	K1324	desc=UPF0577 protein KIAA1324 (Homo sapiens)		GO:0070062
PMZ_0016323	RABGEF1	scaf_00038	8290538	8319001	3054.66	2.22209	0.497914	4.45773	8.28e-06	7.46e-05	RABGEF1	RABX5	desc=Rab5 GDP/GTP exchange factor (Bos taurus)	GO:0003677,GO:0008270	GO:0005769
PMZ_0016324	Taar7b	scaf_00032	348038	360419	565.406	1.62082	0.455846	3.55483	0.000378223	0.00197499	Taar7b		desc=Trace amine-associated receptor 7b (Mus musculus)	GO:0004930,GO:0007186,GO:0016021
PMZ_0016514		scaf_00098	95023	115788	141.186	2.95465	0.607507	4.85254	1.22e-06	1.41e-05
PMZ_0016515	ABTB1	scaf_00074	1538584	1560816	829.408	2.14891	0.414685	5.17994	2.22e-07	3.25e-06	ABTB1		desc=Ankyrin repeat and BTB/POZ domain-containing protein 1 (Homo sapiens)	GO:0005515
PMZ_0016541	lpar1	scaf_00006	9196281	9223844	1248	2.59998	0.707935	3.67205	0.000240616	0.00134387	lpar1	LPA11	desc=Lysophosphatidic acid receptor 1-A (Xenopus laevis)	GO:0004930,GO:0007186,GO:0016021,GO:0070915	GO:0016021
PMZ_0016600	Nanp	scaf_00036	5972141	5977476	692.972	2.55291	0.628549	4.05663	4.98e-05	0.000350783	Nanp	NP	desc=N-acylneuraminate-9-phosphatase (Mus musculus)	GO:0008152,GO:0016787	GO:0050124
PMZ_0016618	Mras	scaf_00028	10271101	10292320	1002.92	3.07983	0.572797	5.37433	7.69e-08	1.31e-06	Mras	RASM	desc=Ras-related protein M-Ras (Mus musculus)	GO:0003924,GO:0005525,GO:0005622,GO:0006886,GO:0006913,GO:0007165,GO:0007264,GO:0015031,GO:0016020	GO:0070062
PMZ_0016637	ODC1	scaf_00001	6313425	6325266	23561.4	4.98426	0.419308	11.8884	1.36e-32	2.2e-29	ODC1	AZIN2/DCOR1	desc=Ornithine decarboxylase (Cricetulus griseus)	GO:0003824,GO:0006596	GO:0005737
PMZ_0016642	CEP95	scaf_00037	3333225	3361939	3049.45	1.74062	0.489297	3.54789	0.000388327	0.00201853	CEP95	CEP95	desc=Centrosomal protein of 95 kDa (Homo sapiens)	GO:0000922,GO:0005813	GO:0005813
PMZ_0016648	Homer1	scaf_00013	5131102	5153554	305.234	3.0999	0.850476	3.64442	0.000267991	0.00147387	Homer1	HOME3/HOME1	desc=Homer protein homolog 1 (Rattus norvegicus)		GO:0045177
PMZ_0016664	FBXL12	scaf_00079	1405026	1409029	1957.73	2.32187	0.394049	5.88884	3.89e-09	9.54e-08	FBXL12	FXL12	desc=F-box/LRR-repeat protein 12 (Bos taurus)		GO:0016567
PMZ_0016723	impdh1a	scaf_00022	4414523	4452830	980.422	1.28574	0.403913	3.18818	0.0014317	0.00610555	impdh1a		desc=Inosine-5'-monophosphate dehydrogenase 1a (Danio rerio)	GO:0003824,GO:0055114
PMZ_0016745	MAL	scaf_00003	11080284	11090901	3166.87	5.2629	0.732906	7.18614	6.66e-13	4.48e-11	MAL	MAL	desc=Myelin and lymphocyte protein (Homo sapiens)	GO:0016020	GO:0016324
PMZ_0016753		scaf_00003	5870958	5871527	322.784	1.95104	0.594046	3.28128	0.00103336	0.00463997				GO:0003676,GO:0046983
PMZ_0016781	Abcc10	scaf_00020	367297	390693	482.106	2.13567	0.668202	3.19993	0.00137462	0.00589448	Abcc10	MRP7	desc=Multidrug resistance-associated protein 7 (Mus musculus)	GO:0005524,GO:0006810,GO:0016021,GO:0016887,GO:0042626,GO:0055085	GO:0016021
PMZ_0016840	DIRAS2	scaf_00043	54509	57536	48.8253	3.5084	1.1485	3.02932	0.00245106	0.0094863	DIRAS2	DIRA2	desc=GTP-binding protein Di-Ras2 (Homo sapiens)	GO:0005525,GO:0005622,GO:0007165,GO:0007264,GO:0015031,GO:0016020	GO:0005886
PMZ_0016974	tmub1	scaf_00037	2372145	2374726	2631.65	3.43299	0.400301	8.58091	9.41e-18	1.56e-15	tmub1	TMUB2	desc=Transmembrane and ubiquitin-like domain-containing protein 1 (Danio rerio)	GO:0005515	GO:0016021
PMZ_0017016	TDRD6	scaf_00001	9257283	9268096	397.777	2.36555	0.525556	4.49447	6.97e-06	6.45e-05	TDRD6	TDR15	desc=Tudor domain-containing protein 6 (Homo sapiens)		GO:0016788
PMZ_0017041	KLC4	scaf_00009	12543083	12571162	2748.46	1.25689	0.388521	3.23182	0.00123003	0.00536739	KLC4		desc=Kinesin light chain 4 (Bos taurus)	GO:0003777,GO:0005515,GO:0005871
PMZ_0017043	PDCD2	scaf_00025	8641388	8645293	800.541	2.43599	0.57492	4.24028	2.23e-05	0.000176636	PDCD2	PDCD2	desc=Programmed cell death protein 2 (Bos taurus)	GO:0005737	GO:0005737
PMZ_0017051	KLF7	scaf_00003	24734884	24740026	317.538	2.19429	0.400114	5.48446	4.15e-08	7.63e-07	KLF7		desc=Krueppel-like factor 7 (Homo sapiens)	GO:0003676,GO:0046872
PMZ_0017081	FLVCR1	scaf_00041	613389	634013	220.76	2.07711	0.465715	4.45772	8.28e-06	7.46e-05	FLVCR1		desc=Feline leukemia virus subgroup C receptor-related protein 1 (Homo sapiens)	GO:0016021,GO:0055085
PMZ_0017083	mical1	scaf_00002	19020382	19053061	114.227	2.59714	0.74549	3.49324	0.0004772	0.00240519	mical1	MICA3	desc=Protein-methionine sulfoxide oxidase mical1 (Danio rerio)	GO:0003779,GO:0005515,GO:0007010,GO:0008270,GO:0016709,GO:0030042	GO:0005737
PMZ_0017089	KBTBD2	scaf_00005	21406870	21417599	456.511	2.04906	0.512969	3.99192	6.55e-05	0.000443905	KBTBD2	KBTB2	desc=Kelch repeat and BTB domain-containing protein 2 (Homo sapiens)	GO:0005515
PMZ_0017122	Yif1b	scaf_00041	4467001	4477857	2104.68	1.25794	0.308547	4.07722	4.56e-05	0.00032645	Yif1b		desc=Protein YIF1B (Rattus norvegicus)
PMZ_0017141	MTMR3	scaf_00007	11210447	11228120	5017.51	3.0777	0.395353	7.78315	7.07e-15	6.77e-13	MTMR3	MTMR3	desc=Myotubularin-related protein 3 (Homo sapiens)		GO:0005737
PMZ_0017220	COQ5	scaf_00007	15635933	15646465	1115.51	1.80778	0.462404	3.9126	9.13e-05	0.000590622	COQ5	COQ5	desc=2-methoxy-6-polyprenyl-1%2C4-benzoquinol methylase%2C mitochondrial (Bos taurus)	GO:0008168	GO:0005739
PMZ_0017287	Fam169a	scaf_00013	7824308	7841263	1075.41	1.71868	0.472792	3.63079	0.000282556	0.00153959	Fam169a	F169A	desc=Soluble lamin-associated protein of 75 kDa (Mus musculus)		GO:0005637
PMZ_0017499	SUPV3L1	scaf_00018	13436807	13455348	501.988	1.45052	0.417459	3.47344	0.000513823	0.00255792	SUPV3L1	SUV3	desc=ATP-dependent RNA helicase SUPV3L1%2C mitochondrial (Homo sapiens)		GO:0045025
PMZ_0017515	syvn1	scaf_00029	9709610	9729431	2816.16	2.60973	0.427039	6.11128	9.88e-10	2.87e-08	syvn1	SYVN1/SYVNB	desc=E3 ubiquitin-protein ligase synoviolin (Danio rerio)	GO:0005515,GO:0008270	GO:0005789
PMZ_0017534	Ccdc14	scaf_00004	14345585	14358507	383.572	4.6311	0.680282	6.80833	9.87e-12	4.97e-10	Ccdc14	CCD14	desc=Coiled-coil domain-containing protein 14 (Mus musculus)		GO:0005813
PMZ_0017572	s100a1	scaf_07891	2177	3063	826.131	3.57362	1.10646	3.21785	0.00129155	0.0055901	s100a1	S10A1	desc=Protein S100-A1 (Misgurnus fossilis)		GO:0005737
PMZ_0017577	TSHR	scaf_00025	9341498	9352236	166.712	3.16424	0.790074	4.00305	6.25e-05	0.000425163	TSHR	TSHR	desc=Thyrotropin receptor (Sus scrofa)	GO:0004930,GO:0004996,GO:0007186,GO:0016021,GO:0016500	GO:0016021
PMZ_0017588		scaf_00126	523456	537176	28867.8	5.54182	1.0482	5.25339	1.49e-07	2.33e-06	zgc:113413	TTL	desc=Natterin-like protein (Danio rerio)
PMZ_0017634	PDIA3	scaf_00031	750464	759365	18530	3.29261	0.537339	6.1353	8.5e-10	2.51e-08	PDIA3	PDIA3	desc=Protein disulfide-isomerase A3 (Gallus gallus)	GO:0005783,GO:0016853,GO:0045454	GO:0009986
PMZ_0017660	Cspg4	scaf_00046	8047041	8083485	665.564	2.36482	0.630497	3.74795	0.000178287	0.00104157	Cspg4		desc=Chondroitin sulfate proteoglycan 4 (Rattus norvegicus)
PMZ_0017707	Col7a1	scaf_00013	771066	789012	1200.42	1.40518	0.386812	3.6349	0.00027809	0.00152038	Col7a1	T2EB	desc=Collagen alpha-1(VII) chain (Mus musculus)	GO:0006367	GO:0005673
PMZ_0017731	E2F3	scaf_00002	1871986	1889987	1879.11	2.79348	0.643339	4.34511	1.39e-05	0.000116957	E2F3	E2F3	desc=Transcription factor E2F3 (Homo sapiens)	GO:0003700,GO:0005667,GO:0006355	GO:0005737
PMZ_0017732	MLX	scaf_00005	13834771	13838473	1504.27	1.26742	0.352458	3.60005	0.000318157	0.00170066	MLX	MLX	desc=Max-like protein X (Homo sapiens)	GO:0046983	GO:0005737
PMZ_0017836	TBC1D2B	scaf_00006	4633537	4652017	442.916	3.50983	0.698626	5.02489	5.04e-07	6.53e-06	TBC1D2B	TBD2B	desc=TBC1 domain family member 2B (Homo sapiens)		GO:0005097
PMZ_0017850		scaf_00030	1911667	1921373	925.592	1.39001	0.382663	3.62735	0.00028634	0.00155715
PMZ_0017864	POLR3B	scaf_00003	5260406	5285337	1003.18	1.96105	0.500999	3.91436	9.06e-05	0.000587307	POLR3B	RPC2	desc=DNA-directed RNA polymerase III subunit RPC2 (Homo sapiens)	GO:0003677,GO:0003899,GO:0006351,GO:0032549	GO:0005829
PMZ_0017865	ELL2	scaf_00031	2580243	2606233	1807.78	2.3735	0.54314	4.36496	1.27e-05	0.000108039	ELL2	ELL2	desc=RNA polymerase II elongation factor ELL2 (Homo sapiens)	GO:0006368,GO:0008023	GO:0005813
PMZ_0017916	Akr1b1	scaf_00018	13222218	13258959	228.193	2.57193	0.803719	3.19951	0.00137661	0.00590172	Akr1b1	ALDR	desc=Aldose reductase (Mus musculus)	GO:0016491,GO:0055114	GO:0005737
PMZ_0018075	EIF2B5	scaf_00048	3819821	3879173	3354.76	1.27261	0.383438	3.31908	0.000903139	0.00412691	EIF2B5	EI2BE	desc=Translation initiation factor eIF-2B subunit epsilon (Homo sapiens)	GO:0003677,GO:0004252,GO:0004518,GO:0004527,GO:0005488,GO:0005515,GO:0006508,GO:0009058,GO:0016779	GO:0005737
PMZ_0018105	Cirh1a	scaf_00045	2187197	2203956	2469.67	3.0284	0.518536	5.84632	5.03e-09	1.19e-07	Cirh1a	CIR1A	desc=Cirhin (Mus musculus)	GO:0005515	GO:0005730
PMZ_0018144	VAMP7	scaf_00021	6822768	6836357	2000.36	2.40289	0.550338	4.36195	1.29e-05	0.000109348	VAMP7	VAMP7	desc=Vesicle-associated membrane protein 7 (Gallus gallus)	GO:0006810,GO:0016021,GO:0016192	GO:0045177
PMZ_0018155	CLN5	scaf_00021	7528944	7536904	1276.76	1.82346	0.427691	4.26615	1.99e-05	0.000159373	CLN5	CLN5	desc=Ceroid-lipofuscinosis neuronal protein 5 (Ovis aries)	GO:0005764,GO:0022008	GO:0005764
PMZ_0018314	lrrcc1	scaf_00033	3703083	3767551	913.734	2.52681	0.646842	3.89784	9.71e-05	0.00062242	lrrcc1	LRCC1	desc=Leucine-rich repeat and coiled-coil domain-containing protein 1 (Xenopus laevis)		GO:0005814
PMZ_0018316	ASF1A	scaf_00046	3346224	3353259	372.715	2.34296	0.668648	3.50153	0.000462601	0.00234024	ASF1A		desc=Histone chaperone ASF1A (Bos taurus)	GO:0005634,GO:0006333
PMZ_0018354	SPSB1	scaf_00048	4947650	4973019	547.149	3.47593	0.826972	4.21407	2.51e-05	0.000195268	SPSB1	SPSB4	desc=SPRY domain-containing SOCS box protein 1 (Bos taurus)	GO:0005515,GO:0035556	GO:0005737
PMZ_0018430	SEC22A	scaf_00016	2831794	2843383	494.944	2.68585	0.391991	6.84961	7.4e-12	3.87e-10	SEC22A	SC22A	desc=Vesicle-trafficking protein SEC22a (Macaca fascicularis)	GO:0006810	GO:0005789
PMZ_0018467	RAPGEF1	scaf_00106	141463	192233	284.236	1.75192	0.425025	4.12664	3.68e-05	0.000270774	RAPGEF1	RPGF1	desc=Rap guanine nucleotide exchange factor 1 (Homo sapiens)	GO:0005085,GO:0007264	GO:0005829
PMZ_0018470	FNIP2	scaf_00012	11295382	11331869	575.513	3.5661	0.621097	5.73076	1e-08	2.2e-07	FNIP2	FNIP2	desc=Folliculin-interacting protein 2 (Homo sapiens)		GO:0005737
PMZ_0018484	MAGI1	scaf_00042	6980918	7020328	324.658	3.59234	0.56277	6.3798	1.77e-10	6.31e-09	MAGI1	MAGI1/MAGI3	desc=Membrane-associated guanylate kinase%2C WW and PDZ domain-containing protein 1 (Homo sapiens)	GO:0005515,GO:0005923,GO:0032947	GO:0005886
PMZ_0018504	Tdg	scaf_00039	8722292	8736255	186.604	2.41794	0.570824	4.2358	2.28e-05	0.000179761	Tdg		desc=G/T mismatch-specific thymine DNA glycosylase (Mus musculus)	GO:0006281,GO:0016799
PMZ_0018517	CGNL1	scaf_00046	7870081	7912298	173.666	1.89995	0.541697	3.50567	0.000455454	0.00230756	CGNL1		desc=Cingulin-like protein 1 (Homo sapiens)
PMZ_0018533	Ptdss1	scaf_00011	6399895	6416586	421.561	2.93607	0.541281	5.42531	5.79e-08	1.02e-06	Ptdss1	PTSS1	desc=Phosphatidylserine synthase 1 (Mus musculus)	GO:0006659	GO:0005789
PMZ_0018583	MB21D2	scaf_00061	2998083	3006838	323.038	1.33136	0.415846	3.20062	0.00137134	0.005883	MB21D2	M21D2	desc=Protein MB21D2 (Homo sapiens)		GO:0032403
PMZ_0018584	RUNDC1	scaf_00061	2985887	2994783	445.868	2.1617	0.481923	4.4825	7.38e-06	6.77e-05	RUNDC1	RUND1	desc=RUN domain-containing protein 1 (Homo sapiens)
PMZ_0018587	PSAP	scaf_00044	9170070	9188699	7978.26	5.18227	0.543208	9.5476	1.33e-21	4.37e-19	PSAP		desc=Prosaposin (Bos taurus)	GO:0006629
PMZ_0018613		scaf_00040	1815509	1854741	807.159	2.33033	0.451724	5.16043	2.46e-07	3.57e-06
PMZ_0018633	ZCRB1	scaf_00011	9120989	9128821	114.523	1.54627	0.413441	3.73876	0.00018493	0.00107585	ZCRB1	ZCRB1	desc=Zinc finger CCHC-type and RNA-binding motif-containing protein 1 (Bos taurus)		GO:0005681
PMZ_0018681	SNAPC3	scaf_00013	4661239	4666441	1211.26	1.43031	0.438879	3.25945	0.00111629	0.00493714	SNAPC3	SNPC3	desc=snRNA-activating protein complex subunit 3 (Bos taurus)		GO:0005634
PMZ_0018682	PSIP1	scaf_00013	4671130	4687034	1093.31	1.79045	0.461622	3.87624	0.000106084	0.000671887	PSIP1	HDGR2	desc=Lens epithelium-derived growth factor (Gallus gallus)		GO:0005634
PMZ_0018696	TMX3	scaf_00045	5894286	5914800	1191.15	2.98457	0.473904	6.30164	2.95e-10	9.98e-09	TMX3	TMX3	desc=Protein disulfide-isomerase TMX3 (Homo sapiens)	GO:0045454	GO:0009986
PMZ_0018710	DHX8	scaf_00035	2264046	2298216	5846.74	1.32273	0.311195	4.2496	2.14e-05	0.000170241	DHX8		desc=ATP-dependent RNA helicase DHX8 (Homo sapiens)	GO:0003676,GO:0004386,GO:0005524,GO:0008026
PMZ_0018813	UBN1	scaf_00011	8280666	8303392	759.203	2.07839	0.362283	5.7353	9.73e-09	2.16e-07	UBN1	UBN1	desc=Ubinuclein-1 (Homo sapiens)	GO:0005634,GO:0016568	GO:0005654
PMZ_0018888	2020-09-06	scaf_00276	35328	56971	1021.65	1.55588	0.378448	4.10927	3.97e-05	0.000289414	2020-09-07		desc=Septin-7 (Bos taurus)	GO:0005525
PMZ_0018971	C9orf156	scaf_00013	14850926	14859006	893.06	2.25256	0.531383	4.23264	2.31e-05	0.000181789	C9orf156	TRMO	desc=Nef-associated protein 1 (Homo sapiens)
PMZ_0018989	FMNL2	scaf_00035	8927025	8978495	1982.34	1.84136	0.564169	3.26294	0.00110264	0.00489239	FMNL2		desc=Formin-like protein 2 (Homo sapiens)	GO:0003779,GO:0005488,GO:0007010,GO:0016043,GO:0017048,GO:0022604,GO:0030036
PMZ_0018992	SBNO1	scaf_00007	18124654	18142647	4954.49	1.45825	0.463841	3.14037	0.00168737	0.00698426	SBNO1	SBNO1	desc=Protein strawberry notch homolog 1 (Gallus gallus)	GO:0006355	GO:0006355
PMZ_0019008	C1GALT1	scaf_00014	11444956	11445897	14.3268	4.09908	1.19162	3.35827	0.00078431	0.00367291	C1GALT1		desc=Glycoprotein-N-acetylgalactosamine 3-beta-galactosyltransferase 1 (Bos taurus)	GO:0016020,GO:0016263,GO:0016266,GO:0016757
PMZ_0019079	Akap1	scaf_00038	10008512	10036060	1100.69	2.59709	0.519386	5.00039	5.72e-07	7.24e-06	Akap1	AKAP1	desc=A-kinase anchor protein 1%2C mitochondrial (Mus musculus)	GO:0003676,GO:0003723	GO:0005783
PMZ_0019084	uafA	scaf_00044	4018910	4029844	1490.37	2.38015	0.588332	4.03649	5.43e-05	0.000377384	uafA		desc=Uro-adherence factor A (Staphylococcus saprophyticus subsp. saprophyticus (strain ATCC 15305 / DSM 20229))
PMZ_0019275	DERL1	scaf_00020	10791205	10800492	3074.19	1.41293	0.40696	3.47187	0.000516848	0.00256969	DERL1	DERL1	desc=Derlin-1 (Homo sapiens)		GO:0005769
PMZ_0019325	KCNB2	scaf_00056	4606848	4617979	26.5373	3.4396	1.01946	3.34603	0.000819782	0.00381055	KCNB2		desc=Potassium voltage-gated channel subfamily B member 2 (Oryctolagus cuniculus)	GO:0005216,GO:0005249,GO:0006811,GO:0006813,GO:0008076,GO:0016020,GO:0055085
PMZ_0019389	ARF6	scaf_00009	16507385	16507912	909.332	2.47684	0.596794	4.15148	3.3e-05	0.000246896	ARF6		desc=ADP-ribosylation factor 6 (Gallus gallus)	GO:0005525,GO:0005622,GO:0006886,GO:0007264,GO:0015031
PMZ_0019408	MARVELD3	scaf_00004	16283	20588	1472.1	4.3847	0.540617	8.10371	5.33e-16	6.68e-14	MARVELD3	MALD3	desc=MARVEL domain-containing protein 3 (Homo sapiens)		GO:0031410
PMZ_0019584	DAG1	scaf_00042	2936080	2940191	578.351	2.29653	0.589341	3.89263	9.92e-05	0.000633422	DAG1	DAG1	desc=Dystroglycan (Sus scrofa)	GO:0005509,GO:0016020	GO:0005604
PMZ_0019597	TSC22D2	scaf_00077	523787	530538	1609.97	2.45461	0.576595	4.25238	2.12e-05	0.000168427	TSC22D2	T22D2	desc=TSC22 domain family protein 2 (Homo sapiens)	GO:0003700,GO:0006355	GO:0003700
PMZ_0019614	Eapp	scaf_00047	1943264	1955045	677.087	1.7081	0.538084	3.17107	0.00151878	0.00640796	Eapp		desc=E2F-associated phosphoprotein (Mus musculus)
PMZ_0019616	MTR	scaf_00139	327198	351762	1946.69	1.61876	0.45197	3.58286	0.000339847	0.00180124	MTR	METH	desc=Methionine synthase (Bos taurus)	GO:0005622,GO:0008705,GO:0008898,GO:0009086,GO:0031419,GO:0042558,GO:0044237,GO:0046872	GO:0005737
PMZ_0019676		scaf_00014	5028582	5032749	459.771	1.85218	0.385653	4.80019	1.59e-06	1.78e-05
PMZ_0019752	YWHAG	scaf_00038	11573989	11576765	437.022	1.93298	0.456553	4.23314	2.3e-05	0.000181722	YWHAG	1433G	desc=14-3-3 protein gamma (Homo sapiens)	GO:0019904	GO:0005737
PMZ_0019801	IFRD1	scaf_00022	10305609	10325638	1534.63	1.61656	0.455095	3.55107	0.000383668	0.00199752	IFRD1		desc=Interferon-related developmental regulator 1 (Sus scrofa)	GO:0005488
PMZ_0019843	Card14	scaf_00019	11407329	11465812	810.487	2.41712	0.796342	3.03563	0.00240034	0.00933278	Card14	CAR11	desc=Caspase recruitment domain-containing protein 14 (Mus musculus)	GO:0005515	GO:0005737
PMZ_0019863	USP47	scaf_00002	24992371	25031642	1604.49	2.17778	0.508132	4.28148	1.86e-05	0.000150517	USP47	UBP47	desc=Ubiquitin carboxyl-terminal hydrolase 47 (Gallus gallus)	GO:0006511,GO:0036459	GO:0005737
PMZ_0019924	LCMT1	scaf_00019	3691801	3700901	246.476	1.65496	0.492713	3.35559	0.000791951	0.00370423	LCMT1	LCMT1	desc=Leucine carboxyl methyltransferase 1 (Bos taurus)	GO:0008168,GO:0032259	GO:0005829
PMZ_0020004	ZP4	scaf_00478	45833	54532	109347	6.13127	1.04136	5.84782	4.98e-09	1.19e-07	ZP4	ZP4	desc=Zona pellucida sperm-binding protein 4 (Bos taurus)		GO:0005794
PMZ_0020099		scaf_00126	541748	550150	70522.4	5.57108	1.1644	4.72344	2.32e-06	2.48e-05	zgc:113413	TTL	desc=Natterin-like protein (Danio rerio)
PMZ_0020230	ZP4	scaf_03628	3170	10442	44396.9	6.30095	1.02325	6.11727	9.52e-10	2.78e-08	ZP4		desc=Zona pellucida sperm-binding protein 4 (Bos taurus)
PMZ_0020238	cyp3a40	scaf_01488	9073	13537	118.37	3.256	0.900017	3.61049	0.000305623	0.00164543	cyp3a40	C340	desc=Cytochrome P450 3A40 (Oryzias latipes)	GO:0005506,GO:0016705,GO:0020037,GO:0055114	GO:0005789
PMZ_0020239	BAZ1A	scaf_00009	6000463	6015128	2178.02	2.3283	0.34217	6.80198	1.03e-11	5.17e-10	BAZ1A		desc=Bromodomain adjacent to zinc finger domain protein 1A (Homo sapiens)
PMZ_0020280	Prss44	scaf_02604	10045	13608	83.0561	2.88206	0.932413	3.08093	0.00206357	0.00823205	Prss44	TMPS9	desc=Serine protease 44 (Mus musculus)	GO:0004252,GO:0006508	GO:0005887
PMZ_0020288	osbpl9	scaf_00023	858379	881041	121.715	1.68159	0.469565	3.58735	0.00033405	0.00177341	osbpl9	OSBL9	desc=Oxysterol-binding protein-related protein 9 (Xenopus tropicalis)		GO:0008289
PMZ_0020317	DMBT1	scaf_00520	18951	21175	11934	3.58609	1.13203	3.15157	0.00162393	0.00676926	DMBT1	DMBT1	desc=Deleted in malignant brain tumors 1 protein (Homo sapiens)		GO:0005737
PMZ_0020322		scaf_00126	560223	576761	28938.2	5.68776	1.0675	5.28753	1.24e-07	1.98e-06	zgc:113413	TTL	desc=Natterin-like protein (Danio rerio)
PMZ_0020368	OR52D1	scaf_00071	628566	629219	10.1909	5.22889	1.47126	3.47493	0.000510993	0.00254579	OR52D1	O52D1	desc=Olfactory receptor 52D1 (Homo sapiens)	GO:0004930,GO:0004984,GO:0007186,GO:0016021	GO:0016021
PMZ_0020426	mov10b.1	scaf_00042	445995	468366	1053.99	5.51666	0.413408	13.3318	1.51e-40	7.35e-37	mov10b.1	MOV10	desc=Putative helicase mov-10-B.1 (Danio rerio)		GO:0000932
PMZ_0020432	SNTB1	scaf_00020	10740272	10782523	102.155	1.66366	0.466225	3.57415	0.000351367	0.00185219	SNTB1	SNTB1	desc=Beta-1-syntrophin (Homo sapiens)	GO:0005515	GO:0005737
PMZ_0020468	Cldn19	scaf_00005	9217517	9223071	684.733	2.34552	0.56389	4.15913	3.19e-05	0.000240024	Cldn19	CLD19	desc=Claudin-19 (Mus musculus)	GO:0005198,GO:0005923,GO:0016021	GO:0043296
PMZ_0020479	PYGO1	scaf_00031	8905470	8906834	387.509	2.6211	0.570045	4.59239	4.38e-06	4.31e-05	PYGO1	PYGO1	desc=Pygopus homolog 1 (Homo sapiens)	GO:0005515	GO:0005634
PMZ_0020514	ITPR1	scaf_00022	8737679	8854767	2451	4.23557	0.613919	6.90213	5.12e-12	2.77e-10	ITPR1		desc=Inositol 1%2C4%2C5-trisphosphate receptor type 1 (Bos taurus)	GO:0005216,GO:0005220,GO:0005262,GO:0005783,GO:0006811,GO:0006816,GO:0016020,GO:0055085,GO:0070588
PMZ_0020521		scaf_00090	273465	314305	1355.45	7.57254	0.525917	14.3477	1.1e-46	2.14e-42	DDB_G0268948	Y8948	desc=Putative methyltransferase DDB_G0268948 (Dictyostelium discoideum)	GO:0008152,GO:0008168	GO:0045335
PMZ_0020557	ADPGK	scaf_00006	2927416	2959878	269	1.79056	0.430885	4.15328	3.28e-05	0.000245049	ADPGK	ADPGK	desc=ADP-dependent glucokinase (Bos taurus)	GO:0005975,GO:0016773	GO:0005576
PMZ_0020607	BACE1	scaf_00030	8140919	8164946	692.515	3.21753	0.462382	6.95707	3.47e-12	2e-10	BACE1		desc=Beta-secretase 1 (Cavia porcellus)	GO:0004190,GO:0006508
PMZ_0020681	tpx2	scaf_00045	5918161	5939696	4055.48	2.32762	0.53108	4.38053	1.18e-05	0.000101759	tpx2	TPX2	desc=Targeting protein for Xklp2 (Xenopus tropicalis)	GO:0005819,GO:0005874,GO:0007067	GO:0005737
PMZ_0020742	CTDP1	scaf_00045	6371870	6389895	442.929	1.68835	0.409044	4.12676	3.68e-05	0.000270774	CTDP1	CTDP1	desc=RNA polymerase II subunit A C-terminal domain phosphatase (Homo sapiens)	GO:0004721,GO:0005515,GO:0005634	GO:0015629
PMZ_0020760	CYP7B1	scaf_00003	2000467	2014361	165.218	3.17201	0.910483	3.48644	0.000489504	0.00245764	CYP7B1	CP7B1	desc=25-hydroxycholesterol 7-alpha-hydroxylase (Homo sapiens)	GO:0004497,GO:0005506,GO:0016705,GO:0020037,GO:0055114	GO:0005789
PMZ_0020779	CBS	scaf_00030	3182851	3209898	1175.62	2.73856	0.784817	3.49511	0.00047386	0.00239022	CBS		desc=Cystathionine beta-synthase (Homo sapiens)
PMZ_0020845	Ino80d	scaf_00035	7770896	7788202	1637.58	2.47569	0.627749	3.93938	8.17e-05	0.000536477	Ino80d		desc=INO80 complex subunit D (Mus musculus)
PMZ_0020873		scaf_00003	24715582	24726045	2337.07	2.24783	0.545671	4.11099	3.94e-05	0.000287485				GO:0005515
PMZ_0020931	ZP2	scaf_00200	214119	224492	14458.3	6.33364	0.989805	6.36592	1.94e-10	6.83e-09	ZP2	ZP1/ZP4	desc=Zona pellucida sperm-binding protein 2 (Canis familiaris)		GO:0016021
PMZ_0020949		scaf_02184	6546	16639	38.2832	3.44321	0.654717	5.23876	1.62e-07	2.49e-06
PMZ_0021031	pafah1b1	scaf_00038	9098269	9107412	1645.36	2.4504	0.446323	5.48739	4.08e-08	7.54e-07	pafah1b1	LIS1	desc=Lissencephaly-1 homolog (Tetraodon nigroviridis)	GO:0005515	GO:0005737
PMZ_0021089	ELANE	scaf_00349	67500	75187	540.135	3.31906	0.80899	4.10794	3.99e-05	0.000290538	ELANE	KLK14/TRY1	desc=Neutrophil elastase (Homo sapiens)	GO:0004252,GO:0006508	GO:0005615
PMZ_0021179	pif1	scaf_00015	13906877	13919746	584.433	3.07734	0.442757	6.94783	3.71e-12	2.11e-10	pif1	PIF1	desc=ATP-dependent DNA helicase PIF1 (Xenopus laevis)	GO:0000723,GO:0003678,GO:0006281	GO:0005739
PMZ_0021267	EFTUD2	scaf_00053	2421094	2475903	2970.28	1.88131	0.448509	4.19364	2.75e-05	0.000211436	EFTUD2	U5S1	desc=116 kDa U5 small nuclear ribonucleoprotein component (Gallus gallus)	GO:0003924,GO:0005525	GO:0015030
PMZ_0021278	St5	scaf_00014	11711373	11718334	24.6034	2.67107	0.845307	3.14642	0.0016528	0.00686166	St5		desc=Suppression of tumorigenicity 5 protein (Mus musculus)
PMZ_0021297	VAC14	scaf_00084	1208300	1254657	2023.22	1.93377	0.461023	4.19396	2.74e-05	0.000211306	VAC14	VAC14	desc=Protein VAC14 homolog (Gallus gallus)	GO:0005488,GO:0043550,GO:0070772	GO:0010008
PMZ_0021304	s100a1	scaf_00076	2109092	2110637	56.8364	3.54743	0.738721	4.79449	1.63e-06	1.83e-05	s100a1		desc=Protein S100-A1 (Misgurnus fossilis)
PMZ_0021326	Abhd14b	scaf_00079	1465155	1475171	290.369	1.78926	0.461954	3.87793	0.00010535	0.000667891	Abhd14b	ABHEB	desc=Alpha/beta hydrolase domain-containing protein 14B (Mus musculus)		GO:0005737
PMZ_0021497	TTPAL	scaf_00002	8802532	8820333	1297.04	2.71123	0.401785	6.74483	1.53e-11	7.21e-10	TTPAL	TTPAL	desc=Alpha-tocopherol transfer protein-like (Homo sapiens)	GO:0005215,GO:0005622,GO:0006810	GO:0005622
PMZ_0021584	Ggnbp2	scaf_00038	7471625	7492240	9083.62	1.42404	0.46599	3.0499	0.00228919	0.00896702	Ggnbp2	GGNB2	desc=Gametogenetin-binding protein 2 (Mus musculus)		GO:0005737
PMZ_0021589	TCF7L2	scaf_00012	5553890	5583603	121.206	2.67644	0.586558	4.56588	4.97e-06	4.82e-05	TCF7L2	TF7L2	desc=Transcription factor 7-like 2 (Homo sapiens)	GO:0016055	GO:0070369
PMZ_0021658		scaf_00229	153231	160984	40203.6	2.40471	0.637947	3.76352	0.000167541	0.000988604			Note=Similar to Tubulin beta-1 chain (Manduca sexta)	GO:0003924,GO:0005200,GO:0005525,GO:0005874,GO:0007017
PMZ_0021742	DVL3	scaf_03456	1207	8646	194.313	1.51454	0.444142	3.40781	0.000654876	0.00314812	DVL3		desc=Segment polarity protein dishevelled homolog DVL-3 (Homo sapiens)	GO:0005515,GO:0016055
PMZ_0021746		scaf_00006	15086185	15094512	1356.28	2.34233	0.427035	5.48688	4.09e-08	7.55e-07			Note=Protein of unknown function
PMZ_0021860	s100a1	scaf_00041	8919683	8920538	8460.11	4.85326	1.16593	4.11446	3.88e-05	0.000283623	s100a1		desc=Protein S100-A1 (Misgurnus fossilis)
PMZ_0021861	Creld1	scaf_03910	1385	7282	390.893	3.29477	0.526788	6.25636	3.94e-10	1.29e-08	Creld1	CREL1	desc=Cysteine-rich with EGF-like domain protein 1 (Mus musculus)	GO:0005509,GO:0005515	GO:0016021
PMZ_0021887	BCL7A	scaf_00073	2702299	2720631	128.158	2.40031	0.549214	4.36883	1.25e-05	0.000106375	BCL7A	BCL7A	desc=B-cell CLL/lymphoma 7 protein family member A (Homo sapiens)
PMZ_0022003		scaf_00070	2414892	2426725	23687.1	3.60717	1.0811	3.32843	0.000873373	0.0040157
PMZ_0022182	STX5	scaf_00041	4447795	4454622	1932.23	1.78814	0.574648	3.10733	0.00188784	0.00766539	STX5		desc=Syntaxin-5 (Bos taurus)	GO:0005484,GO:0005515,GO:0006886,GO:0016020,GO:0016192
PMZ_0022192	vps25	scaf_01692	11907	16954	328.174	2.03792	0.574392	3.55329	0.000380438	0.0019855	vps25	VPS25	desc=Vacuolar protein-sorting-associated protein 25 (Danio rerio)		GO:0005737
PMZ_0022266	ddx55	scaf_00038	2192251	2206601	906.893	1.73101	0.527672	3.28517	0.00101919	0.00458389	ddx55	DDX55	desc=ATP-dependent RNA helicase DDX55 (Danio rerio)	GO:0003676,GO:0005524	GO:0005524
PMZ_0022354	dnajc2	scaf_00049	8430908	8449265	2186.4	1.77815	0.39279	4.53063	5.88e-06	5.56e-05	dnajc2	DNJC2	desc=DnaJ homolog subfamily C member 2 (Danio rerio)		GO:0005829
PMZ_0022361	MICAL3	scaf_00002	19053101	19060469	59.5124	2.07239	0.619299	3.3572	0.000787365	0.00368455	MICAL3	MCA3A	desc=Protein-methionine sulfoxide oxidase MICAL3 (Bos taurus)		GO:0005737
PMZ_0022548	TMEM238	scaf_00019	9570875	9571501	79.5929	3.449	0.635014	5.41648	6.08e-08	1.06e-06	TMEM238	TM238	desc=Transmembrane protein 238 (Homo sapiens)		GO:0016021
PMZ_0022591	USP40	scaf_00100	474642	499245	2465.69	2.02512	0.418226	4.84395	1.27e-06	1.46e-05	USP40	UBP40	desc=Ubiquitin carboxyl-terminal hydrolase 40 (Homo sapiens)	GO:0006511,GO:0036459	GO:0008234
PMZ_0022612	TBC1D7	scaf_00001	8844725	8855095	396.131	1.38627	0.390119	3.55346	0.000380195	0.00198476	TBC1D7	TBCD7	desc=TBC1 domain family member 7 (Homo sapiens)		GO:0016023
PMZ_0022632	ABHD12	scaf_00069	116230	133152	504.78	1.17281	0.375843	3.11589	0.00183392	0.00748716	ABHD12	ABD12	desc=Monoacylglycerol lipase ABHD12 (Bos taurus)		GO:0032281
PMZ_0022635	Lman2l	scaf_00018	583139	588303	563.857	2.05337	0.519137	3.95647	7.61e-05	0.000504808	Lman2l	LMA2L	desc=VIP36-like protein (Mus musculus)	GO:0016020	GO:0005789
PMZ_0022702		scaf_00031	7670530	7698897	852.474	7.11498	0.862791	8.19503	2.51e-16	3.43e-14
PMZ_0022713	GALNT18	scaf_00064	360273	373971	105.791	2.97366	0.585202	5.08363	3.7e-07	5.02e-06	GALNT18		desc=Polypeptide N-acetylgalactosaminyltransferase 18 (Homo sapiens)
PMZ_0022727	DMBT1	scaf_02543	16553	18775	8797.88	5.12705	1.04749	4.86644	1.14e-06	1.33e-05	DMBT1	DMBT1	desc=Deleted in malignant brain tumors 1 protein (Homo sapiens)		GO:0005737
PMZ_0022770	Tacstd2	scaf_00139	39058	52435	5883.39	2.79803	0.650004	4.31015	1.63e-05	0.000134794	Tacstd2	TACD2/EPCAM	desc=Tumor-associated calcium signal transducer 2 (Mus musculus)		GO:0016324
PMZ_0022800	PLEKHJ1	scaf_00043	135186	140885	2155.75	4.31088	0.567297	7.5997	2.97e-14	2.54e-12	PLEKHJ1	PKHJ1	desc=Pleckstrin homology domain-containing family J member 1 (Gallus gallus)
PMZ_0022866	Prox1	scaf_00268	97401	109705	1106.5	1.31065	0.403984	3.24195	0.00118715	0.00521023	Prox1		desc=Prospero homeobox protein 1 (Mus musculus)	GO:0003677,GO:0005634,GO:0006355,GO:0007275
PMZ_0022953	B3GNT3	scaf_03234	9199	14665	105.228	3.71521	0.64003	5.7963	6.78e-09	1.55e-07	B3GNT3	B3GN3	desc=N-acetyllactosaminide beta-1%2C3-N-acetylglucosaminyltransferase 3 (Homo sapiens)	GO:0006486,GO:0008378,GO:0016020	GO:0000139
PMZ_0023196	rnf8	scaf_00041	4881999	4886733	719.08	2.80602	0.429928	6.52514	6.79e-11	2.77e-09	rnf8		desc=E3 ubiquitin-protein ligase RNF8 (Danio rerio)	GO:0005515,GO:0008270
PMZ_0023284	FAM46A	scaf_00050	5852122	5865012	492.937	4.02266	0.792188	5.07043	3.97e-07	5.31e-06	FAM46A	FA46A	desc=Protein FAM46A (Homo sapiens)		GO:0044822
PMZ_0023411	ZP3	scaf_05890	5768	10497	1624.84	5.67928	0.973982	5.80639	6.38e-09	1.47e-07	ZP3	ZP3	desc=Zona pellucida sperm-binding protein 3 (Gallus gallus)		GO:0016021
PMZ_0023457	Kif2c	scaf_03381	1089	12444	80.5987	2.73751	0.562483	4.86013	1.17e-06	1.36e-05	Kif2c	KIF2A	desc=Kinesin-like protein KIF2C (Mus musculus)	GO:0003777,GO:0005524,GO:0005871,GO:0007018,GO:0008017	GO:0005737
PMZ_0023470		scaf_00126	446446	459442	33024.9	5.00996	1.07206	4.6426	3.44e-06	3.52e-05	zgc:113413	TTL	desc=Natterin-like protein (Danio rerio)
PMZ_0023524	MINA	scaf_01860	5122	11606	168.456	2.79158	0.452159	6.1687	6.89e-10	2.11e-08	MINA	MI	desc=Bifunctional lysine-specific demethylase and histidyl-hydroxylase MINA (Homo sapiens)		GO:0005730
PMZ_0023526	Foxred2	scaf_00190	181848	196762	568.829	2.97362	0.563719	5.2807	1.29e-07	2.04e-06	Foxred2	FXRD2	desc=FAD-dependent oxidoreductase domain-containing protein 2 (Mus musculus)	GO:0016491,GO:0055114	GO:0005788
PMZ_0023557	ZNF70	scaf_00041	9875901	9886318	482.482	2.61089	0.43666	5.97813	2.26e-09	5.97e-08	ZNF70		desc=Zinc finger protein 70 (Homo sapiens)	GO:0003676,GO:0046872
PMZ_0023777		scaf_00042	4882472	4892485	3352.71	6.91471	0.824628	8.36695	5.91e-17	9.34e-15
PMZ_0023793	Srbd1	scaf_04961	2532	11453	72.052	2.60085	0.646486	4.01643	5.91e-05	0.000404421	Srbd1		desc=S1 RNA-binding domain-containing protein 1 (Mus musculus)	GO:0003676
PMZ_0023825	IMP4	scaf_00065	3040495	3043510	836.371	1.69518	0.492334	3.44781	0.000565146	0.00277993	IMP4		desc=U3 small nucleolar ribonucleoprotein protein IMP4 (Homo sapiens)
PMZ_0023876	DMBT1	scaf_02615	98	2331	12081.3	4.80947	1.13958	4.17807	2.94e-05	0.000223957	DMBT1	DMBT1	desc=Deleted in malignant brain tumors 1 protein (Homo sapiens)		GO:0005737
PMZ_0024070	Hsp90aa1	scaf_05139	10237	12070	383.036	2.71026	0.620757	4.36182	1.29e-05	0.000109363	Hsp90aa1	HS90A	desc=Heat shock protein HSP 90-alpha (Mus musculus)	GO:0005524,GO:0006457,GO:0006950,GO:0051082	GO:0042470
PMZ_0024111	CTSL	scaf_00031	3574960	3586565	2921.16	1.87486	0.449253	4.19383	2.74e-05	0.000211347	CTSL	CATL1	desc=Cathepsin L1 (Chlorocebus aethiops)	GO:0006508,GO:0008234
PMZ_0025021	C7orf25	scaf_00021	5958572	5962518	614.302	1.92696	0.543006	3.54555	0.000391795	0.00203166	C7orf25	CG025	desc=UPF0415 protein C7orf25 (Homo sapiens)
PMZ_0026005	SERPINB1	scaf_00045	5428180	5452368	246.088	4.70719	0.824131	5.69514	1.23e-08	2.65e-07	SERPINB1	ILEU	desc=Leukocyte elastase inhibitor (Equus caballus)	GO:0004867,GO:0005615	GO:0005737
PMZ_0026023	PTPN12	scaf_00010	7239754	7297996	1094.89	1.35907	0.380649	3.56965	0.000357454	0.00188019	PTPN12	PTN12	desc=Tyrosine-protein phosphatase non-receptor type 12 (Homo sapiens)	GO:0004725,GO:0006470,GO:0016311,GO:0016791	GO:0030054
PMZ_0026028	GVINP1	scaf_03644	1739	6767	21.8679	2.98751	0.881551	3.37043	0.000750514	0.00354714	GVINP1	GVIN1	desc=Interferon-induced very large GTPase 1 (Homo sapiens)	GO:0005525	GO:0005829
PMZ_0026033	KL	scaf_00067	3134159	3148554	380.371	2.94739	0.718189	4.09502	4.22e-05	0.000305399	KL		desc=Klotho (Macaca fascicularis)	GO:0004553,GO:0005975
PMZ_0026034	Prkd2	scaf_00025	10044890	10091870	131.165	2.23937	0.485215	4.6162	3.91e-06	3.92e-05	Prkd2	KPCD3	desc=Serine/threonine-protein kinase D2 (Rattus norvegicus)	GO:0004672,GO:0004697,GO:0005524,GO:0006468,GO:0016772	GO:0005737
PMZ_0026037		scaf_00014	8257660	8288726	7327.23	5.98679	0.925317	6.45231	1.1e-10	4.2e-09			Note=Similar to Intestinal mucin-like protein (Fragment) (Rattus norvegicus)	GO:0005515
PMZ_0026043	PDZD8	scaf_00015	8183247	8206727	2046.62	1.82453	0.329372	5.53654	3.09e-08	5.89e-07	PDZD8	PDZD8	desc=PDZ domain-containing protein 8 (Homo sapiens)	GO:0005515,GO:0035556	GO:0016020
PMZ_0026050	Nup107	scaf_00015	8677329	8706109	5453.68	1.3783	0.372455	3.69809	0.000217232	0.0012342	Nup107	NU107	desc=Nuclear pore complex protein Nup107 (Rattus norvegicus)	GO:0005643,GO:0006810	GO:0005813
PMZ_0026078	Casd1	scaf_00016	10712174	10733125	496.496	1.64457	0.509936	3.22075	0.00127855	0.00554493	Casd1	CASD1	desc=CAS1 domain-containing protein 1 (Mus musculus)		GO:0016021
PMZ_0026117	C10orf76	scaf_00015	13346124	13453101	1016.84	1.93694	0.405655	4.77457	1.8e-06	2e-05	C10orf76	CJ076	desc=UPF0668 protein C10orf76 (Homo sapiens)		GO:0016021
PMZ_0026146	Nub1	scaf_00028	2238357	2255844	547.096	2.16719	0.488062	4.43849	9.06e-06	8.08e-05	Nub1	NUB1	desc=NEDD8 ultimate buster 1 (Mus musculus)	GO:0005515	GO:0005737
PMZ_0026158	cwf19l2	scaf_00021	2893535	2920145	1505.27	1.46416	0.38496	3.80338	0.000142735	0.000862665	cwf19l2	C19L2	desc=CWF19-like protein 2 (Danio rerio)		GO:0003824
PMZ_0026176	ZP3	scaf_02353	2078	10519	678.765	4.07162	0.917602	4.43838	9.06e-06	8.08e-05	ZP3	ZP3	desc=Zona pellucida sperm-binding protein 3 (Gallus gallus)		GO:0016021
PMZ_0026188	GBF1	scaf_00012	4902434	4942566	1764.46	1.6738	0.512862	3.25843	0.00112031	0.00494809	GBF1	GBF1	desc=Golgi-specific brefeldin A-resistance guanine nucleotide exchange factor 1 (Cricetulus griseus)	GO:0005086,GO:0032012	GO:0005086
PMZ_0026192	ZDHHC17	scaf_00161	135717	161793	331.04	3.5832	0.81191	4.41421	1.01e-05	8.89e-05	ZDHHC17		desc=Palmitoyltransferase ZDHHC17 (Homo sapiens)	GO:0005515,GO:0015095,GO:0016409
PMZ_0026196	farsa	scaf_00023	2699179	2722125	1509.4	1.86038	0.517339	3.59421	0.000325373	0.00173445	farsa	SYFA/SYFAA	desc=Phenylalanine--tRNA ligase alpha subunit (Danio rerio)	GO:0000049,GO:0004812,GO:0005524,GO:0005737,GO:0043039	GO:0005737
PMZ_0026198	IPO13	scaf_00023	2871489	2878274	152.313	2.17557	0.665826	3.26018	0.00111343	0.00492674	IPO13	IPO13	desc=Importin-13 (Homo sapiens)	GO:0005488,GO:0006886,GO:0008536	GO:0005737
PMZ_0026208	TTC31	scaf_00018	8428967	8468797	457.769	1.41422	0.461393	3.06504	0.00217638	0.00861372	TTC31	TTC31	desc=Tetratricopeptide repeat protein 31 (Homo sapiens)	GO:0000166,GO:0003676,GO:0005515,GO:0046872
PMZ_0026259	PPFIA2	scaf_00014	5954889	5976294	121.263	1.49273	0.475637	3.14026	0.00168801	0.00698541	PPFIA2		desc=Liprin-alpha-2 (Homo sapiens)
PMZ_0026264	NAA50	scaf_00030	6627585	6630689	2296.88	2.16073	0.404307	5.35193	8.7e-08	1.46e-06	NAA50		desc=N-alpha-acetyltransferase 50 (Bos taurus)	GO:0008080
PMZ_0026305	SUV420H1	scaf_00002	23070676	23086426	814.64	2.31839	0.677056	3.42723	0.000609772	0.00296714	SUV420H1	SV421	desc=Histone-lysine N-methyltransferase SUV420H1 (Bos taurus)		GO:0005694
PMZ_0026327	arc1	scaf_00019	7894925	7913574	18.7935	2.90448	0.887357	3.24897	0.00115823	0.00509248	arc1	ARC1B	desc=Actin-related protein 2/3 complex subunit 1 (Schizosaccharomyces pombe (strain 972 / ATCC 24843))	GO:0005515,GO:0005885,GO:0015629,GO:0030833,GO:0034314	GO:0005856
PMZ_0026338		scaf_00001	25533091	25545117	965.56	2.276	0.542248	4.18674	2.83e-05	0.000216844		WDR34	Note=Protein of unknown function		GO:0005930
PMZ_0026350	PARN	scaf_00003	9250579	9279183	1391.05	1.54833	0.508133	3.0445	0.00233066	0.0091056	PARN	PARN	desc=Poly(A)-specific ribonuclease PARN (Bos taurus)	GO:0000166,GO:0003676,GO:0003723,GO:0004535,GO:0005634,GO:0005737,GO:0006402,GO:0046872	GO:0005737
PMZ_0026356	LMBR1	scaf_00005	6950800	6964654	154.45	1.78983	0.541339	3.30642	0.000944947	0.00429403	LMBR1	LMBR1	desc=Limb region 1 protein homolog (Gallus gallus)		GO:0016021
PMZ_0026408	fam171a1	scaf_00028	7875512	7889889	1760.27	2.98698	0.478042	6.25263	4.04e-10	1.31e-08	fam171a1	F1711	desc=Protein FAM171A1 (Xenopus laevis)		GO:0016021
PMZ_0026426	DAPK1	scaf_00013	8018505	8089061	2580.38	1.66451	0.471462	3.53016	0.000415309	0.0021331	DAPK1	DAPK1	desc=Death-associated protein kinase 1 (Homo sapiens)	GO:0004672,GO:0005515,GO:0005524,GO:0006468,GO:0007165,GO:0016772	GO:0015629
PMZ_0026432	TMEM200A	scaf_00002	1135532	1137088	161.511	4.78117	0.641716	7.43081	1.08e-13	8.49e-12	TMEM200A	T200A	desc=Transmembrane protein 200A (Homo sapiens)		GO:0016021
PMZ_0026450	Prc1	scaf_00015	5226883	5238327	298.824	2.76767	0.549991	5.02816	4.95e-07	6.44e-06	Prc1	PRC1	desc=Protein regulator of cytokinesis 1 (Mus musculus)	GO:0000226,GO:0000910,GO:0008017	GO:0005737
PMZ_0026479	Mocs1	scaf_00088	1062234	1070334	1078.39	1.52138	0.437712	3.47558	0.000509758	0.00254159	Mocs1		desc=Molybdenum cofactor biosynthesis protein 1 (Mus musculus)	GO:0003824,GO:0046872,GO:0051536,GO:0051539
PMZ_0026510	Pnpt1	scaf_00036	6828261	6848537	1799.08	2.73891	0.562755	4.86902	1.12e-06	1.31e-05	Pnpt1	PNPT1	desc=Polyribonucleotide nucleotidyltransferase 1%2C mitochondrial (Mus musculus)	GO:0000175,GO:0003723,GO:0004654,GO:0006396,GO:0006402	GO:0005737
PMZ_0026512	PPP2R5C	scaf_00029	6859058	6869970	1931.6	2.41547	0.473456	5.09881	3.42e-07	4.7e-06	PPP2R5C	2A5G	desc=Serine/threonine-protein phosphatase 2A 56 kDa regulatory subunit gamma isoform (Homo sapiens)	GO:0000159,GO:0005488,GO:0007165,GO:0008601	GO:0000775
PMZ_0026546	Maob	scaf_00016	15637839	15688972	1378.51	1.8027	0.425519	4.23996	2.24e-05	0.000176745	Maob	AOFA/AOFB	desc=Amine oxidase [flavin-containing] B (Mus musculus)	GO:0016491,GO:0055114	GO:0070062
PMZ_0026575	TXNDC16	scaf_00029	10159152	10184182	1361.36	2.29945	0.537256	4.27814	1.88e-05	0.000152406	TXNDC16	TXD16	desc=Thioredoxin domain-containing protein 16 (Homo sapiens)		GO:0005788
PMZ_0026576	Brsk1	scaf_00014	10997847	11079871	253.224	1.9906	0.488436	4.07925	4.52e-05	0.000323977	Brsk1		desc=Serine/threonine-protein kinase BRSK1 (Mus musculus)	GO:0004672,GO:0005524,GO:0006468,GO:0016772
PMZ_0026596	Ppme1	scaf_00021	2564471	2570144	646.769	1.34015	0.411531	3.25517	0.00113323	0.00499457	Ppme1	PPME1	desc=Protein phosphatase methylesterase 1 (Mus musculus)	GO:0006482,GO:0052689	GO:0051722
PMZ_0026602	ARMC9	scaf_00023	236101	260895	3868.52	1.17507	0.347308	3.3828	0.000717496	0.0034069	ARMC9	ARMC9	desc=LisH domain-containing protein ARMC9 (Homo sapiens)	GO:0005488,GO:0005515	GO:0070062
PMZ_0026611	Trmt112	scaf_00029	6933263	6962487	4326.33	1.92799	0.547177	3.5279	0.000418871	0.00214742	Trmt112	LLR1	desc=Multifunctional methyltransferase subunit TRM112-like protein (Mus musculus)		GO:0016567
PMZ_0026633	SLC4A2	scaf_00016	6936595	6970026	956.525	2.34243	0.663518	3.52178	0.000428662	0.00218837	SLC4A2	B3A2	desc=Anion exchange protein 2 (Oryctolagus cuniculus)	GO:0005215,GO:0005452,GO:0006810,GO:0006820,GO:0008509,GO:0016020,GO:0016021	GO:0016323
PMZ_0026643	cwc22	scaf_00028	8246978	8330652	2227.14	2.06244	0.344281	5.9911	2.08e-09	5.57e-08	cwc22	CWC22	desc=Pre-mRNA-splicing factor CWC22 homolog (Danio rerio)	GO:0003723,GO:0005488,GO:0005515	GO:0071013
PMZ_0026651	KIF16B	scaf_00088	526361	539538	4106.67	3.05966	0.482949	6.33148	2.43e-10	8.39e-09	KIF16B		desc=Kinesin-like protein KIF16B (Homo sapiens)	GO:0003777,GO:0005515,GO:0005524,GO:0005871,GO:0007018,GO:0008017
PMZ_0026679	COG7	scaf_00003	6773578	6795861	4451.7	2.00754	0.509101	3.94233	8.07e-05	0.000530858	COG7	COG7	desc=Conserved oligomeric Golgi complex subunit 7 (Bos taurus)	GO:0006886,GO:0017119	GO:0005794
PMZ_0026695	Taf6l	scaf_00029	5925547	5934102	1995.83	1.01085	0.318447	3.17301	0.00150866	0.00637219	Taf6l	TAF6L	desc=TAF6-like RNA polymerase II p300/CBP-associated factor-associated factor 65 kDa subunit 6L (Mus musculus)	GO:0005634,GO:0006352,GO:0046982,GO:0051090	GO:0005634
PMZ_0026746	Cdk2	scaf_00016	7099516	7110758	4651.06	1.51552	0.494843	3.06221	0.00219707	0.00867969	Cdk2	CDK2	desc=Cyclin-dependent kinase 2 (Rattus norvegicus)	GO:0004672,GO:0005524,GO:0006468,GO:0016772	GO:0015030
PMZ_0026749	chtf18	scaf_00011	4437907	4463847	1412.22	2.24159	0.595535	3.75788	0.000171358	0.00100806	chtf18	CTF18	desc=Chromosome transmission fidelity protein 18 homolog (Xenopus laevis)	GO:0005524	GO:0005634
PMZ_0026761	taf6	scaf_00004	2232117	2248457	720.903	2.49165	0.594885	4.18017	2.91e-05	0.000222242	taf6	TAF6	desc=Transcription initiation factor TFIID subunit 6 (Xenopus laevis)	GO:0005634,GO:0051090	GO:0071339
PMZ_0026763	Kif5b	scaf_00016	3720964	3756709	6535.23	2.82951	0.440102	6.42558	1.31e-10	4.91e-09	Kif5b	KINH	desc=Kinesin-1 heavy chain (Rattus norvegicus)	GO:0003777,GO:0005524,GO:0005871,GO:0007018,GO:0008017	GO:0035253
PMZ_0026765	C20orf194	scaf_00015	11824406	11872986	2479.58	3.23729	0.781904	4.12662	3.68e-05	0.000270774	C20orf194	CT194	desc=Uncharacterized protein C20orf194 (Homo sapiens)
PMZ_0026766	CDC23	scaf_00015	11813020	11822194	1443.21	1.90305	0.49971	3.80795	0.000140125	0.000850071	CDC23	CDC23	desc=Cell division cycle protein 23 homolog (Bos taurus)	GO:0005515,GO:0005680,GO:0030071	GO:0005680
PMZ_0026789	Tmprss6	scaf_00020	9640465	9698859	1466.16	2.24157	0.452365	4.95353	7.29e-07	8.93e-06	Tmprss6	TMPS6	desc=Transmembrane protease serine 6 (Mus musculus)	GO:0004252,GO:0004672,GO:0005515,GO:0005524,GO:0006468,GO:0006508,GO:0016772	GO:0016021
PMZ_0026824	Rab21	scaf_00014	2692352	2727010	2789.52	1.37707	0.446762	3.07878	0.00207851	0.00828208	Rab21		desc=Ras-related protein Rab-21 (Mus musculus)	GO:0005525,GO:0005622,GO:0007165,GO:0007264,GO:0015031,GO:0016020
PMZ_0026864	EIF2AK3	scaf_00015	10079116	10108181	2363.07	2.20358	0.493609	4.46092	8.16e-06	7.37e-05	EIF2AK3	E2AK3	desc=Eukaryotic translation initiation factor 2-alpha kinase 3 (Homo sapiens)	GO:0005524,GO:0016772	GO:0005737
PMZ_0026890	lsg1	scaf_00048	6577003	6581675	382.609	2.20336	0.552258	3.98496	6.75e-05	0.000454895	lsg1	LSG1	desc=Large subunit GTPase 1 homolog (Danio rerio)		GO:0015030
PMZ_0026899	Faim2	scaf_00004	13638188	13650695	1859.93	1.57645	0.520575	3.02506	0.00248585	0.00960183	Faim2	LFG2	desc=Protein lifeguard 2 (Rattus norvegicus)		GO:0030054
PMZ_0026916	PAPOLA	scaf_00009	16696838	16720099	346.117	4.04068	0.962834	4.18922	2.8e-05	0.000215255	PAPOLA		desc=Poly(A) polymerase alpha (Bos taurus)	GO:0003723,GO:0004652,GO:0005634,GO:0016779,GO:0031123,GO:0043631
PMZ_0026942	NCDN	scaf_00003	3000780	3009683	2629.66	2.69557	0.501699	5.38162	7.38e-08	1.26e-06	NCDN	NCDN	desc=Neurochondrin (Gallus gallus)		GO:0005829
PMZ_0026990	wdr75	scaf_00028	7172145	7201306	1254.44	1.80989	0.40388	4.48334	7.35e-06	6.75e-05	wdr75	WDR75	desc=WD repeat-containing protein 75 (Xenopus laevis)	GO:0005515	GO:0005730
PMZ_0026991	Capn8	scaf_00029	11916272	11925374	42.9432	6.21055	0.871914	6.76128	1.37e-11	6.58e-10	Capn8	CAN8	desc=Calpain-8 (Rattus norvegicus)	GO:0004198,GO:0005509,GO:0005622,GO:0006508	GO:0005737
PMZ_0027005	kif15	scaf_00045	1946066	1980475	4419.92	2.59086	0.63112	4.10132	4.11e-05	0.000297973	kif15	KIF15/KI15B	desc=Kinesin-like protein KIF15-B (Xenopus laevis)	GO:0003777,GO:0005524,GO:0005871,GO:0007018,GO:0008017	GO:0005813
PMZ_0027024	pi4kb	scaf_00031	8922087	8960759	605.083	2.41873	0.489422	4.93874	7.86e-07	9.55e-06	pi4kb	PI4KB	desc=Phosphatidylinositol 4-kinase beta (Danio rerio)	GO:0004430,GO:0006661,GO:0016772,GO:0016773,GO:0046854,GO:0048015	GO:0005741
PMZ_0027052	trim71	scaf_00005	2725709	2730887	68.856	3.75934	1.0925	3.42242	0.000620673	0.00300957	trim71	NHL1	desc=E3 ubiquitin-protein ligase TRIM71 (Danio rerio)	GO:0005515	GO:0004842
PMZ_0027059	NCKAP1	scaf_00035	11572530	11606068	4992.2	1.58303	0.342058	4.62811	3.69e-06	3.74e-05	NCKAP1		desc=Nck-associated protein 1 (Homo sapiens)
PMZ_0027077	Kdm4b	scaf_00023	4306370	4340178	5766.99	2.06258	0.498606	4.13276	3.58e-05	0.000264641	Kdm4b	KDM4B	desc=Lysine-specific demethylase 4B (Mus musculus)		GO:0005925
PMZ_0027089	Llgl1	scaf_00019	400803	462317	1002.16	1.28623	0.348764	3.68852	0.000225566	0.00127335	Llgl1	L2GL1/L2GL2	desc=Lethal(2) giant larvae protein homolog 1 (Rattus norvegicus)	GO:0005515	GO:0005737
PMZ_0027102	PALD1	scaf_00012	14979536	15031006	1048.86	1.87876	0.520439	3.60554	0.000311503	0.00167246	PALD1	PALD	desc=Paladin (Homo sapiens)		GO:0005829
PMZ_0027126	Flna	scaf_00022	4327460	4370606	18373.8	1.98319	0.656431	3.02206	0.00251063	0.00968213	Flna		desc=Filamin-A (Mus musculus)	GO:0005515,GO:0051015
PMZ_0027142	ARFGAP2	scaf_00055	1334908	1358179	2119.92	1.3127	0.332956	3.94357	8.03e-05	0.000528743	ARFGAP2	ARFG3	desc=ADP-ribosylation factor GTPase-activating protein 2 (Bos taurus)		GO:0000139
PMZ_0027149	ALOX5	scaf_00019	11515868	11528819	132.943	3.23307	0.748551	4.32119	1.55e-05	0.000128826	ALOX5	LOX5	desc=Arachidonate 5-lipoxygenase (Mesocricetus auratus)	GO:0016702,GO:0046872,GO:0055114	GO:0005829
PMZ_0027154	DGKQ	scaf_00015	2200357	2278199	450.629	2.15934	0.521559	4.14072	3.46e-05	0.00025698	DGKQ	DGKQ	desc=Diacylglycerol kinase theta (Homo sapiens)	GO:0004143,GO:0007165,GO:0007205,GO:0016301,GO:0035556,GO:0047134,GO:0055114	GO:0005856
PMZ_0027157	Ano8	scaf_00031	5580606	5613303	138.185	1.56564	0.502455	3.1153	0.00183756	0.00750042	Ano8	ANO8	desc=Anoctamin-8 (Mus musculus)		GO:0016021
PMZ_0027172	Scarb2	scaf_00020	9586200	9608832	759.342	2.50172	0.507379	4.93012	8.22e-07	9.93e-06	Scarb2	SCRB2	desc=Lysosome membrane protein 2 (Rattus norvegicus)	GO:0007155,GO:0016020	GO:0070062
PMZ_0027204	BCL10	scaf_00024	7744071	7751664	1306.6	2.67155	0.598078	4.46961	7.84e-06	7.11e-05	BCL10	BCL10	desc=B-cell lymphoma/leukemia 10 (Homo sapiens)	GO:0042981	GO:0032449
PMZ_0027247	gtf2f1	scaf_00023	5718378	5727624	960.308	1.03457	0.311396	3.31973	0.000901053	0.00412319	gtf2f1	T2FA	desc=General transcription factor IIF subunit 1 (Xenopus laevis)	GO:0003677,GO:0003824,GO:0005634,GO:0006367,GO:0032968	GO:0005634
PMZ_0027286	BIN3	scaf_00018	11139543	11183449	239.6	1.34823	0.345488	3.90047	9.6e-05	0.000616914	BIN3	BIN3	desc=Bridging integrator 3 (Homo sapiens)	GO:0005515,GO:0005737	GO:0005737
PMZ_0027295	Ano7	scaf_00048	7136746	7154709	1210.78	4.39692	0.487905	9.00646	2.13e-19	4.54e-17	Ano7	ANO7	desc=Anoctamin-7 (Mus musculus)		GO:0030054
PMZ_0027342	stag1	scaf_00055	2204754	2235646	1546.83	2.40137	0.776619	3.08118	0.00206179	0.00822893	stag1	STAG2/STAG1	desc=Cohesin subunit SA-1 (Xenopus laevis)		GO:0030054
PMZ_0027354	PWP1	scaf_00014	11628468	11639446	278.754	1.68052	0.516667	3.24857	0.00115987	0.00509854	PWP1		desc=Periodic tryptophan protein 1 homolog (Bos taurus)
PMZ_0027360	Nup153	scaf_00017	12054828	12102174	3204.72	1.68477	0.457077	3.68679	0.000227097	0.00128051	Nup153	NU153	desc=Nuclear pore complex protein Nup153 (Drosophila melanogaster)	GO:0008270	GO:0031965
PMZ_0027367	MED1	scaf_00004	12057856	12076188	850.017	1.74256	0.496202	3.50795	0.000451578	0.00229271	MED1	MED1	desc=Mediator of RNA polymerase II transcription subunit 1 (Homo sapiens)	GO:0001104,GO:0006357,GO:0016592	GO:0000785
PMZ_0027406	FZR1	scaf_00043	2805767	2825813	3404.16	1.03435	0.342566	3.01887	0.00253716	0.00976974	FZR1	FZR	desc=Fizzy-related protein homolog (Homo sapiens)	GO:0005515	GO:0005680
PMZ_0027414	GRK7	scaf_00061	2858391	2867627	59.655	4.70357	1.16429	3.99299	6.52e-05	0.000442208	GRK7	GRK7	desc=G protein-coupled receptor kinase 7 (Spermophilus tridecemlineatus)	GO:0004672,GO:0004674,GO:0004703,GO:0005524,GO:0006468,GO:0007165,GO:0016772,GO:0038032	GO:0016020
PMZ_0027440	Eif2d	scaf_00074	1609948	1638693	195.542	1.87659	0.458314	4.09462	4.23e-05	0.000305805	Eif2d		desc=Eukaryotic translation initiation factor 2D (Mus musculus)	GO:0003723
PMZ_0027442	Mettl17	scaf_00008	5399300	5408146	519.048	2.21589	0.517914	4.28127	1.86e-05	0.000150591	Mettl17	MET17	desc=Methyltransferase-like protein 17%2C mitochondrial (Mus musculus)	GO:0005507,GO:0006412,GO:0008168	GO:0005739
PMZ_0027487	slc30a9	scaf_00026	8086512	8125619	2472.66	1.45241	0.444191	3.26696	0.00108708	0.00483909	slc30a9		desc=Zinc transporter 9 (Danio rerio)	GO:0006812,GO:0008324,GO:0016021,GO:0055085
PMZ_0027524		scaf_00021	2343361	2343867	77.1759	2.60868	0.851038	3.07255	0.00212238	0.00843549				GO:0003950
PMZ_0027532	Wdr13	scaf_00040	1742466	1752583	2495.66	1.45215	0.393521	3.69136	0.000223059	0.0012614	Wdr13	WDR13	desc=WD repeat-containing protein 13 (Mus musculus)	GO:0005515	GO:0005737
PMZ_0027576	zgc:113413	scaf_00126	464704	465645	16007.6	3.84935	1.1564	3.30285	0.000957067	0.00434268	zgc:113413	TTL	desc=Natterin-like protein (Danio rerio)
PMZ_0027577	zgc:113413	scaf_00126	470892	471323	16739.9	4.77826	1.41568	3.25159	0.00114763	0.00505047	zgc:113413	TTL	desc=Natterin-like protein (Danio rerio)
PMZ_0027578	zgc:113413	scaf_00126	513924	514865	16529.7	4.80977	1.10283	4.32846	1.5e-05	0.000124934	zgc:113413	TTL	desc=Natterin-like protein (Danio rerio)
PMZ_0027579		scaf_00126	501417	502016	5567.05	5.64787	1.04333	5.37771	7.54e-08	1.29e-06	zgc:113413	TTL	desc=Natterin-like protein (Danio rerio)
PMZ_0027582	USP37	scaf_00005	13806140	13817634	3639.7	2.24882	0.367267	6.12188	9.25e-10	2.71e-08	USP37	UBP37	desc=Ubiquitin carboxyl-terminal hydrolase 37 (Gallus gallus)	GO:0006511,GO:0036459	GO:0004197
PMZ_0027593	ADCK3	scaf_00009	4613993	4633981	2306.19	1.64956	0.433564	3.80337	0.000142742	0.000862665	ADCK3		desc=Atypical kinase ADCK3%2C mitochondrial (Bos taurus)	GO:0016772
PMZ_0027598	slc9a3	scaf_00020	5607756	5708118	236.992	2.81001	0.64439	4.35877	1.31e-05	0.000110753	slc9a3	SL9A3	desc=Sodium/hydrogen exchanger 3 (Triakis scyllium)	GO:0006812,GO:0006814,GO:0006885,GO:0015299,GO:0015385,GO:0016021,GO:0055085	GO:0016324
PMZ_0027664	ZNF554	scaf_00073	1406396	1407119	258.277	4.00152	0.680363	5.87213	4.3e-09	1.05e-07	ZNF554	ZN568	desc=Zinc finger protein 554 (Homo sapiens)	GO:0003676,GO:0046872	GO:0005634
PMZ_0027673	WDR36	scaf_00019	9634052	9642383	283.609	1.62297	0.517615	3.13166	0.00173823	0.00716272	WDR36	WDR36	desc=WD repeat-containing protein 36 (Homo sapiens)	GO:0005515,GO:0006364,GO:0032040	GO:0005730
PMZ_0027686	Dnajc16	scaf_00049	243554	282088	1368.26	2.78733	0.408159	6.82878	8.56e-12	4.4e-10	Dnajc16	DJC16	desc=DnaJ homolog subfamily C member 16 (Mus musculus)	GO:0045454	GO:0016021
PMZ_0027692	GALNT18	scaf_00064	196635	216965	1672.07	3.58295	0.889188	4.02984	5.58e-05	0.000385983	GALNT18		desc=Polypeptide N-acetylgalactosaminyltransferase 18 (Homo sapiens)
PMZ_0027725	Znf507	scaf_00020	8349989	8360052	632.742	2.51354	0.581536	4.31675	1.58e-05	0.00013122	Znf507	ZN507	desc=Zinc finger protein 507 (Mus musculus)	GO:0003676,GO:0046872	GO:0005634
PMZ_0027732	ndufaf7	scaf_00069	1426065	1443691	766.847	1.70258	0.349248	4.87539	1.09e-06	1.28e-05	ndufaf7	NDUF7	desc=NADH dehydrogenase [ubiquinone] complex I%2C assembly factor 7 (Danio rerio)		GO:0005615
PMZ_0027758	Npas3	scaf_00029	4948195	4977912	77.1464	2.58526	0.713646	3.61639	0.000298745	0.00161332	Npas3	NPAS3	desc=Neuronal PAS domain-containing protein 3 (Mus musculus)	GO:0004871,GO:0005515,GO:0007165	GO:0005737
PMZ_0027764	UBR3	scaf_00035	4732630	4798043	1481.07	1.85544	0.55142	3.3573	0.000787075	0.00368408	UBR3		desc=E3 ubiquitin-protein ligase UBR3 (Homo sapiens)
PMZ_0027789	Slc4a11	scaf_00015	11947507	11982738	2424.36	4.64093	0.884926	5.2374	1.63e-07	2.51e-06	Slc4a11	S4A11	desc=Sodium bicarbonate transporter-like protein 11 (Mus musculus)	GO:0005215,GO:0005452,GO:0006810,GO:0006820,GO:0016020,GO:0016021	GO:0016323
PMZ_0027799	METTL9	scaf_00019	9082478	9105050	1424.99	2.4267	0.579727	4.17961	2.92e-05	0.000222621	METTL9	METL9	desc=Methyltransferase-like protein 9 (Homo sapiens)
PMZ_0027822	HPS4	scaf_00038	9232150	9243121	61.9996	2.12146	0.666417	3.18078	0.0014688	0.00624183	HPS4	HPS4	desc=Hermansky-Pudlak syndrome 4 protein (Homo sapiens)		GO:0031085
PMZ_0027834	RIC8A	scaf_00055	4955527	4986225	1720.74	2.57793	0.471311	5.46767	4.56e-08	8.3e-07	RIC8A	RIC8A	desc=Synembryn-A (Gallus gallus)	GO:0005488	GO:0005737
PMZ_0027851	rars2	scaf_00050	3670473	3686988	422.328	1.78322	0.433869	4.11065	3.95e-05	0.000287803	rars2	SYRM	desc=Probable arginine--tRNA ligase%2C mitochondrial (Xenopus laevis)	GO:0000166,GO:0004812,GO:0004814,GO:0005524,GO:0006418,GO:0006420	GO:0005759
PMZ_0027852	ccdc64	scaf_00007	10930604	10970268	387.047	2.51325	0.616174	4.08496	4.41e-05	0.000316931	ccdc64	BICR1	desc=Bicaudal D-related protein 1 (Xenopus tropicalis)		GO:0005813
PMZ_0027858	SLC12A3	scaf_00031	4874450	4893380	432.657	2.06259	0.594827	3.46753	0.000525272	0.0026069	SLC12A3	S12A2	desc=Solute carrier family 12 member 3 (Homo sapiens)	GO:0005215,GO:0006811,GO:0016020	GO:0016324
PMZ_0027866	IP3R	scaf_00022	8716387	8725471	42.9824	3.41929	0.601048	5.66988	1.43e-08	3.02e-07	IP3R		desc=Inositol 1%2C4%2C5-trisphosphate receptor (Patiria pectinifera)
PMZ_0027868	Dpp9	scaf_00031	3636302	3671830	2711.78	1.69252	0.490611	3.44535	0.000570316	0.00280239	Dpp9	DPP9	desc=Dipeptidyl peptidase 9 (Mus musculus)	GO:0006508,GO:0008236,GO:0016020	GO:0005829
PMZ_0027876	AVL9	scaf_00004	9294694	9327519	3986.35	2.23094	0.629019	3.54459	0.000393226	0.00203746	AVL9	AVL9	desc=Late secretory pathway protein AVL9 homolog (Pongo abelii)		GO:0016021
PMZ_0027894	Brf1	scaf_00029	7275766	7292533	2363.03	2.06831	0.350092	5.90658	3.49e-09	8.67e-08	Brf1	TF3B	desc=Transcription factor IIIB 90 kDa subunit (Mus musculus)	GO:0000126,GO:0006352,GO:0006355,GO:0006384,GO:0008270,GO:0017025	GO:0000126
PMZ_0027922	Esrp1	scaf_00045	8846607	8862215	486.665	2.587	0.559174	4.62762	3.7e-06	3.74e-05	Esrp1	ESRP2	desc=Epithelial splicing regulatory protein 1 (Rattus norvegicus)	GO:0000166	GO:0005634
PMZ_0027924	Fnbp1	scaf_00007	1918106	1974544	394.824	2.1297	0.532405	4.00019	6.33e-05	0.000429567	Fnbp1	FBP1L	desc=Formin-binding protein 1 (Rattus norvegicus)	GO:0005515,GO:0006897	GO:0005938
PMZ_0027940	Fbxw2	scaf_00024	6084459	6167699	2395.61	1.55552	0.433518	3.58404	0.000338324	0.00179497	Fbxw2	FBXW2	desc=F-box/WD repeat-containing protein 2 (Rattus norvegicus)	GO:0005515	GO:0005737
PMZ_0028019	rbpms	scaf_00013	792722	802478	3514.86	4.31559	1.07341	4.00173	6.29e-05	0.000427082	rbpms	RBPMS	desc=RNA-binding protein with multiple splicing (Xenopus laevis)	GO:0000166,GO:0003676	GO:0005737
PMZ_0028026	fam213b	scaf_00003	15739953	15749215	2750.39	4.27376	0.883712	4.83351	1.34e-06	1.53e-05	fam213b	PGFS	desc=Prostamide/prostaglandin F synthase (Xenopus laevis)		GO:0005829
PMZ_0028060		scaf_00090	219309	228506	226.14	8.35738	0.753354	10.5131	7.52e-26	5.04e-23	DDB_G0268948	Y8948	desc=Putative methyltransferase DDB_G0268948 (Dictyostelium discoideum)	GO:0008152,GO:0008168	GO:0045335
PMZ_0028070	Dpp3	scaf_00009	16142147	16165353	1506.45	1.89772	0.395381	4.80188	1.57e-06	1.77e-05	Dpp3		desc=Dipeptidyl peptidase 3 (Rattus norvegicus)
PMZ_0028100		scaf_00018	8705905	8740874	276.897	2.89978	0.387854	7.47558	7.69e-14	6.25e-12		ADA12	Note=Similar to Zinc metalloproteinase-disintegrin-like MTP8 (Drysdalia coronoides)	GO:0004222,GO:0006508,GO:0008237,GO:0008270	GO:0016021
PMZ_0028116	Wdr77	scaf_00014	9805904	9827914	556.044	2.71868	0.487083	5.57981	2.41e-08	4.71e-07	Wdr77		desc=Methylosome protein 50 (Mus musculus)	GO:0005515
PMZ_0028198	SLC5A5	scaf_00031	10122209	10127836	309.407	4.94781	1.17562	4.16733	3.08e-05	0.00023267	SLC5A5	SC5A5	desc=Sodium/iodide cotransporter (Homo sapiens)	GO:0005215,GO:0006810,GO:0016020,GO:0055085	GO:0070062
PMZ_0028199	TRIP6	scaf_00142	376680	395391	948.724	2.32916	0.61918	3.76502	0.000166533	0.000983553	TRIP6	LPP	desc=Thyroid receptor-interacting protein 6 (Bos taurus)	GO:0008270	GO:0005737
PMZ_0028245	KLHL5	scaf_00026	10681698	10711098	2103.08	5.56774	0.467215	11.915	9.89e-33	1.75e-29	KLHL5		desc=Kelch-like protein 5 (Homo sapiens)	GO:0005515
PMZ_0028259	tdrd7	scaf_00013	751224	766521	5537.62	3.02369	0.533208	5.65999	1.51e-08	3.17e-07	tdrd7	TDRD7	desc=Tudor domain-containing protein 7 (Xenopus laevis)		GO:0005737
PMZ_0028316	Gli2	scaf_00016	9952553	10007032	1171.3	1.21623	0.397065	3.06961	0.00214335	0.00850555	Gli2	GLI2/GLI3	desc=Zinc finger protein GLI2 (Mus musculus)	GO:0003676,GO:0046872	GO:0005737
PMZ_0028325	UGP2	scaf_00036	9744948	9764833	644.247	1.73527	0.437495	3.96676	7.29e-05	0.000485991	UGP2	UGPA	desc=UTP--glucose-1-phosphate uridylyltransferase (Cricetulus griseus)	GO:0003983,GO:0006011,GO:0008152,GO:0070569	GO:0005737
PMZ_0028639	Msh6	scaf_00025	9451781	9463599	212.758	2.3544	0.707658	3.32156	0.000895167	0.00409916	Msh6	MSH6	desc=DNA mismatch repair protein Msh6 (Mus musculus)	GO:0005524,GO:0006298,GO:0030983	GO:0005794
PMZ_0028675	CAPN1	scaf_00009	11909434	11944715	359.973	3.03953	0.597423	5.09679	3.45e-07	4.74e-06	CAPN1		desc=Calpain-1 catalytic subunit (Bos taurus)	GO:0004198,GO:0005509,GO:0005622,GO:0006508,GO:0045214
PMZ_0028679	Aven	scaf_00009	12376935	12383527	445.474	1.6698	0.330448	5.05016	4.41e-07	5.85e-06	Aven		desc=Cell death regulator Aven (Mus musculus)
PMZ_0028720	Kcnk18	scaf_00041	4309459	4320981	974.305	3.15539	0.978457	3.22529	0.00125846	0.00546883	Kcnk18		desc=Potassium channel subfamily K member 18 (Rattus norvegicus)	GO:0005267,GO:0016020,GO:0071805
PMZ_0028730	LRRTM3	scaf_00041	4535323	4538638	697.379	4.72588	1.05193	4.46796	7.9e-06	7.16e-05	LRRTM3		desc=Leucine-rich repeat transmembrane neuronal protein 3 (Homo sapiens)	GO:0005515
PMZ_0028733	mapkbp1	scaf_00029	5595587	5617550	5620.12	5.69859	0.731722	7.78501	6.97e-15	6.7e-13	mapkbp1	WDR62	desc=Mitogen-activated protein kinase-binding protein 1 (Xenopus laevis)	GO:0005515	GO:0005737
PMZ_0028768	Dact1	scaf_00009	15306420	15315302	667.808	2.06378	0.652189	3.17476	0.00149961	0.00634638	Dact1		desc=Dapper homolog 1 (Mus musculus)
PMZ_0028836	RNF26	scaf_00038	10098172	10099713	114.749	2.29382	0.575393	3.98129	6.85e-05	0.000460388	RNF26	RNF26	desc=RING finger protein 26 (Homo sapiens)	GO:0005515,GO:0008270	GO:0016021
PMZ_0028840		scaf_00035	8676198	8689249	26.2874	2.27392	0.624264	3.63714	0.000275686	0.00151021
PMZ_0028843	ZP4	scaf_00014	9246333	9256106	14036.4	3.32371	1.0525	3.15859	0.00158533	0.00663544	ZP4		desc=Zona pellucida sperm-binding protein 4 (Homo sapiens)
PMZ_0028855	SDC4	scaf_00011	7510891	7514999	1623.68	4.51601	0.692953	6.5203	7.02e-11	2.85e-09	SDC4	SDC4	desc=Syndecan-4 (Sus scrofa)	GO:0016020	GO:0009986
PMZ_0028885	PRSS33	scaf_00003	5096928	5124190	1556.5	7.08542	0.763163	9.2499	2.25e-20	5.87e-18	PRSS33	OVCH1	desc=Serine protease 33 (Homo sapiens)	GO:0004252,GO:0006508	GO:0005576
PMZ_0028892	Mex3c	scaf_00006	11376023	11379091	8608.38	5.16699	0.570251	9.06455	1.25e-19	2.83e-17	Mex3c	MEX3C/MEX3B	desc=RNA-binding E3 ubiquitin-protein ligase MEX3C (Mus musculus)	GO:0003676,GO:0003723,GO:0005515,GO:0008270	GO:0000932
PMZ_0028899	Epb41l5	scaf_00005	10709852	10745835	2600.46	2.02974	0.473298	4.28444	1.83e-05	0.000148837	Epb41l5	E41L5	desc=Band 4.1-like protein 5 (Rattus norvegicus)	GO:0005737,GO:0005856,GO:0005912,GO:0008092,GO:0019898	GO:0005912
PMZ_0028900	TMEM245	scaf_00005	10770247	10780404	484.966	2.0051	0.485263	4.12738	3.67e-05	0.00027018	TMEM245	TM245	desc=Transmembrane protein 245 (Bos taurus)		GO:0016021
PMZ_0028912	Telo2	scaf_00008	5117446	5121294	805.248	2.05611	0.576993	3.56128	0.000369058	0.00193282	Telo2	TELO2	desc=Telomere length regulation protein TEL2 homolog (Mus musculus)		GO:0000781
PMZ_0028919	BETA	scaf_00035	3329875	3337924	872.834	2.8536	0.676749	4.20865	2.57e-05	0.000199528	BETA		desc=Tubulin beta-1 chain (Physarum polycephalum)	GO:0003924,GO:0005200,GO:0005525,GO:0005874,GO:0007017
PMZ_0028931	il17rd	scaf_00027	5558590	5578783	1093.47	2.296	0.576023	3.97825	6.94e-05	0.000465508	il17rd		desc=Interleukin-17 receptor D (Danio rerio)	GO:0005515,GO:0007165
PMZ_0028941	Barx1	scaf_00003	14133707	14148338	228.175	3.99994	0.539625	7.41086	1.25e-13	9.83e-12	Barx1	BARX1	desc=Homeobox protein BarH-like 1 (Mus musculus)	GO:0003677,GO:0006355,GO:0043565	GO:0005634
PMZ_0028950	SLC25A44	scaf_00013	14115771	14119871	425.979	2.60909	0.622885	4.19241	2.76e-05	0.000212422	SLC25A44	S2544	desc=Solute carrier family 25 member 44 (Homo sapiens)		GO:0016021
PMZ_0028952		scaf_00042	4692420	4698597	297.841	3.02948	0.753212	4.02928	5.59e-05	0.000386756
PMZ_0028960		scaf_00042	4558286	4575220	660.202	1.71331	0.333374	5.14155	2.72e-07	3.91e-06		NOL9			GO:0016020
PMZ_0028977	RACGAP1	scaf_00016	7019456	7035124	645.227	3.114	0.599013	5.19661	2.03e-07	3.03e-06	RACGAP1	RGAP1	desc=Rac GTPase-activating protein 1 (Homo sapiens)	GO:0007165,GO:0035556	GO:0001669
PMZ_0029018	lppr5	scaf_00023	412181	426042	306.03	4.06572	0.81349	4.99799	5.79e-07	7.32e-06	lppr5	PLPR5	desc=Lipid phosphate phosphatase-related protein type 5 (Xenopus laevis)	GO:0003824,GO:0016020
PMZ_0029030	paqr5b	scaf_00006	16865087	16876224	226.876	2.83863	0.90649	3.13213	0.00173541	0.00715417	paqr5b	MPRGB	desc=Membrane progestin receptor gamma-B (Danio rerio)	GO:0016021	GO:0016021
PMZ_0029036	Smpd3	scaf_00008	9439920	9461910	39.304	2.95447	0.964372	3.05245	0.00226984	0.00891281	Smpd3	NSMA2	desc=Sphingomyelin phosphodiesterase 3 (Mus musculus)		GO:0005794
PMZ_0029066	ZP4	scaf_00015	9759229	9785274	17750.7	4.38966	1.04909	4.16755	3.08e-05	0.000232538	ZP4	ZP4	desc=Zona pellucida sperm-binding protein 4 (Homo sapiens)		GO:0005794
PMZ_0029067	ZP2	scaf_00015	9744615	9757094	6753.65	6.43503	0.88829	7.22608	4.97e-13	3.45e-11	ZP2	ZP2	desc=Zona pellucida sperm-binding protein 2 (Felis catus)		GO:0005783
PMZ_0029099	ING1	scaf_00026	5947651	5965057	712.158	1.40528	0.4528	3.10206	0.00192177	0.0077788	ING1		desc=Inhibitor of growth protein 1 (Homo sapiens)	GO:0005515,GO:0005634,GO:0008270,GO:0008285,GO:0010941,GO:0016568
PMZ_0029107	ZDHHC6	scaf_00044	4043222	4053496	771.384	2.83287	0.729163	3.89166	9.96e-05	0.000635539	ZDHHC6		desc=Palmitoyltransferase ZDHHC6 (Bos taurus)	GO:0008270
PMZ_0029114	KIAA0753	scaf_00038	2209058	2219762	1479.8	2.05775	0.556471	3.6887	0.000225403	0.00127281	KIAA0753	MOONR	desc=Uncharacterized protein KIAA0753 (Homo sapiens)
PMZ_0029115	noc4l	scaf_00038	2131271	2141374	2521.69	1.8327	0.516463	3.55192	0.000382427	0.00199187	noc4l	NOC4B/NOC4L	desc=Nucleolar complex protein 4 homolog A (Xenopus laevis)	GO:0005488,GO:0042254	GO:0016021
PMZ_0029120	ZNF135	scaf_00037	1656458	1662415	618.368	2.72884	0.420189	6.49516	8.29e-11	3.28e-09	ZNF135	ZSC20/Z354A	desc=Zinc finger protein 135 (Homo sapiens)	GO:0003676,GO:0046872	GO:0005634
PMZ_0029132	GBX2	scaf_00035	6009892	6039175	837.743	2.97785	0.9826	3.03189	0.00243026	0.00942082	GBX2		desc=Homeobox protein GBX-2 (Gallus gallus)	GO:0003677,GO:0006355,GO:0043565
PMZ_0029177	FBXO32	scaf_00002	4563248	4591640	666.756	2.53436	0.458377	5.52794	3.24e-08	6.16e-07	FBXO32	FBX32	desc=F-box only protein 32 (Bos taurus)	GO:0005515	GO:0005730
PMZ_0029184	TFAP4	scaf_00011	9192733	9205477	300.895	2.36111	0.634885	3.71498	0.000203218	0.00116549	TFAP4	TFAP4	desc=Transcription factor AP-4 (Homo sapiens)		GO:0005634
PMZ_0029206	FBXL7	scaf_00099	734202	736226	67.8609	2.74746	0.873031	3.14867	0.00164014	0.00682076	FBXL7	FBXL7	desc=F-box/LRR-repeat protein 7 (Homo sapiens)	GO:0005515	GO:0005813
PMZ_0029222	SCN3B	scaf_00030	2134682	2145025	63.806	2.36574	0.739357	3.20535	0.00134898	0.00580118	SCN3B		desc=Sodium channel subunit beta-3 (Bos taurus)	GO:0001518,GO:0005515,GO:0006814,GO:0017080
PMZ_0029228	FMNL3	scaf_00016	15304311	15346845	364.229	3.0955	0.836959	3.69774	0.000217529	0.00123553	FMNL3	FMNL3	desc=Formin-like protein 3 (Homo sapiens)	GO:0003779,GO:0005488,GO:0007010,GO:0008360,GO:0016043	GO:0005737
PMZ_0029231	Mylk	scaf_00016	15371448	15387158	96.8464	3.18212	0.61301	5.19134	2.09e-07	3.09e-06	Mylk	MYLK	desc=Myosin light chain kinase%2C smooth muscle (Mus musculus)	GO:0005515	GO:0005829
PMZ_0029246	ASB13	scaf_00022	4740883	4747450	162.392	2.06736	0.57317	3.6109	0.000305139	0.00164374	ASB13		desc=Ankyrin repeat and SOCS box protein 13 (Homo sapiens)	GO:0005515,GO:0035556
PMZ_0029256	pacsin2	scaf_00014	16121867	16134243	371.5	2.18517	0.628882	3.48017	0.000501101	0.00250551	pacsin2		desc=Protein kinase C and casein kinase substrate in neurons protein 2 (Xenopus laevis)
PMZ_0029264	fumD	scaf_00014	15914381	15917341	131.582	3.79914	0.815223	4.64621	3.38e-06	3.47e-05	fumD		desc=Fumonisin B1 esterase (Sphingopyxis macrogoltabida)
PMZ_0029280	Tbc1d31	scaf_00033	1070273	1075975	744.177	2.3409	0.514467	4.53941	5.64e-06	5.36e-05	Tbc1d31	TBC31	desc=TBC1 domain family member 31 (Mus musculus)	GO:0005515	GO:0005813
PMZ_0029292	FBXL14	scaf_00027	8204833	8213192	356.617	2.83383	0.665276	4.26791	1.97e-05	0.000158448	FBXL14		desc=F-box/LRR-repeat protein 14 (Bos taurus)	GO:0005515
PMZ_0029303	CTNNB1	scaf_00028	1441604	1461739	8605.02	3.45465	0.642847	5.37448	7.68e-08	1.31e-06	CTNNB1	CTNB1	desc=Catenin beta-1 (Bos taurus)	GO:0004871,GO:0005488,GO:0005515,GO:0034333
PMZ_0029334	rtel1	scaf_00056	3778227	3853485	989.461	1.49218	0.388885	3.83693	0.000124582	0.000769284	rtel1		desc=Regulator of telomere elongation helicase 1 (Danio rerio)	GO:0003676,GO:0005524,GO:0006139,GO:0008026,GO:0016818
PMZ_0029345		scaf_00017	12169760	12175401	174.971	3.04299	0.686073	4.42654	9.58e-06	8.46e-05
PMZ_0029352	CCDC134	scaf_00011	2554721	2564096	861.166	2.76739	0.524152	5.29311	1.2e-07	1.93e-06	CCDC134	CC134	desc=Coiled-coil domain-containing protein 134 (Homo sapiens)		GO:0005576
PMZ_0029381	EXD2	scaf_00036	4622244	4636932	5952.03	5.42086	0.4059	13.3597	1.04e-40	6.74e-37	EXD2	EXD2	desc=Exonuclease 3'-5' domain-containing protein 2 (Homo sapiens)	GO:0003676,GO:0006139,GO:0008408	GO:0008408
PMZ_0029397	pi4kb	scaf_00013	1097758	1103893	190.64	3.27675	0.558143	5.86695	4.44e-09	1.07e-07	pi4kb	PI4KB	desc=Phosphatidylinositol 4-kinase beta (Xenopus tropicalis)	GO:0004430,GO:0006661,GO:0046854,GO:0048015	GO:0005741
PMZ_0029398	Unc13b	scaf_00013	1445792	1489735	76.9224	1.68293	0.51014	3.29663	0.000978531	0.0044287	Unc13b	UN13B	desc=Protein unc-13 homolog B (Mus musculus)	GO:0005515,GO:0007268,GO:0019992	GO:0030054
PMZ_0029404	UBE2N	scaf_00010	4373661	4381764	727.554	1.14625	0.373554	3.07028	0.00213858	0.00849008	UBE2N	UBE2N	desc=Ubiquitin-conjugating enzyme E2 N (Bos taurus)		GO:0070062
PMZ_0029406	St5	scaf_00014	11725543	11735168	301.689	2.67426	0.755123	3.54571	0.00039155	0.00203094	St5		desc=Suppression of tumorigenicity 5 protein (Mus musculus)
PMZ_0029414	ZP4	scaf_00014	12054635	12079481	12716.6	4.15594	0.717491	5.79785	6.72e-09	1.54e-07	ZP4		desc=Zona pellucida sperm-binding protein 4 (Bos taurus)
PMZ_0029430	Gpm6b	scaf_00009	227324	237363	2499.64	3.24167	0.584098	5.54772	2.89e-08	5.56e-07	Gpm6b		desc=Neuronal membrane glycoprotein M6-b (Mus musculus)	GO:0016021
PMZ_0029459	mybX	scaf_00002	1668102	1688633	139.123	3.51036	0.994009	3.52396	0.000425155	0.0021739	mybX	PVA	desc=Myb-like protein X (Dictyostelium discoideum)	GO:0016020
PMZ_0029462	SOX12	scaf_00002	1396557	1400681	309.943	3.0168	0.450151	6.69937	2.09e-11	9.59e-10	SOX12	SX11B/SOX12	desc=Transcription factor SOX-12 (Homo sapiens)		GO:0005634
PMZ_0029464	ESRP2	scaf_00020	13836136	13861937	1977.96	2.51383	0.514209	4.90323	9.43e-07	1.12e-05	ESRP2	ESRP1	desc=Epithelial splicing regulatory protein 2 (Gallus gallus)	GO:0000166,GO:0003676	GO:0005634
PMZ_0029499		scaf_00020	10640318	10648017	219.847	5.5926	0.72428	7.6912	1.46e-14	1.34e-12
PMZ_0029511	DEGS1	scaf_00041	4874392	4876764	1784.19	2.39914	0.54784	4.37702	1.2e-05	0.000102952	DEGS1		desc=Sphingolipid delta(4)-desaturase DES1 (Homo sapiens)	GO:0006629
PMZ_0029516	RHEB	scaf_00016	6226183	6235591	119.801	3.1129	0.62814	4.95002	7.42e-07	9.08e-06	RHEB	RHEB	desc=GTP-binding protein Rheb (Bos taurus)	GO:0005525,GO:0007165,GO:0007264,GO:0016020	GO:0030425
PMZ_0029520	CDK5R1	scaf_00016	6361154	6367378	97.6529	5.3331	0.589875	8.94481	3.73e-19	7.78e-17	CDK5R1	CD5R1	desc=Cyclin-dependent kinase 5 activator 1 (Bos taurus)	GO:0016533,GO:0016534	GO:0030424
PMZ_0029540	lmo3	scaf_00014	5079133	5099434	240.939	4.04263	0.720511	5.60933	2.03e-08	4.05e-07	lmo3		desc=LIM domain only protein 3 (Xenopus laevis)	GO:0008270
PMZ_0029569	sh3yl1	scaf_00001	11310349	11358722	201.011	2.19313	0.534965	4.10485	4.05e-05	0.000294118	sh3yl1	SH3Y1	desc=SH3 domain-containing YSC84-like protein 1 (Xenopus laevis)	GO:0005515
PMZ_0029570	Myo10	scaf_00028	12069836	12110700	317.105	3.91279	0.670435	5.84148	5.17e-09	1.23e-07	Myo10	MYO10	desc=Unconventional myosin-X (Rattus norvegicus)	GO:0005515,GO:0005856	GO:0005938
PMZ_0029595	SMCR8	scaf_00011	3109578	3120977	1068.85	1.68897	0.486545	3.46755	0.000525234	0.0026069	SMCR8	SMCR8	desc=Smith-Magenis syndrome chromosomal region candidate gene 8 protein (Homo sapiens)		GO:0005634
PMZ_0029597	MAD1L1	scaf_00011	3204510	3237505	2199.46	1.91632	0.474228	4.03982	5.35e-05	0.000372705	MAD1L1	MD1L1	desc=Mitotic spindle assembly checkpoint protein MAD1 (Homo sapiens)	GO:0007094	GO:0015629
PMZ_0029641	Clasp1	scaf_00005	11287499	11306203	170.358	1.68094	0.533675	3.14826	0.00164245	0.00682888	Clasp1	CLAP1	desc=CLIP-associating protein 1 (Mus musculus)	GO:0005488,GO:0005828,GO:0005881,GO:0043515,GO:0051010	GO:0000777
PMZ_0029647	Vash1	scaf_00029	7037048	7061367	351.594	3.08277	0.667348	4.6166	3.9e-06	3.91e-05	Vash1	VASH1	desc=Vasohibin-1 (Mus musculus)	GO:0005737,GO:0045765	GO:0045177
PMZ_0029657		scaf_00021	3189288	3209444	82.1302	2.9256	0.834439	3.50762	0.000452139	0.00229495	FIP1	FIP1			GO:0005847
PMZ_0029714	CLCN3	scaf_00003	17996433	18017644	578.397	3.74365	0.811728	4.60695	4.09e-06	4.07e-05	CLCN3	CLCN3	desc=H(+)/Cl(-) exchange transporter 3 (Pongo abelii)	GO:0005216,GO:0005247,GO:0006821,GO:0016020,GO:0055085	GO:0005769
PMZ_0029716	Fam84a	scaf_00136	420656	421627	813.569	2.07233	0.555362	3.73419	0.000188317	0.00109163	Fam84a	FA84B	desc=Protein FAM84A (Mus musculus)		GO:0005737
PMZ_0029721	Dtx2	scaf_00038	7756998	7760931	298.527	2.11967	0.661475	3.19703	0.00138849	0.00594476	Dtx2	DTX1	desc=Probable E3 ubiquitin-protein ligase DTX2 (Mus musculus)		GO:0005737
PMZ_0029729	trmt10a	scaf_00044	7431678	7436882	109.13	3.20149	0.587745	5.44061	5.31e-08	9.48e-07	trmt10a		desc=tRNA methyltransferase 10 homolog A (Xenopus tropicalis)
PMZ_0029733	ADAR	scaf_00060	3354621	3404275	696.46	1.31275	0.429962	3.05161	0.00227616	0.00893151	ADAR	DSRAD	desc=Double-stranded RNA-specific adenosine deaminase (Homo sapiens)	GO:0003723,GO:0004000,GO:0006396	GO:0005737
PMZ_0029736	ncl1	scaf_00060	3448041	3464139	992.072	1.91067	0.44347	4.3068	1.66e-05	0.00013662	ncl1	NCLN	desc=Nicalin-1 (Danio rerio)		GO:0005789
PMZ_0029737	Trim36	scaf_00060	3496599	3525958	331.27	2.19858	0.457998	4.79934	1.59e-06	1.79e-05	Trim36	TRI36	desc=E3 ubiquitin-protein ligase Trim36 (Mus musculus)	GO:0004842,GO:0005515,GO:0005622,GO:0008270,GO:0051726	GO:0001669
PMZ_0029757	SCN2A	scaf_00109	388651	398314	226.203	2.20609	0.52858	4.172	3.02e-05	0.000229109	SCN2A		desc=Sodium channel protein type 2 subunit alpha (Homo sapiens)	GO:0001518,GO:0005216,GO:0005248,GO:0005515,GO:0006811,GO:0006814,GO:0016020,GO:0019233,GO:0055085
PMZ_0029761		scaf_00048	7926438	7926938	127.593	2.96326	0.735913	4.01987	5.82e-05	0.000399194
PMZ_0029799		scaf_00006	999591	1002160	110.754	2.05042	0.421975	4.85559	1.2e-06	1.39e-05
PMZ_0029800		scaf_00006	983945	995471	1876.25	2.47326	0.415837	5.94833	2.71e-09	6.91e-08
PMZ_0029820	Fam45a	scaf_00015	5789783	5796666	1909.59	2.29738	0.384556	5.97281	2.33e-09	6.12e-08	Fam45a	FA45A	desc=Protein FAM45A (Mus musculus)
PMZ_0029823	rasef	scaf_00013	10038565	10046014	26.7256	4.6073	0.876639	5.1524	2.57e-07	3.71e-06	rasef	RASEF	desc=Ras and EF-hand domain-containing protein (Danio rerio)	GO:0005509	GO:0048471
PMZ_0029855	GABRA1	scaf_00003	9708907	9722944	70.8351	4.61665	0.854223	5.35855	8.39e-08	1.42e-06	GABRA1	GBRA5/GBRA1	desc=Gamma-aminobutyric acid receptor subunit alpha-1 (Pongo abelii)	GO:0004890,GO:0005216,GO:0006811,GO:0016020,GO:0016021	GO:0030054
PMZ_0029857	Mmd2	scaf_00019	10752023	10758462	7.8552	5.20222	1.34223	3.80378	0.000142504	0.000861962	Mmd2	PAQRA	desc=Monocyte to macrophage differentiation factor 2 (Mus musculus)	GO:0016021	GO:0000139
PMZ_0029900	Wdfy2	scaf_00077	1992518	2019046	620.695	2.27589	0.500597	4.54597	5.47e-06	5.22e-05	Wdfy2	WDFY2	desc=WD repeat and FYVE domain-containing protein 2 (Mus musculus)	GO:0005515,GO:0046872	GO:0046872
PMZ_0029968		scaf_00018	5327770	5344505	119.541	4.11755	0.803757	5.11259	3.18e-07	4.42e-06
PMZ_0030009	Tlk2	scaf_00016	9555481	9575761	3124.85	2.23231	0.503522	4.43243	9.32e-06	8.26e-05	Tlk2	TLK1	desc=Serine/threonine-protein kinase tousled-like 2 (Mus musculus)	GO:0004672,GO:0004674,GO:0005524,GO:0005634,GO:0006468,GO:0016772	GO:0005634
PMZ_0030048	Rtl1	scaf_00034	10606240	10633097	1645.52	1.32783	0.425586	3.11888	0.00181543	0.00742102	Rtl1	AKAP8	desc=Retrotransposon-like protein 1 (Mus musculus)	GO:0003677,GO:0005634	GO:0000793
PMZ_0030049	gle1	scaf_00034	10674490	10686810	328.062	3.61644	0.413354	8.74374	2.26e-18	3.98e-16	gle1	GLE1	desc=Nucleoporin GLE1 (Danio rerio)		GO:0005737
PMZ_0030083	Mettl20	scaf_00165	313627	316005	72.6666	3.26252	0.717222	4.54594	5.47e-06	5.22e-05	Mettl20	MET20	desc=Protein N-lysine methyltransferase METTL20 (Mus musculus)		GO:0005737
PMZ_0030092	Mark1	scaf_00025	6814354	6833530	1663.52	2.66624	0.43447	6.13777	8.37e-10	2.47e-08	Mark1	MARK3	desc=Serine/threonine-protein kinase MARK1 (Mus musculus)	GO:0004672,GO:0005524,GO:0006468,GO:0016772	GO:0005886
PMZ_0030105	CALHM2	scaf_00038	9264240	9280531	267.748	5.57637	0.907861	6.10688	1.02e-09	2.93e-08	CALHM2	CAHM2	desc=Calcium homeostasis modulator protein 2 (Homo sapiens)		GO:0016021
PMZ_0030127	GNAT1	scaf_00010	7370839	7374395	117.129	3.06799	0.677982	4.52653	6e-06	5.66e-05	GNAT1	GT1	desc=Guanine nucleotide-binding protein G(t) subunit alpha-1 (Canis familiaris)	GO:0003924,GO:0004871,GO:0005525,GO:0007186,GO:0007188,GO:0019001,GO:0031683
PMZ_0030142	RAB27A	scaf_00031	8707294	8714291	318.912	3.94192	0.618196	6.36877	1.91e-10	6.72e-09	RAB27A	RB27A	desc=Ras-related protein Rab-27A (Sus scrofa)	GO:0003924,GO:0005525,GO:0005622,GO:0006886,GO:0006913,GO:0007165,GO:0007264,GO:0015031,GO:0016020	GO:0016324
PMZ_0030144	WFDC3	scaf_00031	8688273	8694757	33650.3	5.5703	1.37505	3.92132	8.81e-05	0.000573031	WFDC3	WFDC3	desc=WAP four-disulfide core domain protein 3 (Homo sapiens)	GO:0005576,GO:0030414	GO:0005576
PMZ_0030149	Irx3	scaf_00008	6731925	6758637	240.079	3.13397	0.613964	5.11129	3.2e-07	4.45e-06	Irx3	IRX3	desc=Iroquois-class homeodomain protein IRX-3 (Mus musculus)	GO:0003677,GO:0006355,GO:0043565	GO:0005737
PMZ_0030153	CDS2	scaf_00044	1867167	1888482	456.301	2.79932	0.707247	3.97418	7.06e-05	0.000472892	CDS2		desc=Phosphatidate cytidylyltransferase 2 (Bos taurus)
PMZ_0030173	TCF7L2	scaf_00131	9855	17208	100.902	1.79275	0.535642	3.34667	0.000817873	0.00380289	TCF7L2	TF7L2	desc=Transcription factor 7-like 2 (Homo sapiens)	GO:0005634,GO:0006357,GO:0008013,GO:0016055,GO:0060070,GO:2001237	GO:0071664
PMZ_0030181		scaf_00021	7394197	7400822	328.736	4.44588	0.805875	5.5124	3.54e-08	6.66e-07
PMZ_0030183		scaf_00021	7437541	7447771	1015.45	3.77622	0.671571	5.63356	1.77e-08	3.61e-07				GO:0003725,GO:0016021
PMZ_0030184	C21orf33	scaf_00021	7451533	7452880	1673.15	2.67839	0.777409	3.46894	0.000522516	0.00259521	C21orf33	ES1	desc=ES1 protein homolog%2C mitochondrial (Homo sapiens)		GO:0005739
PMZ_0030186	Cln5	scaf_00021	7490428	7523878	2252.57	2.57979	0.475184	5.4358	5.46e-08	9.7e-07	Cln5	CLN5	desc=Ceroid-lipofuscinosis neuronal protein 5 homolog (Mus musculus)	GO:0003725,GO:0005764,GO:0016021,GO:0022008	GO:0005783
PMZ_0030190	HEXDC	scaf_00019	3915985	3934790	833.748	2.4591	0.421454	5.83494	5.38e-09	1.27e-07	HEXDC	HEXDC	desc=Hexosaminidase D (Bos taurus)	GO:0004553,GO:0005975	GO:0005737
PMZ_0030199	LAMP1	scaf_00120	416092	428611	1653.37	4.08727	0.948059	4.30429	1.68e-05	0.000137947	LAMP1		desc=Lysosome-associated membrane glycoprotein 1 (Homo sapiens)	GO:0016020
PMZ_0030237	GALNT12	scaf_00005	16508385	16521097	1009.5	2.96199	0.916737	3.2328	0.00122584	0.00535341	GALNT12	GLT12	desc=Polypeptide N-acetylgalactosaminyltransferase 12 (Homo sapiens)		GO:0000139
PMZ_0030257	NIPA2	scaf_00003	9983562	9991296	165.063	2.12507	0.67547	3.14744	0.00164706	0.00684374	NIPA2	NIPA2	desc=Magnesium transporter NIPA2 (Bos taurus)	GO:0015095,GO:0015693,GO:0016021	GO:0005769
PMZ_0030258	TMEM33	scaf_00003	10014302	10022304	923.101	2.5549	0.543043	4.70294	2.56e-06	2.71e-05	TMEM33	TMM33	desc=Transmembrane protein 33 (Homo sapiens)	GO:0016021	GO:0070062
PMZ_0030276	SNX14	scaf_00050	4211467	4225026	327.256	2.18545	0.530802	4.1148	3.88e-05	0.000283409	SNX14	SNX14	desc=Sorting nexin-14 (Pongo abelii)	GO:0038032	GO:0016021
PMZ_0030278	SCAF4	scaf_00050	4061432	4076910	1763.97	1.4107	0.380544	3.7048	0.000211558	0.00120549	SCAF4	SCAF8	desc=Splicing factor%2C arginine/serine-rich 15 (Homo sapiens)	GO:0000166	GO:0016363
PMZ_0030322	CYP26A1	scaf_00018	7791718	7799648	158.538	5.26114	0.992256	5.25522	1.48e-07	2.31e-06	CYP26A1	CP26A	desc=Cytochrome P450 26A1 (Gallus gallus)	GO:0005506,GO:0016705,GO:0020037,GO:0055114	GO:0005789
PMZ_0030328	Prrt1	scaf_00024	11889460	11895838	212.211	3.38124	0.701183	4.80705	1.53e-06	1.73e-05	Prrt1	PRRT1	desc=Proline-rich transmembrane protein 1 (Mus musculus)	GO:0009607,GO:0016021	GO:0030054
PMZ_0030338	TXNDC11	scaf_00019	2673160	2718015	1538.83	3.3218	0.371471	8.94272	3.8e-19	7.85e-17	TXNDC11	TXD11	desc=Thioredoxin domain-containing protein 11 (Homo sapiens)		GO:0005783
PMZ_0030370	CACNG2	scaf_00003	19692651	19717476	495.918	2.89877	0.61204	4.735	2.19e-06	2.37e-05	CACNG2		desc=Voltage-dependent calcium channel gamma-2 subunit (Homo sapiens)	GO:0016021
PMZ_0030400	Akap6	scaf_00029	4805560	4834790	161.052	4.52019	0.818159	5.50701	3.65e-08	6.85e-07	Akap6	AKAP6	desc=A-kinase anchor protein 6 (Rattus norvegicus)		GO:0005901
PMZ_0030435	Dph3	scaf_00001	19775586	19782739	184.824	2.70838	0.591792	4.5747	4.77e-06	4.63e-05	Dph3	DPH3	desc=DPH3 homolog (Mus musculus)	GO:0009055,GO:0015035,GO:0045454	GO:0005737
PMZ_0030446	Srgap1	scaf_00010	12814549	12828366	20.5742	2.53566	0.675466	3.73742	0.000185922	0.00108033	Srgap1	SRGP1	desc=SLIT-ROBO Rho GTPase-activating protein 1 (Mus musculus)		GO:0005622
PMZ_0030471		scaf_00019	5122559	5134968	429.9	3.8003	0.615397	6.18198	6.33e-10	1.96e-08
PMZ_0030473	PFKM	scaf_00016	12445589	12497891	1903.69	1.79911	0.460917	3.91485	9.05e-05	0.000586329	PFKM	PFKAM	desc=ATP-dependent 6-phosphofructokinase%2C muscle type (Canis familiaris)	GO:0003872,GO:0006002,GO:0006096	GO:0005737
PMZ_0030484	TNRC18	scaf_00037	6352995	6388930	2067.05	3.51676	0.519774	6.76718	1.31e-11	6.38e-10	TNRC18	TNC18	desc=Trinucleotide repeat-containing gene 18 protein (Homo sapiens)		GO:0003682
PMZ_0030490	gar2	scaf_00052	1710773	1716471	76.0293	5.14459	1.1617	4.33754	1.44e-05	0.000120537	gar2		desc=Protein gar2 (Schizosaccharomyces pombe (strain 972 / ATCC 24843))
PMZ_0030504	lamtor2	scaf_00006	19353440	19355509	979.061	2.45202	0.491388	4.99313	5.94e-07	7.47e-06	lamtor2	LTOR2	desc=Ragulator complex protein LAMTOR2 (Danio rerio)		GO:0005770
PMZ_0030505	Rab11b	scaf_00006	19294526	19311321	2206.11	1.55546	0.501362	3.10581	0.00189757	0.00769687	Rab11b	RB11B	desc=Ras-related protein Rab-11B (Mus musculus)	GO:0003924,GO:0005525,GO:0005622,GO:0006886,GO:0006913,GO:0007165,GO:0007264,GO:0015031,GO:0016020	GO:0030054
PMZ_0030522	UBIAD1	scaf_00003	3520423	3521629	133.069	5.54169	1.08165	5.05982	4.2e-07	5.59e-06	UBIAD1	UBIA1	desc=UbiA prenyltransferase domain-containing protein 1 (Ailuropoda melanoleuca)	GO:0004659,GO:0016021	GO:0005783
PMZ_0030524	PPP1R12A	scaf_00003	3595788	3596998	127.143	2.10448	0.677124	3.10229	0.00192032	0.00777596	PPP1R12A	MYPT1	desc=Protein phosphatase 1 regulatory subunit 12A (Gallus gallus)
PMZ_0030538	SLC12A2	scaf_00031	4759028	4871166	828.87	2.40278	0.655383	3.66475	0.00024758	0.00137879	SLC12A2	S12A1/S12A2	desc=Solute carrier family 12 member 2 (Homo sapiens)	GO:0005215,GO:0006810,GO:0006811,GO:0016020,GO:0055085	GO:0016021
PMZ_0030541	ZP2	scaf_00031	4547153	4555398	798.768	4.46091	0.857348	5.20441	1.95e-07	2.92e-06	ZP2	ZP2	desc=Zona pellucida sperm-binding protein 2 (Bos taurus)		GO:0005783
PMZ_0030564	SLC2A11	scaf_00050	128701	171535	197.265	1.92792	0.59881	3.22094	0.00127771	0.00554255	SLC2A11	GTR11	desc=Solute carrier family 2%2C facilitated glucose transporter member 11 (Homo sapiens)	GO:0005215,GO:0016021,GO:0022857,GO:0055085	GO:0016021
PMZ_0030572	PHC3	scaf_00184	119474	122206	87.0674	2.13195	0.67183	3.17139	0.00151713	0.00640381	PHC3		desc=Polyhomeotic-like protein 3 (Homo sapiens)	GO:0005515
PMZ_0030573	Obfc1	scaf_00016	15688772	15692122	429.98	2.28927	0.578259	3.95532	7.64e-05	0.000506898	Obfc1	STN1	desc=CST complex subunit STN1 (Rattus norvegicus)		GO:0000784
PMZ_0030598		scaf_00046	8552788	8607619	90.2289	3.38424	1.04635	3.22205	0.00127278	0.00552487			Note=Protein of unknown function	GO:0005319,GO:0006869
PMZ_0030614	KIAA1644	scaf_00014	14822885	14840128	21.5896	3.09566	0.997481	3.08023	0.0020684	0.00824345	KIAA1644		desc=Uncharacterized protein KIAA1644 (Homo sapiens)
PMZ_0030627	ALG1	scaf_00037	5213182	5225740	740.101	3.78339	0.468142	8.08138	6.4e-16	7.71e-14	ALG1	ALG1	desc=Chitobiosyldiphosphodolichol beta-mannosyltransferase (Homo sapiens)	GO:0016757	GO:0005789
PMZ_0030642	PRDM12	scaf_00107	835087	853757	15.4008	2.33014	0.762656	3.04209	0.00234942	0.009166	PRDM12		desc=PR domain zinc finger protein 12 (Homo sapiens)	GO:0003676,GO:0046872
PMZ_0030659	IPO7	scaf_00014	10663565	10687541	9818.57	1.71035	0.441733	3.87421	0.000106973	0.000675977	IPO7		desc=Importin-7 (Homo sapiens)	GO:0003676,GO:0005488,GO:0006886,GO:0008536,GO:0046872
PMZ_0030669	RBM25	scaf_00047	7081016	7140590	5189.69	1.02422	0.338051	3.02954	0.00244929	0.00948137	RBM25		desc=RNA-binding protein 25 (Homo sapiens)	GO:0000166,GO:0003824,GO:0004553,GO:0005975,GO:0030246
PMZ_0030700	DLGAP1	scaf_00003	7449573	7477290	70.2114	3.53874	0.876873	4.02234	5.76e-05	0.000396087	DLGAP1	DLGP1	desc=Disks large-associated protein 1 (Homo sapiens)	GO:0007270	GO:0030054
PMZ_0030709	TTK	scaf_00033	9199010	9201984	286.11	2.30285	0.623702	3.68884	0.000225276	0.00127246	TTK	TTK	desc=Dual specificity protein kinase TTK (Macaca fascicularis)	GO:0004672,GO:0004712,GO:0005524,GO:0006468,GO:0007093,GO:0016772,GO:0051304	GO:0016020
PMZ_0030715	gnb1	scaf_00007	3926383	3946759	76.6139	3.87365	0.744434	5.19066	2.1e-07	3.1e-06	gnb1	GBB1	desc=Guanine nucleotide-binding protein G(I)/G(S)/G(T) subunit beta-1 (Xenopus laevis)	GO:0005515	GO:0004871
PMZ_0030749		scaf_00043	5725312	5759062	935.026	1.22662	0.29959	4.09404	4.24e-05	0.000306314
PMZ_0030825	Awh	scaf_00024	13099563	13113354	503.338	2.96573	0.738567	4.03243	5.52e-05	0.000382697	Awh	LHX8	desc=LIM/homeobox protein Awh (Drosophila melanogaster)	GO:0003677,GO:0006355,GO:0008270,GO:0043565	GO:0001674
PMZ_0030851		scaf_00069	61939	107923	728.922	1.56235	0.39951	3.91002	9.23e-05	0.000595774		KLDC3			GO:0005737
PMZ_0030852	ZNF839	scaf_00069	138616	151860	409.594	1.51227	0.496435	3.04369	0.00233694	0.00912829	ZNF839	ZN839	desc=Zinc finger protein 839 (Homo sapiens)	GO:0046872	GO:0046872
PMZ_0030873	Mkl1	scaf_00011	14720527	14731065	545.384	1.83348	0.452143	4.05804	4.95e-05	0.000349429	Mkl1	MKL1/MKL2	desc=MKL/myocardin-like protein 1 (Mus musculus)		GO:0005737
PMZ_0030888	TSPAN12	scaf_00010	16172334	16193797	431.154	1.93273	0.549236	3.5288	0.000417448	0.00214125	TSPAN12	TSN12	desc=Tetraspanin-12 (Bos taurus)	GO:0016021	GO:0005887
PMZ_0030890	Sars	scaf_00012	12345912	12356495	1131.72	1.49037	0.420478	3.54244	0.00039645	0.00205142	Sars	SYSC	desc=Serine--tRNA ligase%2C cytoplasmic (Mus musculus)	GO:0000166,GO:0004812,GO:0004828,GO:0005524,GO:0005737,GO:0006418,GO:0006434	GO:0005739
PMZ_0030904	Slc6a11	scaf_00153	174689	244672	569.954	1.36084	0.43311	3.14143	0.00168126	0.00696341	Slc6a11	S6A11	desc=Sodium- and chloride-dependent GABA transporter 3 (Mus musculus)	GO:0005328,GO:0006836,GO:0016021	GO:0042995
PMZ_0030933	TRMT6	scaf_00047	2063058	2076588	1368.62	1.85292	0.372684	4.97353	6.57e-07	8.18e-06	TRMT6		desc=tRNA (adenine(58)-N(1))-methyltransferase non-catalytic subunit TRM6 (Bos taurus)	GO:0030488,GO:0031515
PMZ_0030950	RAB8B	scaf_00108	222373	233891	286.51	3.03177	0.641658	4.72065	2.35e-06	2.51e-05	RAB8B	RAB8B	desc=Ras-related protein Rab-8B (Homo sapiens)	GO:0005525,GO:0007165,GO:0007264,GO:0015031,GO:0016020	GO:0051286
PMZ_0030955	TAL1	scaf_00023	7444445	7453300	255.443	3.75431	1.01056	3.70815	0.000208781	0.00119246	TAL1	TAL1	desc=T-cell acute lymphocytic leukemia protein 1 (Homo sapiens)	GO:0046983	GO:0000118
PMZ_0030966	Ap2a2	scaf_00055	1671407	1692476	286.951	1.99585	0.553521	3.60432	0.000312966	0.00167706	Ap2a2	AP2A2	desc=AP-2 complex subunit alpha-2 (Mus musculus)	GO:0005488,GO:0006886,GO:0016192,GO:0030117	GO:0030122
PMZ_0030974	Mogs	scaf_00054	3655195	3665588	511.794	2.56915	0.843081	3.04897	0.00229626	0.0089929	Mogs		desc=Mannosyl-oligosaccharide glucosidase (Rattus norvegicus)	GO:0003824,GO:0004573,GO:0009311
PMZ_0030979	TDRD15	scaf_00001	9269643	9274314	954.789	2.078	0.619871	3.34358	0.00082705	0.00383882	TDRD15	TDRD6	desc=Tudor domain-containing protein 15 (Homo sapiens)		GO:0033391
PMZ_0030998	Frmd4a	scaf_00027	897817	933482	243.699	2.1794	0.586028	3.71351	0.000204401	0.00117089	Frmd4a		desc=FERM domain-containing protein 4A (Mus musculus)	GO:0005856
PMZ_0031015	MED27	scaf_00024	12661618	12676401	530.093	1.28571	0.390106	3.29517	0.000983616	0.00444757	MED27	MED27	desc=Mediator of RNA polymerase II transcription subunit 27 (Bos taurus)		GO:0005737
PMZ_0031016	TSC1	scaf_00024	12604266	12627230	2306.9	1.34003	0.417845	3.20627	0.00134468	0.00578527	TSC1	TSC1	desc=Hamartin (Homo sapiens)		GO:0005884
PMZ_0031029	GNAS	scaf_00008	14621606	14628096	352.907	2.12982	0.422226	5.04361	4.57e-07	6.02e-06	GNAS	GS	desc=Guanine nucleotide-binding protein G(s) subunit alpha isoforms short (Bos taurus)	GO:0003924,GO:0004871,GO:0005525,GO:0007186,GO:0019001,GO:0031683	GO:0005886
PMZ_0031030	UMOD	scaf_00008	14651916	14654570	7949.07	4.40939	1.05309	4.16929	3.06e-05	0.000231123	UMOD	UROM	desc=Uromodulin (Homo sapiens)		GO:0031225
PMZ_0031034		scaf_00005	19608982	19617021	105.367	3.92264	0.763766	5.12978	2.9e-07	4.11e-06
PMZ_0031042	HSD3B	scaf_00003	13804096	13810936	693.744	4.11043	0.788895	5.21518	1.84e-07	2.77e-06	HSD3B	3BHS	desc=3 beta-hydroxysteroid dehydrogenase/Delta 5-->4-isomerase (Canis familiaris)	GO:0003854,GO:0006694,GO:0016616,GO:0055114
PMZ_0031082	TEX264	scaf_00027	6911951	6914871	33.2996	2.38505	0.729591	3.26567	0.00109206	0.00485873	TEX264		desc=Testis-expressed sequence 264 protein (Homo sapiens)
PMZ_0031085	DHDDS	scaf_00027	7292836	7296465	118.09	2.19626	0.557465	3.93556	8.3e-05	0.000543046	DHDDS		desc=Dehydrodolichyl diphosphate syntase complex subunit DHDDS (Homo sapiens)	GO:0016765
PMZ_0031160	VIL1	scaf_00038	3907530	3915544	86.2672	2.08929	0.548398	3.81245	0.000137594	0.000837282	VIL1	AVIL	desc=Villin-1 (Gallus gallus)	GO:0003779,GO:0010975	GO:0015629
PMZ_0031174	TBL3	scaf_00003	21127207	21143671	1295.31	2.33334	0.329699	7.07852	1.46e-12	9.25e-11	TBL3		desc=Transducin beta-like protein 3 (Bos taurus)	GO:0005515,GO:0006364,GO:0032040
PMZ_0031223		scaf_00005	6787516	6795087	14602.8	7.5451	0.772959	9.74837	1.87e-22	7.43e-20		TBA		GO:0003924,GO:0005200,GO:0005525,GO:0005874,GO:0007017,GO:0043234,GO:0051258	GO:0005737
PMZ_0031254	otx5	scaf_00009	16001035	16013154	95.5551	5.54385	1.26135	4.29731	1.73e-05	0.000141666	otx5		desc=Homeobox protein otx5 (Xenopus tropicalis)	GO:0003677
PMZ_0031257	ABHD17B	scaf_00006	16444067	16474794	1640.59	2.76383	0.522823	5.28408	1.26e-07	2.01e-06	ABHD17B	AB17B/AB17C	desc=Alpha/beta hydrolase domain-containing protein 17B (Gallus gallus)		GO:0016787
PMZ_0031259	Fam174a	scaf_00052	6931927	6941779	1069.77	2.00777	0.539404	3.72136	0.000198149	0.00114213	Fam174a	F174A	desc=Membrane protein FAM174A (Mus musculus)		GO:0016021
PMZ_0031276	Tgm1	scaf_00008	4482543	4512911	77.1639	1.99008	0.625154	3.18986	0.00142344	0.00607564	Tgm1	TGM1	desc=Protein-glutamine gamma-glutamyltransferase K (Rattus norvegicus)	GO:0003810,GO:0018149	GO:0005913
PMZ_0031305	DOS	scaf_00043	9458323	9473418	181.249	2.67966	0.567492	4.72304	2.32e-06	2.49e-05	DOS	DOS	desc=Protein Dos (Homo sapiens)		GO:0016021
PMZ_0031369	VSNL1	scaf_00056	5630848	5639895	72.2197	2.60279	0.862078	3.02056	0.00252309	0.00972056	VSNL1		desc=Visinin-like protein 1 (Bos taurus)	GO:0005509,GO:0019722
PMZ_0031414	CACHD1	scaf_00043	3228020	3278167	982.905	2.55206	0.540435	4.7218	2.34e-06	2.5e-05	CACHD1	CAHD1	desc=VWFA and cache domain-containing protein 1 (Homo sapiens)		GO:0016021
PMZ_0031422	SPSB4	scaf_00039	872503	915206	624.6	1.55399	0.319199	4.8705	1.11e-06	1.3e-05	SPSB4		desc=SPRY domain-containing SOCS box protein 4 (Homo sapiens)	GO:0005515,GO:0035556
PMZ_0031464	Urb1	scaf_00004	5100477	5167567	766.789	1.20615	0.383013	3.14804	0.00164371	0.00683267	Urb1	NPA1P	desc=Nucleolar pre-ribosomal-associated protein 1 (Mus musculus)		GO:0005730
PMZ_0031473	SNX24	scaf_00076	905087	914247	1162.96	1.95775	0.596544	3.27953	0.00103981	0.00466045	SNX24		desc=Sorting nexin-24 (Homo sapiens)	GO:0035091
PMZ_0031496	P2RY1	scaf_00077	211168	212274	57.4918	5.38307	0.813021	6.48412	8.93e-11	3.5e-09	P2RY1	P2RY1	desc=P2Y purinoceptor 1 (Homo sapiens)	GO:0004930,GO:0007186,GO:0007200,GO:0016021,GO:0030168,GO:0045028,GO:0090075	GO:0016021
PMZ_0031561	METRN	scaf_00037	10558981	10573416	31.1798	2.7756	0.710803	3.89578	9.79e-05	0.000626882	METRN	METRL	desc=Meteorin (Homo sapiens)		GO:0005615
PMZ_0031567	camk2d	scaf_00132	343730	388657	149.485	1.48201	0.481856	3.07674	0.00209279	0.00832871	camk2d		desc=Calcium/calmodulin-dependent protein kinase type II delta chain (Xenopus laevis)	GO:0004672,GO:0004683,GO:0005516,GO:0005524,GO:0006468,GO:0016772
PMZ_0031575	SLC15A2	scaf_00140	276408	281006	17.8661	3.44222	0.938574	3.62708	0.000286642	0.00155793	SLC15A2		desc=Solute carrier family 15 member 2 (Homo sapiens)	GO:0005215,GO:0006810,GO:0006857,GO:0016020
PMZ_0031577	SGSM3	scaf_00003	20797948	20818962	413.414	2.42306	0.627532	3.85638	0.00011508	0.000721103	SGSM3		desc=Small G protein signaling modulator 3 (Homo sapiens)	GO:0005515
PMZ_0031581	CDC42EP5	scaf_00011	11130743	11131923	237.517	1.9084	0.612105	3.10907	0.00187678	0.00762713	CDC42EP5	BORG4	desc=Cdc42 effector protein 5 (Homo sapiens)		GO:0015629
PMZ_0031606	Psmd9	scaf_00054	1213549	1232862	949.312	1.26339	0.373393	3.38559	0.000710259	0.00337991	Psmd9		desc=26S proteasome non-ATPase regulatory subunit 9 (Rattus norvegicus)
PMZ_0031626	Chaf1a	scaf_00031	3195822	3219332	3070.29	3.35584	0.518332	6.47272	9.63e-11	3.72e-09	Chaf1a	CAF1A	desc=Chromatin assembly factor 1 subunit A (Mus musculus)		GO:0033186
PMZ_0031638	Ctnnd2	scaf_00100	800854	846438	51.2527	2.12594	0.620782	3.42213	0.000621322	0.00301089	Ctnnd2	CTND2	desc=Catenin delta-2 (Fragment) (Rattus norvegicus)	GO:0005488,GO:0005515,GO:0016337	GO:0005912
PMZ_0031652	PRSS12	scaf_00012	1168722	1183215	48.1964	2.69382	0.726125	3.70174	0.000214128	0.00121906	PRSS12	NETR	desc=Neurotrypsin (Pan troglodytes)	GO:0005044,GO:0016020	GO:0030424
PMZ_0031662	Tmc5	scaf_00019	6934911	6958961	476.45	1.95209	0.646267	3.03047	0.00244171	0.00945392	Tmc5	TMC6/TMC5	desc=Transmembrane channel-like protein 5 (Rattus norvegicus)	GO:0016021	GO:0016021
PMZ_0031702	UNC50	scaf_00021	6839275	6847424	1640.1	1.39225	0.342934	4.06234	4.86e-05	0.000343915	UNC50	UNC50	desc=Protein unc-50 homolog (Bos taurus)		GO:0000139
PMZ_0031703	WDR44	scaf_00051	121486	142334	87.5276	2.03012	0.57253	3.54325	0.000395227	0.00204564	WDR44	WDR44	desc=WD repeat-containing protein 44 (Homo sapiens)		GO:0005829
PMZ_0031711	DUSP10	scaf_00029	3030102	3033260	14.0908	3.66341	0.84831	4.24336	2.2e-05	0.000174518	DUSP10	DUS10	desc=Dual specificity protein phosphatase 10 (Bos taurus)	GO:0006470,GO:0017017	GO:0005794
PMZ_0031743	KANSL2	scaf_00004	24737886	24740400	1525.38	2.01229	0.481998	4.17449	2.99e-05	0.000226967	KANSL2	KANL2	desc=KAT8 regulatory NSL complex subunit 2 (Bos taurus)	GO:0000123	GO:0000123
PMZ_0031751	Lrrc3	scaf_00004	6160081	6160848	91.81	2.53456	0.775015	3.26098	0.0011103	0.00491806	Lrrc3	LRC3B	desc=Leucine-rich repeat-containing protein 3 (Mus musculus)	GO:0005515	GO:0016021
PMZ_0031779		scaf_00073	2020281	2048767	1162.31	1.32998	0.395778	3.3624	0.000772671	0.00362978				GO:0003676,GO:0046872
PMZ_0031831	ZSWIM8	scaf_00044	2250533	2252373	33.2593	2.34965	0.755171	3.09254	0.00198454	0.00798626	ZSWIM8		desc=Zinc finger SWIM domain-containing protein 8 (Bos taurus)
PMZ_0031847	DMBT1	scaf_00076	716024	728614	123516	3.9388	1.17377	3.32431	0.000886381	0.00406371	DMBT1		desc=Deleted in malignant brain tumors 1 protein (Homo sapiens)
PMZ_0031854	CDK17	scaf_00065	1612921	1651697	438.316	1.7625	0.393647	4.47846	7.52e-06	6.87e-05	CDK17		desc=Cyclin-dependent kinase 17 (Homo sapiens)	GO:0004672,GO:0005524,GO:0006468,GO:0016772
PMZ_0031856	rtn1	scaf_00047	6132593	6157112	202.023	1.41852	0.435055	3.26099	0.00111024	0.00491806	rtn1		desc=Reticulon-1-A (Xenopus laevis)
PMZ_0031862	FTSJ2	scaf_00003	13520374	13521133	65.3394	3.51125	1.7256	7.03453	2e-12	1.22e-10	FTSJ2	MRM2	desc=rRNA methyltransferase 2%2C mitochondrial (Homo sapiens)	GO:0001510,GO:0008168,GO:0032259	GO:0005739
PMZ_0031867	Heph	scaf_00051	7798508	7801665	481.438	5.0516	0.815024	6.18884	6.06e-10	1.9e-08	Heph	HPHL1/HEPH	desc=Hephaestin (Mus musculus)	GO:0004322,GO:0005507,GO:0006825,GO:0006879	GO:0016323
PMZ_0031885	SLC10A3	scaf_00045	4371164	4372623	1147.83	4.07509	0.472491	8.62636	6.33e-18	1.08e-15	SLC10A3	P3	desc=P3 protein (Homo sapiens)	GO:0016020,GO:0016021,GO:0055085	GO:0016021
PMZ_0031898	KMT2E	scaf_00049	1154139	1214653	599.372	1.63083	0.466308	3.49792	0.000468893	0.00237009	KMT2E	KMT2E/SETD5	desc=Histone-lysine N-methyltransferase 2E (Homo sapiens)
PMZ_0031933		scaf_00095	1015710	1021935	454.282	1.83485	0.465897	3.93748	8.23e-05	0.000539829
PMZ_0031949	SNUPN	scaf_00060	150832	156370	468.454	1.53755	0.371483	4.13686	3.52e-05	0.000260459	SNUPN	SPN1	desc=Snurportin-1 (Bos taurus)		GO:0005737
PMZ_0031968	Tmem145	scaf_00030	608255	619958	259.896	2.28163	0.614653	3.70862	0.000208389	0.00119057	Tmem145		desc=Transmembrane protein 145 (Mus musculus)	GO:0007186,GO:0019236
PMZ_0031985	ADAT1	scaf_00008	12222563	12232136	343.536	1.99123	0.553226	3.60235	0.000315359	0.00168896	ADAT1	ADAT1	desc=tRNA-specific adenosine deaminase 1 (Macaca fascicularis)	GO:0003723,GO:0004000,GO:0006396	GO:0046872
PMZ_0032004	depdc7	scaf_00155	316113	327120	1897.89	5.67549	0.758344	7.47726	7.59e-14	6.19e-12	depdc7		desc=DEP domain-containing protein 7 (Danio rerio)	GO:0035556
PMZ_0032053	Gdi2	scaf_00163	144092	178228	4341.48	1.4332	0.332798	4.30707	1.65e-05	0.000136511	Gdi2	GDIA	desc=Rab GDP dissociation inhibitor beta (Mus musculus)	GO:0005093,GO:0005515,GO:0015031	GO:0005794
PMZ_0032081	ALOX5	scaf_00051	1927576	1938149	11174	4.87756	0.920106	5.29598	1.18e-07	1.9e-06	ALOX5	LOX5	desc=Arachidonate 5-lipoxygenase (Homo sapiens)	GO:0005506,GO:0016702,GO:0046872,GO:0055114	GO:0005829
PMZ_0032086	N4BP1	scaf_00059	2322577	2354266	1046.4	1.63328	0.478892	3.40693	0.000656982	0.00315575	N4BP1	N4BP1	desc=NEDD4-binding protein 1 (Gallus gallus)		GO:0005730
PMZ_0032112		scaf_00046	5023275	5057841	362.17	1.44478	0.385509	3.74856	0.000177855	0.00103968				GO:0003676,GO:0046872
PMZ_0032114	srf	scaf_00036	619485	625428	347.536	2.92267	0.616586	4.73217	2.22e-06	2.39e-05	srf	SRF	desc=Serum response factor (Xenopus laevis)		GO:0005634
PMZ_0032115	mios	scaf_00166	285078	295032	3137.79	2.74254	0.520555	5.26651	1.39e-07	2.19e-06	mios	MIOA/MIO	desc=WD repeat-containing protein mio (Danio rerio)	GO:0005515	GO:0005765
PMZ_0032120	AGO1	scaf_00001	7178183	7200427	203.735	2.01664	0.662877	3.04097	0.00235815	0.00919082	AGO1	AGO1	desc=Protein argonaute-1 (Homo sapiens)	GO:0005515	GO:0005737
PMZ_0032136	Sort1	scaf_00065	2001034	2018082	850.583	1.80862	0.573788	3.14973	0.00163419	0.00679893	Sort1		desc=Sortilin (Mus musculus)	GO:0005515,GO:0016021
PMZ_0032144	ECT2	scaf_00051	6432354	6499166	1080.07	1.8341	0.48527	3.77548	0.000159698	0.000948663	ECT2	ECT2	desc=Protein ECT2 (Homo sapiens)	GO:0000902,GO:0000910,GO:0005085,GO:0005089,GO:0005096,GO:0005634,GO:0005737,GO:0035023,GO:0035556,GO:0045666	GO:0005911
PMZ_0032147	Nlgn1	scaf_00051	6514861	6515316	33.4384	3.54639	0.888314	3.96044	7.48e-05	0.000497345	Nlgn1	NLGN1	desc=Neuroligin-1 (Mus musculus)		GO:0030054
PMZ_0032148	Nlgn3	scaf_00051	6524334	6535262	216.626	2.10257	0.502524	4.18262	2.88e-05	0.000220291	Nlgn3	NLGN3	desc=Neuroligin-3 (Mus musculus)	GO:0005887,GO:0007155,GO:0016020,GO:0042043,GO:0045202,GO:0050808	GO:0030054
PMZ_0032150	nol6	scaf_00102	209050	226296	1204.89	2.57789	0.515373	5.00418	5.61e-07	7.14e-06	nol6	NOL6	desc=Nucleolar protein 6 (Xenopus tropicalis)		GO:0005730
PMZ_0032181	PHKB	scaf_00033	8563542	8599418	349.75	2.90785	0.429547	6.77125	1.28e-11	6.22e-10	PHKB	KPBB	desc=Phosphorylase b kinase regulatory subunit beta (Homo sapiens)	GO:0005516,GO:0005977,GO:0016020	GO:0005829
PMZ_0032243	YWHAG	scaf_00266	82618	104210	202.697	1.40985	0.409904	3.4391	0.000583644	0.00285646	YWHAG	1433G	desc=14-3-3 protein gamma (Homo sapiens)	GO:0019904	GO:0005737
PMZ_0032265	hspa5	scaf_00063	3800938	3808813	17311.5	3.49593	0.509382	6.87005	6.42e-12	3.4e-10	hspa5		desc=78 kDa glucose-regulated protein (Xenopus laevis)
PMZ_0032279	Fosb	scaf_00046	3125429	3127191	6.48897	4.34896	1.34371	3.1262	0.0017708	0.00727225	Fosb		desc=Protein fosB (Mus musculus)	GO:0003677,GO:0003700,GO:0005634,GO:0006357
PMZ_0032282		scaf_00014	3532407	3535218	246.891	3.25161	0.759079	4.28741	1.81e-05	0.00014735
PMZ_0032295	MAP4K4	scaf_00061	1775378	1792227	96.8615	1.70643	0.543781	3.1363	0.00171096	0.00706834	MAP4K4	TNIK	desc=Mitogen-activated protein kinase kinase kinase kinase 4 (Homo sapiens)	GO:0004672,GO:0005524,GO:0006468,GO:0016772	GO:0005737
PMZ_0032299		scaf_00044	8684596	8690817	385.654	5.50829	0.691231	7.9015	2.76e-15	2.88e-13
PMZ_0032312	ZNF705E	scaf_00073	1415376	1419092	173.667	3.20573	0.580744	5.5077	3.64e-08	6.83e-07	ZNF705E	EGR4	desc=Putative zinc finger protein 705E (Homo sapiens)	GO:0003676,GO:0046872	GO:0005737
PMZ_0032354	Rgma	scaf_00006	20175086	20183851	508.289	1.69349	0.4792	3.54513	0.000392419	0.00203381	Rgma	RGMA	desc=Repulsive guidance molecule A (Mus musculus)		GO:0031225
PMZ_0032356	EFNA3	scaf_00006	20088774	20092819	148.454	2.53837	0.430072	5.90056	3.62e-09	8.93e-08	EFNA3	EF3	desc=Ephrin-A3 (Homo sapiens)	GO:0016020	GO:0031225
PMZ_0032371		scaf_00053	2332782	2345708	138.141	2.30397	0.643384	3.59027	0.000330333	0.00175753			Note=Protein of unknown function	GO:0005515
PMZ_0032385	SLC35F1	scaf_00017	2506412	2540221	885.25	1.89765	0.414918	4.57785	4.7e-06	4.59e-05	SLC35F1	S35F1	desc=Solute carrier family 35 member F1 (Homo sapiens)	GO:0006810,GO:0016021	GO:0016021
PMZ_0032391		scaf_00023	10971698	10975973	285.577	1.29339	0.399354	3.23854	0.00120144	0.00525865		CS052
PMZ_0032393	MARCKS	scaf_00031	6469126	6502161	364.375	3.03354	0.544516	5.57646	2.45e-08	4.79e-07	MARCKS	ZN608	desc=Myristoylated alanine-rich C-kinase substrate (Homo sapiens)		GO:0046872
PMZ_0032418		scaf_00042	3029060	3059677	372.327	2.75983	0.491423	5.61113	2.01e-08	4.02e-07
PMZ_0032423	dbr1	scaf_00053	2094614	2112084	317.433	1.66548	0.536578	3.09904	0.0019415	0.00784558	dbr1	DBR1	desc=Lariat debranching enzyme (Danio rerio)	GO:0006397,GO:0016787,GO:0016788	GO:0005634
PMZ_0032461	SLC6A8	scaf_00049	940999	947978	97.1548	5.25542	0.693563	7.51334	5.76e-14	4.72e-12	SLC6A8	SC6A4/SC6A8	desc=Sodium- and chloride-dependent creatine transporter 1 (Bos taurus)	GO:0005328,GO:0006836,GO:0016021	GO:0005887
PMZ_0032463	SLC6A3	scaf_00049	933752	940140	116.851	4.46116	0.788625	5.6422	1.68e-08	3.45e-07	SLC6A3	SC6A8	desc=Sodium-dependent dopamine transporter (Homo sapiens)	GO:0005328,GO:0006836,GO:0016021	GO:0016021
PMZ_0032496	ARRB1	scaf_00001	15163446	15181996	448.452	3.84711	0.484275	7.94477	1.95e-15	2.11e-13	ARRB1	ARRB1	desc=Beta-arrestin-1 (Homo sapiens)	GO:0007165	GO:0005905
PMZ_0032504	sox1	scaf_00058	1589978	1619188	466.137	2.746	0.51308	5.34951	8.82e-08	1.48e-06	sox1		desc=Transcription factor Sox-1 (Xenopus laevis)
PMZ_0032520	Iba57	scaf_00053	1585287	1610764	528.348	1.57175	0.400714	3.92134	8.81e-05	0.000573031	Iba57	CAF17	desc=Putative transferase CAF17 homolog%2C mitochondrial (Mus musculus)	GO:0003676,GO:0004386,GO:0005524,GO:0008026	GO:0005739
PMZ_0032535	pan1	scaf_00018	12744830	12747866	105.855	2.11648	0.616133	3.42962	0.000604426	0.00294555	pan1		desc=Actin cytoskeleton-regulatory complex protein pan1 (Aspergillus clavatus (strain ATCC 1007 / CBS 513.65 / DSM 816 / NCTC 3887 / NRRL 1))
PMZ_0032551		scaf_00006	18313366	18315771	52.922	2.88057	0.703723	4.07987	4.51e-05	0.000323237
PMZ_0032552	ISL2	scaf_00006	18371158	18388204	21.2735	2.96547	0.893837	3.29948	0.000968656	0.00438707	ISL2	ISL1/ISL3	desc=Insulin gene enhancer protein ISL-2 (Homo sapiens)	GO:0008270	GO:0005634
PMZ_0032558	Slc5a6	scaf_00002	14078733	14114174	1399.51	2.36648	0.537528	4.40391	1.06e-05	9.27e-05	Slc5a6	SC5A6	desc=Sodium-dependent multivitamin transporter (Rattus norvegicus)	GO:0005215,GO:0006810,GO:0016020,GO:0055085	GO:0016021
PMZ_0032584	mgat4b	scaf_00021	7053267	7068027	81.7782	2.12989	0.463074	4.60506	4.12e-06	4.1e-05	mgat4b	MGT4B	desc=Alpha-1%2C3-mannosyl-glycoprotein 4-beta-N-acetylglucosaminyltransferase B (Danio rerio)	GO:0005975,GO:0016020,GO:0016758	GO:0000139
PMZ_0032594		scaf_00051	7650327	7653759	43.1614	2.57885	0.555326	4.63642	3.55e-06	3.61e-05
PMZ_0032617	TONSL	scaf_00084	1018082	1056439	316.506	1.8311	0.576158	3.17098	0.00151927	0.00640866	TONSL	TONSL	desc=Tonsoku-like protein (Homo sapiens)		GO:0005737
PMZ_0032637		scaf_00002	13566620	13575394	69.7046	3.03498	0.95835	3.15563	0.00160152	0.0066888		MUC2L	Note=Similar to Intestinal mucin-like protein (Fragment) (Rattus norvegicus)		GO:0005576
PMZ_0032638	CNOT4	scaf_00002	13554123	13564614	1931.6	1.5106	0.494004	3.05897	0.00222102	0.00875649	CNOT4	CNOT4	desc=CCR4-NOT transcription complex subunit 4 (Homo sapiens)	GO:0046872	GO:0030014
PMZ_0032644	Bcar1	scaf_00008	3751051	3755416	37.3367	2.18073	0.66632	3.27046	0.00107371	0.00479247	Bcar1	BCAR1	desc=Breast cancer anti-estrogen resistance protein 1 (Mus musculus)	GO:0005515	GO:0005737
PMZ_0032662		scaf_00086	1616662	1621097	62.6857	3.23907	0.832947	3.87433	0.000106917	0.000675839
PMZ_0032664	myca	scaf_00002	423462	432842	1493.3	1.7971	0.438151	4.10889	3.98e-05	0.000289782	myca	MYCL	desc=Transcriptional regulator Myc-1 (Cyprinus carpio)	GO:0003700,GO:0005634,GO:0006355	GO:0005634
PMZ_0032668	PMVK	scaf_00080	847122	857582	109.424	2.33429	0.565928	4.12168	3.76e-05	0.000276013	PMVK	PMVK	desc=Phosphomevalonate kinase (Fragment) (Sus scrofa)	GO:0004631,GO:0005737,GO:0006695	GO:0005777
PMZ_0032701		scaf_00037	6791958	6794712	39.8295	3.72273	1.04357	3.53477	0.000408129	0.00210457
PMZ_0032706	Ikbip	scaf_00051	6983407	6987002	288.703	2.08517	0.544114	3.8291	0.000128612	0.000790598	Ikbip	IKIP	desc=Inhibitor of nuclear factor kappa-B kinase-interacting protein (Rattus norvegicus)		GO:0005783
PMZ_0032719	RBG2	scaf_00045	5955552	5963943	178.654	2.10715	0.483777	4.35156	1.35e-05	0.000113962	RBG2		desc=Glycine-rich RNA-binding protein 2%2C mitochondrial (Arabidopsis thaliana)
PMZ_0032746	WDR26	scaf_00036	892265	916328	2215.66	1.54107	0.354059	4.35121	1.35e-05	0.000114073	WDR26	WDR26	desc=WD repeat-containing protein 26 (Homo sapiens)	GO:0005515	GO:0005737
PMZ_0032753	Galnt18	scaf_00064	242876	269764	81.1141	3.75803	0.75011	4.99524	5.88e-07	7.39e-06	Galnt18		desc=Polypeptide N-acetylgalactosaminyltransferase 18 (Mus musculus)
PMZ_0032759		scaf_00032	3978854	3985844	792.235	2.4441	0.360001	6.79476	1.08e-11	5.32e-10
PMZ_0032769		scaf_00060	684425	687571	390.249	3.01378	0.575395	5.22793	1.71e-07	2.62e-06		PJA2			GO:0030054
PMZ_0032783	blm	scaf_00036	9067480	9090776	1331.46	2.0047	0.540518	3.69882	0.000216606	0.00123136	blm	BLM	desc=Bloom syndrome protein homolog (Xenopus laevis)	GO:0003676,GO:0005524,GO:0006260,GO:0006281,GO:0008026,GO:0043140	GO:0005634
PMZ_0032794	PHYH	scaf_00004	8340839	8348862	147.864	4.30201	0.884074	4.85505	1.2e-06	1.39e-05	PHYH	PAHX	desc=Phytanoyl-CoA dioxygenase%2C peroxisomal (Homo sapiens)		GO:0005739
PMZ_0032811	SNIP1	scaf_00058	1373531	1385881	919.341	1.6292	0.498863	3.26454	0.00109642	0.00487068	SNIP1		desc=Smad nuclear-interacting protein 1 (Homo sapiens)	GO:0005515
PMZ_0032817	Tpst2	scaf_00038	8432397	8444603	407.518	2.08577	0.393412	5.29847	1.17e-07	1.88e-06	Tpst2	TPST1/TPST2	desc=Protein-tyrosine sulfotransferase 2 (Mus musculus)	GO:0006478,GO:0008476	GO:0000139
PMZ_0032822	B4galt1	scaf_00043	2938291	2951415	254.586	2.3445	0.444299	5.27564	1.32e-07	2.09e-06	B4galt1	B4GT1	desc=Beta-1%2C4-galactosyltransferase 1 (Mus musculus)	GO:0005975,GO:0016757	GO:0016323
PMZ_0032827	Fam174b	scaf_00031	2997106	3002053	122.956	2.23392	0.431163	5.18081	2.21e-07	3.24e-06	Fam174b		desc=Membrane protein FAM174B (Mus musculus)
PMZ_0032849	Fuca1	scaf_00002	2204827	2216656	530.2	2.04694	0.47788	4.28598	1.82e-05	0.000148118	Fuca1	FUCO	desc=Tissue alpha-L-fucosidase (Mus musculus)	GO:0004560,GO:0005975	GO:0070062
PMZ_0032863	pi4k2a	scaf_00032	7404602	7423081	1031.43	1.6446	0.346456	4.74621	2.07e-06	2.25e-05	pi4k2a		desc=Phosphatidylinositol 4-kinase type 2-alpha (Danio rerio)	GO:0016773
PMZ_0032915	ZFHX3	scaf_00098	470682	478349	138.971	3.02341	0.829297	3.64418	0.000268243	0.00147442	ZFHX3	ZFHX4	desc=Zinc finger homeobox protein 3 (Homo sapiens)	GO:0003676,GO:0046872	GO:0005634
PMZ_0032935	NEFM	scaf_00015	14485293	14491565	456.014	5.28408	1.07582	4.88514	1.03e-06	1.22e-05	NEFM	NFM	desc=Neurofilament medium polypeptide (Homo sapiens)	GO:0005198,GO:0005882,GO:0005883	GO:0005883
PMZ_0033004	Gpr110	scaf_00017	1065810	1086292	239.328	3.01083	0.695658	4.32103	1.55e-05	0.000128866	Gpr110	AGRF5	desc=G-protein coupled receptor 110 (Mus musculus)	GO:0004888,GO:0004930,GO:0005515,GO:0007166,GO:0007186,GO:0016020,GO:0016021
PMZ_0033033	Eml1	scaf_00475	15717	32816	2923.28	2.84552	0.48985	5.80787	6.33e-09	1.46e-07	Eml1	EMAL1	desc=Echinoderm microtubule-associated protein-like 1 (Rattus norvegicus)	GO:0005515	GO:0005829
PMZ_0033035	NACA	scaf_00063	1022441	1046056	96.6464	2.27561	0.547455	4.15393	3.27e-05	0.000244545	NACA		desc=Nascent polypeptide-associated complex subunit alpha%2C muscle-specific form (Homo sapiens)	GO:0005515
PMZ_0033045	TRNT1	scaf_00049	4630570	4649017	599.015	2.19392	0.366538	5.98363	2.18e-09	5.81e-08	TRNT1	TRNT1	desc=CCA tRNA nucleotidyltransferase 1%2C mitochondrial (Homo sapiens)	GO:0003723,GO:0006396,GO:0016779	GO:0005622
PMZ_0033051	samd4a	scaf_00041	5020534	5033775	625.924	3.53533	0.643502	5.49227	3.97e-08	7.39e-07	samd4a		desc=Protein Smaug homolog 1 (Xenopus tropicalis)	GO:0005515
PMZ_0033124		scaf_00032	3815801	3831339	883.714	4.68408	0.722327	6.48436	8.91e-11	3.5e-09				GO:0003868,GO:0009072,GO:0016701,GO:0055114
PMZ_0033134	Gpr157	scaf_00039	8977633	9012530	203.855	2.46198	0.385818	6.38189	1.75e-10	6.23e-09	Gpr157		desc=Probable G-protein coupled receptor 157 (Mus musculus)
PMZ_0033176	ZNF391	scaf_00011	261653	267818	115.327	1.42049	0.39655	3.58021	0.000343321	0.00181618	ZNF391	ZN391	desc=Zinc finger protein 391 (Homo sapiens)	GO:0003676,GO:0046872	GO:0005634
PMZ_0033185	DNMBP	scaf_00015	1512278	1516569	21.9428	2.13648	0.682457	3.12382	0.00178519	0.00731741	DNMBP	DNMBP	desc=Dynamin-binding protein (Homo sapiens)	GO:0005089,GO:0035023	GO:0030054
PMZ_0033193	Maz	scaf_00007	4508768	4527486	546.772	1.81302	0.562582	3.21666	0.00129691	0.00561203	Maz	VEZF1	desc=Myc-associated zinc finger protein (Mus musculus)	GO:0003676,GO:0005515,GO:0046872	GO:0005634
PMZ_0033214		scaf_00665	1407	2276	55.724	2.8251	0.660087	4.26798	1.97e-05	0.000158448		UTP15			GO:0005730
PMZ_0033215	Actn	scaf_00029	5094512	5107343	645.366	1.85802	0.607961	3.05951	0.00221697	0.00874233	Actn	ACTN1	desc=Alpha-actinin%2C sarcomeric (Drosophila melanogaster)	GO:0005515,GO:0051015,GO:0051017,GO:0051764	GO:0030054
PMZ_0033228	KCNAB1	scaf_00039	8268349	8309076	466.154	1.94439	0.639097	3.03777	0.00238333	0.00927779	KCNAB1		desc=Voltage-gated potassium channel subunit beta-1 (Gallus gallus)	GO:0005249,GO:0005737,GO:0006813,GO:0016021,GO:0055085
PMZ_0033266		scaf_00008	4157662	4178363	8117.09	2.76112	0.615373	4.48216	7.39e-06	6.78e-05		TBB4B		GO:0003924,GO:0005200,GO:0005525,GO:0005874,GO:0007017	GO:0005737
PMZ_0033281	zgc:113413	scaf_00126	475094	484562	60693.1	5.48586	1.14331	4.74302	2.11e-06	2.29e-05	zgc:113413	TTL	desc=Natterin-like protein (Danio rerio)
PMZ_0033287	Aqp3	scaf_00026	352408	365901	34.4425	3.12041	0.978836	3.17319	0.00150771	0.00637158	Aqp3		desc=Aquaporin-3 (Mus musculus)	GO:0005215,GO:0006810,GO:0016020
PMZ_0033300	Alox12b	scaf_00802	2464	8456	3366.59	4.75004	0.915728	5.18332	2.18e-07	3.21e-06	Alox12b	LOXE3/LOX5	desc=Arachidonate 12-lipoxygenase%2C 12R-type (Mus musculus)	GO:0016702,GO:0046872,GO:0055114	GO:0005829
PMZ_0033357	Paqr9	scaf_00051	7023454	7061867	218.788	2.90093	0.642958	4.51057	6.47e-06	6.04e-05	Paqr9	PAQR9	desc=Progestin and adipoQ receptor family member 9 (Mus musculus)	GO:0016021	GO:0016021
PMZ_0033376	ZP4	scaf_07035	510	2478	12885.7	6.78922	0.990361	6.81326	9.54e-12	4.84e-10	ZP4	ZP2	desc=Zona pellucida sperm-binding protein 4 (Homo sapiens)		GO:0005783
PMZ_0033383	ZBTB4	scaf_00001	20814360	20818075	741.045	1.52902	0.438197	3.48779	0.000487028	0.00244711	ZBTB4	ZBTB4	desc=Zinc finger and BTB domain-containing protein 4 (Homo sapiens)	GO:0003676,GO:0005515,GO:0046872
PMZ_0033393		scaf_00019	11529679	11538959	15.3644	5.23024	1.118	4.4923	7.05e-06	6.52e-05			Note=Protein of unknown function	GO:0005515
PMZ_0033407		scaf_00011	5514651	5525125	106.18	3.73948	0.915787	4.06928	4.72e-05	0.000335405
PMZ_0033410		scaf_00032	4164335	4172459	244.118	2.51794	0.462367	5.44283	5.24e-08	9.4e-07			Note=Protein of unknown function	GO:0005085,GO:0007264,GO:0043547
PMZ_0033434	WNT11	scaf_00077	1067696	1071303	429.676	3.9875	0.703436	5.66985	1.43e-08	3.02e-07	WNT11	W11B1	desc=Protein Wnt-11 (Homo sapiens)	GO:0005102,GO:0005576,GO:0007275,GO:0016055	GO:0005576
PMZ_0033445	GALNT8	scaf_00064	298946	343584	224.739	2.44255	0.408557	5.98127	2.21e-09	5.87e-08	GALNT8		desc=Probable polypeptide N-acetylgalactosaminyltransferase 8 (Homo sapiens)
PMZ_0033462	dnajb6	scaf_00004	25027475	25033588	2787.87	2.2486	0.57167	3.93359	8.37e-05	0.000546791	dnajb6	DNJB6	desc=DnaJ homolog subfamily B member 6-B (Xenopus laevis)		GO:0005634
PMZ_0033483	ZP3	scaf_00090	780641	786867	12197.4	6.63855	1.1133	5.89956	3.64e-09	8.97e-08	ZP3	ZP3	desc=Zona pellucida sperm-binding protein 3 (Gallus gallus)		GO:0016021
PMZ_0033513	NOS1AP	scaf_00024	10907211	10984055	1586.58	2.84611	0.508414	5.60677	2.06e-08	4.1e-07	NOS1AP	DDC	desc=Carboxyl-terminal PDZ ligand of neuronal nitric oxide synthase protein (Homo sapiens)	GO:0003824,GO:0005515,GO:0006520,GO:0016831,GO:0019752,GO:0030170	GO:0030424
PMZ_0033518	TTC38	scaf_00052	7821491	7828667	447.076	2.26033	0.477502	4.73611	2.18e-06	2.36e-05	TTC38	TTC38	desc=Tetratricopeptide repeat protein 38 (Pongo abelii)
PMZ_0033526	DAAM2	scaf_00036	790774	806767	486.996	1.8327	0.495614	3.70628	0.000210322	0.00120063	DAAM2	DAAM1/DAAM2	desc=Disheveled-associated activator of morphogenesis 2 (Homo sapiens)	GO:0003779,GO:0005488,GO:0016043,GO:0017048,GO:0030036	GO:0070062
PMZ_0033543	Txndc15	scaf_00044	8562375	8569746	1298.33	1.64633	0.448318	3.67385	0.000238918	0.00133592	Txndc15		desc=Thioredoxin domain-containing protein 15 (Mus musculus)	GO:0045454
PMZ_0033546	Galnt13	scaf_00005	22694693	22772408	393.7	1.38464	0.438996	3.152	0.00162154	0.00676325	Galnt13	GLT13/GALT1	desc=Polypeptide N-acetylgalactosaminyltransferase 13 (Rattus norvegicus)		GO:0005576
PMZ_0033552	ABCB1	scaf_00053	518380	560324	385.741	3.32969	0.841586	3.95267	7.73e-05	0.000511314	ABCB1	MDR1	desc=Multidrug resistance protein 1 (Cricetulus griseus)	GO:0005524,GO:0006810,GO:0016021,GO:0016887,GO:0042626,GO:0055085	GO:0009986
PMZ_0033554	SFRP5	scaf_00015	108944	141781	967.485	1.87008	0.401984	4.65232	3.28e-06	3.38e-05	SFRP5	SFRP5	desc=Secreted frizzled-related protein 5 (Bos taurus)	GO:0003676,GO:0005515,GO:0046872	GO:0005737
PMZ_0033561	plk1	scaf_00011	14979640	14990395	3286.9	3.76516	0.617016	6.10277	1.04e-09	2.99e-08	plk1	POLO/PLK1	desc=Serine/threonine-protein kinase PLK1 (Xenopus tropicalis)	GO:0004672,GO:0005515,GO:0005524,GO:0006468,GO:0016772	GO:0005813
PMZ_0033562	ccndbp1	scaf_00033	10897782	10911847	2001.03	1.85959	0.48707	3.81652	0.000135347	0.000825207	ccndbp1	CCDB1	desc=Cyclin-D1-binding protein 1 homolog (Xenopus laevis)	GO:0051726	GO:0005737
PMZ_0033610		scaf_00047	6190520	6194044	27.734	2.17648	0.671724	3.23193	0.00122957	0.0053673
PMZ_0033614	SIX4	scaf_00029	8825489	8831793	70.3179	4.99887	0.995686	4.95587	7.2e-07	8.84e-06	SIX4	SIX4	desc=Homeobox protein SIX4 (Homo sapiens)	GO:0003677	GO:0005737
PMZ_0033617	CTNS	scaf_00137	292917	304271	660.349	3.29742	0.447159	7.37289	1.67e-13	1.28e-11	CTNS	CTNS	desc=Cystinosin (Bos taurus)		GO:0070062
PMZ_0033637	TRMT10C	scaf_00001	24322057	24326764	806.907	1.99133	0.559725	3.55608	0.000376427	0.00196773	TRMT10C	MRRP1	desc=Mitochondrial ribonuclease P protein 1 (Bos taurus)	GO:0005739	GO:0005739
PMZ_0033648	Aoc1	scaf_00004	8156799	8157699	83.7548	4.02399	0.79136	5.07192	3.94e-07	5.28e-06	Aoc1	AOC1	desc=Amiloride-sensitive amine oxidase [copper-containing] (Rattus norvegicus)	GO:0005507,GO:0008131,GO:0009308,GO:0048038,GO:0055114	GO:0005615
PMZ_0033649	Aoc1	scaf_00004	8157719	8172822	273.412	2.92101	0.527331	5.54769	2.89e-08	5.56e-07	Aoc1	AOC1	desc=Amiloride-sensitive amine oxidase [copper-containing] (Mus musculus)	GO:0005507,GO:0008131,GO:0009308,GO:0048038,GO:0055114	GO:0005615
PMZ_0033676	abcB1	scaf_00025	2153730	2172048	280.758	2.61521	0.477057	5.49094	4e-08	7.43e-07	abcB1	ABCB1	desc=ABC transporter B family member 1 (Dictyostelium discoideum)	GO:0005524,GO:0006810,GO:0016021,GO:0042626,GO:0055085	GO:0043190
PMZ_0033682	Kif20a	scaf_00176	18535	31086	255.654	4.43637	0.634137	6.99041	2.74e-12	1.62e-10	Kif20a	KI20A	desc=Kinesin-like protein KIF20A (Mus musculus)	GO:0003777,GO:0005524,GO:0005871,GO:0007018,GO:0008017	GO:0005794
PMZ_0033701	BMI1	scaf_00028	5543811	5548770	181.992	3.09694	0.840328	3.67542	0.000237457	0.00132851	BMI1	BMI1	desc=Polycomb complex protein BMI-1 (Felis catus)		GO:0000792
PMZ_0033720	Kcp	scaf_00134	410287	451189	116.144	2.68588	0.767697	3.50181	0.000462117	0.00233888	Kcp	FCGBP	desc=Kielin/chordin-like protein (Mus musculus)		GO:0070062
PMZ_0033756	slc25a25	scaf_00063	736580	782240	1499.29	2.40505	0.491905	4.88442	1.04e-06	1.22e-05	slc25a25		desc=Calcium-binding mitochondrial carrier protein SCaMC-2 (Xenopus tropicalis)	GO:0005509,GO:0055085
PMZ_0033764	Nck2	scaf_00077	1728969	1741039	544.967	2.49178	0.46564	5.3495	8.82e-08	1.48e-06	Nck2	NCK2	desc=Cytoplasmic protein NCK2 (Mus musculus)	GO:0005515	GO:0005737
PMZ_0033779		scaf_00059	2384644	2396113	2458.14	4.36209	0.810385	5.39177	6.98e-08	1.2e-06			Note=Protein of unknown function	GO:0005515
PMZ_0033780	ZP4	scaf_02353	10837	21016	773.633	5.49488	0.92716	5.90667	3.49e-09	8.67e-08	ZP4	ZP4	desc=Zona pellucida sperm-binding protein 4 (Homo sapiens)		GO:0005794
PMZ_0033786	ZP3	scaf_00478	14084	20716	74587.8	6.56082	1.09575	5.92633	3.1e-09	7.8e-08	ZP3	ZP3	desc=Zona pellucida sperm-binding protein 3 (Gallus gallus)		GO:0016021
PMZ_0033792	PDZD9	scaf_00013	14184806	14190291	309.868	4.72278	0.372895	12.6367	1.32e-36	4.29e-33	PDZD9	PDZD9	desc=PDZ domain-containing protein 9 (Homo sapiens)	GO:0005515
PMZ_0033795	Rbm7	scaf_00030	11532637	11549334	404.65	2.32968	0.714825	3.26203	0.00110615	0.00490236	Rbm7		desc=RNA-binding protein 7 (Mus musculus)	GO:0000166,GO:0003676
PMZ_0033796	PDE12	scaf_00042	4918267	4924065	980.811	2.56392	0.500824	5.12071	3.04e-07	4.26e-06	PDE12	PDE12	desc=2'%2C5'-phosphodiesterase 12 (Homo sapiens)		GO:0005759
PMZ_0033808	ANAPC7	scaf_00059	3054403	3075628	805.204	2.09667	0.530164	3.94771	7.89e-05	0.000520972	ANAPC7	APC7	desc=Anaphase-promoting complex subunit 7 (Homo sapiens)	GO:0005515	GO:0005680
PMZ_0033854	vph1	scaf_00245	48416	60172	928.533	2.21152	0.445953	4.97359	6.57e-07	8.18e-06	vph1		desc=V-type proton ATPase subunit a (Schizosaccharomyces pombe (strain 972 / ATCC 24843))	GO:0015078,GO:0015991,GO:0033179
PMZ_0033859	mycl1a	scaf_00056	5394284	5397122	19.7823	2.77643	0.841539	3.27997	0.00103817	0.00465415	mycl1a		desc=Protein L-Myc-1a (Danio rerio)	GO:0003700,GO:0005634,GO:0006355
PMZ_0033864	siah2l	scaf_00051	3270470	3309163	500.212	5.23617	0.648192	8.0708	6.98e-16	8.32e-14	siah2l	PRKX	desc=E3 ubiquitin-protein ligase Siah2 (Danio rerio)	GO:0004672,GO:0004674,GO:0005515,GO:0005524,GO:0005634,GO:0006468,GO:0006511,GO:0007275,GO:0016772	GO:0005737
PMZ_0033866	NEK7	scaf_00034	4078102	4091508	345.428	1.8838	0.45566	4.1357	3.54e-05	0.000261474	NEK7	NEK7	desc=Serine/threonine-protein kinase Nek7 (Homo sapiens)	GO:0004672,GO:0005524,GO:0006468,GO:0016772	GO:0005737
PMZ_0033885	PIM1	scaf_00042	4813496	4819822	784.534	2.03062	0.430467	4.71736	2.39e-06	2.55e-05	PIM1	PIM1	desc=Serine/threonine-protein kinase pim-1 (Felis catus)	GO:0004672,GO:0005524,GO:0006468,GO:0016772	GO:0005737
PMZ_0033898	MTAP	scaf_00046	2430407	2433402	188.648	3.33081	0.567614	5.86349	4.53e-09	1.09e-07	MTAP		desc=S-methyl-5'-thioadenosine phosphorylase (Homo sapiens)	GO:0003824,GO:0009116
PMZ_0033900	PELI1	scaf_00095	587531	603750	729.586	1.98479	0.525342	3.77709	0.000158673	0.000943155	PELI1	PELI1	desc=E3 ubiquitin-protein ligase pellino homolog 1 (Homo sapiens)	GO:0008063	GO:0005634
PMZ_0033901	COG8	scaf_00008	3485560	3487775	563.303	2.30043	0.59768	3.85216	0.000117082	0.000731056	COG8	COG8	desc=Conserved oligomeric Golgi complex subunit 8 (Bos taurus)	GO:0017119	GO:0000139
PMZ_0033905	Elovl7	scaf_00043	5125529	5137789	891.528	2.35027	0.522363	4.50955	6.5e-06	6.07e-05	Elovl7	ELOV7	desc=Elongation of very long chain fatty acids protein 7 (Mus musculus)	GO:0016021	GO:0005783
PMZ_0033910	Nle1	scaf_00038	2431078	2437997	1055.64	2.03677	0.362767	5.61906	1.92e-08	3.88e-07	Nle1	NLE1	desc=Notchless protein homolog 1 (Mus musculus)	GO:0005515	GO:0005730
PMZ_0033927	CCNK	scaf_00758	16280	28413	624.446	1.52827	0.384034	3.97926	6.91e-05	0.0004637	CCNK	CCNK	desc=Cyclin-K (Homo sapiens)	GO:0000079,GO:0006355,GO:0019901	GO:0005634
PMZ_0033930	KLHL28	scaf_00053	5964352	5988654	290.987	1.84731	0.532499	3.46791	0.000524522	0.00260451	KLHL28	KLH28	desc=Kelch-like protein 28 (Homo sapiens)	GO:0005515
PMZ_0033931	ZP4	scaf_00295	61903	68909	11931	4.66505	1.03898	4.47079	7.79e-06	7.08e-05	ZP4		desc=Zona pellucida sperm-binding protein 4 (Bos taurus)
PMZ_0033933	ZP3	scaf_02228	17045	20469	798.458	5.94731	0.963084	6.14138	8.18e-10	2.43e-08	ZP3		desc=Zona pellucida sperm-binding protein 3 (Gallus gallus)
PMZ_0033977	slc32a1	scaf_00011	6626348	6633356	50.867	3.12025	0.950817	3.26498	0.00109472	0.00486836	slc32a1	VIAAT	desc=Vesicular inhibitory amino acid transporter (Xenopus tropicalis)		GO:0030659
PMZ_0034052	Clk2	scaf_00265	27238	41608	2977.59	1.27405	0.396044	3.21885	0.00128707	0.00557196	Clk2	CLK2	desc=Dual specificity protein kinase CLK2 (Mus musculus)	GO:0004672,GO:0005524,GO:0006468,GO:0016772	GO:0016607
PMZ_0034054	Mars	scaf_00053	81284	97710	466.912	2.03144	0.535366	3.79289	0.000148902	0.000894381	Mars	SYMC	desc=Methionine--tRNA ligase%2C cytoplasmic (Mus musculus)	GO:0000166,GO:0004812,GO:0004825,GO:0005524,GO:0005737,GO:0006418,GO:0006431	GO:0005737
PMZ_0034063	infB	scaf_00032	3689555	3696302	476.697	2.38296	0.713372	3.33601	0.000849893	0.00392235	infB		desc=Translation initiation factor IF-2 (Desulfitobacterium hafniense (strain Y51))
PMZ_0034079	SLC2A1	scaf_00048	1222432	1253121	2442	1.8766	0.461804	4.07211	4.66e-05	0.000332111	SLC2A1	GTR1/GTR4	desc=Solute carrier family 2%2C facilitated glucose transporter member 1 (Oryctolagus cuniculus)	GO:0005215,GO:0016021,GO:0022857,GO:0055085	GO:0005905
PMZ_0034081	Aspg	scaf_00041	7669880	7707431	384.471	3.03839	0.548166	5.54459	2.95e-08	5.65e-07	Aspg		desc=60 kDa lysophospholipase (Rattus norvegicus)	GO:0005515,GO:0006520
PMZ_0034109	FLNC	scaf_03762	148	10985	1793.68	2.56492	0.738128	3.47649	0.000508014	0.00253456	FLNC	FLNC	desc=Filamin-C (Homo sapiens)	GO:0003779,GO:0005515,GO:0030036,GO:0030154	GO:0043034
PMZ_0034120	ZP3	scaf_00090	456198	468173	4677.2	6.35646	0.963066	6.56966	5.04e-11	2.11e-09	ZP3	ZP3	desc=Zona pellucida sperm-binding protein 3 (Gallus gallus)		GO:0016021
PMZ_0034158	Plk2	scaf_00043	5224071	5249984	236.607	4.4612	0.72114	6.18188	6.33e-10	1.96e-08	Plk2	PLK2	desc=Serine/threonine-protein kinase PLK2 (Rattus norvegicus)	GO:0004672,GO:0004674,GO:0005515,GO:0005524,GO:0006468,GO:0016772	GO:0005814
PMZ_0034225	ZP2	scaf_01702	2525	9035	4460.14	5.82428	0.904326	6.42608	1.31e-10	4.91e-09	ZP2		desc=Zona pellucida sperm-binding protein 2 (Bos taurus)
PMZ_0034245	ASTN1	scaf_00024	9802227	9813595	37.4852	2.46759	0.678578	3.63601	0.000276891	0.00151553	ASTN1	ASTN1	desc=Astrotactin-1 (Homo sapiens)		GO:0005768
PMZ_0034247	NTHL1	scaf_00071	2644029	2684065	539.314	1.70224	0.38726	4.39581	1.1e-05	9.58e-05	NTHL1	NTH	desc=Endonuclease III-like protein 1 (Bos taurus)	GO:0003677,GO:0003824,GO:0006281	GO:0005739
PMZ_0034271	TSPAN13	scaf_00053	5375048	5404175	382.237	2.13731	0.661651	3.23905	0.00119929	0.00525161	TSPAN13	TSN31	desc=Tetraspanin-13 (Bos taurus)	GO:0016021	GO:0016021
PMZ_0034282	CARD11	scaf_00026	1151456	1205223	267.766	2.2694	0.425928	5.33318	9.65e-08	1.6e-06	CARD11		desc=Caspase recruitment domain-containing protein 11 (Homo sapiens)	GO:0042981
PMZ_0034285		scaf_00064	1413732	1425355	88.3296	2.26069	0.654455	3.46171	0.000536765	0.00265647			Note=Similar to Glycine-rich cell wall structural protein 1.8 (Phaseolus vulgaris)	GO:0005509,GO:0005515,GO:0008152,GO:0016491
PMZ_0034290	CASP7	scaf_00012	11241809	11267269	50.369	2.27474	0.488989	4.64758	3.36e-06	3.45e-05	CASP7	CASP7	desc=Caspase-7 (Homo sapiens)	GO:0004197,GO:0006508,GO:0006915,GO:0008234	GO:0005737
PMZ_0034309	STX17	scaf_00053	4562085	4573971	701.642	2.97368	0.442008	6.72579	1.75e-11	8.15e-10	STX17	STX17	desc=Syntaxin-17 (Homo sapiens)	GO:0000046,GO:0000149,GO:0006888,GO:0097111	GO:0000421
PMZ_0034359	ZP3	scaf_02122	7457	22114	18525.8	6.1167	0.987279	6.16433	7.08e-10	2.15e-08	ZP3	ZP3	desc=Zona pellucida sperm-binding protein 3 (Gallus gallus)		GO:0016021
PMZ_0034428	Kif13a	scaf_00591	33870	44089	204.558	1.64939	0.472489	3.48913	0.000484592	0.00243739	Kif13a	KI13A	desc=Kinesin-like protein KIF13A (Mus musculus)	GO:0003777,GO:0005515,GO:0005871,GO:0007018	GO:0005813
PMZ_0034442	MORC2	scaf_00095	329984	351011	241.172	2.47377	0.5366	4.60315	4.16e-06	4.13e-05	MORC2	MORC2/MOR2B	desc=MORC family CW-type zinc finger protein 2 (Homo sapiens)		GO:0008270
PMZ_0034446	KLF2	scaf_00023	6576932	6584855	85.3082	2.56748	0.657241	3.90411	9.46e-05	0.000608921	KLF2	KLF2	desc=Krueppel-like factor 2 (Homo sapiens)	GO:0003676,GO:0046872	GO:0005634
PMZ_0034449	ALOX12	scaf_03552	1181	8835	1979.07	4.60975	0.993765	4.62636	3.72e-06	3.76e-05	ALOX12	LOX12/LOX5	desc=Arachidonate 12-lipoxygenase%2C 12S-type (Homo sapiens)	GO:0005515,GO:0016702,GO:0046872,GO:0055114	GO:0005829
PMZ_0034479	Rala	scaf_00016	6041862	6050713	1501.84	2.23227	0.564594	3.95434	7.67e-05	0.00050881	Rala	RALA	desc=Ras-related protein Ral-A (Mus musculus)	GO:0003924,GO:0005525,GO:0005622,GO:0005886,GO:0007165,GO:0007264,GO:0007265,GO:0015031,GO:0016020	GO:0032154
PMZ_0034494	CDH3	scaf_00059	5171802	5189046	7.89509	4.42869	1.10378	3.86853	0.000109492	0.000690992	CDH3	CADH1/CADHK	desc=Cadherin-3 (Fragment) (Sus scrofa)	GO:0005509,GO:0005886,GO:0007155,GO:0007156,GO:0016020	GO:0016021
PMZ_0034526	ZP2	scaf_03793	10584	13307	4383.26	6.09627	0.932005	6.51862	7.1e-11	2.87e-09	ZP2		desc=Zona pellucida sperm-binding protein 2 (Bos taurus)
PMZ_0034527	ZP2	scaf_03793	2766	5488	1241.3	4.62139	0.860999	5.36871	7.93e-08	1.35e-06	ZP2		desc=Zona pellucida sperm-binding protein 2 (Felis catus)
PMZ_0034531	RPAP1	scaf_00025	4879852	4914709	2244.27	1.23761	0.343043	3.60597	0.000310989	0.00167108	RPAP1	RPAP1	desc=RNA polymerase II-associated protein 1 (Homo sapiens)		GO:0005634
PMZ_0034550	STRADA	scaf_00053	5462273	5519697	1558.88	1.58114	0.3461	4.56666	4.96e-06	4.8e-05	STRADA	STRAA	desc=STE20-related kinase adapter protein alpha (Bos taurus)	GO:0004672,GO:0005524,GO:0006468,GO:0016012,GO:0016772	GO:0005737
PMZ_0034551	lmf2	scaf_00064	1788057	1808715	385.393	1.99786	0.626652	3.19206	0.00141263	0.00603349	lmf2		desc=Lipase maturation factor 2 (Xenopus laevis)
PMZ_0034552	Samd1	scaf_00064	1762396	1774293	13.509	4.30218	1.05062	3.95876	7.53e-05	0.000500333	Samd1		desc=Atherin (Mus musculus)
PMZ_0034557	tmem201	scaf_00048	5055115	5077908	152.809	2.5693	0.620729	4.13818	3.5e-05	0.000259451	tmem201	TM201	desc=Transmembrane protein 201 (Danio rerio)		GO:0016021
PMZ_0034578		scaf_00397	60261	67658	222.122	2.22289	0.557358	3.98881	6.64e-05	0.000448677			Note=Similar to Glycine%2C alanine and asparagine-rich protein (Haliotis asinina)
PMZ_0034584	ZP3	scaf_06257	1581	8086	10398.4	5.96165	0.96863	6.1311	8.73e-10	2.56e-08	ZP3		desc=Zona pellucida sperm-binding protein 3 (Gallus gallus)
PMZ_0034610	lmo4.1	scaf_00034	11167184	11168984	37.9006	2.45735	0.795251	3.08869	0.00201043	0.00807538	lmo4.1	LMO41	desc=LIM domain transcription factor LMO4.1 (Xenopus tropicalis)	GO:0008270	GO:0003712
PMZ_0034612	Bcas3	scaf_02218	11878	19826	231.55	1.71081	0.335662	5.09544	3.48e-07	4.77e-06	Bcas3	K1161	desc=Breast carcinoma-amplified sequence 3 homolog (Mus musculus)	GO:0003824,GO:0004553,GO:0005975	GO:0016021
PMZ_0034614	RAB32	scaf_00050	6891200	6896887	214.093	5.19237	0.829299	6.23633	4.48e-10	1.44e-08	RAB32	RAB32	desc=Ras-related protein Rab-32 (Homo sapiens)	GO:0005525,GO:0007264,GO:0015031	GO:0005769
PMZ_0034623	Syt7	scaf_00055	4108017	4129626	21.7084	2.17169	0.706672	3.06848	0.00215154	0.00853075	Syt7	SYT7	desc=Synaptotagmin-7 (Mus musculus)	GO:0005515,GO:0006887,GO:0016020	GO:0030054
PMZ_0034632	ZP3	scaf_00090	316796	328668	1770.19	5.09797	0.975971	5.207	1.92e-07	2.88e-06	ZP3	ZP3	desc=Zona pellucida sperm-binding protein 3 (Gallus gallus)		GO:0016021
PMZ_0034679	ORC5	scaf_00065	3213761	3237140	670.407	1.80962	0.401873	4.50198	6.73e-06	6.27e-05	ORC5		desc=Origin recognition complex subunit 5 (Homo sapiens)	GO:0000808,GO:0003824,GO:0005634,GO:0006260
PMZ_0034680		scaf_00045	6922987	6928574	1664.45	1.37357	0.401599	3.41127	0.000646607	0.00311439
PMZ_0034694	CECR1	scaf_00064	3267718	3286009	453.657	2.47806	0.677627	3.66046	0.000251767	0.00139971	CECR1		desc=Adenosine deaminase CECR1 (Sus scrofa)	GO:0005615,GO:0019239
PMZ_0034732	Abcg3	scaf_01420	4082	21070	262.342	2.42656	0.539931	4.48807	7.19e-06	6.62e-05	Abcg3	ABCG2	desc=ATP-binding cassette sub-family G member 3 (Mus musculus)	GO:0005524,GO:0016020,GO:0016021,GO:0016887,GO:0042626,GO:0055085	GO:0016021
PMZ_0034741	ZP3	scaf_04564	1749	8245	9856.67	5.76951	1.00666	5.70385	1.17e-08	2.54e-07	ZP3	ZP3	desc=Zona pellucida sperm-binding protein 3 (Gallus gallus)		GO:0016021
PMZ_0034743	spg21	scaf_00078	1949480	1971823	502.443	2.13801	0.408852	5.22871	1.71e-07	2.61e-06	spg21	SPG21	desc=Maspardin (Danio rerio)		GO:0005829
PMZ_0034762	UNC5C	scaf_00012	8850106	8906065	473.065	1.5135	0.44588	3.4031	0.000666247	0.00319394	UNC5C	UNC5C	desc=Netrin receptor UNC5C (Gallus gallus)	GO:0005515,GO:0007165	GO:0016021
PMZ_0034780	ZAN	scaf_00008	17780380	17799863	50.1016	3.893	0.803564	4.81818	1.45e-06	1.65e-05	ZAN	ZAN	desc=Zonadhesin (Homo sapiens)		GO:0016021
PMZ_0034785	gatsl1	scaf_00806	8343	13544	63.0418	1.84796	0.557055	3.31397	0.000919828	0.0041933	gatsl1	GATL2	desc=GATS-like protein 1 (Xenopus laevis)
PMZ_0034810	ZAN	scaf_00008	18578459	18593427	42.3583	2.69422	0.86576	3.10155	0.00192509	0.00778736	ZAN	TECTA	desc=Zonadhesin (Sus scrofa)		GO:0031225
PMZ_0034821	Mcoln3	scaf_00183	184681	205521	91.9986	2.26315	0.602861	3.75653	0.000172287	0.00101253	Mcoln3	MCLN3	desc=Mucolipin-3 (Mus musculus)		GO:0005737
PMZ_0034824		scaf_06048	433	3566	1949.42	6.93957	1.15395	5.9127	3.37e-09	8.41e-08
PMZ_0034835	acta1a	scaf_00128	84153	90405	478.601	2.60144	0.847772	3.05334	0.00226312	0.00889179	acta1a	ACT1	desc=Actin%2C alpha skeletal muscle A (Takifugu rubripes)		GO:0005737
PMZ_0034846	PFKFB3	scaf_00042	3716772	3729615	151.787	2.15292	0.655695	3.28032	0.0010369	0.00465061	PFKFB3	F263	desc=6-phosphofructo-2-kinase/fructose-2%2C6-bisphosphatase 3 (Pongo abelii)	GO:0003824,GO:0003873,GO:0005524,GO:0006000,GO:0006003	GO:0003873
PMZ_0034868	Trpv5	scaf_01219	7491	27167	101.674	4.23449	0.978557	4.30199	1.69e-05	0.000139032	Trpv5	TRPV6	desc=Transient receptor potential cation channel subfamily V member 5 (Oryctolagus cuniculus)	GO:0005262,GO:0005515,GO:0006816,GO:0016021	GO:0070062
PMZ_0034881	SLC39A6	scaf_00245	11415	15420	47.6192	2.63173	0.858116	3.06551	0.00217298	0.00860283	SLC39A6		desc=Zinc transporter ZIP6 (Homo sapiens)
PMZ_0034897	Ulk3	scaf_01546	16215	22760	127.287	1.70532	0.508877	3.34867	0.000812007	0.00378255	Ulk3	ULK3	desc=Serine/threonine-protein kinase ULK3 (Mus musculus)	GO:0004672,GO:0005524,GO:0006468,GO:0016772	GO:0034273
PMZ_0034956	Gfer	scaf_00003	21163218	21166798	240.912	2.38673	0.544501	4.3874	1.15e-05	9.89e-05	Gfer		desc=FAD-linked sulfhydryl oxidase ALR (Rattus norvegicus)	GO:0016972,GO:0055114
PMZ_0034970	MTCL1	scaf_00011	6529493	6565021	130.429	2.26607	0.634195	3.57235	0.000353791	0.00186294	MTCL1	MTCL1	desc=Microtubule cross-linking factor 1 (Homo sapiens)	GO:0005615,GO:0010506	GO:0016324
PMZ_0034980	Bmpr1a	scaf_00044	5326751	5347972	101.691	1.65203	0.404711	4.0853	4.4e-05	0.000316703	Bmpr1a		desc=Bone morphogenetic protein receptor type-1A (Rattus norvegicus)	GO:0004672,GO:0004675,GO:0004702,GO:0005524,GO:0006468,GO:0007178,GO:0016020,GO:0016772
PMZ_0034993	Atp6v0a1	scaf_00245	143291	152520	551.133	2.88014	0.561331	5.12698	2.94e-07	4.15e-06	Atp6v0a1		desc=V-type proton ATPase 116 kDa subunit a isoform 1 (Mus musculus)	GO:0015078,GO:0015991,GO:0033179
PMZ_0035015	ZP3	scaf_07631	613	2140	31.7489	5.64713	0.944478	5.75846	8.49e-09	1.9e-07	ZP3	ZP3	desc=Zona pellucida sperm-binding protein 3 (Gallus gallus)		GO:0016021
PMZ_0035031	SEMA3E	scaf_00068	1264518	1289462	114.859	2.60985	0.760817	3.42407	0.000616906	0.0029966	SEMA3E	SEM3E	desc=Semaphorin-3E (Gallus gallus)	GO:0005515	GO:0005576
PMZ_0035043	Tmem132c	scaf_00038	4034787	4058070	125.627	2.54979	0.712352	3.57537	0.000349727	0.00184454	Tmem132c	T132C/T132D	desc=Transmembrane protein 132C (Mus musculus)		GO:0016021
PMZ_0035064	ALOX5	scaf_06055	1274	7474	11123.1	5.60259	0.986758	5.65445	1.56e-08	3.25e-07	ALOX5	LOX5	desc=Arachidonate 5-lipoxygenase (Homo sapiens)	GO:0005506,GO:0016702,GO:0046872,GO:0055114	GO:0005829
PMZ_0035066	TUBB4B	scaf_00114	141736	188561	30181.4	2.29664	0.457483	5.01565	5.29e-07	6.79e-06	TUBB4B		desc=Tubulin beta-4B chain (Fragments) (Mesocricetus auratus)	GO:0003924,GO:0005215,GO:0005525,GO:0006810,GO:0016020,GO:0043234,GO:0051258,GO:0055085
PMZ_0035092		scaf_01550	7888	11137	3159.79	5.42753	1.07046	5.03475	4.78e-07	6.26e-06		ZP2
PMZ_0035123	ZP3	scaf_06933	106	3734	4271.89	7.28725	1.12446	6.39181	1.64e-10	5.93e-09	ZP3	ZP3	desc=Zona pellucida sperm-binding protein 3 (Gallus gallus)		GO:0016021
PMZ_0035143	C18orf8	scaf_00011	6691258	6700789	787.447	2.12776	0.513032	4.14343	3.42e-05	0.000254353	C18orf8	MIC1	desc=Uncharacterized protein C18orf8 (Homo sapiens)		GO:0005765
PMZ_0035159	NSUN5	scaf_00008	3909893	3913051	555.504	1.82629	0.523887	3.4934	0.000476916	0.00240439	NSUN5	NSUN5	desc=Probable 28S rRNA (cytosine-C(5))-methyltransferase (Homo sapiens)	GO:0008168	GO:0005730
PMZ_0035191		scaf_00901	24579	31554	183.156	3.53928	0.6753	5.2423	1.59e-07	2.45e-06
PMZ_0035256	DMBT1	scaf_02885	1272	3505	35245.1	3.92358	1.17148	3.3194	0.000902127	0.00412585	DMBT1	DMBT1	desc=Deleted in malignant brain tumors 1 protein (Homo sapiens)		GO:0005737
PMZ_0035262	DNAJC3	scaf_00702	2109	30035	499.192	1.96787	0.378843	5.19588	2.04e-07	3.04e-06	DNAJC3	DNJC3	desc=DnaJ homolog subfamily C member 3 (Gallus gallus)	GO:0005515	GO:0005737
PMZ_0035265		scaf_00007	505335	539842	293.547	5.62979	1.03574	5.38974	7.06e-08	1.22e-06
PMZ_0035293	TCN1	scaf_00186	13640	30948	5361.91	3.41614	1.06465	3.20536	0.00134895	0.00580118	TCN1	IF/TCO1	desc=Transcobalamin-1 (Homo sapiens)	GO:0015889,GO:0031419	GO:0005576
PMZ_0035313		scaf_00050	7325969	7355961	1085.44	4.85047	0.813898	5.95265	2.64e-09	6.75e-08			Note=Protein of unknown function	GO:0005515
PMZ_0035365	Nt5dc2	scaf_00153	397934	442804	240.221	1.9161	0.560955	3.41681	0.000633603	0.00306162	Nt5dc2	NT5D3	desc=5'-nucleotidase domain-containing protein 2 (Rattus norvegicus)		GO:0005829
PMZ_0035384	ALX4	scaf_00014	4298263	4301638	17.6854	6.16751	1.16066	5.00842	5.49e-07	7.02e-06	ALX4		desc=Homeobox protein aristaless-like 4 (Bos taurus)
PMZ_0035388	Ccnh	scaf_00474	335	14745	280.738	1.79189	0.467992	3.83074	0.000127761	0.000785864	Ccnh	CCNH	desc=Cyclin-H (Mus musculus)	GO:0000079,GO:0006351,GO:0006355,GO:0016538,GO:0019901,GO:0070985	GO:0019907
PMZ_0035400	PRUNE2	scaf_00078	166867	175900	207.54	3.08705	0.446913	6.90599	4.99e-12	2.72e-10	PRUNE2	PRUN2/BNIP2	desc=Protein prune homolog 2 (Pongo abelii)		GO:0005737
PMZ_0035403	PHYH	scaf_04707	2213	10251	104.957	3.82286	0.917266	4.15965	3.19e-05	0.000239604	PHYH	PAHX	desc=Phytanoyl-CoA dioxygenase%2C peroxisomal (Homo sapiens)		GO:0005739
PMZ_0035405	MAP1LC3C	scaf_00041	8035205	8040833	709.389	6.36079	0.987512	6.39313	1.63e-10	5.9e-09	MAP1LC3C		desc=Microtubule-associated proteins 1A/1B light chain 3C (Homo sapiens)	GO:0006914
PMZ_0035412	Acsl1	scaf_01142	6506	13525	408.179	3.16842	0.581324	5.44231	5.26e-08	9.41e-07	Acsl1	ACSL1	desc=Long-chain-fatty-acid--CoA ligase 1 (Mus musculus)	GO:0003824,GO:0008152	GO:0005783
PMZ_0035425	LGALS3	scaf_01536	498	19350	498.444	1.88309	0.418862	4.49634	6.91e-06	6.41e-05	LGALS3	LFG2	desc=Galectin-3 (Canis familiaris)		GO:0030054
PMZ_0035438	Fa2h	scaf_00076	1397788	1401587	559.491	4.41572	0.747356	5.91591	3.3e-09	8.28e-08	Fa2h		desc=Fatty acid 2-hydroxylase (Rattus norvegicus)	GO:0005506,GO:0006633,GO:0016491,GO:0055114
PMZ_0035469	Zfand4	scaf_00044	8970298	8996882	1068.94	2.44601	0.459284	5.32314	1.02e-07	1.68e-06	Zfand4		desc=AN1-type zinc finger protein 4 (Mus musculus)	GO:0008270
PMZ_0035495	anp32b	scaf_00013	15566051	15570606	96.9925	2.09052	0.646287	3.23054	0.00123555	0.00538249	anp32b	AN32A/AN32B	desc=Acidic leucine-rich nuclear phosphoprotein 32 family member B (Xenopus tropicalis)		GO:0005737
PMZ_0035502	TUBB4B	scaf_00410	26404	32653	12053.3	2.96867	0.757813	3.91262	9.13e-05	0.000590622	TUBB4B	TBB4B	desc=Tubulin beta-4B chain (Bos taurus)	GO:0003924,GO:0005200,GO:0005525,GO:0005874,GO:0007017	GO:0005737
PMZ_0035565	GSK3B	scaf_00072	1450085	1451675	165.79	1.45733	0.43306	3.36232	0.000772918	0.00363006	GSK3B		desc=Glycogen synthase kinase-3 beta (Homo sapiens)	GO:0004672,GO:0005524,GO:0006468,GO:0016772
PMZ_0035579	foxi1e	scaf_01067	1252	3001	19.1622	4.03595	1.26602	3.09169	0.00199021	0.00800499	foxi1e		desc=Forkhead box protein I1-ema (Xenopus tropicalis)	GO:0003700,GO:0006355,GO:0043565
PMZ_0035642	ZP4	scaf_04481	5633	12166	5119.52	6.60245	0.9054	7.26897	3.62e-13	2.6e-11	ZP4		desc=Zona pellucida sperm-binding protein 4 (Homo sapiens)
PMZ_0035705		scaf_00092	128807	138217	57.8233	3.66491	0.876202	4.16668	3.09e-05	0.00023315		K1C11	Note=Similar to Keratin%2C type 1 cytoskeletal 11 (Lampetra fluviatilis)	GO:0005198,GO:0005882	GO:0005882
PMZ_0035733	csnk2a1	scaf_00089	930716	939059	5858.31	1.55964	0.34599	4.50734	6.56e-06	6.12e-05	csnk2a1	CSK21	desc=Casein kinase II subunit alpha (Xenopus laevis)	GO:0004672,GO:0005524,GO:0006468,GO:0016772	GO:0005524
PMZ_0035787	Fam120c	scaf_00047	8138148	8148987	1058.19	3.33817	0.823267	4.04464	5.24e-05	0.000366349	Fam120c		desc=Constitutive coactivator of PPAR-gamma-like protein 2 (Mus musculus)
PMZ_0035808	NEK2	scaf_01068	14624	18604	325.136	2.53778	0.541344	4.6821	2.84e-06	2.96e-05	NEK2	NEK2	desc=Serine/threonine-protein kinase Nek2 (Homo sapiens)	GO:0004672,GO:0005524,GO:0006468,GO:0016772	GO:0005813
PMZ_0035816	KCNJ5	scaf_00030	12629366	12634932	216.421	5.28103	0.888784	5.9128	3.36e-09	8.41e-08	KCNJ5		desc=G protein-activated inward rectifier potassium channel 4 (Bos taurus)	GO:0005242,GO:0006813,GO:0016021
PMZ_0035832	taf2	scaf_03574	692	11746	821.402	1.98115	0.39847	4.96865	6.74e-07	8.35e-06	taf2	TAF2	desc=Transcription initiation factor TFIID subunit 2 (Danio rerio)	GO:0008237,GO:0008270	GO:0005634
PMZ_0035834	ALOX5	scaf_06011	775	5764	4350.29	5.96117	0.971606	6.10862	1e-09	2.9e-08	ALOX5	LOX5	desc=Arachidonate 5-lipoxygenase (Homo sapiens)	GO:0005506,GO:0016702,GO:0046872,GO:0055114	GO:0005829
PMZ_0035846	BRSK2	scaf_00064	1730924	1762335	31.1255	2.36178	0.771825	3.05804	0.00222792	0.0087809	BRSK2		desc=Serine/threonine-protein kinase BRSK2 (Homo sapiens)	GO:0004672,GO:0005524,GO:0006468,GO:0016772
PMZ_0035913	ZP4	scaf_10328	1876	3051	5202.81	9.04245	1.64897	5.46589	4.61e-08	8.37e-07	ZP4	ZP4	desc=Zona pellucida sperm-binding protein 4 (Oryctolagus cuniculus)		GO:0005794
PMZ_0035921	tbx5a	scaf_00038	11312180	11323029	140.818	4.1149	0.600084	6.83617	8.13e-12	4.22e-10	tbx5a	TBX5/TBX4	desc=T-box transcription factor TBX5-A (Danio rerio)	GO:0003700,GO:0005634,GO:0006355	GO:0005634
PMZ_0035935	s100a1	scaf_00041	5182662	5196580	6608.13	3.37387	1.0514	3.20864	0.00133365	0.00574416	s100a1		desc=Protein S100-A1 (Misgurnus fossilis)	GO:0005509
PMZ_0035973	Kif26b	scaf_00765	7181	33708	63.1034	2.18635	0.649261	3.36025	0.000778732	0.00365383	Kif26b	KI26B/KI26A	desc=Kinesin-like protein KIF26B (Mus musculus)	GO:0003777,GO:0005524,GO:0005871,GO:0007018,GO:0008017	GO:0005737
PMZ_0035986	ZP4	scaf_04734	3966	12264	10020.4	6.40802	0.907414	7.04183	1.9e-12	1.17e-10	ZP4		desc=Zona pellucida sperm-binding protein 4 (Bos taurus)
PMZ_0036020	KIF2A	scaf_05176	2758	10009	292.026	4.96467	0.591875	8.35525	6.53e-17	1.01e-14	KIF2A		desc=Kinesin-like protein KIF2A (Gallus gallus)	GO:0003777,GO:0005524,GO:0005871,GO:0007018,GO:0008017
PMZ_0036034	HYKK	scaf_00208	213154	220079	187.412	2.03127	0.538368	3.77387	0.000160737	0.000953671	HYKK	HYKK	desc=Hydroxylysine kinase (Homo sapiens)	GO:0016772	GO:0005737
PMZ_0036050		scaf_08292	4381	5889	9204.5	5.64332	1.14257	4.87996	1.06e-06	1.25e-05
PMZ_0036088	Slc25a44	scaf_00060	4399822	4415698	293.296	1.76435	0.499489	3.53187	0.000412638	0.00212275	Slc25a44	S2544	desc=Solute carrier family 25 member 44 (Mus musculus)		GO:0016021
PMZ_0036098	CAPN5	scaf_00128	154455	171671	323.456	5.64542	0.617832	9.10625	8.53e-20	2e-17	CAPN5	CAN5	desc=Calpain-5 (Homo sapiens)	GO:0004198,GO:0005622,GO:0006508,GO:0051493	GO:0009986
PMZ_0036123	ZP4	scaf_07590	1519	7821	1477.72	5.02128	0.915147	5.47843	4.29e-08	7.86e-07	ZP4	ZP4	desc=Zona pellucida sperm-binding protein 4 (Bos taurus)		GO:0016021
PMZ_0036155	TRIM71	scaf_00059	1930144	1948566	206.956	4.19736	0.406479	10.3174	5.88e-25	3.57e-22	TRIM71	LIN41	desc=E3 ubiquitin-protein ligase TRIM71 (Homo sapiens)	GO:0005515	GO:0000932
PMZ_0036167	OR3A2	scaf_00051	233379	233693	25.3272	6.28045	0.988629	5.97719	2.27e-09	5.99e-08	OR3A2	OR7C1	desc=Olfactory receptor 3A2 (Gorilla gorilla gorilla)	GO:0004930,GO:0007186,GO:0016021	GO:0016021
PMZ_0036172	Huwe1	scaf_00301	35074	94628	25463.6	4.69307	0.575117	8.16266	3.28e-16	4.33e-14	Huwe1	NT5D2/HUWE1	desc=E3 ubiquitin-protein ligase HUWE1 (Mus musculus)		GO:0005737
PMZ_0036174	USH2A	scaf_02900	680	15950	35.9847	1.89897	0.504575	3.75901	0.00017059	0.00100416	USH2A	USH2A	desc=Usherin (Homo sapiens)	GO:0003777,GO:0005515,GO:0005524,GO:0005871,GO:0007018,GO:0008017	GO:0016324
PMZ_0036195	LIG1	scaf_00037	11772440	11780566	837.951	2.37198	0.743918	3.17613	0.00149252	0.00632325	LIG1	DNLI1	desc=DNA ligase 1 (Homo sapiens)	GO:0003677,GO:0003910,GO:0006281,GO:0006310	GO:0005634
PMZ_0036205	Slc4a3	scaf_01720	3335	11891	56.72	2.28582	0.698228	3.26947	0.00107748	0.00480706	Slc4a3	B3A2	desc=Anion exchange protein 3 (Mus musculus)	GO:0005215,GO:0005452,GO:0006810,GO:0006820,GO:0008509,GO:0016020,GO:0016021	GO:0016323
PMZ_0036216	Slc7a8	scaf_00020	13131370	13176623	557.182	1.55278	0.507259	3.06549	0.00217312	0.00860283	Slc7a8	LAT2	desc=Large neutral amino acids transporter small subunit 2 (Rattus norvegicus)	GO:0003333,GO:0015171,GO:0016020	GO:0016323
PMZ_0036231	TMEM19	scaf_02499	16751	20129	65.6742	2.69105	0.739505	3.63696	0.000275875	0.00151082	TMEM19	TMM19	desc=Transmembrane protein 19 (Homo sapiens)	GO:0016021	GO:0016021
PMZ_0036286		scaf_00126	502114	502605	9690.13	5.12434	1.14735	4.4176	9.98e-06	8.76e-05	zgc:113413	TTL	desc=Natterin-like protein (Danio rerio)
PMZ_0036287	zgc:113413	scaf_00126	495814	496644	2595.7	4.91395	1.17436	4.13699	3.52e-05	0.000260459	zgc:113413	TTL	desc=Natterin-like protein (Danio rerio)
PMZ_0036365	alg11	scaf_02413	13747	18626	156.11	2.35922	0.512036	4.60484	4.13e-06	4.11e-05	alg11	ALG11	desc=GDP-Man:Man(3)GlcNAc(2)-PP-Dol alpha-1%2C2-mannosyltransferase (Danio rerio)	GO:0009058	GO:0005789
PMZ_0036373	Capn5	scaf_00128	188096	205764	528.169	6.39769	0.68878	9.25682	2.11e-20	5.6e-18	Capn5	CAN5	desc=Calpain-5 (Mus musculus)	GO:0005515	GO:0009986
PMZ_0036375	Rbmx2	scaf_00090	55879	67024	253.76	1.69391	0.550092	3.08046	0.0020668	0.00824218	Rbmx2	RBMX2	desc=RNA-binding motif protein%2C X-linked 2 (Rattus norvegicus)	GO:0000166,GO:0003676	GO:0000166
PMZ_0036383	TRAF2	scaf_00179	11246	28649	227.913	1.55027	0.331247	4.68065	2.86e-06	2.98e-05	TRAF2	TRAF2	desc=TNF receptor-associated factor 2 (Homo sapiens)	GO:0004842,GO:0005515,GO:0007250,GO:0008270,GO:0016567,GO:0033209,GO:0042981,GO:0046328,GO:0051865	GO:0035631
PMZ_0036390	Nmur2	scaf_02426	4959	5800	30.2604	5.44868	1.26663	4.16222	3.15e-05	0.000237288	Nmur2	NMUR2	desc=Neuromedin-U receptor 2 (Mus musculus)		GO:0016021
PMZ_0036403	DOLPP1	scaf_00164	3567	16708	152.036	2.49476	0.591593	4.21731	2.47e-05	0.000193105	DOLPP1	DOPP1	desc=Dolichyldiphosphatase 1 (Rhinolophus ferrumequinum)	GO:0003824,GO:0016020	GO:0030176
PMZ_0036440	Plg	scaf_00017	6089184	6098553	74.3729	4.11702	1.04926	3.8924	9.93e-05	0.000633813	Plg	CEL2A	desc=Plasminogen (Mus musculus)	GO:0004252,GO:0006508	GO:0005576
PMZ_0036499		scaf_00810	18772	23805	366.475	1.8873	0.395996	4.76655	1.87e-06	2.06e-05		AP5M1			GO:0030119
PMZ_0036502	lap3	scaf_06926	3457	6494	482.095	1.47787	0.439237	3.36755	0.000758389	0.0035774	lap3	AMPL	desc=Cytosol aminopeptidase (Xenopus tropicalis)	GO:0004177,GO:0005622,GO:0005737,GO:0006508,GO:0008235,GO:0019538,GO:0030145	GO:0005737
PMZ_0036521	RAB27A	scaf_02035	2159	8378	26.6795	4.96049	1.03101	4.6746	2.95e-06	3.05e-05	RAB27A		desc=Ras-related protein Rab-27A (Sus scrofa)	GO:0005525,GO:0007165,GO:0007264,GO:0015031,GO:0016020
PMZ_0036522	ZP3	scaf_06153	3192	7603	2640.57	6.21096	1.01912	6.05664	1.39e-09	3.86e-08	ZP3	ZP3	desc=Zona pellucida sperm-binding protein 3 (Gallus gallus)		GO:0016021
PMZ_0036543	DMBT1	scaf_00619	1802	4033	2222.57	3.48991	1.03752	3.36258	0.000772175	0.0036289	DMBT1	DMBT1	desc=Deleted in malignant brain tumors 1 protein (Homo sapiens)		GO:0005737
PMZ_0036607		scaf_03880	3	5648	183.803	4.40938	1.02187	4.29246	1.77e-05	0.000144522		MEX3D		GO:0003676,GO:0003723	GO:0005634
PMZ_0036621	DMBT1	scaf_04784	5972	8200	1899.9	4.79923	0.994186	4.81198	1.49e-06	1.69e-05	DMBT1	DMBT1	desc=Deleted in malignant brain tumors 1 protein (Homo sapiens)		GO:0005737
PMZ_0036646	SIK3	scaf_06652	6705	9147	31.3804	2.43129	0.74328	3.26091	0.00111057	0.00491806	SIK3	SIK3	desc=Serine/threonine-protein kinase SIK3 (Homo sapiens)		GO:0005524
PMZ_0036657	SLC8A3	scaf_02446	15514	17300	25.8191	4.60713	1.02813	4.3789	1.19e-05	0.000102317	SLC8A3	C3	desc=Sodium/calcium exchanger 3 (Homo sapiens)	GO:0007154,GO:0016021	GO:0043197
PMZ_0036694	ints12	scaf_05081	4393	12233	146.883	3.04697	0.67238	4.52964	5.91e-06	5.58e-05	ints12		desc=Integrator complex subunit 12 (Xenopus laevis)	GO:0005515,GO:0008270
PMZ_0036704	KLHL2	scaf_01495	5925	22202	257.408	1.49078	0.479892	3.10339	0.00191319	0.00775535	KLHL2	KLHL2/KLHL3	desc=Kelch-like protein 2 (Homo sapiens)	GO:0005515	GO:0031463
PMZ_0036739	SLC38A11	scaf_03138	521	8823	409.705	2.10664	0.592316	3.54918	0.000386436	0.00200978	SLC38A11	S38AB	desc=Putative sodium-coupled neutral amino acid transporter 11 (Bos taurus)		GO:0016021
PMZ_0036742	ZP3	scaf_00090	149305	151422	27507.1	5.88497	1.1681	4.97263	6.61e-07	8.2e-06	ZP3	ZP3	desc=Zona pellucida sperm-binding protein 3 (Gallus gallus)		GO:0016021
PMZ_0036747	Grik1	scaf_00054	4849503	4907813	163.342	4.2921	0.539767	7.93956	2.03e-15	2.19e-13	Grik1		desc=Glutamate receptor ionotropic%2C kainate 1 (Mus musculus)	GO:0004970,GO:0005234,GO:0016020
PMZ_0036771	RAPSN	scaf_00002	13724494	13733671	35.7519	2.42995	0.776403	3.13141	0.00173968	0.00716718	RAPSN	RAPSN	desc=43 kDa receptor-associated protein of the synapse (Gallus gallus)	GO:0005515,GO:0007268,GO:0008270,GO:0033130,GO:0043495,GO:0045202	GO:0030054
PMZ_0036819	ZP4	scaf_07532	1559	7183	719.801	6.4726	1.00595	6.37568	1.82e-10	6.47e-09	ZP4		desc=Zona pellucida sperm-binding protein 4 (Oryctolagus cuniculus)
PMZ_0036831	alg11	scaf_00062	2297748	2305580	171.342	2.13847	0.461098	4.63566	3.56e-06	3.62e-05	alg11	ALG11	desc=GDP-Man:Man(3)GlcNAc(2)-PP-Dol alpha-1%2C2-mannosyltransferase (Danio rerio)	GO:0009058	GO:0005789
PMZ_0036875	Bloc1s6	scaf_00062	4602128	4615551	98.5958	1.94016	0.60144	3.2275	0.00124875	0.0054327	Bloc1s6	BL1S6	desc=Biogenesis of lysosome-related organelles complex 1 subunit 6 (Mus musculus)		GO:0031083
PMZ_0036878	ASF1A	scaf_01020	7144	14200	403.885	2.41924	0.688778	3.5095	0.000448951	0.00228235	ASF1A	ASF1	desc=Histone chaperone ASF1A (Bos taurus)	GO:0005634,GO:0006333	GO:0005634
PMZ_0036950	ZP2	scaf_08922	880	2776	10760.5	4.79424	1.03495	4.61021	4.02e-06	4.02e-05	ZP2		desc=Zona pellucida sperm-binding protein 2 (Canis familiaris)
PMZ_0037021		scaf_00060	2736682	2744490	1225.55	5.76284	1.39132	4.00087	6.31e-05	0.000428484				GO:0030176,GO:0061024
PMZ_0037044		scaf_00072	3029980	3038958	188.748	4.87207	0.91631	5.29533	1.19e-07	1.91e-06
PMZ_0037049	RAB27A	scaf_00364	1141	8143	342.305	3.72778	0.622728	5.98081	2.22e-09	5.88e-08	RAB27A		desc=Ras-related protein Rab-27A (Sus scrofa)	GO:0003924,GO:0005525,GO:0005622,GO:0006886,GO:0006913,GO:0007165,GO:0007264,GO:0015031,GO:0016020
PMZ_0037059	RAB3C	scaf_00062	2492842	2501885	16.6307	6.18038	1.14256	5.08025	3.77e-07	5.09e-06	RAB3C	RAB3C	desc=Ras-related protein Rab-3C (Bos taurus)	GO:0005525,GO:0007264,GO:0015031	GO:0005829
PMZ_0037091		scaf_00257	109288	120030	84.9682	4.23879	1.08187	3.89035	0.000100102	0.000638393		MTHR		GO:0004489,GO:0006555,GO:0055114	GO:0005829
PMZ_0037158	Ppfia4	scaf_01072	1072	8200	22.093	3.46939	1.00635	3.41386	0.000640492	0.0030903	Ppfia4	LIPA2/LIPA4	desc=Liprin-alpha-4 (Fragment) (Rattus norvegicus)		GO:0009986
PMZ_0037173	NALCN	scaf_03934	8196	12083	6.68595	4.71668	1.48213	3.11696	0.00182729	0.00746323	NALCN		desc=Sodium leak channel non-selective protein (Homo sapiens)	GO:0005216,GO:0005261,GO:0006811,GO:0016020,GO:0055085
PMZ_0037194	LSG1	scaf_04091	3366	3668	66.2801	2.04092	0.485724	4.19667	2.71e-05	0.000209043	LSG1		desc=Large subunit GTPase 1 homolog (Gallus gallus)
PMZ_0037233	Rnf103	scaf_03396	5453	7953	303.42	3.91738	0.683885	5.71562	1.09e-08	2.38e-07	Rnf103	RN103	desc=E3 ubiquitin-protein ligase RNF103 (Rattus norvegicus)	GO:0005515,GO:0008270	GO:0005783
PMZ_0037276	PIWIL2	scaf_03516	3308	12726	90.1324	2.5354	0.583886	4.33511	1.46e-05	0.000121667	PIWIL2	PIWL2	desc=Piwi-like protein 2 (Homo sapiens)		GO:0033391
PMZ_0037286	73	scaf_00472	2466	15869	324.844	1.65424	0.486223	3.40359	0.000665067	0.00319065	Similar to activity-dependent neuroprotector homeobox protein-like		desc=Transcriptional regulator ICP22 homolog (Saimiriine herpesvirus 2 (strain 11))	GO:0046872
PMZ_0037315		scaf_00903	15574	20243	36.6882	3.17707	0.735794	4.30552	1.67e-05	0.000137241		FOXH1			GO:0005634
PMZ_0037320	STK17A	scaf_00004	1261311	1286378	178.967	2.28199	0.498496	4.57985	4.65e-06	4.55e-05	STK17A	ST17A	desc=Serine/threonine-protein kinase 17A (Homo sapiens)	GO:0004672,GO:0005524,GO:0006468,GO:0016772	GO:0005634
PMZ_0037345	CREB5	scaf_00162	263636	269445	35.4645	2.61545	0.6907	3.77992	0.000156878	0.000934773	CREB5	CREB5	desc=Cyclic AMP-responsive element-binding protein 5 (Homo sapiens)	GO:0003700,GO:0006355,GO:0043565	GO:0070062
PMZ_0037351	Stk17b	scaf_00004	1247033	1257359	80.4337	3.00211	0.659759	4.54589	5.47e-06	5.22e-05	Stk17b	ST17B	desc=Serine/threonine-protein kinase 17B (Rattus norvegicus)	GO:0004672,GO:0005524,GO:0006468,GO:0016772	GO:0015629
PMZ_0037354	TRIM59	scaf_06479	1076	3188	38.5662	5.04679	1.07972	4.57197	4.83e-06	4.69e-05	TRIM59	TRI59	desc=Tripartite motif-containing protein 59 (Gallus gallus)	GO:0005515,GO:0005622,GO:0008270	GO:0016021
PMZ_0037371	Pkn	scaf_03901	11214	15226	136.955	1.59545	0.509824	3.13106	0.00174179	0.00717335	Pkn		desc=Serine/threonine-protein kinase N (Drosophila melanogaster)	GO:0004672,GO:0005524,GO:0006468,GO:0016772
PMZ_0037380	sil1	scaf_00037	10022146	10030887	229.642	4.21289	0.604179	6.96479	3.29e-12	1.9e-10	sil1	SIL1	desc=Nucleotide exchange factor SIL1 (Xenopus laevis)		GO:0005788
PMZ_0037419	stm	scaf_00007	774477	792306	92.9134	2.66217	0.676008	3.92353	8.73e-05	0.000568434	stm		desc=Protein starmaker (Danio rerio)
PMZ_0037452	GABRG2	scaf_00010	1161695	1166681	24.7308	3.68129	0.861334	4.2337	2.3e-05	0.000181374	GABRG2	GBRG2	desc=Gamma-aminobutyric acid receptor subunit gamma-2 (Bos taurus)	GO:0005230,GO:0006810,GO:0006811,GO:0016020,GO:0016021	GO:0030424
PMZ_0037468	ARCN1	scaf_08014	1	6261	152.62	2.0145	0.64755	3.11053	0.00186753	0.00759724	ARCN1		desc=Coatomer subunit delta (Gallus gallus)	GO:0006810,GO:0006890,GO:0030126
PMZ_0037484	CLDN9	scaf_00058	812292	816772	171.821	3.60306	0.584406	6.16765	6.93e-10	2.12e-08	CLDN9		desc=Claudin-9 (Homo sapiens)	GO:0005198,GO:0005923,GO:0016021
PMZ_0037503		scaf_06147	2215	5862	51.5269	2.20734	0.698998	3.15048	0.00163003	0.0067889			Note=Protein of unknown function
PMZ_0037513	Cuzd1	scaf_10608	2459	3789	705.621	4.7086	0.968478	4.84881	1.24e-06	1.43e-05	Cuzd1	DMBT1	desc=CUB and zona pellucida-like domain-containing protein 1 (Rattus norvegicus)		GO:0005737
PMZ_0037523	ARCN1	scaf_06913	2	3678	341.341	2.45183	0.620486	3.94955	7.83e-05	0.00051751	ARCN1	COPD	desc=Coatomer subunit delta (Gallus gallus)	GO:0006810,GO:0006890,GO:0030126	GO:0030131
PMZ_0037527	infB	scaf_00078	1122161	1132897	76.1207	2.92099	0.519714	5.61568	1.96e-08	3.93e-07	infB	ZBT7A	desc=Translation initiation factor IF-2 (Mycobacterium marinum (strain ATCC BAA-535 / M))	GO:0005515	GO:0005634
PMZ_0037648	TMEM68	scaf_00040	9498918	9507550	98.4759	1.90346	0.615888	3.09337	0.00197897	0.00796879	TMEM68	TMM68	desc=Transmembrane protein 68 (Homo sapiens)		GO:0016021
PMZ_0037655	foxg1	scaf_00036	7473003	7481202	98.6021	5.83232	0.743305	7.73001	1.08e-14	1e-12	foxg1	FOXG1	desc=Forkhead box protein G1 (Xenopus laevis)	GO:0003700,GO:0006355,GO:0043565	GO:0005634
PMZ_0037665	OR52P1P	scaf_01644	10787	22959	116.913	5.12732	0.822663	6.18567	6.18e-10	1.92e-08	OR52P1P	O52P1	desc=Putative olfactory receptor 52P1 (Homo sapiens)	GO:0004930,GO:0007186,GO:0016021	GO:0016021
PMZ_0037677	Zp1	scaf_11252	318	1916	1815.99	4.91303	0.978417	5.00672	5.54e-07	7.06e-06	Zp1	ZP1	desc=Zona pellucida sperm-binding protein 1 (Mus musculus)		GO:0016021
PMZ_0037679	INTS7	scaf_06587	1725	4726	48.4038	2.02013	0.66753	3.02171	0.00251349	0.00968932	INTS7	INT7	desc=Integrator complex subunit 7 (Gallus gallus)		GO:0005694
PMZ_0037703	Usp15	scaf_01187	24306	28737	2491.4	2.91946	0.735816	3.96352	7.39e-05	0.000491639	Usp15	UBP4	desc=Ubiquitin carboxyl-terminal hydrolase 15 (Rattus norvegicus)	GO:0006511,GO:0016579,GO:0036459	GO:0005737
PMZ_0037729	PPP6C	scaf_00034	5299019	5318003	991.793	1.74734	0.47286	3.69492	0.000219953	0.00124674	PPP6C	PPP6	desc=Serine/threonine-protein phosphatase 6 catalytic subunit (Homo sapiens)	GO:0016787	GO:0005829
PMZ_0037771	RAE1	scaf_04343	11067	13772	54.7525	2.2494	0.583859	3.84935	0.000118432	0.000738062	RAE1	RAEL1/RAE1L	desc=mRNA export factor (Homo sapiens)	GO:0005515	GO:0005737
PMZ_0037831	PRDM13	scaf_00046	4303203	4308487	129.035	2.02731	0.496301	4.08503	4.41e-05	0.000316931	PRDM13		desc=PR domain zinc finger protein 13 (Homo sapiens)	GO:0003676,GO:0046872
PMZ_0037939	Alox12b	scaf_09454	1709	3682	1187.46	6.42647	0.95408	6.69967	2.09e-11	9.59e-10	Alox12b		desc=Arachidonate 12-lipoxygenase%2C 12R-type (Mus musculus)	GO:0005506,GO:0005515,GO:0016702,GO:0046872,GO:0055114
PMZ_0037979	KCND3	scaf_00022	2353094	2353660	17.2167	4.14503	1.11162	3.63121	0.000282097	0.00153882	KCND3		desc=Potassium voltage-gated channel subfamily D member 3 (Homo sapiens)	GO:0005249,GO:0005515,GO:0006813,GO:0008076,GO:0051260
PMZ_0037980	KCND2	scaf_00022	2352546	2353031	15.6072	3.87132	1.13836	3.32536	0.000883032	0.00405314	KCND2		desc=Potassium voltage-gated channel subfamily D member 2 (Homo sapiens)	GO:0005249,GO:0006813,GO:0008076
PMZ_0038014	FZD1	scaf_00053	6569935	6571459	146.106	3.08441	0.844372	3.65541	0.000256775	0.00142348	FZD1	FZD1	desc=Frizzled-1 (Gallus gallus)	GO:0004888,GO:0007166,GO:0016020,GO:0016055,GO:0042813	GO:0016021
PMZ_0038087	SHOX	scaf_00001	18893461	18906554	12.5065	3.6553	1.15045	3.11036	0.00186859	0.00759995	SHOX	SHOX	desc=Short stature homeobox protein (Homo sapiens)	GO:0003677	GO:0005634
PMZ_0038106	Camk1	scaf_00065	1829387	1839969	52.6242	2.69055	0.641776	4.18942	2.8e-05	0.000215154	Camk1		desc=Calcium/calmodulin-dependent protein kinase type 1 (Rattus norvegicus)	GO:0004672,GO:0005524,GO:0006468,GO:0016772
PMZ_0038121	CTNNBL1	scaf_01009	26743	31343	74.7766	1.89142	0.564264	3.34924	0.000810334	0.00377566	CTNNBL1	CTBL1	desc=Beta-catenin-like protein 1 (Bos taurus)		GO:0005634
PMZ_0038129	CCNJ	scaf_01342	14275	20739	364.935	4.28096	0.516154	8.28874	1.14e-16	1.67e-14	CCNJ	CCNJ	desc=Cyclin-J (Homo sapiens)		GO:0005634
PMZ_0038136	Nkx2	scaf_00018	398919	404079	41.0641	2.6024	0.821333	3.16425	0.00155484	0.00653031	Nkx2	NKX23/NKX26	desc=Homeobox protein Nkx-2.3 (Mus musculus)	GO:0003677,GO:0006355,GO:0043565	GO:0005634
PMZ_0038176	Tm7sf3	scaf_08218	4642	5447	79.8981	4.83412	0.723583	6.63677	3.21e-11	1.41e-09	Tm7sf3	TM7S3	desc=Transmembrane 7 superfamily member 3 (Mus musculus)		GO:0070062
PMZ_0038212	ARCN1	scaf_00072	906824	913499	558.107	2.01542	0.529394	3.80666	0.000140857	0.000853712	ARCN1		desc=Coatomer subunit delta (Homo sapiens)	GO:0005515,GO:0006886,GO:0006890,GO:0016192,GO:0030126,GO:0030131
PMZ_0038234	COL4A3	scaf_05867	2	5905	935.345	2.38798	0.342803	6.96678	3.24e-12	1.88e-10	COL4A3	YTHD2/YTHD1	desc=Collagen alpha-3(IV) chain (Homo sapiens)		GO:1990247
PMZ_0038264	Ip6k3	scaf_00888	27328	30539	104.731	2.60187	0.59408	4.38799	1.14e-05	9.87e-05	Ip6k3		desc=Inositol hexakisphosphate kinase 3 (Mus musculus)	GO:0008440
PMZ_0038422	CAMK1D	scaf_00065	1807247	1812559	36.8712	2.55349	0.744658	3.42841	0.000607128	0.00295724	CAMK1D		desc=Calcium/calmodulin-dependent protein kinase type 1D (Homo sapiens)	GO:0004672,GO:0005524,GO:0006468,GO:0016772
PMZ_0038434	ZP4	scaf_10328	1876	3051	3623.82	4.98381	1.17775	4.18206	2.89e-05	0.000220752	ZP4	ZP4	desc=Zona pellucida sperm-binding protein 4 (Oryctolagus cuniculus)		GO:0005794
PMZ_0038458		scaf_09618	507	3432	69.8364	1.42307	0.467384	3.04492	0.00232742	0.00909477
PMZ_0038557	tmem229b	scaf_00041	10642649	10643670	18.8422	2.75801	0.712256	3.84875	0.000118724	0.000739406	tmem229b		desc=Transmembrane protein 229b (Danio rerio)
PMZ_0038560	Tasp1	scaf_03007	9463	9957	422.461	2.14984	0.456101	4.7121	2.45e-06	2.6e-05	Tasp1	TASP1	desc=Threonine aspartase 1 (Mus musculus)	GO:0016787	GO:0004298
PMZ_0038640	MYBPC1	scaf_00111	750723	751676	32.6392	2.38171	0.610206	3.90125	9.57e-05	0.000615125	MYBPC1	MYPC1	desc=Myosin-binding protein C%2C slow-type (Homo sapiens)		GO:0005829
PMZ_0038652	BAZ1A	scaf_00009	5977497	5980313	84.945	2.47807	0.508451	4.8685	1.12e-06	1.31e-05	BAZ1A		desc=Bromodomain adjacent to zinc finger domain protein 1A (Homo sapiens)
PMZ_0038733	Artn	scaf_00002	1185539	1196554	366.787	4.03127	0.644953	6.25679	3.93e-10	1.29e-08	Artn	ARTN	desc=Artemin (Rattus norvegicus)	GO:0008083	GO:0005615
PMZ_0038743	MYBPC1	scaf_00111	693094	747345	52.497	2.78453	0.597621	4.65341	3.26e-06	3.36e-05	MYBPC1	MYPC1	desc=Myosin-binding protein C%2C slow-type (Homo sapiens)		GO:0005829
PMZ_0038778	Samd5	scaf_00058	912719	916814	23.993	2.96251	0.949612	3.10437	0.00190686	0.00773294	Samd5		desc=Sterile alpha motif domain-containing protein 5 (Mus musculus)	GO:0005515
PMZ_0038782		scaf_00053	4041802	4049487	134.39	1.36442	0.350483	3.89299	9.9e-05	0.000632914		SDHF3		GO:0005739	GO:0005739
PMZ_0038795	CACNG2	scaf_00071	2438771	2450899	11.0759	4.11565	1.17718	3.3703	0.000750863	0.00354793	CACNG2	CCG2	desc=Voltage-dependent calcium channel gamma-2 subunit (Homo sapiens)	GO:0006816,GO:0016020,GO:0016021	GO:0032281
PMZ_0038807	Btg1	scaf_00042	3925536	3926278	848.914	1.56651	0.421019	3.7194	0.000199698	0.00114835	Btg1	BTG1	desc=Protein BTG1 (Rattus norvegicus)		GO:0005737
PMZ_0038835	Tm7sf3	scaf_00936	4373	26926	2379.43	4.33897	0.567573	7.64744	2.05e-14	1.84e-12	Tm7sf3		desc=Transmembrane 7 superfamily member 3 (Rattus norvegicus)
PMZ_0038844		scaf_00093	1132385	1143445	1653.44	4.05494	0.763893	5.31628	1.06e-07	1.73e-06
PMZ_0038909	KCNH5	scaf_02717	2064	5648	63.0812	1.82845	0.592164	3.08545	0.00203243	0.00814022	KCNH5	KCNH5	desc=Potassium voltage-gated channel subfamily H member 5 (Homo sapiens)	GO:0005216,GO:0005249,GO:0005887,GO:0006811,GO:0006813,GO:0008076,GO:0016020,GO:0042391,GO:0055085,GO:0071805	GO:0009986
PMZ_0038934	INF2	scaf_01508	13877	14302	20.637	3.72944	1.02798	3.58189	0.000341124	0.00180603	INF2	INF2	desc=Inverted formin-2 (Homo sapiens)	GO:0003779,GO:0005488,GO:0017048,GO:0030036	GO:0005737
PMZ_0038935	WNT11	scaf_03785	14225	14990	180.798	4.55415	0.809547	5.60939	2.03e-08	4.05e-07	WNT11	WNT11	desc=Protein Wnt-11 (Gallus gallus)	GO:0005102,GO:0005576,GO:0007275,GO:0016055	GO:0005737
PMZ_0039019	Os05g0155500	scaf_00054	1081369	1113260	350.163	2.26842	0.610773	3.71324	0.000204626	0.00117183	Os05g0155500		desc=Importin subunit alpha-1b (Oryza sativa subsp. japonica)	GO:0005488,GO:0005515
PMZ_0039056		scaf_05407	3691	8393	149.525	2.66072	0.576353	4.61234	3.98e-06	3.98e-05		ZFAT		GO:0003676,GO:0046872	GO:0005829
PMZ_0039122	US11	scaf_00990	25317	32136	42.1276	3.16701	1.03363	3.051	0.00228077	0.00894661	US11	NUPL/BAG	desc=RNA-binding protein (Human herpesvirus 1 (strain 17))	GO:0003676	GO:0005618
PMZ_0039143	RETN	scaf_00011	4707883	4708782	24.9418	5.1168	1.18875	4.14214	3.44e-05	0.00025569	RETN	RETN	desc=Resistin (Bos taurus)	GO:0005179,GO:0005576	GO:0005615
PMZ_0039168	MESDC1	scaf_00091	870048	871290	129.333	2.01875	0.572378	3.52833	0.000418194	0.00214451	MESDC1	MESD1	desc=Mesoderm development candidate 1 (Homo sapiens)
PMZ_0039217	BTG3	scaf_00174	178089	182017	1210.71	7.10728	1.07363	6.55576	5.54e-11	2.3e-09	BTG3		desc=Protein BTG3 (Homo sapiens)
PMZ_0039255	FOXA1	scaf_00047	1646371	1647195	10.8275	4.77357	1.11442	4.09363	4.25e-05	0.000306659	FOXA1		desc=Hepatocyte nuclear factor 3-alpha (Homo sapiens)	GO:0003700,GO:0006355,GO:0043565
PMZ_0039291	nrarpb	scaf_02682	8632	8985	14.0414	4.37702	1.11241	3.80374	0.000142529	0.000861962	nrarpb	NRARP	desc=Notch-regulated ankyrin repeat-containing protein B (Danio rerio)	GO:0005515	GO:0007275
PMZ_0039403	SOX21	scaf_00008	18677883	18678641	12.4362	3.81906	1.15366	3.22064	0.00127904	0.00554586	SOX21	SOX14	desc=Transcription factor SOX-21 (Homo sapiens)	GO:0006355	GO:0005634
PMZ_0039414	CRK	scaf_00893	30223	30873	27.3119	2.08204	0.513143	4.04751	5.18e-05	0.000362882	CRK		desc=Adapter molecule crk (Homo sapiens)
PMZ_0039418	P2RY1	scaf_00051	648571	649695	631.523	3.71179	0.610665	6.09411	1.1e-09	3.14e-08	P2RY1	P2RY1	desc=P2Y purinoceptor 1 (Meleagris gallopavo)	GO:0004930,GO:0007186,GO:0007200,GO:0016021,GO:0030168,GO:0045028,GO:0090075	GO:0016021
PMZ_0040002	RBM24	scaf_00003	995352	997691	183.885	2.91201	0.410306	7.09565	1.29e-12	8.25e-11	RBM24		desc=RNA-binding protein 24 (Homo sapiens)
PMZ_0040003	rbm38	scaf_00003	1014568	1019035	230.306	3.69575	0.562422	6.56546	5.19e-11	2.17e-09	rbm38	RBM38	desc=RNA-binding protein 38 (Xenopus tropicalis)	GO:0000166,GO:0003676	GO:0005829
PMZ_0040005	ID4	scaf_00003	1136535	1137128	112.675	3.34357	0.897791	3.72726	0.000193572	0.00111809	ID4	ID4	desc=DNA-binding protein inhibitor ID-4 (Homo sapiens)	GO:0005634,GO:0005737,GO:0045892,GO:0046983	GO:0005737
PMZ_0040010	CYP7B1	scaf_00003	2022990	2027024	370.585	2.60511	0.569662	4.58052	4.64e-06	4.53e-05	CYP7B1	CP7B1	desc=25-hydroxycholesterol 7-alpha-hydroxylase (Homo sapiens)	GO:0004497,GO:0005506,GO:0016705,GO:0020037,GO:0055114	GO:0005789
PMZ_0040032	Tmtc3	scaf_00003	4607200	4654414	4549.74	4.42958	0.687306	6.44739	1.14e-10	4.3e-09	Tmtc3	TMTC3	desc=Transmembrane and TPR repeat-containing protein 3 (Mus musculus)	GO:0004190,GO:0005515,GO:0006508	GO:0016021
PMZ_0040042	Eps8	scaf_00003	6085022	6100351	98.2543	3.80141	0.973062	3.89282	9.91e-05	0.000633144	Eps8	EPS8	desc=Epidermal growth factor receptor kinase substrate 8 (Rattus norvegicus)	GO:0005515	GO:0005938
PMZ_0040044	PTRHD1	scaf_00003	6421748	6424178	352.6	1.9381	0.559208	3.46497	0.000530293	0.00262939	PTRHD1	PTRD1	desc=Putative peptidyl-tRNA hydrolase PTRHD1 (Bos taurus)	GO:0004045	GO:0070062
PMZ_0040046	CYTH2	scaf_00003	6460980	6495957	559.454	1.94958	0.480008	4.06538	4.8e-05	0.000339718	CYTH2	CYH1	desc=Cytohesin-2 (Chlorocebus aethiops)	GO:0005086,GO:0032012	GO:0005737
PMZ_0040048		scaf_00003	6734295	6740819	516.687	2.3394	0.730919	3.1894	0.0014257	0.00608364
PMZ_0040054	AXIN1	scaf_00003	7251537	7268032	180.834	2.58551	0.644225	4.01371	5.98e-05	0.00040854	AXIN1	AXIN1/AXNR	desc=Axin-1 (Homo sapiens)	GO:0007165,GO:0030159,GO:0030877,GO:0038032	GO:0016023
PMZ_0040056	TSC2	scaf_00003	7285446	7310600	671.347	3.86855	0.469073	8.24532	1.65e-16	2.34e-14	TSC2	TSC2	desc=Tuberin (Homo sapiens)	GO:0005096,GO:0005488,GO:0032007,GO:0033596,GO:0043547	GO:0005901
PMZ_0040057	Dlgap3	scaf_00003	7477549	7480078	20.7846	3.57083	1.13762	3.08378	0.00204392	0.0081761	Dlgap3	DLGP4	desc=Disks large-associated protein 3 (Rattus norvegicus)	GO:0007268,GO:0023052,GO:0045202	GO:0030425
PMZ_0040062	Slc30a2	scaf_00003	7630312	7649611	1312.34	4.6577	0.612574	7.60282	2.9e-14	2.49e-12	Slc30a2	ZNT2	desc=Zinc transporter 2 (Rattus norvegicus)	GO:0006812,GO:0008324,GO:0016021,GO:0055085	GO:0005737
PMZ_0040074	PINX1	scaf_00003	8815028	8856223	434.383	2.04569	0.389873	5.24729	1.54e-07	2.4e-06	PINX1	PINX1	desc=PIN2/TERF1-interacting telomerase inhibitor 1 (Homo sapiens)		GO:0000781
PMZ_0040077	Frs2	scaf_00003	9179646	9184282	475.756	2.56677	0.509255	5.04106	4.63e-07	6.08e-06	Frs2	FRS2	desc=Fibroblast growth factor receptor substrate 2 (Mus musculus)	GO:0005158	GO:0005911
PMZ_0040101		scaf_00003	12256655	12266423	798.365	2.61917	0.650734	4.03057	5.56e-05	0.00038491	Similar to Uncharacterized protein C7orf50 homolog	CG050	Note=Similar to Uncharacterized protein C7orf50 homolog (Mus musculus)		GO:0044822
PMZ_0040120	RAD1	scaf_00003	14344653	14354346	1166.87	1.7389	0.493815	3.51935	0.000432601	0.00220501	RAD1	RAD1	desc=Cell cycle checkpoint protein RAD1 (Homo sapiens)	GO:0000077,GO:0005634,GO:0006281	GO:0005634
PMZ_0040122	Cln3	scaf_00003	14402392	14424414	921.545	2.00395	0.504702	3.96875	7.23e-05	0.000482956	Cln3	CLN3	desc=Battenin (Mus musculus)	GO:0016020
PMZ_0040138	TM9SF4	scaf_00003	16176561	16197063	2532.95	1.42982	0.355843	4.02003	5.82e-05	0.000399139	TM9SF4	TM9S4	desc=Transmembrane 9 superfamily member 4 (Bos taurus)	GO:0016021	GO:0016021
PMZ_0040144	HARS	scaf_00003	17827349	17859291	5041.53	1.30323	0.340763	3.8224	0.000132159	0.000807801	HARS	SYHC	desc=Histidine--tRNA ligase%2C cytoplasmic (Bos taurus)	GO:0004812,GO:0005515,GO:0005737,GO:0006418	GO:0005737
PMZ_0040146	Lars	scaf_00003	17873348	17903402	4333.83	1.52402	0.484163	3.14689	0.00165016	0.00685363	Lars	SYLC	desc=Leucine--tRNA ligase%2C cytoplasmic (Mus musculus)	GO:0000166,GO:0002161,GO:0004812,GO:0005524,GO:0006418	GO:0005737
PMZ_0040147	SPG20	scaf_00003	17906487	17926433	2843.47	1.93508	0.427212	4.52739	5.97e-06	5.64e-05	SPG20	SPG20	desc=Spartin (Bos taurus)		GO:0005811
PMZ_0040157	KPNA2	scaf_00003	19626509	19633292	11813.2	2.35196	0.61151	3.851	0.000117639	0.00073406	KPNA2		desc=Importin subunit alpha-1 (Homo sapiens)	GO:0005488,GO:0005515,GO:0005634,GO:0005737,GO:0006606,GO:0008565
PMZ_0040162	Gpank1	scaf_00003	19819879	19820964	376.508	1.88775	0.459053	4.11613	3.85e-05	0.000282318	Gpank1		desc=G patch domain and ankyrin repeat-containing protein 1 (Mus musculus)	GO:0003676,GO:0005515
PMZ_0040163	Tmem184b	scaf_00003	19842041	19863372	526.122	3.21804	0.502053	6.40625	1.49e-10	5.46e-09	Tmem184b		desc=Transmembrane protein 184B (Mus musculus)
PMZ_0040169	BAIAP2	scaf_00003	20351631	20375404	217.805	1.81674	0.556365	3.26409	0.00109816	0.00487471	BAIAP2	BAIP2	desc=Brain-specific angiogenesis inhibitor 1-associated protein 2 (Cricetulus griseus)	GO:0005515,GO:0007009,GO:0008093,GO:0032956	GO:0015629
PMZ_0040171		scaf_00003	20514536	20525195	298.818	1.52641	0.422676	3.61042	0.000305707	0.00164543
PMZ_0040175	JOSD1	scaf_00003	20738616	20754923	649.692	2.30251	0.522534	4.40643	1.05e-05	9.18e-05	JOSD1		desc=Josephin-1 (Bos taurus)	GO:0008242
PMZ_0040180		scaf_00003	21170944	21184341	232.642	2.46613	0.75336	3.28385	0.00102399	0.00460228
PMZ_0040186	ADAP1	scaf_00003	21616907	21644774	557.945	2.25819	0.48998	4.61347	3.96e-06	3.96e-05	ADAP1		desc=Arf-GAP with dual PH domain-containing protein 1 (Homo sapiens)	GO:0005096
PMZ_0040192	mbnl2a	scaf_00003	21752260	21752559	523.229	1.76057	0.353683	4.97837	6.41e-07	8.01e-06	mbnl2a		desc=Muscleblind-like protein 2a (Takifugu rubripes)	GO:0046872
PMZ_0040215	Zfand2b	scaf_00003	24746325	24755980	1858.7	2.10453	0.643205	3.27591	0.00105323	0.00471296	Zfand2b		desc=AN1-type zinc finger protein 2B (Rattus norvegicus)	GO:0008270
PMZ_0040224		scaf_00003	25534817	25548845	391.767	2.26887	0.466796	4.86136	1.17e-06	1.36e-05
PMZ_0040227	STK17A	scaf_00004	1293899	1295067	86.2161	1.80185	0.590327	3.05481	0.00225204	0.00885502	STK17A	ST17A	desc=Serine/threonine-protein kinase 17A (Homo sapiens)	GO:0004672,GO:0005524,GO:0006468,GO:0016772	GO:0005634
PMZ_0040245	PLEKHA3	scaf_00004	6891734	6911821	227.724	2.31987	0.529485	4.37987	1.19e-05	0.000101933	PLEKHA3	PKHA3	desc=Pleckstrin homology domain-containing family A member 3 (Homo sapiens)		GO:0005794
PMZ_0040251		scaf_00004	10015632	10031144	363.199	4.13783	0.731732	5.65963	1.52e-08	3.17e-07			Note=Protein of unknown function
PMZ_0040262	TMEM194A	scaf_00004	10632803	10636652	2095.4	3.01978	0.582717	5.18439	2.17e-07	3.19e-06	TMEM194A	NEMP1	desc=Transmembrane protein 194A (Homo sapiens)
PMZ_0040298	NXPH1	scaf_00004	15857063	15857842	251.346	5.80912	1.00856	5.71215	1.12e-08	2.42e-07	NXPH1	NXPH1/NXPH2	desc=Neurexophilin-1 (Bos taurus)		GO:0005576
PMZ_0040308	Gm1564	scaf_00004	16764721	16771511	102.688	2.56655	0.647443	3.97027	7.18e-05	0.000480207	Gm1564	MEIOC	desc=Uncharacterized protein C17orf104 homolog (Mus musculus)
PMZ_0040327	CHN1	scaf_00004	19318981	19335083	128.797	1.86506	0.55155	3.37782	0.000730618	0.00346406	CHN1	CHIN	desc=N-chimaerin (Homo sapiens)	GO:0007165	GO:0005622
PMZ_0040334		scaf_00004	21510963	21516739	103.746	3.28333	0.644378	5.07944	3.79e-07	5.11e-06			Note=Protein of unknown function	GO:0005089,GO:0035023
PMZ_0040349	NPEPPS	scaf_00004	24114705	24133060	365.632	1.63557	0.451808	3.61866	0.000296136	0.00160101	NPEPPS	PSA/PSAL	desc=Puromycin-sensitive aminopeptidase (Homo sapiens)	GO:0006508,GO:0008237,GO:0008270	GO:0070062
PMZ_0040351	MGAT5	scaf_00004	24594133	24596814	43.7473	3.79244	0.910075	4.13843	3.5e-05	0.000259362	MGAT5	MGT5A	desc=Alpha-1%2C6-mannosylglycoprotein 6-beta-N-acetylglucosaminyltransferase A (Cricetulus griseus)	GO:0006487,GO:0030144	GO:0070062
PMZ_0040352	MGAT5	scaf_00004	24661599	24670245	141.16	1.85305	0.599983	3.09424	0.00197317	0.0079537	MGAT5	MGT5A	desc=Alpha-1%2C6-mannosylglycoprotein 6-beta-N-acetylglucosaminyltransferase A (Cricetulus griseus)	GO:0006487,GO:0030144	GO:0070062
PMZ_0040359	EPC1	scaf_00004	25525828	25562543	1177.15	2.58615	0.487382	5.30358	1.14e-07	1.84e-06	EPC1	EPC1	desc=Enhancer of polycomb homolog 1 (Homo sapiens)	GO:0032777,GO:0035267	GO:0035267
PMZ_0040360		scaf_00004	25566118	25569811	907.791	1.88826	0.504675	3.74058	0.000183598	0.00107002
PMZ_0040367	ZNF112	scaf_00006	1007678	1012796	714.155	1.40028	0.443853	3.15087	0.00162787	0.00678135	ZNF112	ZN728/ZN208	desc=Zinc finger protein 112 (Homo sapiens)	GO:0003676,GO:0046872	GO:0005634
PMZ_0040370	DNAJC21	scaf_00006	1048229	1058310	659.288	1.31143	0.392778	3.33953	0.000839201	0.00388408	DNAJC21	DJC21	desc=DnaJ homolog subfamily C member 21 (Bos taurus)	GO:0046872	GO:0003676
PMZ_0040373	USP3	scaf_00006	1128278	1142565	161.763	1.75843	0.463869	3.79086	0.000150129	0.000900637	USP3	UBP3	desc=Ubiquitin carboxyl-terminal hydrolase 3 (Homo sapiens)	GO:0006511,GO:0036459	GO:0000790
PMZ_0040375	PGP	scaf_00006	1183327	1204383	511.102	1.82182	0.396471	4.59602	4.31e-06	4.25e-05	PGP	PGP	desc=Phosphoglycolate phosphatase (Bos taurus)	GO:0008152,GO:0016791	GO:0000287
PMZ_0040382	Senp8	scaf_00006	2464764	2472461	15394.2	6.61967	0.738106	8.96043	3.23e-19	6.83e-17	Senp8	SENP8	desc=Sentrin-specific protease 8 (Rattus norvegicus)	GO:0006508,GO:0008234	GO:0008234
PMZ_0040383	MYO9A	scaf_00006	2480696	2531572	224.655	1.98604	0.649225	3.05261	0.00226859	0.00890969	MYO9A	MYO9A	desc=Unconventional myosin-IXa (Homo sapiens)	GO:0003774,GO:0005096,GO:0005524,GO:0007165,GO:0016459,GO:0035556,GO:0043547	GO:0005737
PMZ_0040395		scaf_00006	4622423	4633007	97.5011	5.17152	0.979975	5.21365	1.85e-07	2.79e-06			Note=Protein of unknown function
PMZ_0040405	aph1b	scaf_00006	6221732	6249628	855.312	3.22052	0.468994	6.86755	6.53e-12	3.44e-10	aph1b	APH1B	desc=Gamma-secretase subunit Aph-1b (Danio rerio)	GO:0016021,GO:0016485,GO:0043085	GO:0016021
PMZ_0040431	Rln3	scaf_00006	9362422	9364552	172.565	4.89722	0.761188	6.40907	1.46e-10	5.39e-09	Rln3	REL3	desc=Relaxin-3 (Mus musculus)	GO:0005179,GO:0005576	GO:0005576
PMZ_0040445	INSR	scaf_00006	12192556	12197519	128.672	1.79339	0.493218	3.6347	0.0002783	0.0015211	INSR	INSR	desc=Insulin receptor (Homo sapiens)		GO:0005887
PMZ_0040450	Myo9b	scaf_00006	13046275	13087315	1003.7	2.63315	0.687721	3.83735	0.00012437	0.000768659	Myo9b	MYO9B	desc=Unconventional myosin-IXb (Rattus norvegicus)	GO:0003774,GO:0005524,GO:0016459	GO:0015629
PMZ_0040467	SLC39A1	scaf_00006	15096640	15109597	248.194	2.69144	0.45192	5.95321	2.63e-09	6.75e-08	SLC39A1	S39A1	desc=Zinc transporter ZIP1 (Homo sapiens)	GO:0016020,GO:0030001,GO:0046873,GO:0055085	GO:0016021
PMZ_0040468	flad1	scaf_00006	15122875	15146637	333.692	1.62524	0.392649	4.13827	3.5e-05	0.00025945	flad1	FLAD1	desc=FAD synthase (Xenopus laevis)	GO:0003824,GO:0008152	GO:0005737
PMZ_0040479		scaf_00006	16740977	16758395	2806.51	1.77784	0.478148	3.71389	0.000204101	0.00116952		HAX1			GO:0016023
PMZ_0040495	kti12	scaf_00006	17969439	17974731	370.155	2.23058	0.467905	4.76693	1.87e-06	2.06e-05	kti12	KTI12	desc=Protein KTI12 homolog (Danio rerio)		GO:0005524
PMZ_0040496	Rprd2	scaf_00006	18001400	18009688	284.238	2.24668	0.595683	3.76632	0.000165669	0.000979044	Rprd2	RPRD2	desc=Regulation of nuclear pre-mRNA domain-containing protein 2 (Mus musculus)		GO:0016591
PMZ_0040502	LMNA	scaf_00006	18829282	18855010	1058.58	2.86011	0.937267	3.05712	0.00223473	0.00879807	LMNA	LM	desc=Lamin-A (Gallus gallus)	GO:0005198,GO:0005637,GO:0005638,GO:0005882	GO:0005882
PMZ_0040509	Bo17	scaf_00006	19872518	19874693	2887.18	5.5172	0.927034	5.93744	2.89e-09	7.32e-08	Bo17	GCNT1	desc=Beta-1%2C3-galactosyl-O-glycosyl-glycoprotein beta-1%2C6-N-acetylglucosaminyltransferase (Bovine herpesvirus 4 (strain DN-599))	GO:0008375,GO:0016020	GO:0005615
PMZ_0040510	VPS45	scaf_00006	19910353	19917150	1590.56	2.40856	0.413841	5.81821	5.95e-09	1.38e-07	VPS45	VPS45	desc=Vacuolar protein sorting-associated protein 45 (Homo sapiens)	GO:0006904,GO:0016192	GO:0010008
PMZ_0040519	CPEB1	scaf_00006	20428057	20438853	12626.1	5.32804	0.396965	13.4194	4.65e-41	4.52e-37	CPEB1	CPE1B/CPE1A	desc=Cytoplasmic polyadenylation element-binding protein 1 (Homo sapiens)	GO:0000166,GO:0003676	GO:0005737
PMZ_0040526	Prune	scaf_00006	20586026	20592931	174.654	1.42538	0.409988	3.47409	0.000512597	0.00255313	Prune	PRUNE	desc=Protein prune homolog (Rattus norvegicus)		GO:0005737
PMZ_0040537	Slpi	scaf_00005	1443766	1446616	911.807	3.7712	0.98161	3.84166	0.000122204	0.00075741	Slpi		desc=Antileukoproteinase (Mus musculus)	GO:0005576,GO:0030414
PMZ_0040538	DUS3L	scaf_00005	1448429	1462442	1395.1	1.68171	0.447324	3.75919	0.000170462	0.00100371	DUS3L	DUS3L	desc=tRNA-dihydrouridine(47) synthase [NAD(P)(+)]-like (Homo sapiens)	GO:0003824,GO:0008033,GO:0017150,GO:0046872,GO:0050660,GO:0055114	GO:0050660
PMZ_0040543	nhl	scaf_00005	2724094	2725017	59.0869	5.78943	1.23738	4.53436	5.78e-06	5.48e-05	nhl	NHL1	desc=RING finger protein nhl-1 (Caenorhabditis elegans)	GO:0005515,GO:0008270,GO:0046872	GO:0004842
PMZ_0040544	itga5	scaf_00005	2817216	2836992	99.8345	2.23455	0.671019	3.33868	0.000841779	0.0038923	itga5	ITA5/ITA8	desc=Integrin alpha-5 (Xenopus laevis)		GO:0008305
PMZ_0040547	HEXIM1	scaf_00005	3484588	3489715	1189.76	5.10851	0.456665	11.18	5.11e-29	6.2e-26	HEXIM1	HEXI1	desc=Protein HEXIM1 (Homo sapiens)	GO:0000122,GO:0004861,GO:0005634,GO:0005737,GO:0017069	GO:0005737
PMZ_0040555	ube2z	scaf_00005	4877694	4888910	2840.67	1.92731	0.366038	5.26834	1.38e-07	2.17e-06	ube2z	UBE2Z	desc=Ubiquitin-conjugating enzyme E2 Z (Danio rerio)		GO:0005737
PMZ_0040561	C12orf10	scaf_00005	6427251	6437470	497.487	2.54181	0.75773	3.36254	0.000772298	0.0036289	C12orf10	MYG1	desc=UPF0160 protein MYG1%2C mitochondrial (Homo sapiens)		GO:0070062
PMZ_0040563	MNX1	scaf_00005	6796597	6801788	32.3617	5.08208	0.945101	5.23525	1.65e-07	2.53e-06	MNX1	MNX1	desc=Motor neuron and pancreas homeobox protein 1 (Homo sapiens)	GO:0003677,GO:0006355,GO:0043565	GO:0005634
PMZ_0040564	Plekhm3	scaf_00005	6997976	7036781	224.51	1.5059	0.442858	3.39816	0.000678401	0.003245	Plekhm3	PKHM3	desc=Pleckstrin homology domain-containing family M member 3 (Mus musculus)		GO:0046872
PMZ_0040577	St14	scaf_00005	9627159	9635866	577.075	3.46241	1.05802	3.26603	0.00109067	0.00485366	St14	TM11D/TMPS9	desc=Suppressor of tumorigenicity 14 protein homolog (Mus musculus)	GO:0004252,GO:0006508	GO:0005887
PMZ_0040591	Frrs1l	scaf_00005	10751020	10763113	79.2916	3.92367	0.951782	4.10616	4.02e-05	0.000292675	Frrs1l	FRS1L	desc=DOMON domain-containing protein FRRS1L (Mus musculus)		GO:0030054
PMZ_0040604	Bzw2	scaf_00005	13001632	13020853	8054.32	1.20442	0.389093	3.09626	0.00195976	0.00791111	Bzw2	BZW2	desc=Basic leucine zipper and W2 domain-containing protein 2 (Rattus norvegicus)	GO:0005488,GO:0005515	GO:0030154
PMZ_0040609	psma2	scaf_00005	13200071	13205772	4896.26	1.20984	0.3799	3.18724	0.00143636	0.00612406	psma2	PSA2	desc=Proteasome subunit alpha type-2 (Xenopus laevis)	GO:0004175,GO:0004298,GO:0005839,GO:0006511,GO:0019773,GO:0051603	GO:0000932
PMZ_0040611	Invadolysin	scaf_00005	13209943	13227708	1602.84	2.03983	0.530283	3.85475	0.000115847	0.000724741	Invadolysin	LMLN	desc=Leishmanolysin-like peptidase (Drosophila melanogaster)	GO:0004222,GO:0006508,GO:0007155,GO:0016020	GO:0005737
PMZ_0040626	ASIC2	scaf_00005	14266572	14267812	49.7681	4.92263	1.10575	4.36272	1.28e-05	0.000109008	ASIC2	ASIC1/ASIC2	desc=Acid-sensing ion channel 2 (Homo sapiens)	GO:0005272,GO:0006814,GO:0016020	GO:0043197
PMZ_0040649	ARL4A	scaf_00005	16944187	16944788	329.964	3.91759	0.676793	5.78162	7.4e-09	1.67e-07	ARL4A	ARL4C/ARL4A	desc=ADP-ribosylation factor-like protein 4A (Bos taurus)	GO:0005525,GO:0005622,GO:0007264	GO:0005737
PMZ_0040654	SOSTDC1	scaf_00005	17391851	17392417	29.3539	5.14352	1.05256	4.7293	2.25e-06	2.42e-05	SOSTDC1	SOSD1	desc=Sclerostin domain-containing protein 1 (Gallus gallus)	GO:0005615	GO:0005615
PMZ_0040657	Gca	scaf_00005	18010723	18042167	5533.24	1.41924	0.471097	3.01817	0.00254307	0.0097859	Gca	SORCN	desc=Grancalcin (Mus musculus)	GO:0005509	GO:0042584
PMZ_0040663	dbf4	scaf_00005	18654045	18662216	313.24	3.74561	0.623909	5.99603	2.02e-09	5.43e-08	dbf4	DBF4A	desc=Protein DBF4 homolog A (Xenopus tropicalis)	GO:0003676,GO:0008270	GO:0005634
PMZ_0040668	CDK5R1	scaf_00005	19917369	19919141	269.304	5.50409	0.832886	6.57859	4.75e-11	2e-09	CDK5R1	CD5R1	desc=Cyclin-dependent kinase 5 activator 1 (Bos taurus)	GO:0016533,GO:0016534	GO:0030424
PMZ_0040700	bmb	scaf_00009	1608795	1617470	2262.16	6.46424	0.847613	7.6095	2.75e-14	2.39e-12	bmb		desc=Protein brambleberry (Danio rerio)
PMZ_0040704	DUSP10	scaf_00009	2276221	2282053	1875.76	3.22375	0.708263	4.55089	5.34e-06	5.12e-05	DUSP10		desc=Dual specificity protein phosphatase 10 (Bos taurus)	GO:0004725,GO:0006470,GO:0008138,GO:0016311,GO:0016791,GO:0017017
PMZ_0040724	ARHGAP35	scaf_00009	7846190	7862752	7426.1	1.97634	0.465411	4.24778	2.16e-05	0.000171459	ARHGAP35		desc=Rho GTPase-activating protein 35 (Canis familiaris)	GO:0007165
PMZ_0040750		scaf_00009	11221229	11232117	401.629	1.86022	0.565252	3.28661	0.00101402	0.00456275
PMZ_0040781	KCNK1	scaf_00009	15640027	15652962	112.897	3.79625	0.754792	5.02252	5.1e-07	6.58e-06	KCNK1		desc=Potassium channel subfamily K member 1 (Bos taurus)	GO:0005267,GO:0016020,GO:0016021,GO:0071805
PMZ_0040782	TARBP1	scaf_00009	15732655	15755628	509.048	1.75983	0.524929	3.35061	0.000806333	0.00376063	TARBP1		desc=Probable methyltransferase TARBP1 (Homo sapiens)
PMZ_0040797	BBS1	scaf_00009	17474699	17482451	316.624	2.88983	0.752093	3.82875	0.000128795	0.000791222	BBS1		desc=Bardet-Biedl syndrome 1 protein (Homo sapiens)	GO:0034464,GO:0035058
PMZ_0040809	STX12	scaf_00002	1852199	1864387	374.663	1.83184	0.500757	3.65464	0.000257548	0.00142695	STX12	STX12	desc=Syntaxin-12 (Homo sapiens)	GO:0016020,GO:0016192	GO:0010008
PMZ_0040813	ccdc25	scaf_00002	2162277	2173867	1356.6	1.36555	0.41092	3.32687	0.000878278	0.00403418	ccdc25	CCD25	desc=Coiled-coil domain-containing protein 25 (Xenopus tropicalis)
PMZ_0040814	SNPH	scaf_00002	2190327	2193400	133.965	5.53056	0.618294	8.87927	6.73e-19	1.33e-16	SNPH	SNPH	desc=Syntaphilin (Homo sapiens)	GO:0003735,GO:0005622,GO:0005840,GO:0006412	GO:0030054
PMZ_0040815		scaf_00002	2312819	2345502	248.33	1.82223	0.501949	3.64285	0.000269631	0.00148116
PMZ_0040824		scaf_00002	3007193	3013955	310.139	3.36523	0.749556	4.49452	6.97e-06	6.45e-05		H1BP3			GO:0035091
PMZ_0040851	GTSF1	scaf_00002	6441049	6447135	33.9781	2.49683	0.816246	3.05228	0.00227107	0.00891583	GTSF1	GTSF1	desc=Gametocyte-specific factor 1 (Homo sapiens)		GO:0046872
PMZ_0040854	Stk35	scaf_00002	7147075	7164145	2038.01	2.17306	0.635463	3.40779	0.000654907	0.00314812	Stk35	PDK1L	desc=Serine/threonine-protein kinase 35 (Mus musculus)	GO:0004672,GO:0005524,GO:0006468,GO:0016772	GO:0005634
PMZ_0040858	Slc2a10	scaf_00002	7580184	7596568	296.165	2.05259	0.397407	5.16226	2.44e-07	3.54e-06	Slc2a10	GTR10	desc=Solute carrier family 2%2C facilitated glucose transporter member 10 (Mus musculus)	GO:0005215,GO:0016021,GO:0022857,GO:0055085	GO:0012505
PMZ_0040864	TBPL1	scaf_00002	8490628	8501152	853.695	2.83485	0.518754	5.46474	4.64e-08	8.4e-07	TBPL1	TBPL1	desc=TATA box-binding protein-like protein 1 (Gallus gallus)	GO:0003677,GO:0006352	GO:0005737
PMZ_0040872	Csmd3	scaf_00002	10282546	10328201	25812.9	6.49434	0.855606	7.57806	3.51e-14	2.99e-12	Csmd3	CSMD3	desc=CUB and sushi domain-containing protein 3 (Mus musculus)		GO:0016021
PMZ_0040879	RCC1	scaf_00002	11389325	11397803	1078.81	2.45239	0.489773	5.00869	5.48e-07	7.01e-06	RCC1	RCC1	desc=Regulator of chromosome condensation (Homo sapiens)		GO:0005737
PMZ_0040885	ttc17	scaf_00002	13325311	13368487	2003.57	1.21312	0.333997	3.63138	0.000281915	0.00153826	ttc17	TTC17	desc=Tetratricopeptide repeat protein 17 (Danio rerio)	GO:0005515	GO:0015629
PMZ_0040898	Sqle	scaf_00002	14067044	14078424	1364.04	1.77211	0.57342	3.08516	0.00203442	0.00814575	Sqle	ERG1	desc=Squalene monooxygenase (Mus musculus)	GO:0004506,GO:0016021,GO:0050660,GO:0055114	GO:0005789
PMZ_0040908	Fbxo3	scaf_00002	15383823	15410148	164.074	1.86297	0.428802	4.34239	1.41e-05	0.000118315	Fbxo3	FBX3	desc=F-box only protein 3 (Mus musculus)	GO:0005515,GO:0006508,GO:0016567	GO:0005737
PMZ_0040934		scaf_00002	18193942	18227067	556.411	2.94108	0.598687	4.90625	9.28e-07	1.11e-05		GAS2			GO:0005884
PMZ_0040935	HTATIP2	scaf_00002	18599620	18610466	183.254	2.74021	0.716599	3.82787	0.000129255	0.000793358	HTATIP2	HTAI2	desc=Oxidoreductase HTATIP2 (Homo sapiens)		GO:0005737
PMZ_0040939	MPPED2	scaf_00002	19224252	19280840	234.066	2.99233	0.789854	3.79332	0.000148648	0.000893405	MPPED2	MPPD2	desc=Metallophosphoesterase MPPED2 (Homo sapiens)		GO:0016787
PMZ_0040956	TMEM19	scaf_00002	21761149	21766485	44.8476	3.71822	0.800728	4.6169	3.9e-06	3.91e-05	TMEM19	TMM19	desc=Transmembrane protein 19 (Homo sapiens)	GO:0016021	GO:0016021
PMZ_0040967	Fam60a	scaf_00002	24912514	24932483	288.945	2.3522	0.677108	3.4764	0.000508198	0.00253456	Fam60a	FA60A	desc=Protein FAM60A (Mus musculus)		GO:0016580
PMZ_0040970	usp47	scaf_00002	25034798	25046653	1070.54	1.29132	0.406341	3.17684	0.00148892	0.00631213	usp47	UBP47	desc=Ubiquitin carboxyl-terminal hydrolase 47 (Xenopus tropicalis)		GO:0005737
PMZ_0040981	Heph	scaf_00002	25987378	26018283	65.2467	2.60153	0.832638	3.12358	0.00178668	0.00732046	Heph	HEPH	desc=Hephaestin (Mus musculus)	GO:0004322,GO:0005507,GO:0006825,GO:0006879	GO:0016323
PMZ_0040999		scaf_00002	27375861	27378126	8.66413	5.44532	1.30964	4.06302	4.84e-05	0.000343046				GO:0046983
PMZ_0041000		scaf_00002	27393154	27394033	9.68404	4.17518	1.30935	3.08098	0.00206323	0.00823205				GO:0046983
PMZ_0041023	GRHL2	scaf_00001	5455974	5509550	1447.5	2.29676	0.462741	4.96481	6.88e-07	8.49e-06	GRHL2	TAF1B	desc=Grainyhead-like protein 2 homolog (Homo sapiens)		GO:0005730
PMZ_0041024	Gmnn	scaf_00001	5667017	5684962	6418.69	3.88807	0.397561	9.78414	1.32e-22	5.36e-20	Gmnn	GEMI	desc=Geminin (Mus musculus)	GO:0006275	GO:0005737
PMZ_0041031	Rpn2	scaf_00001	6109629	6131549	2732.27	1.56556	0.513014	3.05497	0.00225086	0.00885502	Rpn2	RPN2	desc=Dolichyl-diphosphooligosaccharide--protein glycosyltransferase subunit 2 (Rattus norvegicus)	GO:0006487,GO:0008250,GO:0016021	GO:0016021
PMZ_0041039	PDIA6	scaf_00001	6478692	6493675	6005.13	3.52689	0.569523	6.1958	5.8e-10	1.82e-08	PDIA6	PDIA6	desc=Protein disulfide-isomerase A6 (Mesocricetus auratus)	GO:0016853,GO:0045454	GO:0005788
PMZ_0041045	Fbxo43	scaf_00001	7039263	7044647	347.092	3.03199	0.921195	3.28712	0.00101218	0.00455655	Fbxo43	FBX43	desc=F-box only protein 43 (Mus musculus)		GO:0008270
PMZ_0041047	AGO2	scaf_00001	7170784	7176986	125.603	2.1074	0.644372	3.26915	0.00107873	0.00481155	AGO2	AGO2	desc=Protein argonaute-2 (Fragment) (Oryctolagus cuniculus)	GO:0003676	GO:0000932
PMZ_0041083	PKIA	scaf_00001	12728088	12730845	183.756	4.02087	1.0676	3.75222	0.000175275	0.00102675	PKIA	IPKA	desc=cAMP-dependent protein kinase inhibitor alpha (Gallus gallus)	GO:0004862,GO:0006469
PMZ_0041109	TMEM164	scaf_00001	15319255	15333312	212.306	2.32051	0.657127	3.52927	0.000416707	0.00213858	TMEM164	TM164	desc=Transmembrane protein 164 (Bos taurus)		GO:0016021
PMZ_0041123	MED17	scaf_00001	19571428	19581482	1894.86	1.29928	0.39054	3.32693	0.000878071	0.00403418	MED17	MED17	desc=Mediator of RNA polymerase II transcription subunit 17 (Gallus gallus)	GO:0001104,GO:0006357,GO:0016592	GO:0016592
PMZ_0041131	CEP63	scaf_00001	20202615	20220647	572.833	1.522	0.481833	3.15417	0.00160954	0.00671649	CEP63	CEP63	desc=Centrosomal protein of 63 kDa (Gallus gallus)	GO:0005813,GO:0007099	GO:0005814
PMZ_0041132	Amotl2	scaf_00001	20221328	20236569	954.003	2.82867	0.494457	5.71865	1.07e-08	2.35e-07	Amotl2	AMOT/AMOL1	desc=Angiomotin-like protein 2 (Rattus norvegicus)		GO:0016324
PMZ_0041139	ZNHIT1	scaf_00001	20425160	20428831	490.123	1.9371	0.586679	3.30236	0.000958741	0.00434723	ZNHIT1	ZNHI1	desc=Zinc finger HIT domain-containing protein 1 (Bos taurus)		GO:0005634
PMZ_0041145	TMCO3	scaf_00001	20962415	20978992	629.604	2.62139	0.654712	4.00231	6.27e-05	0.00042632	TMCO3	TMCO3	desc=Transmembrane and coiled-coil domain-containing protein 3 (Homo sapiens)	GO:0006812,GO:0015299,GO:0016021,GO:0055085	GO:0016021
PMZ_0041146		scaf_00001	21000037	21012236	276.095	1.93137	0.574369	3.35562	0.000791871	0.00370423
PMZ_0041157	FNDC4	scaf_00001	23459932	23496887	129.719	2.03672	0.498739	4.08715	4.37e-05	0.000314528	FNDC4	FNDC5	desc=Fibronectin type III domain-containing protein 4 (Bos taurus)	GO:0005515	GO:0005783
PMZ_0041169	PRRG3	scaf_00001	24500390	24510041	151.478	2.84315	0.526565	5.39603	6.81e-08	1.18e-06	PRRG3	TMG1/TMG3	desc=Transmembrane gamma-carboxyglutamic acid protein 3 (Homo sapiens)	GO:0005509,GO:0005576	GO:0005576
PMZ_0041178	Sccpdh	scaf_00001	25828712	25847969	5068.58	4.83206	0.551042	8.76425	1.88e-18	3.41e-16	Sccpdh	SCPDL	desc=Saccharopine dehydrogenase-like oxidoreductase (Mus musculus)	GO:0016491,GO:0055114	GO:0005811
PMZ_0041181	Lancl3	scaf_00001	25973820	26000881	10.3681	3.45664	1.06383	3.17041	0.00152226	0.00641808	Lancl3	LANC3	desc=LanC-like protein 3 (Mus musculus)		GO:0003824
PMZ_0041211	SRP68	scaf_00011	2008664	2022921	903.766	1.91451	0.556171	3.43914	0.000583572	0.00285646	SRP68	SRP68	desc=Signal recognition particle subunit SRP68 (Canis familiaris)	GO:0005515
PMZ_0041215	SHMT1	scaf_00011	3121430	3137647	2207.57	1.52149	0.474421	3.20461	0.00135245	0.00581482	SHMT1	GLYC/GLYA	desc=Serine hydroxymethyltransferase%2C cytosolic (Pongo abelii)	GO:0003824,GO:0004372,GO:0006544,GO:0006563,GO:0030170	GO:0005737
PMZ_0041222	Mapre1	scaf_00011	3681913	3735389	1194.65	1.37927	0.454871	3.03057	0.00244091	0.00945267	Mapre1	ADA17/MARE1	desc=Microtubule-associated protein RP/EB family member 1 (Mus musculus)	GO:0005515,GO:0008017	GO:0031253
PMZ_0041223	csp	scaf_00011	3749195	3765283	57.1846	1.6221	0.523043	3.10223	0.00192067	0.00777596	csp	DNJC5	desc=Cysteine string protein (Xenopus laevis)		GO:0070062
PMZ_0041224	SYNGR2	scaf_00011	4417615	4428715	1325.04	2.90516	0.570902	5.08662	3.65e-07	4.97e-06	SYNGR2	SNG2	desc=Synaptogyrin-2 (Bos taurus)	GO:0016020	GO:0070062
PMZ_0041227		scaf_00011	4571372	4584198	333.669	1.88441	0.474176	3.9748	7.04e-05	0.000471981		CC137			GO:0044822
PMZ_0041229	Coq7	scaf_00011	4594193	4600118	549.597	1.75186	0.443714	3.9497	7.82e-05	0.000517346	Coq7	COQ7	desc=Ubiquinone biosynthesis protein COQ7 homolog (Mus musculus)	GO:0006744,GO:0055114	GO:0005743
PMZ_0041234	Trmt1	scaf_00011	5217090	5233257	520.337	1.72387	0.461401	3.73694	0.000186272	0.00108107	Trmt1	TRM1	desc=tRNA (guanine(26)-N(2))-dimethyltransferase (Mus musculus)	GO:0003723,GO:0004809,GO:0008033	GO:0046872
PMZ_0041235	RCJMB04_5l6	scaf_00011	5240023	5240643	734.711	2.14339	0.446697	4.79796	1.6e-06	1.8e-05	RCJMB04_5l6	CF120	desc=UPF0669 protein C6orf120 homolog (Gallus gallus)		GO:0005576
PMZ_0041243	Thoc1	scaf_00011	6468118	6482053	587.669	2.45293	0.542781	4.51599	6.3e-06	5.91e-05	Thoc1	THOC1	desc=THO complex subunit 1 (Mus musculus)		GO:0005737
PMZ_0041244	Thoc1	scaf_00011	6483651	6488104	599.305	1.37825	0.340606	4.04557	5.22e-05	0.000365237	Thoc1	THOC1	desc=THO complex subunit 1 (Mus musculus)		GO:0005737
PMZ_0041248	MRPL15	scaf_00011	6933983	6937288	1203.6	1.31978	0.388101	3.40339	0.000665546	0.00319139	MRPL15	RM15	desc=39S ribosomal protein L15%2C mitochondrial (Gallus gallus)	GO:0003735,GO:0006412,GO:0015934	GO:0015934
PMZ_0041259	Ext1	scaf_00011	7402903	7417667	628.253	3.63826	0.611289	5.94758	2.72e-09	6.92e-08	Ext1	EXT1	desc=Exostosin-1 (Mus musculus)		GO:0000139
PMZ_0041262	MED30	scaf_00011	7489123	7493612	560.935	1.38167	0.453578	3.04761	0.00230669	0.0090265	MED30	MED30	desc=Mediator of RNA polymerase II transcription subunit 30 (Homo sapiens)		GO:0005634
PMZ_0041269	VSNL1	scaf_00011	7721821	7724305	106.58	4.98809	1.09786	4.48468	7.3e-06	6.71e-05	VSNL1	VISL1	desc=Visinin-like protein 1 (Bos taurus)	GO:0005509,GO:0019722	GO:0005509
PMZ_0041271	DDX43	scaf_00011	7912022	7933123	4276.07	2.55209	0.531781	4.79253	1.65e-06	1.84e-05	DDX43	DDX43	desc=Probable ATP-dependent RNA helicase DDX43 (Homo sapiens)	GO:0003676,GO:0003723,GO:0005524	GO:0005622
PMZ_0041280	Pam16	scaf_00011	9142833	9149032	336.109	2.12605	0.413155	5.14539	2.67e-07	3.84e-06	Pam16	TIM16/TI16A	desc=Mitochondrial import inner membrane translocase subunit TIM16 (Mus musculus)	GO:0005744,GO:0030150	GO:0005744
PMZ_0041321	St6galnac2	scaf_00011	14630451	14654949	139.205	4.2074	0.682863	6.15517	7.5e-10	2.24e-08	St6galnac2	SIA7B	desc=Alpha-N-acetylgalactosaminide alpha-2%2C6-sialyltransferase 2 (Mus musculus)	GO:0006486,GO:0008373	GO:0030173
PMZ_0041348	slc25a40	scaf_00016	382224	399463	713.773	1.75745	0.513136	3.4274	0.000609393	0.00296678	slc25a40	S2539	desc=Solute carrier family 25 member 40 (Xenopus tropicalis)		GO:0016021
PMZ_0041377	myrip	scaf_00016	7456637	7489870	214.792	3.2398	0.815698	3.97995	6.89e-05	0.000462508	myrip	MYRIP	desc=Rab effector MyRIP (Danio rerio)	GO:0006886,GO:0017137	GO:0015629
PMZ_0041406		scaf_00016	12154706	12196365	675.414	1.71051	0.473983	3.61279	0.000302915	0.00163448			Note=Protein of unknown function	GO:0003824,GO:0016715,GO:0055114
PMZ_0041407	RND3	scaf_00016	12329274	12357639	144.171	5.14678	0.693473	7.38487	1.53e-13	1.18e-11	RND3	RND3	desc=Rho-related GTP-binding protein RhoE (Homo sapiens)	GO:0005525,GO:0005622,GO:0007165,GO:0007264,GO:0015031,GO:0016020	GO:0070062
PMZ_0041411	C1GALT1	scaf_00016	12783377	12799147	156.839	2.93457	0.563588	5.22166	1.77e-07	2.7e-06	C1GALT1	C1GLT	desc=Glycoprotein-N-acetylgalactosamine 3-beta-galactosyltransferase 1 (Gallus gallus)	GO:0016020,GO:0016263,GO:0016266,GO:0016757	GO:0016021
PMZ_0041418	Gpd1l	scaf_00016	13392476	13400594	2526.54	1.87885	0.496699	3.7837	0.000154516	0.000923244	Gpd1l	GPD1L	desc=Glycerol-3-phosphate dehydrogenase 1-like protein (Mus musculus)	GO:0004367,GO:0005975,GO:0006072,GO:0009331,GO:0016491,GO:0016616,GO:0042803,GO:0046168,GO:0051287,GO:0055114	GO:0070062
PMZ_0041425	Lrp2	scaf_00016	14113443	14129513	11976.6	3.53007	0.951354	3.71765	0.000201088	0.00115498	Lrp2	LRP4	desc=Low-density lipoprotein receptor-related protein 2 (Mus musculus)	GO:0005509,GO:0005515	GO:0009986
PMZ_0041435	MYLK	scaf_00016	15354608	15370224	2164.82	3.23782	0.669502	4.85386	1.21e-06	1.4e-05	MYLK	MYLK	desc=Myosin light chain kinase%2C smooth muscle (Bos taurus)	GO:0004672,GO:0005515,GO:0005524,GO:0006468,GO:0016772	GO:0032154
PMZ_0041436		scaf_00016	15370334	15371005	37.9734	2.78143	0.72139	3.85348	0.00011645	0.000727815
PMZ_0041452	FAM53A	scaf_00015	798824	806938	95.9822	1.93794	0.459635	4.21576	2.49e-05	0.000194176	FAM53A	FA53A	desc=Protein FAM53A (Homo sapiens)		GO:0005634
PMZ_0041457	DDX56	scaf_00015	956669	972699	1461.5	1.59233	0.404989	3.93222	8.42e-05	0.000549728	DDX56	DDX56	desc=Probable ATP-dependent RNA helicase DDX56 (Bos taurus)	GO:0003676,GO:0005524	GO:0016020
PMZ_0041469	HPSE	scaf_00015	2326908	2339130	373.877	2.11568	0.53228	3.98443	6.76e-05	0.000455761	HPSE	HPSE	desc=Heparanase (Homo sapiens)	GO:0005975,GO:0016020,GO:0016798	GO:0005576
PMZ_0041470	LMAN2L	scaf_00015	2345339	2356248	151.032	2.47488	0.67676	3.65313	0.000259065	0.00143249	LMAN2L	LMA2L/LMAN2	desc=VIP36-like protein (Homo sapiens)	GO:0016020
PMZ_0041494	Prc1	scaf_00015	5218749	5223882	399.559	2.41678	0.67748	3.56399	0.000365257	0.00191449	Prc1	PRC1	desc=Protein regulator of cytokinesis 1 (Mus musculus)	GO:0000226,GO:0000910,GO:0008017	GO:0005737
PMZ_0041495	PRC1	scaf_00015	5224758	5226017	206.495	3.54796	0.732617	4.83058	1.36e-06	1.55e-05	PRC1	PRC1	desc=Protein regulator of cytokinesis 1 (Homo sapiens)	GO:0000226,GO:0000910,GO:0008017	GO:0005737
PMZ_0041508	RNF122	scaf_00015	7710987	7725689	610.366	3.24392	0.680229	4.7713	1.83e-06	2.03e-05	RNF122	RN122	desc=RING finger protein 122 (Homo sapiens)	GO:0005515,GO:0008270	GO:0005783
PMZ_0041524	EIF2AK3	scaf_00015	10075973	10079080	211.903	1.58557	0.472013	3.35751	0.000786469	0.00368213	EIF2AK3	E2AK3	desc=Eukaryotic translation initiation factor 2-alpha kinase 3 (Homo sapiens)	GO:0004672,GO:0005524,GO:0006468,GO:0016772	GO:0005737
PMZ_0041531	Kcmf1	scaf_00015	10344904	10362201	4140.58	1.52211	0.46072	3.30163	0.000961261	0.00435764	Kcmf1	KCMF1	desc=E3 ubiquitin-protein ligase KCMF1 (Mus musculus)	GO:0008270,GO:0046872	GO:0016874
PMZ_0041543	Lyar	scaf_00015	11382418	11391986	1949.2	3.01134	0.456176	6.60202	4.06e-11	1.75e-09	Lyar	LYAR	desc=Cell growth-regulating nucleolar protein (Mus musculus)		GO:0005730
PMZ_0041547		scaf_00015	11878204	11891160	2537.43	2.57959	0.700113	3.67227	0.000240403	0.00134345		CT194	Note=Similar to Uncharacterized protein C20orf194 homolog (Mus musculus)
PMZ_0041549	Atrn	scaf_00015	12237414	12248120	194.617	2.38936	0.537956	4.4434	8.85e-06	7.91e-05	Atrn	ATRN	desc=Attractin (Mus musculus)		GO:0005737
PMZ_0041565	Myof	scaf_00015	14885494	14904293	355.697	2.16472	0.626844	3.458	0.00054421	0.00268921	Myof	MYOF	desc=Myoferlin (Mus musculus)	GO:0005515	GO:0005901
PMZ_0041570	WBP1	scaf_00015	15278238	15288701	2087.08	3.55064	0.646462	5.49746	3.85e-08	7.18e-07	WBP1	WBP1	desc=WW domain-binding protein 1 (Homo sapiens)		GO:0050699
PMZ_0041576	smndc1	scaf_00015	15828577	15833004	2305.21	1.59794	0.367642	4.34939	1.37e-05	0.000114948	smndc1	SPF30	desc=Survival of motor neuron-related-splicing factor 30 (Danio rerio)	GO:0003723,GO:0005634,GO:0005737,GO:0006397	GO:0015030
PMZ_0041577	SDR39U1	scaf_00015	15903766	15904659	3666.95	5.70604	0.463486	12.3125	7.76e-35	1.51e-31	SDR39U1	D39U1	desc=Epimerase family protein SDR39U1 (Bos taurus)	GO:0003824,GO:0050662	GO:0016491
PMZ_0041587	TGFBR3	scaf_00007	1196330	1217012	474.267	3.03729	0.575681	5.29022	1.22e-07	1.95e-06	TGFBR3	TGBR3	desc=Transforming growth factor beta receptor type 3 (Sus scrofa)		GO:0005737
PMZ_0041629	PPM1E	scaf_00007	7830248	7861341	384.981	2.42787	0.66322	3.66009	0.000252131	0.00140133	PPM1E	PPM1E	desc=Protein phosphatase 1E (Homo sapiens)	GO:0003824,GO:0004722,GO:0006470	GO:0005739
PMZ_0041631	Crk	scaf_00007	8012432	8018637	1589.53	2.0871	0.403642	5.17224	2.31e-07	3.37e-06	Crk	CRKL	desc=Adapter molecule crk (Rattus norvegicus)	GO:0005515	GO:0005737
PMZ_0041653		scaf_00007	9846970	9857226	56.085	2.28532	0.627056	3.65451	0.000257678	0.00142726			Note=Protein of unknown function
PMZ_0041665	TMEM246	scaf_00007	14080747	14083133	98.5286	2.25144	0.609736	3.69001	0.000224247	0.00126702	TMEM246	TM246	desc=Transmembrane protein 246 (Homo sapiens)		GO:0016021
PMZ_0041670	Pptc7	scaf_00007	14186581	14198224	805.179	1.98982	0.580853	3.42602	0.000612499	0.00297891	Pptc7	PPTC7	desc=Protein phosphatase PTC7 homolog (Mus musculus)	GO:0003824	GO:0046872
PMZ_0041689	SNAP29	scaf_00007	16543442	16551993	311.999	2.44893	0.63682	3.84888	0.000118658	0.000739237	SNAP29	SNP29	desc=Synaptosomal-associated protein 29 (Homo sapiens)	GO:0005515	GO:0030054
PMZ_0041704	DSC1	scaf_00007	17530792	17551361	18.2876	3.00265	0.936843	3.18282	0.00145849	0.00620345	DSC1	DSC1	desc=Desmocollin-1 (Homo sapiens)	GO:0005509,GO:0005886,GO:0007155,GO:0007156,GO:0016020	GO:0030057
PMZ_0041713	TTN	scaf_00007	19261396	19281185	394.35	1.95803	0.54763	3.57526	0.000349875	0.00184482	TTN	TITIN	desc=Titin (Homo sapiens)		GO:0000794
PMZ_0041718	FOCAD	scaf_00013	278420	302081	1015	1.91395	0.52476	3.64063	0.000271973	0.00149197	FOCAD	FOCAD	desc=Focadhesin (Homo sapiens)	GO:0005488	GO:0005925
PMZ_0041728	pi4kb	scaf_00013	1087750	1097110	351.403	3.17746	0.503502	6.31019	2.79e-10	9.48e-09	pi4kb	PI4KB	desc=Phosphatidylinositol 4-kinase beta (Danio rerio)	GO:0004430,GO:0006661,GO:0016772,GO:0016773,GO:0046854,GO:0048015	GO:0005741
PMZ_0041729	RAB27A	scaf_00013	1335015	1347849	242.183	4.94088	0.531778	9.27762	1.73e-20	4.68e-18	RAB27A	RB27A	desc=Ras-related protein Rab-27A (Canis familiaris)	GO:0005525,GO:0007165,GO:0007264,GO:0015031,GO:0016020	GO:0030425
PMZ_0041732	ARPP19	scaf_00013	2298375	2311487	424.957	1.81381	0.41136	4.41268	1.02e-05	8.95e-05	ARPP19	ENSA/ARP19	desc=cAMP-regulated phosphoprotein 19 (Gallus gallus)		GO:0005737
PMZ_0041734	ATP8B2	scaf_00013	2556312	2612280	2549.97	1.2242	0.364927	3.35255	0.000800704	0.00373796	ATP8B2	AT8B2	desc=Phospholipid-transporting ATPase ID (Homo sapiens)	GO:0000166,GO:0000287,GO:0004012,GO:0005524,GO:0015914,GO:0016021,GO:0046872	GO:0005794
PMZ_0041753	APH1A	scaf_00013	8120805	8130751	1906.42	3.28131	0.348353	9.41957	4.53e-21	1.4e-18	APH1A	APH1A	desc=Gamma-secretase subunit APH-1A (Homo sapiens)	GO:0016021,GO:0016485,GO:0043085	GO:0005783
PMZ_0041755		scaf_00013	8257899	8268077	929.292	2.37718	0.471443	5.03776	4.71e-07	6.18e-06
PMZ_0041757	CIART	scaf_00013	8371728	8381412	136.514	3.36073	0.729889	4.60383	4.15e-06	4.12e-05	CIART	CIART	desc=Circadian-associated transcriptional repressor (Homo sapiens)		GO:0005634
PMZ_0041758	TAF1C	scaf_00013	8405729	8415546	228.994	2.23179	0.454119	4.91163	9.03e-07	1.08e-05	TAF1C	TAF1C	desc=TATA box-binding protein-associated factor RNA polymerase I subunit C (Homo sapiens)		GO:0005634
PMZ_0041761		scaf_00013	8568567	8572256	75.8044	1.97357	0.606644	3.25141	0.00114834	0.00505243
PMZ_0041777	SLC25A44	scaf_00013	14163583	14167683	307.537	2.63922	0.592394	4.45587	8.36e-06	7.51e-05	SLC25A44	S2544	desc=Solute carrier family 25 member 44 (Homo sapiens)		GO:0016021
PMZ_0041783	htr1aa	scaf_00013	15297752	15299131	101.556	5.2944	1.6136	3.08128	0.00206113	0.008228	htr1aa	5H1AA	desc=5-hydroxytryptamine receptor 1A-alpha (Takifugu rubripes)	GO:0004930,GO:0004993,GO:0005887,GO:0007186,GO:0008283,GO:0016021,GO:0042310,GO:0046883,GO:0050795	GO:0005887
PMZ_0041786	Ipo11	scaf_00013	15410020	15466091	782.686	2.14596	0.518567	4.13552	3.54e-05	0.000261571	Ipo11	IPO11	desc=Importin-11 (Mus musculus)	GO:0005488	GO:0005737
PMZ_0041787	slc30a5	scaf_00013	15468651	15485762	1727.51	1.78306	0.563994	3.15311	0.00161542	0.00673959	slc30a5	ZNT5	desc=Zinc transporter 5 (Danio rerio)	GO:0006812,GO:0008324,GO:0016021,GO:0055085	GO:0005794
PMZ_0041800	XXYLT1	scaf_00028	308962	318609	1449.77	1.59859	0.449148	3.56121	0.000369155	0.00193282	XXYLT1	XXLT1	desc=Xyloside xylosyltransferase 1 (Homo sapiens)		GO:0005789
PMZ_0041805	arm	scaf_00028	1438765	1440650	1287.77	2.73272	0.661798	4.13093	3.61e-05	0.000266249	arm	CTNB1	desc=Armadillo segment polarity protein (Drosophila melanogaster)		GO:0005912
PMZ_0041809	RND1	scaf_00028	2176125	2185219	55.3714	5.70642	1.02404	5.417	6.06e-08	1.06e-06	RND1	RND1	desc=Rho-related GTP-binding protein Rho6 (Bos taurus)	GO:0005525,GO:0007264	GO:0005912
PMZ_0041816	STAM	scaf_00028	3784072	3799783	1290.34	2.08171	0.57526	3.61243	0.000303341	0.00163632	STAM	STAM1	desc=Signal transducing adapter molecule 1 (Homo sapiens)	GO:0005515,GO:0006886	GO:0005829
PMZ_0041818	dcakd	scaf_00028	3827330	3834992	217.76	2.37838	0.725049	3.27822	0.00104465	0.00467996	dcakd	DCAKD	desc=Dephospho-CoA kinase domain-containing protein (Xenopus tropicalis)	GO:0004140,GO:0005524,GO:0015937	GO:0005524
PMZ_0041822	abcb6	scaf_00028	4494430	4533969	649.299	2.10593	0.575319	3.65514	0.000257046	0.00142457	abcb6	ABCB6	desc=ATP-binding cassette sub-family B member 6%2C mitochondrial (Xenopus tropicalis)	GO:0005524,GO:0006810,GO:0016021,GO:0016887,GO:0042626,GO:0055085	GO:0005783
PMZ_0041825	JRKL	scaf_00028	4601711	4627033	717.462	1.44584	0.429151	3.36892	0.000754645	0.00356406	JRKL	JERKL	desc=Jerky protein homolog-like (Homo sapiens)	GO:0003676,GO:0003677,GO:0005515	GO:0005634
PMZ_0041834	plxdc2	scaf_00028	6093706	6099575	652.229	4.7785	0.734796	6.50805	7.61e-11	3.04e-09	plxdc2		desc=Plexin domain-containing protein 2 (Xenopus laevis)
PMZ_0041838	C1GALT1	scaf_00028	7211307	7226686	1069.73	2.63567	0.543449	4.84557	1.26e-06	1.45e-05	C1GALT1	C1GLT	desc=Glycoprotein-N-acetylgalactosamine 3-beta-galactosyltransferase 1 (Homo sapiens)	GO:0016020,GO:0016263,GO:0016266,GO:0016757	GO:0000139
PMZ_0041842	MFSD5	scaf_00028	8174716	8178922	288.475	3.31537	0.530991	6.24164	4.33e-10	1.39e-08	MFSD5	MFSD5	desc=Molybdate-anion transporter (Bos taurus)	GO:0015098,GO:0015689,GO:0016021	GO:0016021
PMZ_0041848	Nom1	scaf_00028	9583419	9596979	982.896	1.83275	0.417059	4.3996	1.08e-05	9.44e-05	Nom1	NOM1	desc=Nucleolar MIF4G domain-containing protein 1 (Mus musculus)	GO:0003723,GO:0005488,GO:0005515	GO:0005730
PMZ_0041851	tspan31	scaf_00028	9906612	9915159	936.565	2.1263	0.479137	4.43397	9.25e-06	8.22e-05	tspan31	TSN31	desc=Tetraspanin-31-B (Xenopus laevis)	GO:0016021	GO:0016021
PMZ_0041864	Tbr1	scaf_00028	11693634	11704786	137.759	3.51007	0.763028	4.595	4.33e-06	4.26e-05	Tbr1	TBR1	desc=T-box brain protein 1 (Mus musculus)	GO:0003700,GO:0005634,GO:0006355	GO:0005634
PMZ_0041898	Ppfia3	scaf_00014	6002612	6017224	28.615	1.91729	0.618587	3.09503	0.00196792	0.00793749	Ppfia3		desc=Liprin-alpha-3 (Mus musculus)	GO:0045202,GO:0050808
PMZ_0041910	GYS1	scaf_00014	6683380	6701738	2093.86	2.72465	0.585781	4.67328	2.96e-06	3.07e-05	GYS1		desc=Glycogen [starch] synthase%2C muscle (Bos taurus)	GO:0004373,GO:0005978
PMZ_0041922	LOH12CR1	scaf_00014	8915995	8917379	196.274	2.11672	0.522704	4.0441	5.25e-05	0.000367005	LOH12CR1		desc=Loss of heterozygosity 12 chromosomal region 1 protein homolog (Gallus gallus)
PMZ_0041924	TEN1	scaf_00014	9085426	9102866	362.291	1.67073	0.546863	3.05094	0.00228123	0.00894661	TEN1		desc=CST complex subunit TEN1 (Homo sapiens)	GO:0003697,GO:0070188
PMZ_0041931	tmem41b	scaf_00014	10656498	10662868	1524.28	1.95685	0.396821	4.93175	8.15e-07	9.86e-06	tmem41b		desc=Transmembrane protein 41B (Xenopus tropicalis)
PMZ_0041943	AMBRA1	scaf_00014	12668491	12703279	531.894	1.62033	0.489069	3.31212	0.000925908	0.00422003	AMBRA1		desc=Activating molecule in BECN1-regulated autophagy protein 1 (Homo sapiens)	GO:0005515
PMZ_0041948	SLC13A1	scaf_00014	13395127	13423794	262.177	1.33727	0.40159	3.33215	0.000861789	0.00396876	SLC13A1		desc=Solute carrier family 13 member 1 (Homo sapiens)	GO:0005215,GO:0006814,GO:0016020,GO:0055085
PMZ_0041957		scaf_00014	14063298	14066071	398.06	6.50685	0.979826	6.58191	4.64e-11	1.97e-09
PMZ_0041961	PRRG4	scaf_00014	14618068	14626720	409.727	3.08489	0.621768	4.97138	6.65e-07	8.25e-06	PRRG4		desc=Transmembrane gamma-carboxyglutamic acid protein 4 (Homo sapiens)	GO:0005509,GO:0005576
PMZ_0041970	Tm7sf3	scaf_00014	15510029	15520216	933.822	4.6437	0.614808	7.55253	4.27e-14	3.56e-12	Tm7sf3		desc=Transmembrane 7 superfamily member 3 (Mus musculus)
PMZ_0042008	EUs4	scaf_00036	2864072	2875406	151.806	4.56458	0.96851	4.69198	2.71e-06	2.84e-05	EUs4		desc=Glycoprotein gp2 (Equine herpesvirus 1 (strain Ab4p))
PMZ_0042009		scaf_00036	2893078	2897508	30.9582	4.90466	0.95727	5.01106	5.41e-07	6.94e-06
PMZ_0042011	Sprtn	scaf_00036	3060812	3061159	157.258	2.16746	0.474733	4.56179	5.07e-06	4.89e-05	Sprtn	SPRTN	desc=SprT-like domain-containing protein Spartan (Rattus norvegicus)		GO:0005694
PMZ_0042016	CAPN9	scaf_00036	3131688	3161630	53.1385	3.63219	1.10093	3.28961	0.00100325	0.00452474	CAPN9	CAN9	desc=Calpain-9 (Homo sapiens)	GO:0004198,GO:0005509,GO:0005622,GO:0006508,GO:0007586	GO:0005737
PMZ_0042029	CCDC177	scaf_00036	4829348	4831398	190.714	2.93632	0.660299	4.43652	9.14e-06	8.14e-05	CCDC177	CC177	desc=Coiled-coil domain-containing protein 177 (Homo sapiens)
PMZ_0042033		scaf_00036	5299450	5300292	68.6746	2.04132	0.659003	3.0973	0.00195291	0.00788677		SRTD2			GO:0005737
PMZ_0042051	MSH2	scaf_00036	7059355	7073538	1356.14	1.58957	0.355474	4.47189	7.75e-06	7.05e-05	MSH2	MSH2	desc=DNA mismatch repair protein Msh2 (Chlorocebus aethiops)	GO:0005524,GO:0006298,GO:0030983	GO:0032301
PMZ_0042053	CNRIP1	scaf_00036	7143786	7158756	25.6981	2.93216	0.945194	3.08798	0.00201521	0.00809089	CNRIP1	CNRP1	desc=CB1 cannabinoid receptor-interacting protein 1 (Homo sapiens)
PMZ_0042055	CEBPZ	scaf_00036	7304182	7308777	1102.03	1.56948	0.508501	3.08663	0.00202441	0.00811778	CEBPZ	CEBPZ	desc=CCAAT/enhancer-binding protein zeta (Homo sapiens)	GO:0005488	GO:0005634
PMZ_0042075		scaf_00036	10540932	10562140	371.246	6.55161	0.810426	8.02335	1.03e-15	1.19e-13
PMZ_0042079	SYT14	scaf_00036	10923462	10943587	49.8588	3.09849	0.820694	3.76755	0.000164855	0.000974828	SYT14	SYT14	desc=Synaptotagmin-14 (Homo sapiens)		GO:0016021
PMZ_0042084	COG2	scaf_00036	11123536	11135632	1072.39	1.50706	0.433591	3.47359	0.000513548	0.00255721	COG2	COG2	desc=Conserved oligomeric Golgi complex subunit 2 (Homo sapiens)	GO:0007030,GO:0015031,GO:0016020	GO:0005829
PMZ_0042090	Stxbp6	scaf_00036	11333819	11343729	556.441	2.14619	0.414193	5.17864	2.24e-07	3.26e-06	Stxbp6	STXB6	desc=Syntaxin-binding protein 6 (Mus musculus)	GO:0016021,GO:0016192	GO:0005737
PMZ_0042092	Nsl1	scaf_00036	11473217	11491255	2972.03	1.2731	0.347737	3.65729	0.000254894	0.00141507	Nsl1	NSL1	desc=Kinetochore-associated protein NSL1 homolog (Mus musculus)		GO:0000444
PMZ_0042111	DUS3L	scaf_00010	2012602	2022087	461.373	3.01033	0.548145	5.48827	4.06e-08	7.52e-07	DUS3L	DUS3L	desc=tRNA-dihydrouridine(47) synthase [NAD(P)(+)]-like (Homo sapiens)	GO:0046872	GO:0050660
PMZ_0042121	RNF224	scaf_00010	4469241	4480216	19.4804	3.01167	0.907818	3.29228	0.000993788	0.00448625	RNF224		desc=RING finger protein 224 (Homo sapiens)	GO:0005515,GO:0008270,GO:0046872
PMZ_0042125	ATXN7L1	scaf_00010	5558807	5578299	683.187	2.5986	0.428918	6.05515	1.4e-09	3.89e-08	ATXN7L1	AT7L1	desc=Ataxin-7-like protein 1 (Homo sapiens)	GO:0000226,GO:0006357,GO:0030914
PMZ_0042130	tmem168	scaf_00010	6073958	6080398	657.502	2.7266	0.620949	4.38546	1.16e-05	9.97e-05	tmem168	TM168	desc=Transmembrane protein 168 (Xenopus laevis)		GO:0016021
PMZ_0042134	gpr173	scaf_00010	6148620	6150395	439.109	2.11538	0.514834	4.10806	3.99e-05	0.000290504	gpr173	GP173	desc=Probable G-protein coupled receptor 173 (Danio rerio)	GO:0004930,GO:0007186,GO:0016021	GO:0016021
PMZ_0042155	ARF4	scaf_00010	11013968	11027513	2078.87	2.27667	0.696184	3.26846	0.00108136	0.00482106	ARF4	ARF4	desc=ADP-ribosylation factor 4 (Bos taurus)	GO:0005525,GO:0005622,GO:0007264	GO:0005794
PMZ_0042157	Slmap	scaf_00010	11138041	11156623	112.193	1.70903	0.537721	3.17879	0.0014789	0.00627791	Slmap	SLMAP	desc=Sarcolemmal membrane-associated protein (Mus musculus)	GO:0005515,GO:0006936	GO:0005737
PMZ_0042171	CDK17	scaf_00010	14266365	14304829	110.392	2.15667	0.679459	3.17528	0.0014969	0.00633768	CDK17	CDK17	desc=Cyclin-dependent kinase 17 (Homo sapiens)		GO:0005524
PMZ_0042193	Trim7	scaf_00008	78884	94885	173.128	2.6053	0.53496	4.86926	1.12e-06	1.31e-05	Trim7	RN135/TRIM8	desc=Tripartite motif-containing protein 7 (Mus musculus)	GO:0005515,GO:0005622,GO:0008270,GO:0046872	GO:0005737
PMZ_0042236	SRD5A1	scaf_00008	5813595	5822533	92.2653	1.78772	0.40809	4.38088	1.18e-05	0.000101638	SRD5A1	S5A1	desc=3-oxo-5-alpha-steroid 4-dehydrogenase 1 (Bos taurus)	GO:0005737,GO:0006629,GO:0016021,GO:0016627	GO:0005789
PMZ_0042239	SLC7A5	scaf_00008	5974262	5986363	709.263	3.04618	0.542312	5.61716	1.94e-08	3.91e-07	SLC7A5	LAT1	desc=Large neutral amino acids transporter small subunit 1 (Homo sapiens)	GO:0003333,GO:0015171,GO:0016020	GO:0016324
PMZ_0042240	Slc7a5	scaf_00008	6004121	6026234	733.359	2.23374	0.44365	5.03797	4.7e-07	6.18e-06	Slc7a5	LAT1	desc=Large neutral amino acids transporter small subunit 1 (Rattus norvegicus)	GO:0003333,GO:0015171,GO:0016020	GO:0016324
PMZ_0042255	katnb1	scaf_00008	9986113	10039032	1900.13	1.66743	0.548028	3.03494	0.0024058	0.00934654	katnb1	KTNB1	desc=Katanin p80 WD40 repeat-containing subunit B1 (Xenopus laevis)	GO:0005515,GO:0008017,GO:0008352,GO:0051013	GO:0005813
PMZ_0042257	WDR59	scaf_00008	10049166	10066721	1009.22	2.08252	0.408263	5.09722	3.45e-07	4.73e-06	WDR59	WDR59	desc=WD repeat-containing protein 59 (Homo sapiens)
PMZ_0042259	WDR59	scaf_00008	10107242	10128021	658.568	2.29387	0.485603	4.71904	2.37e-06	2.53e-05	WDR59	WDR59	desc=WD repeat-containing protein 59 (Gallus gallus)	GO:0005515
PMZ_0042260	HSPA5	scaf_00008	10129193	10141540	941.105	1.68183	0.41934	4.01133	6.04e-05	0.000412243	HSPA5	HSP13	desc=78 kDa glucose-regulated protein (Spermophilus tridecemlineatus)		GO:0005783
PMZ_0042283		scaf_00008	14100988	14103115	48.6331	4.20421	0.82234	5.07163	3.94e-07	5.28e-06
PMZ_0042291		scaf_00008	14649800	14650491	3818.78	5.04771	1.11585	4.48117	7.42e-06	6.8e-05
PMZ_0042297	Dus2	scaf_00008	14869726	14876837	107.407	2.67045	0.763088	3.493	0.000477623	0.00240607	Dus2	DUS2L	desc=tRNA-dihydrouridine(20) synthase [NAD(P)+]-like (Mus musculus)	GO:0003824,GO:0008033,GO:0017150,GO:0050660,GO:0055114	GO:0005783
PMZ_0042302	VPS4B	scaf_00008	16117722	16146036	3477.76	2.47409	0.434726	5.69413	1.24e-08	2.66e-07	VPS4B	VPS4A	desc=Vacuolar protein sorting-associated protein 4B (Homo sapiens)	GO:0005524	GO:0005737
PMZ_0042315	DEDD	scaf_00008	17657911	17668560	639.647	2.54939	0.627886	4.05695	4.97e-05	0.00035048	DEDD	DEDD	desc=Death effector domain-containing protein (Homo sapiens)		GO:0005737
PMZ_0042320	setd6	scaf_00008	18214104	18223574	1033.23	2.63779	0.581147	4.53976	5.63e-06	5.36e-05	setd6	SETD6	desc=N-lysine methyltransferase setd6 (Salmo salar)		GO:0005634
PMZ_0042324	ZAN	scaf_00008	18446459	18447278	9.81071	4.10388	1.22518	3.26461	0.00109614	0.00487068	ZAN	ZAN	desc=Zonadhesin (Sus scrofa)		GO:0016021
PMZ_0042335	TSC2	scaf_00024	1866661	1889691	5085.99	2.28452	0.543701	4.20392	2.62e-05	0.00020326	TSC2	TSC2	desc=Tuberin (Homo sapiens)	GO:0005096,GO:0032007,GO:0033596,GO:0043547,GO:0051056	GO:0005901
PMZ_0042346	TMED5	scaf_00024	3301945	3305990	173.791	2.84917	0.449955	6.33039	2.45e-10	8.44e-09	TMED5	TMED1	desc=Transmembrane emp24 domain-containing protein 5 (Bos taurus)	GO:0006810,GO:0016021	GO:0005789
PMZ_0042347	mapkap1	scaf_00024	3539830	3581649	115.629	2.74064	0.610855	4.48148	7.41e-06	6.8e-05	mapkap1	SIN1	desc=Target of rapamycin complex 2 subunit MAPKAP1 (Xenopus laevis)
PMZ_0042348	MAPKAP1	scaf_00024	3589243	3590114	11.7106	4.30289	1.04363	3.98783	6.67e-05	0.000450224	MAPKAP1	SIN1	desc=Target of rapamycin complex 2 subunit MAPKAP1 (Gallus gallus)		GO:0005794
PMZ_0042349	MAPKAP1	scaf_00024	3631826	3639790	741.97	6.36948	0.623957	10.1831	2.36e-24	1.35e-21	MAPKAP1	SIN1	desc=Target of rapamycin complex 2 subunit MAPKAP1 (Gallus gallus)		GO:0016023
PMZ_0042350	MVB12B	scaf_00024	4013953	4016091	85.2049	1.95079	0.587338	3.31922	0.000902695	0.00412585	MVB12B	MB12B	desc=Multivesicular body subunit 12B (Homo sapiens)		GO:0005829
PMZ_0042361	uck2	scaf_00024	5768824	5796915	1386.49	2.34328	0.61876	3.7835	0.00015464	0.00092342	uck2	UCK2	desc=Uridine-cytidine kinase 2 (Xenopus tropicalis)	GO:0005524,GO:0006238,GO:0008152,GO:0016301,GO:0019206,GO:0044206	GO:0005524
PMZ_0042364	Fbxw2	scaf_00024	6011218	6011490	326.804	2.4828	0.632692	3.91799	8.93e-05	0.000580477	Fbxw2	FBXW2	desc=F-box/WD repeat-containing protein 2 (Mus musculus)	GO:0005515	GO:0005737
PMZ_0042365	HDDC2	scaf_00024	6793378	6802100	1295.02	2.17085	0.467977	4.63464	3.58e-06	3.63e-05	HDDC2	HDDC2	desc=HD domain-containing protein 2 (Homo sapiens)
PMZ_0042370	RALGPS2	scaf_00024	7286747	7309660	56.159	4.07426	0.845491	4.79235	1.65e-06	1.84e-05	RALGPS2	RGPS1	desc=Ras-specific guanine nucleotide-releasing factor RalGPS2 (Macaca fascicularis)		GO:0005737
PMZ_0042378	Fmo5	scaf_00024	9103289	9120104	323.711	2.45327	0.77807	3.1579	0.00158912	0.00664587	Fmo5	FMO5	desc=Dimethylaniline monooxygenase [N-oxide-forming] 5 (Mus musculus)	GO:0004499,GO:0050660,GO:0050661,GO:0055114	GO:0005789
PMZ_0042379	DNM3	scaf_00024	9124334	9174788	2463.2	1.41228	0.438948	3.2189	0.00128683	0.00557196	DNM3	DYN1	desc=Dynamin-3 (Homo sapiens)	GO:0003924,GO:0005525,GO:0072583	GO:0042584
PMZ_0042386	BRINP1	scaf_00024	9839007	9869583	406.439	3.41227	0.7346	4.64693	3.37e-06	3.46e-05	BRINP1	BRNP3	desc=BMP/retinoic acid-inducible neural-specific protein 1 (Gallus gallus)		GO:0030425
PMZ_0042395		scaf_00024	11027345	11038986	209.479	1.88904	0.521236	3.62242	0.000291854	0.00158309		TYW3			GO:0008168
PMZ_0042398	St6galnac3	scaf_00024	11184691	11192344	65.367	2.67466	0.715168	3.73704	0.000186196	0.00108095	St6galnac3	SIA7C	desc=Alpha-N-acetylgalactosaminide alpha-2%2C6-sialyltransferase 3 (Mus musculus)	GO:0006486,GO:0008373	GO:0000139
PMZ_0042407	St6galnac3	scaf_00024	11877102	11881317	63.4165	2.82484	0.722183	3.90477	9.43e-05	0.000607443	St6galnac3	SIA7C	desc=Alpha-N-acetylgalactosaminide alpha-2%2C6-sialyltransferase 3 (Mus musculus)	GO:0006486,GO:0008373	GO:0000139
PMZ_0042422	Znf775	scaf_00024	14071899	14074892	140.678	1.49943	0.479582	3.12722	0.00176471	0.0072503	Znf775	Z780A/ZNF19	desc=Zinc finger protein 775 (Mus musculus)	GO:0003676,GO:0046872	GO:0005634
PMZ_0042423	Znf787	scaf_00024	14075492	14075875	137.58	2.1247	0.527586	4.02873	5.61e-05	0.000387382	Znf787	ZN479	desc=Zinc finger protein 787 (Mus musculus)	GO:0003676,GO:0046872	GO:0005634
PMZ_0042431		scaf_00018	261352	282912	537.571	2.7039	0.788711	3.41488	0.000638097	0.00307951		RAB28	Note=Protein of unknown function	GO:0003677
PMZ_0042438	CDC25A	scaf_00018	926909	941245	1166.86	3.68796	0.527677	6.98811	2.79e-12	1.64e-10	CDC25A	MPI1B	desc=M-phase inducer phosphatase 1 (Homo sapiens)	GO:0000087,GO:0004725,GO:0005622,GO:0006470	GO:0005622
PMZ_0042457	ADRA2C	scaf_00018	2156016	2158168	27.0335	3.64277	0.980378	3.68709	0.000226837	0.00127941	ADRA2C	ADA2C	desc=Alpha-2C adrenergic receptor (Didelphis virginiana)	GO:0004930,GO:0004938,GO:0006940,GO:0007186,GO:0016021,GO:0019229,GO:0030168	GO:0016021
PMZ_0042490	ykt6	scaf_00018	6442937	6450044	1053.48	2.55592	0.572421	4.4692	7.85e-06	7.12e-05	ykt6	YKT6	desc=Synaptobrevin homolog YKT6 (Danio rerio)	GO:0016021,GO:0016192	GO:0030659
PMZ_0042492	Rnf24	scaf_00018	6509125	6528989	158.892	2.65676	0.592893	4.47818	7.53e-06	6.88e-05	Rnf24	RNF24	desc=RING finger protein 24 (Mus musculus)	GO:0005515,GO:0008270	GO:0000139
PMZ_0042499	RAB11FIP2	scaf_00018	7271316	7300401	1951.97	1.693	0.397062	4.26276	2.02e-05	0.000161609	RAB11FIP2	RFIP2	desc=Rab11 family-interacting protein 2 (Homo sapiens)	GO:0005515	GO:0030659
PMZ_0042501	lce	scaf_00018	7484526	7498331	2749.84	6.4782	0.882637	7.32127	2.46e-13	1.83e-11	lce	LCE	desc=Low choriolytic enzyme (Oryzias latipes)	GO:0004222,GO:0006508,GO:0008237,GO:0008270,GO:0016020	GO:0030133
PMZ_0042505	MYOF	scaf_00018	7650391	7739533	3142.69	1.94304	0.487896	3.98649	6.71e-05	0.000452269	MYOF	MYOF	desc=Myoferlin (Homo sapiens)	GO:0005515,GO:0007520,GO:0016021	GO:0005901
PMZ_0042515	2020-03-04	scaf_00018	8972393	8983018	87.8356	2.70852	0.513521	5.26572	1.4e-07	2.19e-06	2020-03-05	MARH5	desc=E3 ubiquitin-protein ligase MARCH5 (Gallus gallus)	GO:0008270	GO:0005783
PMZ_0042527	Ppp2r2a	scaf_00018	12423032	12470198	1200.35	1.88507	0.444538	4.2405	2.23e-05	0.000176537	Ppp2r2a	2ABG/2ABA	desc=Serine/threonine-protein phosphatase 2A 55 kDa regulatory subunit B alpha isoform (Rattus norvegicus)	GO:0000159,GO:0005515,GO:0007165,GO:0008601	GO:0000159
PMZ_0042536	Crtac1	scaf_00018	14170423	14171859	18.0613	3.18877	0.935833	3.3773	0.000732021	0.00346817	Crtac1		desc=Cartilage acidic protein 1 (Mus musculus)
PMZ_0042542	INO80B	scaf_00018	14760309	14793183	1086.25	1.75692	0.459422	3.82617	0.000130154	0.000798059	INO80B	IN80B	desc=INO80 complex subunit B (Homo sapiens)	GO:0006338,GO:0006355,GO:0031011	GO:0031011
PMZ_0042560	Fut8	scaf_00029	905209	932858	649.719	1.93539	0.441074	4.39038	1.13e-05	9.79e-05	Fut8	FUT8	desc=Alpha-(1%2C6)-fucosyltransferase (Rattus norvegicus)	GO:0005515	GO:0032580
PMZ_0042569	Atp6v0a1	scaf_00029	1572449	1599395	687.483	2.57366	0.475804	5.4065	6.43e-08	1.12e-06	Atp6v0a1	VPP1	desc=V-type proton ATPase 116 kDa subunit a isoform 1 (Mus musculus)	GO:0015078,GO:0015991,GO:0033179	GO:0005737
PMZ_0042591	TMEM179B	scaf_00029	3664299	3675552	160.181	1.65379	0.539561	3.06461	0.00217957	0.00862284	TMEM179B	T179B	desc=Transmembrane protein 179B (Homo sapiens)		GO:0016021
PMZ_0042598	si:dkey	scaf_00029	5503712	5509838	366.215	2.40571	0.463725	5.18659	2.14e-07	3.16e-06	si:dkey	NEPRO	desc=Uncharacterized protein C3orf17 homolog (Danio rerio)
PMZ_0042604	mig	scaf_00029	5576153	5595843	3683.77	2.29525	0.586202	3.91179	9.16e-05	0.000592225	mig	PPN1	desc=Papilin (Caenorhabditis elegans)	GO:0004867	GO:0005604
PMZ_0042606		scaf_00029	5761242	5767252	903.321	3.45089	0.638572	5.41492	6.13e-08	1.07e-06
PMZ_0042608	NKPD1	scaf_00029	6201736	6211412	164.349	4.15489	0.58878	7.04509	1.85e-12	1.14e-10	NKPD1	NKPD1	desc=NTPase KAP family P-loop domain-containing protein 1 (Homo sapiens)		GO:0016021
PMZ_0042620	LGALS3	scaf_00029	7910816	7914809	2310.79	5.04414	1.00006	5.02382	5.07e-07	6.55e-06	LGALS3	LEC1	desc=Galectin-3 (Cricetulus longicaudatus)	GO:0030246	GO:0060102
PMZ_0042622	EML5	scaf_00029	8212843	8322893	381.214	3.21566	0.731313	4.39521	1.11e-05	9.6e-05	EML5	EMAL6	desc=Echinoderm microtubule-associated protein-like 5 (Homo sapiens)	GO:0004198,GO:0005509,GO:0005515,GO:0005622,GO:0006508	GO:0005737
PMZ_0042624	EML6	scaf_00029	8477053	8483865	5.07464	4.69083	1.46958	3.04162	0.00235311	0.00917488	EML6	EMAL6	desc=Echinoderm microtubule-associated protein-like 6 (Homo sapiens)		GO:0005737
PMZ_0042628		scaf_00029	9739361	9763529	88.6493	3.91813	1.11781	3.48018	0.000501077	0.00250551		VIT	Note=Similar to Vitellogenin (Ichthyomyzon unicuspis)	GO:0005319,GO:0006869	GO:0005319
PMZ_0042633	LD	scaf_00029	10075757	10110837	557.107	2.31341	0.624485	3.71152	0.000206016	0.00117886	LD	FMN2	desc=Formin (Gallus gallus)		GO:0005938
PMZ_0042634		scaf_00029	10124900	10141508	317.943	3.59487	0.544543	6.60452	3.99e-11	1.72e-09
PMZ_0042640	GGPS1	scaf_00029	10634224	10659691	3038.23	1.65472	0.477179	3.46621	0.000527851	0.00261903	GGPS1	GGPPS/TBCE	desc=Geranylgeranyl pyrophosphate synthase (Bos taurus)	GO:0008299	GO:0005737
PMZ_0042642	KCNK1	scaf_00029	10722214	10728940	513.855	3.8722	0.465218	8.32871	8.17e-17	1.23e-14	KCNK1	KCNK1	desc=Potassium channel subfamily K member 1 (Pongo abelii)	GO:0005267,GO:0016020,GO:0016021,GO:0071805	GO:0016021
PMZ_0042644	SIVA1	scaf_00029	11234559	11237757	367.509	2.56909	0.529391	4.85508	1.2e-06	1.39e-05	SIVA1	SIVA	desc=Apoptosis regulatory protein Siva (Homo sapiens)		GO:0005737
PMZ_0042649	CAPN8	scaf_00029	11901164	11912987	226.514	4.84759	0.687795	7.03572	1.98e-12	1.21e-10	CAPN8	CAN3	desc=Calpain-8 (Homo sapiens)	GO:0004198,GO:0005622,GO:0006508	GO:0005737
PMZ_0042668		scaf_00037	1622951	1642265	379.993	2.20601	0.531159	4.15088	3.31e-05	0.000247443			Note=Protein of unknown function	GO:0003676,GO:0046872
PMZ_0042669	REPIN1	scaf_00037	1662864	1663397	362.478	2.31312	0.43492	5.31998	1.04e-07	1.7e-06	REPIN1	ZN287/ZN479	desc=Replication initiator 1 (Homo sapiens)	GO:0003676,GO:0046872	GO:0005634
PMZ_0042670	ZNF146	scaf_00037	1673836	1679060	663.826	1.12687	0.311594	3.61574	0.000299495	0.00161692	ZNF146	ZFP37	desc=Zinc finger protein OZF (Homo sapiens)	GO:0003676,GO:0046872	GO:0005634
PMZ_0042671	Gga1	scaf_00037	1683123	1703539	1479.54	1.73224	0.510105	3.39301	0.000691297	0.00329694	Gga1	GGA3	desc=ADP-ribosylation factor-binding protein GGA1 (Mus musculus)	GO:0005622,GO:0005802,GO:0006886,GO:0016192,GO:0030131,GO:0030306	GO:0030131
PMZ_0042684	FAM83G	scaf_00037	3236004	3244452	56.6139	4.23943	0.619889	6.80001	1.05e-11	5.21e-10	FAM83G	FA83G/FA83D	desc=Protein FAM83G (Homo sapiens)		GO:0005737
PMZ_0042687	kpna1	scaf_00037	3282790	3291007	10543.8	7.73273	0.807539	9.55608	1.22e-21	4.1e-19	kpna1	IMA1	desc=Importin subunit alpha-5 (Xenopus laevis)	GO:0005488,GO:0005515,GO:0005634,GO:0005737,GO:0006606,GO:0008565	GO:0005737
PMZ_0042704	LRRC45	scaf_00037	5093424	5109654	524.91	1.49536	0.457438	3.26335	0.00110105	0.00488642	LRRC45	LRC45	desc=Leucine-rich repeat-containing protein 45 (Homo sapiens)		GO:0005813
PMZ_0042706	GNG13	scaf_00037	5181163	5188452	9.15407	2.92238	0.944291	3.04286	0.00234344	0.00915002	GNG13	GBG13	desc=Guanine nucleotide-binding protein G(I)/G(S)/G(O) subunit gamma-13 (Homo sapiens)	GO:0004871,GO:0005834,GO:0007186	GO:0005834
PMZ_0042724	Mchr1	scaf_00037	8522734	8584451	75.0634	1.39845	0.428352	3.26476	0.00109557	0.00486991	Mchr1	MCHR1	desc=Melanin-concentrating hormone receptor 1 (Fragment) (Rattus norvegicus)	GO:0004930,GO:0007186,GO:0007218,GO:0016021,GO:0030273	GO:0016021
PMZ_0042729	ADAP1	scaf_00037	9802147	9853000	567.632	1.92285	0.621589	3.09138	0.00199227	0.0080074	ADAP1	ADAP1	desc=Arf-GAP with dual PH domain-containing protein 1 (Homo sapiens)	GO:0005096	GO:0005737
PMZ_0042730	tefm	scaf_00037	9859935	9866343	862.062	1.76115	0.569074	3.09514	0.00196718	0.00793615	tefm	TEFM	desc=Transcription elongation factor%2C mitochondrial (Danio rerio)		GO:0005759
PMZ_0042732		scaf_00037	10115321	10115668	39.9197	4.95963	0.860722	5.66323	1.49e-08	3.12e-07			Note=Protein of unknown function
PMZ_0042734	Sun1	scaf_00037	10461074	10462050	33.6035	2.91881	0.798911	3.62993	0.000283493	0.0015434	Sun1		desc=SUN domain-containing protein 1 (Mus musculus)	GO:0005639,GO:0034993
PMZ_0042740	tom1l2	scaf_00037	11275374	11336026	3090.15	1.53039	0.442249	3.46362	0.000532962	0.00264102	tom1l2	TM1L2	desc=TOM1-like protein 2 (Xenopus laevis)	GO:0005622,GO:0006886	GO:0070062
PMZ_0042745	PAQR4	scaf_00038	788995	799424	443.143	2.31034	0.498543	4.63444	3.58e-06	3.64e-05	PAQR4	PAQR4	desc=Progestin and adipoQ receptor family member 4 (Homo sapiens)	GO:0016021	GO:0016021
PMZ_0042755	PQLC2	scaf_00038	2466219	2473962	378.125	2.67247	0.603639	4.42136	9.81e-06	8.64e-05	PQLC2	LAAT1	desc=Lysosomal amino acid transporter 1 homolog (Homo sapiens)		GO:0031301
PMZ_0042762	HSD3B7	scaf_00038	2761904	2766869	229.515	3.62584	0.707298	5.12404	2.99e-07	4.2e-06	HSD3B7	3BHS7	desc=3 beta-hydroxysteroid dehydrogenase type 7 (Homo sapiens)	GO:0003854,GO:0006694,GO:0016616,GO:0055114	GO:0005789
PMZ_0042764	NFATC2IP	scaf_00038	3010599	3021540	805.085	2.39714	0.497127	4.81546	1.47e-06	1.67e-05	NFATC2IP	NF2IP	desc=NFATC2-interacting protein (Macaca fascicularis)		GO:0005737
PMZ_0042766	CUX1	scaf_00038	3172657	3189350	2265.13	1.47559	0.302585	4.87524	1.09e-06	1.28e-05	CUX1	CASP	desc=Protein CASP (Homo sapiens)	GO:0006891,GO:0030173	GO:0030173
PMZ_0042790	YPEL1	scaf_00038	6323374	6325875	64.9287	2.07798	0.654951	3.1731	0.00150819	0.00637158	YPEL1	YPEL1	desc=Protein yippee-like 1 (Chlorocebus aethiops)		GO:0005634
PMZ_0042793	Ap1b1	scaf_00038	6590826	6602449	670.386	1.92421	0.545735	3.52574	0.000422294	0.00216268	Ap1b1	AP1B1	desc=AP-1 complex subunit beta-1 (Mus musculus)	GO:0005488,GO:0006886,GO:0016192,GO:0030117	GO:0030131
PMZ_0042803	tsr1	scaf_00038	7710311	7727526	1445.26	1.50962	0.42167	3.58127	0.000341927	0.0018093	tsr1	TSR1	desc=Pre-rRNA-processing protein TSR1 homolog (Xenopus laevis)	GO:0005634,GO:0042254	GO:0005730
PMZ_0042804	Dtx4	scaf_00038	7732215	7733733	203.48	3.08943	0.761935	4.04461	5.24e-05	0.000366349	Dtx4	DTX1	desc=E3 ubiquitin-protein ligase DTX4 (Mus musculus)	GO:0008270	GO:0005737
PMZ_0042822	GSTT1	scaf_00038	8900352	8914407	163.126	1.93967	0.531062	3.65592	0.00025626	0.00142143	GSTT1	GSTT1	desc=Glutathione S-transferase theta-1 (Gallus gallus)		GO:0005737
PMZ_0042826	Hps4	scaf_00038	9187443	9220936	644.945	3.19636	0.525469	6.07959	1.2e-09	3.4e-08	Hps4	HPS4	desc=Hermansky-Pudlak syndrome 4 protein homolog (Mus musculus)		GO:0031085
PMZ_0042830	KCTD10	scaf_00038	9721574	9728424	586.823	2.72839	0.561082	4.85971	1.18e-06	1.36e-05	KCTD10	BACD3	desc=BTB/POZ domain-containing adapter for CUL3-mediated RhoA degradation protein 3 (Homo sapiens)	GO:0051260	GO:0031463
PMZ_0042834	Poldip2	scaf_00038	10065496	10089860	2381.6	2.95793	0.588996	5.02171	5.12e-07	6.59e-06	Poldip2	PDIP2	desc=Polymerase delta-interacting protein 2 (Mus musculus)	GO:0003677	GO:0042645
PMZ_0042836	Trim37	scaf_00038	10132278	10164927	4233.56	2.65959	0.555244	4.7829	1.73e-06	1.92e-05	Trim37	TRI37	desc=E3 ubiquitin-protein ligase TRIM37 (Mus musculus)		GO:0016235
PMZ_0042841	VPS9D1	scaf_00038	10369695	10392930	347.333	2.04507	0.594144	3.44182	0.00057782	0.00283295	VPS9D1	VP9D1	desc=VPS9 domain-containing protein 1 (Homo sapiens)		GO:0005096
PMZ_0042842	DGCR6	scaf_00038	10431994	10451063	1700.78	1.53185	0.364524	4.20055	2.66e-05	0.000205736	DGCR6	DGCR6	desc=Protein DGCR6 (Gallus gallus)	GO:0051259
PMZ_0042851	MED13	scaf_00038	10898910	10940324	2110.69	1.44971	0.478001	3.03133	0.00243479	0.00943623	MED13	MED13	desc=Mediator of RNA polymerase II transcription subunit 13 (Homo sapiens)	GO:0001104,GO:0006357,GO:0016592	GO:0016592
PMZ_0042860	DDB2	scaf_00026	599765	610700	432.869	2.06763	0.596141	3.46942	0.000521583	0.00259124	DDB2		desc=DNA damage-binding protein 2 (Gallus gallus)	GO:0005515
PMZ_0042869	Fry	scaf_00026	3225065	3271122	108.977	2.07734	0.578196	3.59589	0.000323282	0.00172521	Fry		desc=Protein furry homolog (Mus musculus)
PMZ_0042875	SCFD2	scaf_00026	3859854	3869918	136.604	1.34096	0.423288	3.1672	0.00153914	0.0064756	SCFD2		desc=Sec1 family domain-containing protein 2 (Homo sapiens)
PMZ_0042876		scaf_00026	3908045	3910509	104.138	1.35262	0.44158	3.06101	0.00220588	0.00870743
PMZ_0042877	Scfd2	scaf_00026	3963135	3984498	309.301	2.0394	0.411374	4.95408	7.27e-07	8.91e-06	Scfd2		desc=Sec1 family domain-containing protein 2 (Mus musculus)	GO:0006904,GO:0016192
PMZ_0042887	ALG5	scaf_00026	4801418	4832775	630.111	2.29512	0.46211	4.96768	6.78e-07	8.38e-06	ALG5		desc=Dolichyl-phosphate beta-glucosyltransferase (Homo sapiens)
PMZ_0042891	ANAPC10	scaf_00026	4949888	4963378	340.788	2.71207	0.513179	5.28187	1.28e-07	2.03e-06	ANAPC10		desc=Anaphase-promoting complex subunit 10 (Homo sapiens)
PMZ_0042892	ANAPC10	scaf_00026	4980622	4990711	212.51	2.74057	0.344444	7.95171	1.84e-15	2.03e-13	ANAPC10		desc=Anaphase-promoting complex subunit 10 (Bos taurus)
PMZ_0042918	cep44	scaf_00026	8783224	8800733	999.242	2.37448	0.55888	4.23855	2.25e-05	0.000177712	cep44		desc=Centrosomal protein of 44 kDa (Xenopus tropicalis)
PMZ_0042939	GM2A	scaf_00026	12106653	12113623	4218.01	2.67406	0.40012	6.68758	2.27e-11	1.02e-09	GM2A		desc=Ganglioside GM2 activator (Macaca fascicularis)	GO:0006689,GO:0008047
PMZ_0042945	Paics	scaf_00026	12267243	12279429	1828.43	2.04474	0.544074	3.7594	0.000170323	0.00100319	Paics		desc=Multifunctional protein ADE2 (Rattus norvegicus)	GO:0004639,GO:0005524,GO:0006164,GO:0006189
PMZ_0042948		scaf_00026	12794161	12797185	94.5249	1.78764	0.456973	3.91054	9.21e-05	0.000595021			Note=Protein of unknown function	GO:0005634,GO:0005737,GO:0006606,GO:0008565
PMZ_0042951	wdr55	scaf_00026	12864690	12886287	377.964	1.40706	0.434501	3.2414	0.00118943	0.00521785	wdr55		desc=WD repeat-containing protein 55 (Danio rerio)	GO:0005515
PMZ_0042963	Nipa2	scaf_00026	13664778	13673110	1351.45	4.31408	0.678266	6.36376	1.97e-10	6.9e-09	Nipa2		desc=Magnesium transporter NIPA2 (Mus musculus)	GO:0015095,GO:0015693,GO:0016021
PMZ_0042977	ccdc61	scaf_00025	1494482	1499095	192.318	2.3206	0.458154	5.06137	4.16e-07	5.55e-06	ccdc61	CCD61	desc=Coiled-coil domain-containing protein 61 (Danio rerio)
PMZ_0042978	PIGH	scaf_00025	1507210	1513233	216.502	1.46147	0.449575	3.2521	0.00114554	0.00504241	PIGH	PIGH	desc=Phosphatidylinositol N-acetylglucosaminyltransferase subunit H (Homo sapiens)	GO:0017176	GO:0005783
PMZ_0042985	Chac1	scaf_00025	2070452	2074967	653.726	3.55926	0.566785	6.28652	3.25e-10	1.09e-08	Chac1	CHAC1	desc=Glutathione-specific gamma-glutamylcyclotransferase 1 (Mus musculus)		GO:0005829
PMZ_0042986	abcB1	scaf_00025	2128829	2141632	334.086	2.16696	0.364201	5.95744	2.56e-09	6.63e-08	abcB1	ABCB1	desc=ABC transporter B family member 1 (Dictyostelium discoideum)	GO:0005524,GO:0016887	GO:0043190
PMZ_0042988		scaf_00025	2217671	2240804	1124.56	1.44161	0.427787	3.36997	0.000751754	0.00355127		S39AD
PMZ_0042992	PITHD1	scaf_00025	2666109	2679106	1100.86	2.59157	0.338055	7.66368	1.81e-14	1.62e-12	PITHD1	PITH1	desc=PITH domain-containing protein 1 (Homo sapiens)
PMZ_0043028	mnat1	scaf_00025	6469746	6476488	400.175	1.56906	0.460988	3.40432	0.000663289	0.00318369	mnat1	MAT1	desc=CDK-activating kinase assembly factor MAT1 (Xenopus laevis)	GO:0005634,GO:0007049	GO:0005634
PMZ_0043038		scaf_00025	7653468	7659334	29.4014	6.8855	1.10008	5.86275	4.55e-09	1.09e-07			Note=Protein of unknown function	GO:0003677
PMZ_0043043	Gpha2	scaf_00025	8377978	8380481	454.256	5.38032	0.894838	5.99339	2.06e-09	5.51e-08	Gpha2	GPHA2	desc=Glycoprotein hormone alpha-2 (Mus musculus)	GO:0005179,GO:0005576	GO:0005576
PMZ_0043044	INTS7	scaf_00025	8402841	8425843	1492.73	1.91972	0.49658	3.86292	0.000112041	0.000704646	INTS7	INT7	desc=Integrator complex subunit 7 (Bos taurus)	GO:0005488	GO:0005694
PMZ_0043045	TDRD9	scaf_00025	8486931	8512538	464.549	2.33004	0.567839	4.0991	4.15e-05	0.000300401	TDRD9	TDRD9	desc=Putative ATP-dependent RNA helicase TDRD9 (Homo sapiens)		GO:0005634
PMZ_0043062	OPN3	scaf_00025	11802234	11817685	46.7356	5.29412	1.09005	4.73032	2.24e-06	2.41e-05	OPN3	OPN3	desc=Opsin-3 (Homo sapiens)	GO:0004930,GO:0007186,GO:0007601,GO:0016021	GO:0016021
PMZ_0043081	mtap	scaf_00021	481699	485480	410.943	3.49791	0.545602	6.40807	1.47e-10	5.4e-09	mtap	MTAP	desc=S-methyl-5'-thioadenosine phosphorylase (Xenopus tropicalis)	GO:0003824,GO:0004645,GO:0009116,GO:0016763,GO:0017061	GO:0005737
PMZ_0043090	KIAA1109	scaf_00021	1980848	2014459	515.06	2.98691	0.408904	7.30456	2.78e-13	2.05e-11	KIAA1109	K1109	desc=Uncharacterized protein KIAA1109 (Homo sapiens)		GO:0016021
PMZ_0043106		scaf_00021	3612884	3619522	36.6885	2.73412	0.855735	3.18204	0.00146239	0.00621869			Note=Protein of unknown function
PMZ_0043107		scaf_00021	3624821	3625423	5.33985	4.40647	1.31896	3.33027	0.00086763	0.00399472			Note=Protein of unknown function
PMZ_0043117	Stard10	scaf_00021	5189847	5208509	1856.01	2.35924	0.337181	6.99423	2.67e-12	1.58e-10	Stard10	PCTL	desc=PCTP-like protein (Mus musculus)	GO:0008289	GO:0005829
PMZ_0043125	RAB30	scaf_00021	5860810	5872123	435.82	3.01151	0.579376	5.19253	2.07e-07	3.08e-06	RAB30	RAB30	desc=Ras-related protein Rab-30 (Bos taurus)	GO:0003924,GO:0005525,GO:0005622,GO:0006886,GO:0006913,GO:0007165,GO:0007264,GO:0015031,GO:0016020	GO:0005801
PMZ_0043131	scocb	scaf_00021	6855254	6861339	366.377	1.27161	0.393685	3.22631	0.00125398	0.00545232	scocb	SCOCB	desc=Short coiled-coil protein B (Danio rerio)		GO:0005829
PMZ_0043133		scaf_00021	7401143	7403557	63.3545	3.19309	0.6244	5.11067	3.21e-07	4.46e-06				GO:0003725
PMZ_0043151	Cnot11	scaf_00021	10313762	10323158	808.475	2.17163	0.448232	4.84128	1.29e-06	1.48e-05	Cnot11	CNO11	desc=CCR4-NOT transcription complex subunit 11 (Rattus norvegicus)		GO:0030014
PMZ_0043155		scaf_00021	10465010	10475671	130.224	5.41373	0.85977	6.2431	4.29e-10	1.38e-08			Note=Protein of unknown function
PMZ_0043156	MTUS1	scaf_00021	10481111	10512413	987.048	2.82787	0.50943	5.5645	2.63e-08	5.1e-07	MTUS1	MTUS1	desc=Microtubule-associated tumor suppressor 1 homolog (Bos taurus)		GO:0005694
PMZ_0043162	FIBH	scaf_00021	11604230	11611070	89.3622	1.62661	0.53163	3.05959	0.0022164	0.00874185	FIBH	LONF3	desc=Fibroin heavy chain (Bombyx mori)	GO:0005515,GO:0008270,GO:0046872	GO:0004176
PMZ_0043178	Lingo3	scaf_00021	14224173	14255068	236.601	2.11683	0.597611	3.5412	0.000398306	0.00206001	Lingo3	SLIT2/NIPA1	desc=Leucine-rich repeat and immunoglobulin-like domain-containing nogo receptor-interacting protein 3 (Mus musculus)	GO:0005515,GO:0015095,GO:0015693,GO:0016021	GO:0005769
PMZ_0043185		scaf_00021	14587850	14608024	865.526	4.92742	0.464155	10.6058	2.8e-26	2.27e-23
PMZ_0043201	Uba6	scaf_00031	2187392	2235503	2300.71	1.50655	0.409035	3.6818	0.00023159	0.00130056	Uba6	UBA6	desc=Ubiquitin-like modifier-activating enzyme 6 (Mus musculus)	GO:0005524,GO:0006464,GO:0008641	GO:0005737
PMZ_0043202	cdk7	scaf_00031	2428953	2490746	3662.26	1.47344	0.408621	3.60581	0.000311175	0.00167162	cdk7	CDK7	desc=Cyclin-dependent kinase 7 (Xenopus laevis)	GO:0004672,GO:0005524,GO:0006468,GO:0016021,GO:0016772	GO:0005634
PMZ_0043215	eri2	scaf_00031	3088637	3101851	1039.9	2.68341	0.477342	5.61764	1.94e-08	3.9e-07	eri2	ERI2	desc=ERI1 exoribonuclease 2 (Xenopus laevis)	GO:0003676,GO:0004527	GO:0004527
PMZ_0043217	SH3GL3	scaf_00031	3121243	3189372	838.72	2.13868	0.416342	5.13364	2.84e-07	4.04e-06	SH3GL3	SH3G1	desc=Endophilin-A3 (Homo sapiens)	GO:0005515,GO:0005737,GO:0006897	GO:0030054
PMZ_0043220	TSPAN3	scaf_00031	3438083	3460651	2016.55	1.57425	0.499515	3.15436	0.00160849	0.00671358	TSPAN3	TSN3	desc=Tetraspanin-3 (Bos taurus)	GO:0016021	GO:0070062
PMZ_0043236	slc25a46	scaf_00031	5998125	6008511	346.105	1.56034	0.491364	3.17334	0.00150698	0.00637062	slc25a46	S2546	desc=Solute carrier family 25 member 46 (Danio rerio)		GO:0016021
PMZ_0043238	nxpe3	scaf_00031	6240699	6242360	24.0675	6.44871	1.33103	4.75385	2e-06	2.18e-05	nxpe3	NXPE3	desc=NXPE family member 3 (Danio rerio)		GO:0005576
PMZ_0043253	MCTP1	scaf_00031	9187635	9226308	436.827	1.35632	0.334416	4.06625	4.78e-05	0.000339049	MCTP1	MCTP1	desc=Multiple C2 and transmembrane domain-containing protein 1 (Homo sapiens)	GO:0005515	GO:0016021
PMZ_0043256	Arrdc3	scaf_00031	10042350	10059220	2125.9	2.25524	0.47328	4.76541	1.88e-06	2.07e-05	Arrdc3	ARRD3	desc=Arrestin domain-containing protein 3 (Mus musculus)	GO:0007165	GO:0005737
PMZ_0043257	SLC5A5	scaf_00031	10129055	10140175	963.856	3.66126	0.874392	4.19284	2.75e-05	0.000212096	SLC5A5	SC5A5	desc=Sodium/iodide cotransporter (Homo sapiens)	GO:0005215,GO:0006810,GO:0016020,GO:0055085	GO:0016021
PMZ_0043259	Aqp3	scaf_00031	10706712	10729847	1930.84	4.35529	0.705914	6.18549	6.19e-10	1.92e-08	Aqp3	AQP3	desc=Aquaporin-3 (Mus musculus)	GO:0005215,GO:0006810,GO:0016020	GO:0016323
PMZ_0043260	NKX1	scaf_00031	10751026	10756773	15.2401	3.15263	1.01421	3.08438	0.00203978	0.00816353	NKX1	EMS/AL	desc=NK1 transcription factor-related protein 2 (Homo sapiens)	GO:0003677	GO:0005634
PMZ_0043268	CHDH	scaf_00031	11439891	11476505	2245.31	2.13308	0.417904	5.10475	3.31e-07	4.57e-06	CHDH	BETA	desc=Choline dehydrogenase%2C mitochondrial (Homo sapiens)	GO:0004672,GO:0005524,GO:0006468,GO:0016614,GO:0016772,GO:0050660,GO:0055114	GO:0008802
PMZ_0043272	ppard	scaf_00031	11617464	11635083	434.435	2.37291	0.462347	5.13179	2.87e-07	4.08e-06	ppard	PPARD	desc=Peroxisome proliferator-activated receptor delta (Xenopus laevis)	GO:0003700,GO:0005634,GO:0006355,GO:0008270,GO:0043565	GO:0005634
PMZ_0043273		scaf_00031	11806166	11816193	52.3179	2.41654	0.795402	3.02619	0.00247659	0.00957178		LYSM1
PMZ_0043278	WFDC3	scaf_00031	12281800	12285951	1531.19	4.90796	0.825061	5.95006	2.68e-09	6.84e-08	WFDC3	WFD18	desc=WAP four-disulfide core domain protein 3 (Homo sapiens)	GO:0005576,GO:0030414	GO:0005576
PMZ_0043280	Pitpnc1	scaf_00019	69509	102648	42.4451	1.73507	0.570284	3.04221	0.00234845	0.00916404	Pitpnc1	PITC1	desc=Cytoplasmic phosphatidylinositol transfer protein 1 (Mus musculus)	GO:0005622,GO:0006810	GO:0005737
PMZ_0043285	Atpaf2	scaf_00019	319643	328400	1721.09	1.98763	0.548309	3.62749	0.000286186	0.00155702	Atpaf2	ATPF2	desc=ATP synthase mitochondrial F1 complex assembly factor 2 (Mus musculus)	GO:0043461	GO:0005739
PMZ_0043290	Mief1	scaf_00019	470043	478060	998.26	2.14611	0.50865	4.21773	2.47e-05	0.000192901	Mief1	MID51	desc=Mitochondrial dynamics protein MID51 (Mus musculus)		GO:0016021
PMZ_0043329	Ern1	scaf_00019	4334007	4370310	104.83	2.19462	0.438151	5.01346	5.35e-07	6.86e-06	Ern1	ERN1	desc=Serine/threonine-protein kinase/endoribonuclease IRE1 (Mus musculus)	GO:0004540,GO:0004672,GO:0005515,GO:0005524,GO:0006397,GO:0006468,GO:0016772	GO:0005737
PMZ_0043336	ttyh1	scaf_00019	5304438	5328645	839.185	1.90904	0.543293	3.5126	0.000443749	0.00225963	ttyh1	TTYH2	desc=Protein tweety homolog 1-A (Xenopus laevis)		GO:0034707
PMZ_0043341	GPRC5C	scaf_00019	6884901	6891505	3469.24	3.09989	0.506345	6.11217	9.83e-10	2.86e-08	GPRC5C	GPC5C	desc=G-protein coupled receptor family C group 5 member C (Bos taurus)	GO:0004930,GO:0007186,GO:0016021	GO:0016021
PMZ_0043343	TMC6	scaf_00019	7065677	7069624	116.089	3.28924	0.743292	4.42786	9.52e-06	8.43e-05	TMC6	TMC3	desc=Transmembrane channel-like protein 6 (Homo sapiens)		GO:0016021
PMZ_0043350	METTL9	scaf_00019	9077227	9079988	135.422	2.72666	0.74977	3.63099	0.000282341	0.00153923	METTL9	METL9	desc=Methyltransferase-like protein 9 (Gallus gallus)
PMZ_0043363	RASD2	scaf_00019	10812631	10813338	291.414	7.74761	0.830388	9.10766	8.42e-20	1.99e-17	RASD2	RHES	desc=GTP-binding protein Rhes (Homo sapiens)	GO:0005525,GO:0005622,GO:0007165,GO:0007264,GO:0015031,GO:0016020	GO:0005886
PMZ_0043397	TSPAN15	scaf_00012	2483928	2508721	458.519	3.1287	0.689715	4.54823	5.41e-06	5.18e-05	TSPAN15	TSN15	desc=Tetraspanin-15 (Bos taurus)	GO:0016021	GO:0009986
PMZ_0043404	AAK1	scaf_00012	3804272	3822444	400.873	1.08305	0.355394	3.04679	0.00231302	0.00904397	AAK1	AAK1	desc=AP2-associated protein kinase 1 (Bos taurus)	GO:0004672,GO:0005524,GO:0006468,GO:0016772	GO:0031252
PMZ_0043409	Elovl6	scaf_00012	4804891	4826281	946.013	1.91416	0.529871	3.62502	0.00028894	0.00156909	Elovl6	ELOV6	desc=Elongation of very long chain fatty acids protein 6 (Mus musculus)	GO:0016021	GO:0005783
PMZ_0043415	Pdlim3	scaf_00012	6838015	6845691	93.8356	1.98948	0.508855	3.91552	9.02e-05	0.000584898	Pdlim3	PDLI3	desc=PDZ and LIM domain protein 3 (Mus musculus)	GO:0005515	GO:0015629
PMZ_0043428	TM9SF3	scaf_00012	10569908	10632252	6748.4	2.97123	0.582549	5.10062	3.39e-07	4.66e-06	TM9SF3	TM9S3	desc=Transmembrane 9 superfamily member 3 (Homo sapiens)	GO:0016021	GO:0016021
PMZ_0043429	zcchc7	scaf_00012	10743629	10785174	143.598	1.58679	0.398227	3.98387	6.78e-05	0.000456183	zcchc7	ZCHC7	desc=Zinc finger CCHC domain-containing protein 7 (Xenopus laevis)	GO:0003676,GO:0008270	GO:0005730
PMZ_0043443		scaf_00012	12972213	12973391	666.005	1.89154	0.55982	3.37591	0.000735712	0.00348396
PMZ_0043444	Lin54	scaf_00012	12978368	12990470	1095.17	1.70743	0.377862	4.51763	6.25e-06	5.87e-05	Lin54	LIN54	desc=Protein lin-54 homolog (Rattus norvegicus)		GO:0005634
PMZ_0043449	Ecd	scaf_00012	13546447	13565750	486.436	0.935089	0.307418	3.04002	0.00236562	0.00921624	Ecd	ECD	desc=Protein SGT1 homolog (Mus musculus)
PMZ_0043455	CDH23	scaf_00012	15873748	15912977	98.8233	2.44495	0.811372	3.01453	0.00257381	0.00989439	CDH23	CAD23	desc=Cadherin-23 (Homo sapiens)	GO:0005509,GO:0005886,GO:0007155,GO:0007156,GO:0016020	GO:0016021
PMZ_0043459	opn4a	scaf_00012	16210316	16252736	540.844	2.35943	0.572761	4.10847	3.98e-05	0.000290199	opn4a	OPN4A	desc=Melanopsin-A (Danio rerio)	GO:0004930,GO:0007186,GO:0016021	GO:0016021
PMZ_0043461	Ptplb	scaf_00035	91422	102770	117.728	3.49151	0.898757	3.88227	0.000103486	0.000656931	Ptplb		desc=Very-long-chain (3R)-3-hydroxyacyl-CoA dehydratase 2 (Mus musculus)
PMZ_0043465	Ntsr1	scaf_00035	323564	324688	20.2114	5.63409	1.24448	4.32779	1.51e-05	0.000125244	Ntsr1		desc=Neurotensin receptor type 1 (Rattus norvegicus)	GO:0004930,GO:0007186,GO:0016021
PMZ_0043480	Agr3	scaf_00035	1515018	1520909	1726.64	2.0401	0.515483	3.96687	7.28e-05	0.000485952	Agr3		desc=Anterior gradient protein 3 homolog (Mus musculus)
PMZ_0043518	SNX11	scaf_00035	7372158	7381652	189.247	3.37177	0.632343	5.32602	1e-07	1.66e-06	SNX11		desc=Sorting nexin-11 (Bos taurus)	GO:0006886,GO:0035091
PMZ_0043520	NFE2L1	scaf_00035	7456479	7475106	553.48	1.3814	0.453749	3.04049	0.00236196	0.00920382	NFE2L1		desc=Nuclear factor erythroid 2-related factor 1 (Gallus gallus)	GO:0003677,GO:0003700,GO:0005634,GO:0006355,GO:0034599,GO:0043565,GO:0045944
PMZ_0043522	wdr37	scaf_00035	7829423	7835833	475.613	2.95621	0.585572	5.04571	4.52e-07	5.97e-06	wdr37		desc=WD repeat-containing protein 37 (Xenopus tropicalis)	GO:0005515
PMZ_0043526	ttc25	scaf_00035	8730458	8764910	18032.5	2.42433	0.535837	4.52042	6.17e-06	5.8e-05	ttc25		desc=Tetratricopeptide repeat protein 25 (Xenopus laevis)	GO:0005515
PMZ_0043530	AAMP	scaf_00035	9023837	9033877	454.577	1.67533	0.48631	3.44601	0.000568933	0.00279644	AAMP		desc=Angio-associated migratory cell protein (Canis familiaris)	GO:0005515
PMZ_0043538	CIR1	scaf_00035	10132615	10141108	954.613	1.71778	0.381036	4.50933	6.5e-06	6.07e-05	CIR1		desc=Corepressor interacting with RBPJ 1 (Homo sapiens)
PMZ_0043545	Grb10	scaf_00035	10484759	10504098	68.6873	3.64619	0.791079	4.59957	4.23e-06	4.19e-05	Grb10		desc=Growth factor receptor-bound protein 10 (Sus scrofa)
PMZ_0043546	GRB14	scaf_00035	10504725	10535313	2935.53	3.48346	0.649943	5.37098	7.83e-08	1.33e-06	GRB14		desc=Growth factor receptor-bound protein 14 (Bos taurus)	GO:0007165
PMZ_0043552	ATIC	scaf_00035	11008658	11024548	2105.93	2.84853	0.670491	4.24384	2.2e-05	0.000174216	ATIC		desc=Bifunctional purine biosynthesis protein PURH (Gallus gallus)	GO:0003824,GO:0003937,GO:0004643,GO:0006164
PMZ_0043564	ccz1	scaf_00027	207738	218669	1660.69	3.06236	0.612302	5.00403	5.61e-07	7.14e-06	ccz1		desc=Vacuolar fusion protein CCZ1 homolog (Xenopus tropicalis)
PMZ_0043570	CRBN	scaf_00027	703170	723970	496.225	1.27319	0.390856	3.25875	0.00111903	0.00494478	CRBN		desc=Protein cereblon (Gallus gallus)	GO:0004176,GO:0006508
PMZ_0043589	Eefsec	scaf_00027	5359157	5362740	102.114	2.7188	0.529488	5.12616	2.96e-07	4.17e-06	Eefsec		desc=Selenocysteine-specific elongation factor (Mus musculus)	GO:0003924,GO:0005525
PMZ_0043597	TEX264	scaf_00027	6950886	6963505	88.5509	2.31346	0.631707	3.65409	0.000258093	0.00142915	TEX264		desc=Testis-expressed sequence 264 protein (Homo sapiens)
PMZ_0043600	Edem1	scaf_00027	7545233	7570310	512.976	1.93491	0.517328	3.73748	0.000185872	0.00108033	Edem1		desc=ER degradation-enhancing alpha-mannosidase-like protein 1 (Mus musculus)	GO:0004571,GO:0005509,GO:0016020
PMZ_0043624	Fam58a	scaf_00027	11050046	11056197	918.583	2.69645	0.614944	4.38895	1.14e-05	9.84e-05	Fam58a		desc=Cyclin-related protein FAM58A (Rattus norvegicus)	GO:0000079,GO:0006355,GO:0019901
PMZ_0043625	Cadps	scaf_00027	11555406	11571028	3.88857	4.40808	1.36338	3.15825	0.00158718	0.00664176	Cadps		desc=Calcium-dependent secretion activator 1 (Rattus norvegicus)
PMZ_0043641		scaf_00027	13349895	13352049	84.6076	5.20353	0.937365	5.48524	4.13e-08	7.6e-07			Note=Protein of unknown function
PMZ_0043645		scaf_00027	13616448	13619330	98.2989	2.74253	0.650911	4.20736	2.58e-05	0.000200591
PMZ_0043654	Trappc9	scaf_00017	313420	324980	812.726	1.86339	0.539776	3.44749	0.000565812	0.00278251	Trappc9	TPPC9	desc=Trafficking protein particle complex subunit 9 (Mus musculus)		GO:0005783
PMZ_0043667	Garem	scaf_00017	1183857	1189161	11.6068	3.24964	0.989591	3.23315	0.00122434	0.00534806	Garem	GARE1	desc=GRB2-associated and regulator of MAPK protein (Mus musculus)
PMZ_0043679	impad1	scaf_00017	2582764	2609726	3002.53	1.68292	0.519081	3.24049	0.00119323	0.00522628	impad1	ARHL2/IMPA3	desc=Inositol monophosphatase 3 (Xenopus laevis)	GO:0046854	GO:0016021
PMZ_0043702	KCNB1	scaf_00017	5537259	5540374	8.7053	4.15378	1.28541	3.08582	0.00202992	0.00813517	KCNB1	KCNB1	desc=Potassium voltage-gated channel subfamily B member 1 (Oryctolagus cuniculus)	GO:0005249,GO:0005515,GO:0006813,GO:0008076,GO:0051260	GO:0008076
PMZ_0043716	Ppdpf	scaf_00017	7149149	7155944	27.2121	3.18206	1.03265	3.06105	0.00220564	0.00870743	Ppdpf	PPDPF	desc=Pancreatic progenitor cell differentiation and proliferation factor (Rattus norvegicus)	GO:0007275,GO:0030154	GO:0030154
PMZ_0043719		scaf_00017	8908230	8915142	160.403	3.75209	0.480087	7.80563	5.92e-15	5.78e-13		MPI1B		GO:0000087,GO:0004725,GO:0005622,GO:0006470	GO:0005622
PMZ_0043736		scaf_00017	14474021	14491265	3557.04	3.34925	0.953562	3.52322	0.000426345	0.00217883		TRY1	Note=Similar to Trypsin (Xenopus laevis)	GO:0004252,GO:0006508	GO:0005615
PMZ_0043745	XKR6	scaf_00017	15415841	15420751	38.1188	3.05404	0.773254	3.93967	8.16e-05	0.000536004	XKR6	XKR6	desc=XK-related protein 6 (Homo sapiens)		GO:0016021
PMZ_0043746	XKR6	scaf_00017	15492836	15498123	53.7022	3.19502	0.871266	3.65863	0.000253569	0.00140811	XKR6	XKR6	desc=XK-related protein 6 (Homo sapiens)		GO:0016021
PMZ_0043749	Gtf3c4	scaf_00020	322210	337096	629.557	1.76373	0.472514	3.73937	0.000184485	0.00107419	Gtf3c4	TF3C4	desc=General transcription factor 3C polypeptide 4 (Mus musculus)		GO:0000127
PMZ_0043751		scaf_00020	529984	539024	374.261	1.39495	0.450887	3.09345	0.00197847	0.00796844		CQ059	Note=Similar to Uncharacterized protein C17orf59 homolog (Rattus norvegicus)
PMZ_0043756	apex1	scaf_00020	751789	758357	1402.31	1.61069	0.500695	3.22054	0.00127947	0.00554647	apex1	APEX1	desc=DNA-(apurinic or apyrimidinic site) lyase (Danio rerio)	GO:0003677,GO:0004518,GO:0004519,GO:0005622,GO:0006281	GO:0005783
PMZ_0043770	GGA3	scaf_00020	3133583	3139171	182.845	1.85082	0.480392	3.8509	0.000117685	0.000734113	GGA3	GGA3	desc=ADP-ribosylation factor-binding protein GGA3 (Homo sapiens)	GO:0005802,GO:0006886,GO:0016192,GO:0030131,GO:0030306	GO:0030131
PMZ_0043771	med10	scaf_00020	3403490	3430536	1242.87	1.51503	0.418446	3.62336	0.0002908	0.00157788	med10	MED10	desc=Mediator of RNA polymerase II transcription subunit 10 (Danio rerio)	GO:0001104,GO:0006357,GO:0016592	GO:0016592
PMZ_0043776	PDP1	scaf_00020	3592948	3602889	990.578	4.05323	0.550279	7.36121	1.82e-13	1.38e-11	PDP1	PDP1	desc=[Pyruvate dehydrogenase [acetyl-transferring]]-phosphatase 1%2C mitochondrial (Homo sapiens)	GO:0003824,GO:0004722,GO:0006470	GO:0005759
PMZ_0043793	Kdsr	scaf_00020	7567410	7595144	397.335	1.92364	0.475904	4.04594	5.21e-05	0.000364921	Kdsr	KDSR	desc=3-ketodihydrosphingosine reductase (Mus musculus)	GO:0008152,GO:0016491	GO:0005789
PMZ_0043798	Fam65b	scaf_00020	7965129	8005333	297.633	3.41476	0.55621	6.1415	8.17e-10	2.43e-08	Fam65b	FA65B	desc=Protein FAM65B (Mus musculus)
PMZ_0043803	EXOSC4	scaf_00020	9745454	9748598	1242.78	2.45038	0.489548	5.00804	5.5e-07	7.02e-06	EXOSC4	EXOS4	desc=Exosome complex component RRP41 (Bos taurus)		GO:0005737
PMZ_0043808	PDRG1	scaf_00020	11932342	11944211	347.007	1.9792	0.541065	3.65704	0.00025514	0.00141603	PDRG1	PDRG1	desc=p53 and DNA damage-regulated protein 1 (Bos taurus)		GO:0005737
PMZ_0043817	gbp	scaf_00020	13531650	13532075	139.387	2.17209	0.555026	3.92366	8.72e-05	0.000568372	gbp	GBP	desc=GSK-3-binding protein (Xenopus laevis)		GO:0007275
PMZ_0043825	esrp2	scaf_00020	13828707	13832068	130.588	4.1749	0.782416	5.32372	1.02e-07	1.67e-06	esrp2	ESRP2	desc=Epithelial splicing regulatory protein 2 (Danio rerio)	GO:0003676
PMZ_0043834	cnot10	scaf_00020	14494829	14520683	1887.6	1.28937	0.364603	3.53736	0.00040415	0.00208738	cnot10	CNO10	desc=CCR4-NOT transcription complex subunit 10 (Danio rerio)	GO:0005515	GO:0030014
PMZ_0043837	SLC35A2	scaf_00023	261775	275361	269.106	1.7161	0.39222	4.37502	1.21e-05	0.000103607	SLC35A2	S35A3	desc=UDP-galactose translocator (Bos taurus)	GO:0000139,GO:0005338,GO:0005351,GO:0008643,GO:0015780,GO:0016021	GO:0000139
PMZ_0043840	LRRC2	scaf_00023	446297	473242	1096.24	4.26271	0.78562	5.43036	5.62e-08	9.96e-07	LRRC2	LRRC2	desc=Leucine-rich repeat-containing protein 2 (Homo sapiens)	GO:0005515
PMZ_0043875	depdc1a	scaf_00023	4853252	4877211	368.075	1.77067	0.44386	3.99145	6.57e-05	0.000444472	depdc1a	DEP1A	desc=DEP domain-containing protein 1A (Xenopus laevis)	GO:0035556	GO:0005622
PMZ_0043898	RAB3C	scaf_00023	7242625	7267384	1392.41	4.80351	0.582856	8.2485	1.6e-16	2.29e-14	RAB3C	RAB3C	desc=Ras-related protein Rab-3C (Bos taurus)	GO:0005525,GO:0005622,GO:0007165,GO:0007264,GO:0015031,GO:0016020	GO:0048471
PMZ_0043902	TMEM38A	scaf_00023	7896083	7920067	424.546	1.87439	0.485938	3.8508	0.000117733	0.000734175	TMEM38A	TM38A	desc=Trimeric intracellular cation channel type A (Bos taurus)	GO:0005261,GO:0015672,GO:0016020	GO:0016021
PMZ_0043918		scaf_00023	10999036	11004426	308.678	1.21111	0.390238	3.1025	0.00191893	0.00777348		CS052
PMZ_0043920	Kcnv2	scaf_00023	11057402	11065914	45.8444	4.58413	0.759516	5.97068	2.36e-09	6.19e-08	Kcnv2	KCNV2	desc=Potassium voltage-gated channel subfamily V member 2 (Mus musculus)	GO:0005216,GO:0005249,GO:0005515,GO:0006811,GO:0006813,GO:0008076,GO:0016020,GO:0051260,GO:0055085	GO:0008076
PMZ_0043921		scaf_00023	11071159	11087404	13014.5	5.16458	1.05764	4.8523	1.22e-06	1.41e-05		SP	Note=Similar to Histone-binding protein N1/N2 (Xenopus laevis)	GO:0005515	GO:0005737
PMZ_0043937	Rcl1	scaf_00023	12521161	12541682	2418.18	1.93183	0.382555	5.05403	4.33e-07	5.74e-06	Rcl1	RCL1	desc=RNA 3'-terminal phosphate cyclase-like protein (Mus musculus)	GO:0003824,GO:0006396	GO:0005730
PMZ_0043941	TMEM181	scaf_00023	12684507	12714795	962.87	1.89658	0.321991	5.89174	3.82e-09	9.4e-08	TMEM181	TM181	desc=Transmembrane protein 181 (Homo sapiens)		GO:0016021
PMZ_0043969	CXXC1	scaf_00022	3357457	3367650	1526.67	1.62489	0.356114	4.56223	5.06e-06	4.88e-05	CXXC1		desc=CXXC-type zinc finger protein 1 (Homo sapiens)
PMZ_0043981	FLNB	scaf_00022	4391892	4396645	279.128	2.80502	0.804913	3.48524	0.000491701	0.00246485	FLNB		desc=Filamin-B (Homo sapiens)	GO:0003779,GO:0005515,GO:0030036,GO:0030154
PMZ_0043983	IMPDH1	scaf_00022	4463707	4472246	19.0586	3.5073	0.758298	4.57588	4.74e-06	4.61e-05	IMPDH1		desc=Inosine-5'-monophosphate dehydrogenase 1 (Bos taurus)
PMZ_0043995	RAB29	scaf_00022	5705422	5722054	607.226	5.95494	0.964457	6.13991	8.26e-10	2.44e-08	RAB29		desc=Ras-related protein Rab-7L1 (Homo sapiens)	GO:0003924,GO:0005525,GO:0005794,GO:0005802,GO:0006895,GO:0007264,GO:0015031,GO:0031982,GO:0035526,GO:0051223
PMZ_0043996	Wdr45	scaf_00022	5733572	5748293	512.986	1.56536	0.453101	3.45675	0.000546722	0.00269956	Wdr45		desc=WD repeat domain phosphoinositide-interacting protein 4 (Mus musculus)	GO:0005515
PMZ_0044012	Tmcc2	scaf_00022	8885279	8917255	3731.92	2.07069	0.539436	3.83295	0.000126616	0.000780553	Tmcc2		desc=Transmembrane and coiled-coil domains protein 2 (Mus musculus)
PMZ_0044014	Gpr22	scaf_00022	9045662	9047780	75.7832	6.74697	1.25357	5.17891	2.23e-07	3.26e-06	Gpr22		desc=Probable G-protein coupled receptor 22 (Mus musculus)	GO:0004930,GO:0007186,GO:0016021
PMZ_0044021	Ip6k3	scaf_00022	9361421	9379632	207.994	2.22348	0.739367	3.02197	0.00251137	0.00968306	Ip6k3		desc=Inositol hexakisphosphate kinase 3 (Mus musculus)	GO:0008440
PMZ_0044026	agpat9	scaf_00022	9702923	9709956	196.958	1.99822	0.415066	4.81267	1.49e-06	1.69e-05	agpat9		desc=Glycerol-3-phosphate acyltransferase 3 (Xenopus laevis)	GO:0008152,GO:0016746
PMZ_0044030	b4	scaf_00022	10068906	10072592	4259.5	6.93321	0.987898	6.97574	3.04e-12	1.77e-10	b4		desc=Protein B4 (Xenopus laevis)	GO:0000786,GO:0003677,GO:0005634,GO:0006334
PMZ_0044031	Cep83	scaf_00022	10088892	10103737	4480.65	2.05527	0.630216	3.25854	0.00111988	0.0049474	Cep83		desc=Centrosomal protein of 83 kDa (Rattus norvegicus)	GO:0005814,GO:0042384,GO:0048278
PMZ_0044048	PRB2	scaf_00045	1007459	1012898	97.0301	2.11499	0.480772	4.39826	1.09e-05	9.49e-05	PRB2	CHD7	desc=Basic salivary proline-rich protein 2 (Homo sapiens)		GO:0005634
PMZ_0044060	HERPUD1	scaf_00045	1780815	1798241	112.44	1.38829	0.447484	3.10713	0.00188911	0.00766894	HERPUD1	HERP1	desc=Homocysteine-responsive endoplasmic reticulum-resident ubiquitin-like domain member 1 protein (Homo sapiens)		GO:0005789
PMZ_0044061	TMEM208	scaf_00045	1890281	1897555	652.599	1.91979	0.38644	4.96784	6.77e-07	8.38e-06	TMEM208	TM208	desc=Transmembrane protein 208 (Bos taurus)		GO:0005789
PMZ_0044078	SPIRE1	scaf_00045	3999223	4037508	561.751	1.86849	0.448989	4.15908	3.2e-05	0.000240024	SPIRE1	SPIR1/SPIR2	desc=Protein spire homolog 1 (Macaca fascicularis)	GO:0003779,GO:0016192,GO:0045010	GO:0005938
PMZ_0044081	B4GALT6	scaf_00045	4319921	4356284	240.068	1.98879	0.404144	4.92071	8.62e-07	1.04e-05	B4GALT6	B4GT6	desc=Beta-1%2C4-galactosyltransferase 6 (Homo sapiens)	GO:0005975,GO:0016757	GO:0032580
PMZ_0044094	e2f4	scaf_00045	5763289	5771661	784.962	2.14835	0.631782	3.39201	0.000693816	0.00330652	e2f4	E2F4	desc=Transcription factor E2F4 (Xenopus laevis)	GO:0003700,GO:0005667,GO:0006355,GO:0051726	GO:0005737
PMZ_0044109	RFWD3	scaf_00045	7763997	7779786	1432.6	2.33069	0.355185	6.55947	5.4e-11	2.25e-09	RFWD3	RFWD3	desc=E3 ubiquitin-protein ligase RFWD3 (Ailuropoda melanoleuca)	GO:0005515,GO:0008270	GO:0005737
PMZ_0044111	GLG1	scaf_00045	7804104	7826282	606.681	2.42052	0.657078	3.68089	0.000232426	0.00130412	GLG1	GSLG1	desc=Golgi apparatus protein 1 (Gallus gallus)	GO:0000139,GO:0016020	GO:0031012
PMZ_0044112	Glg1	scaf_00045	7826582	7847371	5164.26	1.87869	0.445239	4.21939	2.45e-05	0.000191718	Glg1	GSLG1	desc=Golgi apparatus protein 1 (Mus musculus)	GO:0000139,GO:0016020	GO:0031012
PMZ_0044114	ANO10	scaf_00045	7870433	7887059	1255.87	1.97152	0.587014	3.34763	0.000815069	0.00379409	ANO10	ANO10	desc=Anoctamin-10 (Homo sapiens)		GO:0016021
PMZ_0044128	SLC52A1	scaf_00045	8866992	8872802	1087.33	1.90362	0.487781	3.89884	9.67e-05	0.000620666	SLC52A1	RFT2/S5A3A	desc=Solute carrier family 52%2C riboflavin transporter%2C member 1 (Homo sapiens)		GO:0016021
PMZ_0044147	DDX24	scaf_00041	2491946	2503921	1064.43	2.40934	0.462496	5.21241	1.86e-07	2.81e-06	DDX24		desc=ATP-dependent RNA helicase DDX24 (Homo sapiens)	GO:0003676,GO:0005524
PMZ_0044158		scaf_00041	3423877	3436657	69.9987	2.25766	0.712882	3.17908	0.00147742	0.00627436			Note=Protein of unknown function
PMZ_0044164		scaf_00041	4016703	4018496	784.374	2.16559	0.66886	3.23822	0.00120278	0.00526335
PMZ_0044175	SAMD4A	scaf_00041	4989348	4999700	78.937	3.4557	0.590027	5.84419	5.09e-09	1.21e-07	SAMD4A		desc=Protein Smaug homolog 1 (Homo sapiens)
PMZ_0044176	paf1	scaf_00041	5043294	5056139	833.892	1.27316	0.374606	3.39723	0.000680719	0.00325474	paf1		desc=RNA polymerase II-associated factor 1 homolog (Xenopus tropicalis)
PMZ_0044180	PAX9	scaf_00041	5233409	5235648	24.2433	3.74698	1.01711	3.63451	0.000278513	0.00152183	PAX9		desc=Paired box protein Pax-9 (Homo sapiens)	GO:0003677,GO:0006355
PMZ_0044184	Mbip	scaf_00041	5655280	5664420	286.414	2.45879	0.535432	4.59239	4.38e-06	4.31e-05	Mbip		desc=MAP3K12-binding inhibitory protein 1 (Mus musculus)
PMZ_0044185	RNF103	scaf_00041	5688375	5714865	657.632	3.18796	0.570582	5.58228	2.37e-08	4.65e-07	RNF103		desc=E3 ubiquitin-protein ligase RNF103 (Homo sapiens)	GO:0005515,GO:0008270
PMZ_0044186	RMND5A	scaf_00041	5715628	5738205	2626.45	2.0777	0.473729	4.38381	1.17e-05	0.000100415	RMND5A		desc=Protein RMD5 homolog A (Homo sapiens)	GO:0005515
PMZ_0044207	SNW1	scaf_00041	9047148	9060547	3006.57	1.31912	0.374301	3.52381	0.000425391	0.00217453	SNW1		desc=SNW domain-containing protein 1 (Bos taurus)	GO:0000398,GO:0005681
PMZ_0044213	SPBC8E4.04	scaf_00041	9483039	9508733	328.773	1.50994	0.372026	4.05616	4.99e-05	0.000351351	SPBC8E4.04		desc=Uncharacterized oxidoreductase C8E4.04 (Schizosaccharomyces pombe (strain 972 / ATCC 24843))	GO:0016491,GO:0055114
PMZ_0044240	Myoz2	scaf_00044	1056380	1060866	13.6729	3.56174	1.07512	3.24566	0.00117179	0.00514628	Myoz2		desc=Myozenin-2 (Mus musculus)
PMZ_0044241	RBM22	scaf_00044	1073613	1080615	1425.97	1.89115	0.489082	3.86478	0.000111188	0.000699862	RBM22		desc=Pre-mRNA-splicing factor RBM22 (Bos taurus)
PMZ_0044255	Ndst2	scaf_00044	2363574	2397904	192.646	2.28164	0.612504	3.72129	0.000198205	0.00114213	Ndst2		desc=Bifunctional heparan sulfate N-deacetylase/N-sulfotransferase 2 (Mus musculus)	GO:0008146,GO:0015016,GO:0016787
PMZ_0044256	ndst1	scaf_00044	2435031	2436988	168.821	3.88247	0.7409	5.2218	1.77e-07	2.7e-06	ndst1		desc=Bifunctional heparan sulfate N-deacetylase/N-sulfotransferase 1 (Xenopus tropicalis)	GO:0015016,GO:0016787
PMZ_0044257	Tifa	scaf_00044	2740641	2741473	207.172	3.4226	0.55298	6.18152	6.35e-10	1.96e-08	Tifa		desc=TRAF-interacting protein with FHA domain-containing protein A (Rattus norvegicus)	GO:0005515
PMZ_0044265	MAN2B1	scaf_00044	4137376	4150518	900.052	2.22728	0.5454	4.08924	4.33e-05	0.000311946	MAN2B1		desc=Lysosomal alpha-mannosidase (Cavia porcellus)	GO:0003824,GO:0005975,GO:0006013,GO:0015923,GO:0030246
PMZ_0044269	GLUD1	scaf_00044	4934161	4965601	818.266	2.80373	0.510752	5.48855	4.05e-08	7.52e-07	GLUD1		desc=Glutamate dehydrogenase 1%2C mitochondrial (Bos taurus)	GO:0006520,GO:0016491,GO:0055114
PMZ_0044276	Grid1	scaf_00044	5987423	6026911	162.57	1.69406	0.460752	3.67844	0.000234666	0.00131442	Grid1		desc=Glutamate receptor ionotropic%2C delta-1 (Rattus norvegicus)	GO:0004970,GO:0016020
PMZ_0044279	SLC29A3	scaf_00044	6651194	6668852	375.83	1.74673	0.486196	3.595	0.000324391	0.00173017	SLC29A3		desc=Equilibrative nucleoside transporter 3 (Bos taurus)	GO:0005337,GO:0005765,GO:0006810,GO:0015858,GO:0016021
PMZ_0044285	EIF4E	scaf_00044	7515242	7532049	2531.54	1.88551	0.518889	3.63053	0.00028284	0.00154071	EIF4E		desc=Eukaryotic translation initiation factor 4E (Bos taurus)	GO:0003723,GO:0003743,GO:0005737,GO:0006413
PMZ_0044290	MSMO1	scaf_00044	7900946	7912215	2158.41	1.89027	0.580566	3.25704	0.0011258	0.00496679	MSMO1		desc=Methylsterol monooxygenase 1 (Sus scrofa)	GO:0005506,GO:0006633,GO:0016491,GO:0055114
PMZ_0044291	PPA1	scaf_00044	7995054	8004160	352.555	1.66125	0.54543	3.04655	0.00231481	0.00904915	PPA1		desc=Inorganic pyrophosphatase (Homo sapiens)	GO:0000287,GO:0004427,GO:0005737,GO:0006796
PMZ_0044318	slc44a1	scaf_00043	1675694	1685603	138.296	1.86884	0.533534	3.50077	0.000463912	0.00234613	slc44a1	CTL1	desc=Choline transporter-like protein 1 (Xenopus laevis)		GO:0016021
PMZ_0044321	Ror1	scaf_00043	3321586	3353654	392.421	3.10381	0.879527	3.53359	0.000409955	0.00211174	Ror1	ROR1	desc=Tyrosine-protein kinase transmembrane receptor ROR1 (Mus musculus)	GO:0004672,GO:0005515,GO:0005524,GO:0006468,GO:0016772	GO:0005887
PMZ_0044333	AP1M1	scaf_00043	5180026	5209934	1395.5	1.72584	0.540116	3.19661	0.00139052	0.00595216	AP1M1	AP1M1	desc=AP-1 complex subunit mu-1 (Bos taurus)	GO:0005515,GO:0006810,GO:0006886,GO:0016192,GO:0030131	GO:0030131
PMZ_0044336	ndc1	scaf_00043	5862024	5886510	519.707	1.97136	0.493823	3.98806	6.66e-05	0.000449934	ndc1	NDC1	desc=Nucleoporin NDC1 (Xenopus laevis)		GO:0031965
PMZ_0044337	Tax1bp3	scaf_00043	5931779	5935588	164.644	2.40493	0.559265	4.30203	1.69e-05	0.000139032	Tax1bp3	TX1B3	desc=Tax1-binding protein 3 (Rattus norvegicus)	GO:0005515,GO:0007266,GO:0030111	GO:0005737
PMZ_0044340	ATP6V0B	scaf_00043	6053417	6064932	345.754	1.55777	0.486441	3.20151	0.00136709	0.00586735	ATP6V0B	VATO	desc=V-type proton ATPase 21 kDa proteolipid subunit (Bos taurus)	GO:0015078,GO:0015991,GO:0033177,GO:0033179	GO:0005768
PMZ_0044343	Elavl2	scaf_00043	6273424	6301623	958.889	2.36303	0.730668	3.22393	0.00126444	0.00549235	Elavl2	ELAV2	desc=ELAV-like protein 2 (Mus musculus)	GO:0000166,GO:0003676,GO:0003723	GO:0000166
PMZ_0044345	Abca1	scaf_00043	6384822	6402857	139.561	2.45888	0.785549	3.12996	0.00174832	0.00719363	Abca1	ABCA4	desc=ATP-binding cassette sub-family A member 1 (Mus musculus)	GO:0005215,GO:0005524,GO:0005887,GO:0006810,GO:0006911,GO:0016021,GO:0016887,GO:0033344,GO:0034186,GO:0043691	GO:0005887
PMZ_0044349	LRP8	scaf_00043	6529036	6551046	15444	6.13966	0.532593	11.5336	8.94e-31	1.34e-27	LRP8	LRP8	desc=Low-density lipoprotein receptor-related protein 8 (Gallus gallus)	GO:0005509,GO:0005515	GO:0016021
PMZ_0044368	Usp1	scaf_00043	9139538	9168829	1446.39	1.78403	0.499443	3.56815	0.000359516	0.00188848	Usp1	UBP1	desc=Ubiquitin carboxyl-terminal hydrolase 1 (Mus musculus)		GO:0005634
PMZ_0044371		scaf_00043	9645909	9650623	2076.72	1.56848	0.517671	3.03275	0.00242338	0.00940353		MED28			GO:0030864
PMZ_0044372	ZYG11B	scaf_00043	9692198	9719987	1138.37	2.57254	0.590646	4.35698	1.32e-05	0.000111568	ZYG11B	ZY11B	desc=Protein zyg-11 homolog B (Homo sapiens)
PMZ_0044384	Rad17	scaf_00043	10626227	10707697	1771.37	1.15145	0.360797	3.19211	0.00141236	0.00603349	Rad17	RAD17	desc=Cell cycle checkpoint protein RAD17 (Mus musculus)	GO:0005634,GO:0006281,GO:0007049	GO:0005634
PMZ_0044386	WAS	scaf_00042	6367	26532	173.211	4.29686	0.619812	6.92245	4.44e-12	2.48e-10	WAS	WASP	desc=Wiskott-Aldrich syndrome protein (Homo sapiens)		GO:0015629
PMZ_0044387	Wasl	scaf_00042	36975	45688	97.7797	3.92573	0.7761	5.04574	4.52e-07	5.97e-06	Wasl	WASL	desc=Neural Wiskott-Aldrich syndrome protein (Rattus norvegicus)	GO:0003779,GO:0007015,GO:2000601	GO:0030478
PMZ_0044388	WAS	scaf_00042	59178	63945	700.717	4.91395	0.619469	7.92989	2.19e-15	2.35e-13	WAS	WASP	desc=Wiskott-Aldrich syndrome protein (Homo sapiens)	GO:0003779,GO:0007015,GO:2000601	GO:0005911
PMZ_0044390	ARL8A	scaf_00042	139141	166222	561.966	2.03797	0.361447	5.63997	1.7e-08	3.49e-07	ARL8A	AR8BA	desc=ADP-ribosylation factor-like protein 8A (Gallus gallus)	GO:0005525	GO:0031902
PMZ_0044396		scaf_00042	584964	599190	39.3667	3.45206	0.773526	4.44874	8.64e-06	7.73e-05
PMZ_0044408	st7	scaf_00042	3240079	3264477	233.118	1.40067	0.398727	3.51273	0.000443528	0.00225951	st7	ST7/ST7L	desc=Suppressor of tumorigenicity 7 protein homolog (Danio rerio)		GO:0016021
PMZ_0044409	St7	scaf_00042	3292435	3302142	54.0814	5.88145	0.985829	5.75267	8.78e-09	1.96e-07	St7		desc=Suppressor of tumorigenicity 7 protein (Mus musculus)
PMZ_0044419	Rbsn	scaf_00042	4257200	4264572	435.506	2.03359	0.567621	3.57674	0.000347899	0.0018354	Rbsn	RBNS5	desc=Rabenosyn-5 (Mus musculus)	GO:0046872	GO:0031901
PMZ_0044422		scaf_00042	4291544	4298113	425.279	2.15008	0.651396	3.29118	0.00099767	0.00450064
PMZ_0044424	klhdc10	scaf_00042	4375251	4386399	517.135	1.81851	0.39395	4.61372	3.96e-06	3.96e-05	klhdc10	KLD10	desc=Kelch domain-containing protein 10 (Xenopus laevis)	GO:0005515	GO:0005737
PMZ_0044425	CRELD1	scaf_00042	4390819	4400259	788.652	3.29759	0.51647	6.3865	1.7e-10	6.08e-09	CRELD1	CREL1	desc=Cysteine-rich with EGF-like domain protein 1 (Homo sapiens)	GO:0005509,GO:0005515	GO:0016021
PMZ_0044426	BYSL	scaf_00042	4434820	4440803	1251.37	1.58695	0.36966	4.29645	1.74e-05	0.000142127	BYSL	BYST	desc=Bystin (Homo sapiens)		GO:0045177
PMZ_0044433		scaf_00042	4813208	4813426	149.631	1.69194	0.505788	3.34593	0.000820076	0.003811
PMZ_0044434	IMPDH1	scaf_00042	4970212	4985150	335.696	1.59024	0.468126	3.39885	0.000676704	0.00323848	IMPDH1	IMDH1	desc=Inosine-5'-monophosphate dehydrogenase 1 (Bos taurus)	GO:0003824,GO:0055114	GO:0005737
PMZ_0044441	MKRN1	scaf_00042	5524591	5531409	1658.82	3.01165	0.586513	5.12893	2.91e-07	4.12e-06	MKRN1	MKRN1	desc=E3 ubiquitin-protein ligase makorin-1 (Macropus eugenii)	GO:0005515,GO:0008270,GO:0046872	GO:0016874
PMZ_0044446		scaf_00042	5894785	5906581	147.848	2.01673	0.524609	3.8397	0.000123186	0.000762307		CC018			GO:0016021
PMZ_0044454	Frmd4a	scaf_00042	6657717	6683806	309.818	3.24087	0.698289	4.6436	3.42e-06	3.51e-05	Frmd4a	FRM4A	desc=FERM domain-containing protein 4A (Mus musculus)		GO:0005737
PMZ_0044461	spdl1	scaf_00042	9343946	9365246	814.703	3.29226	0.567742	5.7959	6.8e-09	1.55e-07	spdl1	SPDLA	desc=Protein Spindly-A (Xenopus laevis)	GO:0031577,GO:0034501	GO:0000940
PMZ_0044465	FBXL14	scaf_00042	9855591	9866806	5630.08	3.77131	0.339883	11.0989	1.27e-28	1.45e-25	FBXL14	FXL14	desc=F-box/LRR-repeat protein 14 (Bos taurus)	GO:0005515	GO:0005737
PMZ_0044468	DNM1L	scaf_00042	10010065	10028308	382.705	1.43171	0.378602	3.77936	0.000157232	0.000936309	DNM1L	DNM1L	desc=Dynamin-1-like protein (Bos taurus)	GO:0000266,GO:0003924,GO:0005525,GO:0016559	GO:0030054
PMZ_0044470	Synpr	scaf_00042	10264411	10281388	32.4833	2.81479	0.642935	4.36733	1.26e-05	0.000106971	Synpr	SYNPR	desc=Synaptoporin (Rattus norvegicus)	GO:0005215,GO:0006810,GO:0008021,GO:0016020,GO:0048168	GO:0030054
PMZ_0044480	Ctsa	scaf_00033	387427	395782	516.446	2.38003	0.506246	4.70163	2.58e-06	2.73e-05	Ctsa	PPGB	desc=Lysosomal protective protein (Mus musculus)	GO:0004185,GO:0006508	GO:0070062
PMZ_0044481	CTSA	scaf_00033	395823	406876	299.116	2.32251	0.507434	4.57698	4.72e-06	4.6e-05	CTSA	PPGB	desc=Lysosomal protective protein (Bos taurus)	GO:0004185,GO:0006508	GO:0070062
PMZ_0044482	POP4	scaf_00033	409916	420636	2144.03	1.42682	0.413917	3.4489	0.000562871	0.00277087	POP4	RPP29	desc=Ribonuclease P protein subunit p29 (Pongo abelii)	GO:0000172,GO:0003723,GO:0004540,GO:0005655,GO:0006364,GO:0006379,GO:0008033,GO:0030677	GO:0005655
PMZ_0044483	Rprd1a	scaf_00033	425756	434799	299.18	1.51071	0.449675	3.35927	0.000781473	0.00366404	Rprd1a	RPR1B	desc=Regulation of nuclear pre-mRNA domain-containing protein 1A (Mus musculus)		GO:0016591
PMZ_0044490	nudcd1	scaf_00033	1022996	1049098	473.913	2.3754	0.483972	4.90764	9.22e-07	1.1e-05	nudcd1	NUDC1	desc=NudC domain-containing protein 1 (Xenopus tropicalis)		GO:0005737
PMZ_0044507	FBXL6	scaf_00033	1426480	1435460	852.488	1.55828	0.385281	4.04233	5.29e-05	0.0003694	FBXL6	FBXL6	desc=F-box/LRR-repeat protein 6 (Homo sapiens)
PMZ_0044526	Dtnbp1	scaf_00033	5374270	5388787	361.822	1.82791	0.568747	3.21183	0.00131893	0.00568959	Dtnbp1	DTBP1	desc=Dysbindin (Rattus norvegicus)	GO:0005737	GO:0030424
PMZ_0044527	rnmt	scaf_00033	5543742	5548627	308.677	2.12161	0.588279	3.60654	0.000310303	0.00166786	rnmt	MCES	desc=mRNA cap guanine-N7 methyltransferase (Danio rerio)		GO:0005845
PMZ_0044542	DNAJA1	scaf_00033	10607183	10617895	1171.99	1.89533	0.566904	3.3422	0.000831169	0.00385216	DNAJA1	DNJA1	desc=DnaJ homolog subfamily A member 1 (Bos taurus)	GO:0006457,GO:0051082	GO:0005829
PMZ_0044550	CEP192	scaf_00033	11492263	11518706	281.029	1.72295	0.529924	3.24677	0.00116721	0.00512851	CEP192	CE192	desc=Centrosomal protein of 192 kDa (Homo sapiens)		GO:0005814
PMZ_0044551	CEP192	scaf_00033	11537710	11620051	412.071	1.62813	0.481264	3.37979	0.000725418	0.00344025	CEP192	CE192	desc=Centrosomal protein of 192 kDa (Homo sapiens)	GO:0005813,GO:0051225,GO:0051298	GO:0005814
PMZ_0044558		scaf_00033	12051729	12068972	97.4408	2.9259	0.674789	4.33606	1.45e-05	0.0001213			Note=Protein of unknown function
PMZ_0044562	PVRL1	scaf_00030	285981	356136	1227.2	1.88687	0.468356	4.02803	5.62e-05	0.000387989	PVRL1		desc=Nectin-1 (Homo sapiens)	GO:0005515
PMZ_0044564	rbm42	scaf_00030	447373	456798	719.25	1.02759	0.320547	3.20671	0.0013426	0.00577887	rbm42		desc=RNA-binding protein 42 (Xenopus tropicalis)	GO:0000166,GO:0003676
PMZ_0044565	chek1	scaf_00030	459249	470615	832.159	1.49769	0.377057	3.96735	7.27e-05	0.000485142	chek1		desc=Serine/threonine-protein kinase Chk1 (Xenopus laevis)	GO:0004672,GO:0005524,GO:0006468,GO:0016772
PMZ_0044569	Bco2	scaf_00030	1113912	1127499	662.953	4.07513	0.790741	5.1536	2.56e-07	3.69e-06	Bco2		desc=Beta%2Cbeta-carotene 9'%2C10'-oxygenase (Mus musculus)
PMZ_0044570		scaf_00030	1131075	1147106	557.499	3.41037	0.474876	7.17763	7.09e-13	4.72e-11			Note=Protein of unknown function	GO:0005515
PMZ_0044575	UPK1B	scaf_00030	1698083	1713309	691.258	4.47797	0.798905	5.60999	2.02e-08	4.04e-07	UPK1B		desc=Uroplakin-1b (Neovison vison)	GO:0016021
PMZ_0044582	UMODL1	scaf_00030	2973413	2995562	247.285	7.94007	0.944685	8.08089	6.43e-16	7.71e-14	UMODL1		desc=Uromodulin-like 1 (Homo sapiens)	GO:0005509,GO:0005515,GO:0005576,GO:0030414
PMZ_0044597	has1	scaf_00030	4962883	4970376	1179.57	8.57499	0.89966	9.38728	6.16e-21	1.81e-18	has1		desc=Hyaluronan synthase 1 (Xenopus laevis)
PMZ_0044605	DPAGT1	scaf_00030	7489716	7501172	675.972	1.37023	0.28728	4.7706	1.84e-06	2.03e-05	DPAGT1		desc=UDP-N-acetylglucosamine--dolichyl-phosphate N-acetylglucosaminephosphotransferase (Homo sapiens)	GO:0008963,GO:0016021
PMZ_0044608		scaf_00030	8058505	8066031	23.9892	5.14379	1.08523	4.5796	4.66e-06	4.55e-05
PMZ_0044639	ESPN	scaf_00039	1147542	1185562	146.954	2.62339	0.677234	3.86945	0.000109082	0.000688633	ESPN		desc=Espin (Homo sapiens)	GO:0003779,GO:0005515
PMZ_0044640	ESPN	scaf_00039	1200595	1218825	63.6746	2.55379	0.631085	4.03487	5.46e-05	0.00037942	ESPN		desc=Espin (Homo sapiens)	GO:0003779,GO:0005515,GO:0051015,GO:0051017
PMZ_0044646	EPHB2	scaf_00039	3654341	3659449	35.1394	2.58782	0.857789	3.01809	0.00254376	0.00978661	EPHB2		desc=Ephrin type-B receptor 2 (Coturnix coturnix japonica)	GO:0048013
PMZ_0044658	Nphp4	scaf_00039	7467133	7497289	152.356	2.76843	0.615711	4.47999	7.46e-06	6.83e-05	Nphp4		desc=Nephrocystin-4 (Mus musculus)	GO:0005856,GO:0031513,GO:0090090
PMZ_0044673	Fbxo42	scaf_00039	8795799	8810573	2805.1	2.41607	0.453714	5.31992	1.04e-07	1.7e-06	Fbxo42		desc=F-box only protein 42 (Mus musculus)	GO:0005515
PMZ_0044683	Trpv5	scaf_00039	9937244	9969196	169.183	2.75757	0.62384	4.42263	9.75e-06	8.59e-05	Trpv5		desc=Transient receptor potential cation channel subfamily V member 5 (Oryctolagus cuniculus)	GO:0005216,GO:0005262,GO:0005515,GO:0006811,GO:0006816,GO:0016020,GO:0016021,GO:0055085
PMZ_0044685		scaf_00039	10044076	10059581	658.353	1.84629	0.606413	3.0372	0.00238784	0.00929347
PMZ_0044695		scaf_00034	172714	179594	621.066	7.97563	0.638786	12.3359	5.8e-35	1.41e-31
PMZ_0044696		scaf_00034	432870	464741	45.5057	1.69965	0.538299	3.15885	0.00158391	0.00663235		ARRD1			GO:0031410
PMZ_0044702	Rnf41	scaf_00034	904763	913123	456.985	1.6845	0.52701	3.19414	0.00140247	0.005993	Rnf41	RNF41	desc=E3 ubiquitin-protein ligase NRDP1 (Mus musculus)	GO:0004842,GO:0005515,GO:0008270,GO:0016567,GO:0016881,GO:0031386,GO:0046872	GO:0016881
PMZ_0044716	EPHX4	scaf_00034	2688966	2706593	1898.23	1.62773	0.406675	4.00767	6.13e-05	0.000417945	EPHX4	EPHX4	desc=Epoxide hydrolase 4 (Homo sapiens)		GO:0016021
PMZ_0044717	Suco	scaf_00034	2798014	2804648	172.218	2.80099	0.562004	4.97369	6.57e-07	8.18e-06	Suco	SUCO	desc=SUN domain-containing ossification factor (Mus musculus)		GO:0016021
PMZ_0044718	Suco	scaf_00034	2806417	2824921	457.783	3.78415	0.72757	5.18121	2.2e-07	3.24e-06	Suco	SUCO	desc=SUN domain-containing ossification factor (Mus musculus)		GO:0016021
PMZ_0044722	cdk9	scaf_00034	3455410	3462723	4167.68	1.66746	0.378805	4.40367	1.06e-05	9.28e-05	cdk9	CDK9	desc=Cyclin-dependent kinase 9 (Xenopus tropicalis)	GO:0004672,GO:0005524,GO:0006468,GO:0016772	GO:0005634
PMZ_0044723	Gtf3c5	scaf_00034	3463046	3469194	483.513	1.45064	0.4495	3.2291	0.00124179	0.00540604	Gtf3c5	TF3C5	desc=General transcription factor 3C polypeptide 5 (Mus musculus)		GO:0005654
PMZ_0044725	Ptgs1	scaf_00034	3485231	3501977	618.788	2.84905	0.9464	3.01507	0.00256917	0.00987847	Ptgs1	PGH1	desc=Prostaglandin G/H synthase 1 (Rattus norvegicus)	GO:0001516,GO:0004601,GO:0004666,GO:0006954,GO:0006979,GO:0008217,GO:0019371,GO:0020037,GO:0055114	GO:0005737
PMZ_0044726	SURF4	scaf_00034	3568574	3575003	1709.9	2.8595	0.495236	5.77464	7.71e-09	1.74e-07	SURF4	SURF4	desc=Surfeit locus protein 4 (Homo sapiens)	GO:0016021	GO:0005789
PMZ_0044727	PIP5KL1	scaf_00034	3657788	3667220	131.487	3.40991	0.724306	4.69943	2.61e-06	2.75e-05	PIP5KL1	PI5L1	desc=Phosphatidylinositol 4-phosphate 5-kinase-like protein 1 (Homo sapiens)	GO:0016307,GO:0046488	GO:0005737
PMZ_0044753	odf2	scaf_00034	10579222	10599414	503.121	1.98316	0.608404	3.25368	0.00113919	0.00501786	odf2	ODFP2	desc=Outer dense fiber protein 2 (Xenopus laevis)		GO:0005929
PMZ_0044754	Lrsam1	scaf_00034	10737731	10761012	600.958	1.40734	0.423463	3.31924	0.000902615	0.00412585	Lrsam1	LRSM1	desc=E3 ubiquitin-protein ligase LRSAM1 (Mus musculus)		GO:0005737
PMZ_0044755	Nup214	scaf_00034	10816970	10835741	582.106	1.93014	0.538358	3.5794	0.000344387	0.00181888	Nup214	NU214	desc=Nuclear pore complex protein Nup214 (Mus musculus)	GO:0005515	GO:0005829
PMZ_0044758	Naf1	scaf_00034	11104665	11142685	1510.99	1.39778	0.358276	3.90274	9.51e-05	0.000612151	Naf1	DPP2/F1	desc=H/ACA ribonucleoprotein complex non-core subunit NAF1 (Mus musculus)	GO:0001522,GO:0006508,GO:0008236,GO:0042254	GO:0005737
PMZ_0044761	MECP2	scaf_00034	11672843	11676627	2129.14	1.94935	0.3753	5.19375	2.06e-07	3.06e-06	MECP2	MECP2	desc=Methyl-CpG-binding protein 2 (Homo sapiens)	GO:0003677,GO:0005634	GO:0005737
PMZ_0044768	sigmar1	scaf_00048	1037404	1044402	1317.7	1.50474	0.489009	3.08697	0.00202209	0.00811048	sigmar1	SGMR1	desc=Sigma non-opioid intracellular receptor 1 (Danio rerio)	GO:0006869	GO:0005789
PMZ_0044780	sdf4	scaf_00048	2067887	2068399	249.032	1.91118	0.470928	4.05728	4.96e-05	0.000350184	sdf4	CAB45	desc=45 kDa calcium-binding protein (Danio rerio)		GO:0005796
PMZ_0044785		scaf_00048	2329941	2340793	101.994	2.29802	0.742503	3.09873	0.00194349	0.00785199
PMZ_0044788	CTDNEP1	scaf_00048	2453523	2470308	656.933	3.27295	0.50206	6.51646	7.2e-11	2.9e-09	CTDNEP1	CNEP1	desc=CTD nuclear envelope phosphatase 1 (Bos taurus)	GO:0005515	GO:0005737
PMZ_0044789	Elp5	scaf_00048	2472898	2480706	574.123	2.41997	0.459784	5.26078	1.43e-07	2.25e-06	Elp5	ELP5	desc=Elongator complex protein 5 (Mus musculus)	GO:0006355	GO:0005737
PMZ_0044797	ZP2	scaf_00048	3113342	3129040	19893.7	3.30636	1.02415	3.23091	0.00123399	0.00537689	ZP2	ZP2	desc=Zona pellucida sperm-binding protein 2 (Bos taurus)		GO:0005783
PMZ_0044813	Lsg1	scaf_00048	6535896	6575935	1408.31	1.82615	0.382659	4.76973	1.84e-06	2.04e-05	Lsg1	LSG1	desc=Large subunit GTPase 1 homolog (Rattus norvegicus)	GO:0005525	GO:0015030
PMZ_0044822	ANO7	scaf_00048	7157966	7162581	1000.34	4.37419	0.588238	7.43075	1.08e-13	8.49e-12	ANO7	ANO7	desc=Anoctamin-7 (Homo sapiens)		GO:0005783
PMZ_0044831	naa38	scaf_00048	7887786	7890165	223.985	1.63839	0.446821	3.66431	0.000248003	0.00138076	naa38	LSMD1	desc=N-alpha-acetyltransferase 38%2C NatC auxiliary subunit (Danio rerio)		GO:0005737
PMZ_0044848	NIPAL2	scaf_00056	1958664	1981764	1197.96	4.60883	0.975965	4.71202	2.45e-06	2.6e-05	NIPAL2		desc=NIPA-like protein 2 (Homo sapiens)	GO:0015095,GO:0015693,GO:0016021
PMZ_0044849	LAPTM4A	scaf_00056	2040899	2061656	2680.86	1.24233	0.397377	3.13104	0.00174191	0.00717335	LAPTM4A		desc=Lysosomal-associated transmembrane protein 4A (Homo sapiens)	GO:0016021
PMZ_0044866	FAM49B	scaf_00056	5350617	5385806	1383.53	1.06573	0.352437	3.02449	0.00249057	0.00961814	FAM49B		desc=Protein FAM49B (Bos taurus)	GO:0003677,GO:0003682
PMZ_0044888	Map7d1	scaf_00050	1009372	1023873	1538.74	1.77066	0.524421	3.3656	0.000763764	0.00359838	Map7d1		desc=MAP7 domain-containing protein 1 (Mus musculus)	GO:0000226,GO:0015630
PMZ_0044893	GRIK2	scaf_00050	2213595	2220747	10.881	3.99778	1.05888	3.66193	0.000250325	0.00139248	GRIK2	GRIK2	desc=Glutamate receptor ionotropic%2C kainate 2 (Homo sapiens)		GO:0030424
PMZ_0044894	Grik1	scaf_00050	2242563	2279899	36.1879	3.96507	0.895439	4.39515	1.11e-05	9.6e-05	Grik1	GRIK2	desc=Glutamate receptor ionotropic%2C kainate 1 (Mus musculus)	GO:0004970,GO:0005234,GO:0016020	GO:0030054
PMZ_0044895	GRIK2	scaf_00050	2280849	2292453	12.5715	4.59799	1.16782	3.80458	0.000142047	0.000859693	GRIK2	GRIK1/GRIK2	desc=Glutamate receptor ionotropic%2C kainate 2 (Homo sapiens)		GO:0030424
PMZ_0044898	Sft2d2	scaf_00050	2632164	2647555	260.915	1.85314	0.536604	3.45165	0.000557169	0.00274765	Sft2d2	SFT2B	desc=Vesicle transport protein SFT2B (Mus musculus)	GO:0006810,GO:0016021,GO:0016192	GO:0070062
PMZ_0044913	Scaf8	scaf_00050	4076933	4080919	116.093	2.42929	0.628752	3.85444	0.000115995	0.000725435	Scaf8	SCAF8	desc=Protein SCAF8 (Mus musculus)		GO:0016363
PMZ_0044918	DMD	scaf_00050	4493954	4540331	117.178	1.49461	0.484957	3.08254	0.00205242	0.00820166	DMD	DMD	desc=Dystrophin (Gallus gallus)		GO:0030054
PMZ_0044925	gdap2	scaf_00050	5969758	5990246	119.215	2.38389	0.525976	4.52545	6.03e-06	5.68e-05	gdap2	GDAP2	desc=Ganglioside-induced differentiation-associated protein 2 (Danio rerio)
PMZ_0044935		scaf_00050	7297296	7302469	53.0984	4.97925	0.956304	5.11751	3.1e-07	4.32e-06			Note=Protein of unknown function	GO:0005515
PMZ_0044963	espI	scaf_00053	2697065	2708101	1108.53	7.23818	0.585994	12.3131	7.71e-35	1.51e-31	espI		desc=ESX-1 secretion-associated protein EspI (Mycobacterium tuberculosis (strain CDC 1551 / Oshkosh))
PMZ_0044966	STARD3NL	scaf_00053	3191885	3217566	790.628	3.07905	0.601102	5.12321	3e-07	4.21e-06	STARD3NL	MENTO	desc=MLN64 N-terminal domain homolog (Homo sapiens)		GO:0016021
PMZ_0045005	ORMDL3	scaf_00053	6879225	6891286	1162.6	2.22242	0.387138	5.73947	9.5e-09	2.11e-07	ORMDL3	ORML3	desc=ORM1-like protein 3 (Pongo abelii)	GO:0005789,GO:0006672,GO:0016021,GO:0090156	GO:0005783
PMZ_0045008		scaf_00053	7329026	7334006	148.728	2.20815	0.61405	3.58871	0.000332315	0.00176662		ZSC29			GO:0005634
PMZ_0045010	CSPG5	scaf_00053	7517450	7553196	190.324	2.83614	0.537727	5.27997	1.29e-07	2.05e-06	CSPG5	CSPG5	desc=Chondroitin sulfate proteoglycan 5 (Homo sapiens)	GO:0005515	GO:0005789
PMZ_0045024	KTN1	scaf_00047	1979927	2017914	4638.17	1.84545	0.380404	4.84893	1.24e-06	1.43e-05	KTN1		desc=Kinectin (Gallus gallus)
PMZ_0045025	TMX1	scaf_00047	2045932	2059652	2384.27	3.49934	0.60059	5.83257	5.46e-09	1.29e-07	TMX1		desc=Thioredoxin-related transmembrane protein 1 (Bos taurus)	GO:0045454
PMZ_0045028	RTF1	scaf_00047	2517838	2526984	753.986	2.57055	0.572287	4.48827	7.18e-06	6.62e-05	RTF1		desc=RNA polymerase-associated protein RTF1 homolog (Homo sapiens)
PMZ_0045054	ALKBH6	scaf_00047	6204539	6210539	255.437	1.52385	0.432792	3.52072	0.000430374	0.00219596	ALKBH6		desc=Alpha-ketoglutarate-dependent dioxygenase alkB homolog 6 (Homo sapiens)
PMZ_0045060	RGS7	scaf_00047	6823911	6850187	169.341	1.75258	0.472771	3.70531	0.000211129	0.00120446	RGS7		desc=Regulator of G-protein signaling 7 (Bos taurus)	GO:0035556,GO:0038032
PMZ_0045101	KIF2A	scaf_00046	4232922	4245564	187.223	3.57303	0.691765	5.15607	2.52e-07	3.65e-06	KIF2A		desc=Kinesin-like protein KIF2A (Gallus gallus)
PMZ_0045104	ugcg	scaf_00046	4455589	4470329	151.541	3.55086	0.729009	4.86873	1.12e-06	1.31e-05	ugcg		desc=Ceramide glucosyltransferase-B (Xenopus laevis)	GO:0016757
PMZ_0045126		scaf_00046	7611139	7620526	516.919	3.15962	0.707938	4.46746	7.92e-06	7.17e-05			Note=Protein of unknown function
PMZ_0045143	OR7C1	scaf_00051	250937	252116	1055.73	7.95089	1.01903	7.6901	1.47e-14	1.35e-12	OR7C1	OR7C1	desc=Olfactory receptor 7C1 (Homo sapiens)	GO:0004930,GO:0007186,GO:0016021	GO:0016021
PMZ_0045154	B3gnt5	scaf_00051	1450235	1453681	477.19	3.74625	0.974047	3.8176	0.000134758	0.000822705	B3gnt5	B3GN5	desc=Lactosylceramide 1%2C3-N-acetyl-beta-D-glucosaminyltransferase (Rattus norvegicus)	GO:0006486,GO:0008378,GO:0016020	GO:0000139
PMZ_0045157	sptssb	scaf_00051	1866469	1866744	109.373	5.31017	0.725886	7.26058	3.85e-13	2.72e-11	sptssb	SPTSB	desc=Serine palmitoyltransferase small subunit B (Xenopus tropicalis)		GO:0005789
PMZ_0045167	SOX1	scaf_00051	4258518	4259231	67.3638	7.38809	1.14395	6.09998	1.06e-09	3.04e-08	SOX1	CH31/SOX2	desc=Transcription factor SOX-1 (Homo sapiens)	GO:0003700,GO:0006355,GO:0007530,GO:0048666	GO:0005829
PMZ_0045174		scaf_00051	5643797	5653036	461.721	3.2767	0.676266	4.86115	1.17e-06	1.36e-05		IL1B		GO:0005615	GO:0005615
PMZ_0045183	ERGIC3	scaf_00051	7084219	7098880	216.974	1.43487	0.379158	3.7852	0.000153584	0.000918806	ERGIC3	ERGI3	desc=Endoplasmic reticulum-Golgi intermediate compartment protein 3 (Bos taurus)		GO:0005789
PMZ_0045188	CP	scaf_00051	7785435	7788909	1523.33	3.69648	0.476348	7.77096	7.79e-15	7.42e-13	CP	HEPH/CERU	desc=Ceruloplasmin (Homo sapiens)	GO:0005507,GO:0005886,GO:0006826,GO:0006879,GO:0016491,GO:0055114	GO:0072562
PMZ_0045205	foxp4	scaf_00049	3171187	3183638	62.3986	3.21095	1.05184	3.04239	0.0023471	0.00916163	foxp4	FOXP1	desc=Forkhead box protein P4 (Xenopus laevis)		GO:0005634
PMZ_0045207	OXTR	scaf_00049	3426470	3434237	8.6055	3.80239	1.13006	3.26272	0.0011035	0.00489294	OXTR	OXYR	desc=Oxytocin receptor (Homo sapiens)	GO:0004930,GO:0007186,GO:0016021	GO:0016021
PMZ_0045212	WNT7B	scaf_00049	4331652	4338594	30.1646	5.90034	1.18946	4.80064	1.58e-06	1.78e-05	WNT7B	WNT7B	desc=Protein Wnt-7b (Homo sapiens)	GO:0005102,GO:0005576,GO:0007275,GO:0016055	GO:0005788
PMZ_0045227	G6PD	scaf_00049	6737045	6759659	1786.61	1.77546	0.356004	4.98857	6.08e-07	7.63e-06	G6PD	G6PD	desc=Glucose-6-phosphate 1-dehydrogenase (Macropus robustus)	GO:0004345,GO:0006006,GO:0050661,GO:0055114	GO:0004345
PMZ_0045229		scaf_00049	6805523	6824824	1293.73	3.11031	0.550317	5.64661	1.64e-08	3.38e-07			Note=Protein of unknown function
PMZ_0045238	USP49	scaf_00049	7188021	7196523	202.575	1.69484	0.493275	3.43322	0.000596466	0.00291188	USP49	UP44B/UBP44	desc=Ubiquitin carboxyl-terminal hydrolase 49 (Homo sapiens)	GO:0006511,GO:0008270,GO:0036459	GO:0005634
PMZ_0045246	CUZD1	scaf_00055	267041	275045	43.7084	7.42478	1.27636	5.64855	1.62e-08	3.35e-07	CUZD1	CUZD1	desc=CUB and zona pellucida-like domain-containing protein 1 (Homo sapiens)		GO:0016021
PMZ_0045267	GRK1	scaf_00055	1974957	1995827	105.83	2.87741	0.903174	3.18326	0.00145629	0.00619679	GRK1	RK	desc=Rhodopsin kinase (Homo sapiens)	GO:0004672,GO:0004703,GO:0005524,GO:0006468,GO:0007165,GO:0016772,GO:0038032	GO:0016020
PMZ_0045269	RFC4	scaf_00055	2115006	2118531	233.663	2.69038	0.849181	3.163	0.00156152	0.0065499	RFC4	RFC4	desc=Replication factor C subunit 4 (Homo sapiens)		GO:0005663
PMZ_0045277	RAP2A	scaf_00055	2571128	2584402	890.626	2.56185	0.61552	4.16321	3.14e-05	0.000236448	RAP2A	RAP2B	desc=Ras-related protein Rap-2a (Sus scrofa)	GO:0005525,GO:0005622,GO:0007165,GO:0007264,GO:0015031,GO:0016020	GO:0005829
PMZ_0045283	BAP18	scaf_00055	3159145	3189124	421.134	1.91909	0.42659	4.49838	6.85e-06	6.35e-05	BAP18	BAP18	desc=Chromatin complexes subunit BAP18 (Homo sapiens)	GO:0003677,GO:0003682	GO:0071339
PMZ_0045292	uprt	scaf_00055	4373831	4388389	619.042	2.73531	0.483528	5.65976	1.52e-08	3.17e-07	uprt	UPP	desc=Uracil phosphoribosyltransferase homolog (Danio rerio)		GO:0005737
PMZ_0045300	TCP11L1	scaf_00055	6804281	6808247	144.108	2.35876	0.624264	3.77859	0.00015772	0.000938261	TCP11L1	STXB5/T11L1	desc=T-complex protein 11-like protein 1 (Homo sapiens)		GO:0005874
PMZ_0045301	BRSK2	scaf_00055	6868306	6879499	64.2538	3.37539	0.724589	4.64582	3.39e-06	3.47e-05	BRSK2	BRSK2	desc=Serine/threonine-protein kinase BRSK2 (Homo sapiens)		GO:0005813
PMZ_0045316	PAK1IP1	scaf_00040	5543391	5566857	618.552	2.5514	0.374674	6.81046	9.73e-12	4.91e-10	PAK1IP1	PK1IP	desc=p21-activated protein kinase-interacting protein 1-like (Gallus gallus)	GO:0005515	GO:0005730
PMZ_0045320	efr3b	scaf_00040	5916999	5982427	366.126	1.87393	0.501185	3.73795	0.000185525	0.00107899	efr3b	EFR3B	desc=Protein EFR3 homolog B (Danio rerio)	GO:0005488
PMZ_0045328	SOX7	scaf_00040	6490500	6498318	150.771	3.76213	0.912709	4.11153	3.93e-05	0.000286913	SOX7	SOX15/SOX18	desc=Transcription factor SOX-7 (Homo sapiens)		GO:0005634
PMZ_0045351	FAM110B	scaf_00040	9612129	9630156	422.373	2.36332	0.420789	5.61516	1.96e-08	3.94e-07	FAM110B	F110B	desc=Protein FAM110B (Bos taurus)		GO:0005737
PMZ_0045358	SF3B6	scaf_00040	9871186	9895057	1598.36	1.18289	0.378008	3.12876	0.00175547	0.00721844	SF3B6	SF3B6	desc=Splicing factor 3B subunit 6 (Homo sapiens)	GO:0004497,GO:0005506,GO:0016705,GO:0020037,GO:0055114	GO:0005689
PMZ_0045371	Elovl4	scaf_00054	902450	907004	938.682	4.81638	0.60609	7.94675	1.91e-15	2.09e-13	Elovl4		desc=Elongation of very long chain fatty acids protein 4 (Mus musculus)	GO:0016021
PMZ_0045376	Kpna5	scaf_00054	1174169	1175123	70.5799	3.05715	0.812422	3.75416	0.000173922	0.00102004	Kpna5		desc=Importin subunit alpha-6 (Rattus norvegicus)	GO:0005488,GO:0005634,GO:0005737,GO:0006606,GO:0008565
PMZ_0045379	ZAN	scaf_00054	1258348	1281312	4447.05	4.33235	0.811249	5.3484	8.87e-08	1.49e-06	ZAN		desc=Zonadhesin (Fragment) (Oryctolagus cuniculus)
PMZ_0045380	CYYR1	scaf_00054	1315377	1327900	121.795	2.75809	0.538149	5.12372	3e-07	4.2e-06	CYYR1		desc=Cysteine and tyrosine-rich protein 1 (Homo sapiens)
PMZ_0045386	GTF2E1	scaf_00054	1562826	1573257	348.876	2.67269	0.418452	6.38678	1.69e-10	6.08e-09	GTF2E1		desc=General transcription factor IIE subunit 1 (Bos taurus)	GO:0006367,GO:0043565
PMZ_0045387	GTF2E1	scaf_00054	1586062	1600648	432.183	1.88541	0.423863	4.45	8.59e-06	7.69e-05	GTF2E1		desc=General transcription factor IIE subunit 1 (Pongo abelii)
PMZ_0045389	tmem47	scaf_00054	2028847	2037184	56.8175	4.23106	0.809336	5.1934	2.06e-07	3.07e-06	tmem47		desc=Transmembrane protein 47 (Xenopus laevis)
PMZ_0045396	Hdx	scaf_00054	2456556	2477571	399.437	2.5866	0.473934	5.45203	4.98e-08	8.96e-07	Hdx		desc=Highly divergent homeobox (Mus musculus)	GO:0003677
PMZ_0045403	DHDDS	scaf_00054	3201019	3201915	71.742	2.3619	0.631432	3.73208	0.000189905	0.00109887	DHDDS		desc=Dehydrodolichyl diphosphate syntase complex subunit DHDDS (Homo sapiens)	GO:0016765
[truncated: 309 more rows]

## Sheet: 7B_upregulatedLarvae vs female
Pmz.id	Gene.name	location	start	end	Normalised.mean.count	log.2.fold.change	std.error.for.log.2	stat	p.value	padj	Smith_gene_name	Trinotate.Gene_name	DESC_smith	Ontology_term_smith	gene_ontology_blast
PMZ_0000211	EYA4	scaf_00003	639515	669621	263.844	-2.5598	0.661475	-3.88122	0.000103934	0.000659563	EYA4	EYA1	desc=Eyes absent homolog 4 (Homo sapiens)	GO:0004725	GO:0005737
PMZ_0000231	ANGPT2	scaf_00003	393909	444848	405.15	-3.03199	0.703736	-4.30383	1.68e-05	0.000138114	ANGPT2	ANGP2	desc=Angiopoietin-2 (Sus scrofa)	GO:0001525,GO:0030971,GO:0048014	GO:0005576
PMZ_0000237	rspo2	scaf_00003	311093	327830	123.534	-5.33734	0.708603	-7.35771	1.87e-13	1.41e-11	rspo2	RSPO2	desc=R-spondin-2 (Xenopus tropicalis)		GO:0009986
PMZ_0000256	MEIG1	scaf_00010	8667436	8669825	719.679	-4.87088	0.839913	-5.82854	5.59e-09	1.31e-07	MEIG1	MEIG1	desc=Meiosis expressed gene 1 protein homolog (Homo sapiens)	GO:0005634	GO:0005634
PMZ_0000352	ncaph	scaf_00018	7515872	7611451	8581.7	-3.20658	0.39967	-8.01624	1.09e-15	1.23e-13	ncaph	CND2	desc=Condensin complex subunit 2 (Xenopus laevis)	GO:0000796,GO:0007076	GO:0000796
PMZ_0000451	MME	scaf_00039	1844002	1875210	100.365	-3.04743	0.708314	-4.29779	1.73e-05	0.000141449	MME		desc=Neprilysin (Oryctolagus cuniculus)	GO:0004222,GO:0006508,GO:0008237
PMZ_0000462	thbs1	scaf_00025	10478204	10506491	2307.61	-3.68179	0.845473	-4.35723	1.32e-05	0.000111485	thbs1	TSP1	desc=Thrombospondin-1 (Xenopus laevis)	GO:0005509,GO:0005515,GO:0005576,GO:0005615,GO:0006954,GO:0007155,GO:0008201,GO:0016525,GO:0050840	GO:0009986
PMZ_0000464	snap25a	scaf_00025	10272543	10276017	273.709	-5.52747	0.773088	-7.12987	1e-12	6.62e-11	snap25a	SN25A	desc=Synaptosomal-associated protein 25-A (Carassius auratus)	GO:0005515	GO:0030054
PMZ_0000465	Srsf5	scaf_00025	10249168	10255145	12753.1	-3.21912	0.644865	-4.99535	5.87e-07	7.39e-06	Srsf5	SRSF5	desc=Serine/arginine-rich splicing factor 5 (Mus musculus)	GO:0000166,GO:0003676	GO:0005737
PMZ_0000489	UBE2A	scaf_00026	5972193	5985061	1975.26	-3.2462	0.64886	-5.00145	5.69e-07	7.21e-06	UBE2A		desc=Ubiquitin-conjugating enzyme E2 A (Homo sapiens)
PMZ_0000492	SLC25A4	scaf_00026	6013117	6019860	78359.1	-1.67881	0.520407	-3.21971	0.00128322	0.00555898	SLC25A4		desc=ADP/ATP translocase 1 (Bos taurus)	GO:0005215,GO:0005743,GO:0006810,GO:0055085
PMZ_0000615	HNRNPM	scaf_00725	19171	27416	200.201	-3.10156	0.459147	-6.75582	1.42e-11	6.78e-10	HNRNPM	MYEF2	desc=Heterogeneous nuclear ribonucleoprotein M (Homo sapiens)	GO:0000166	GO:0005634
PMZ_0000635	GPR19	scaf_00112	33434	35885	171.831	-2.9997	0.964443	-3.02872	0.00245594	0.00949951	GPR19	GPR19	desc=Probable G-protein coupled receptor 19 (Homo sapiens)	GO:0004930,GO:0007186,GO:0016021	GO:0016021
PMZ_0000675	AK5	scaf_00034	397424	412275	16.4408	-3.7248	0.931273	-3.93556	8.3e-05	0.000543046	AK5	KAD5	desc=Adenylate kinase isoenzyme 5 (Homo sapiens)	GO:0005524,GO:0006139,GO:0019205	GO:0005737
PMZ_0000716	Tspan4	scaf_00014	8050512	8067089	268.012	-2.79435	0.652954	-4.27875	1.88e-05	0.000152118	Tspan4		desc=Tetraspanin-4 (Mus musculus)	GO:0016021
PMZ_0000721	cracr2b	scaf_00014	7924387	7933532	43.7293	-3.82497	1.21009	-3.19857	0.0013811	0.00591705	cracr2b		desc=EF-hand calcium-binding domain-containing protein 4A (Danio rerio)
PMZ_0000752		scaf_00004	20261357	20269829	17.3062	-3.5805	1.00337	-3.52553	0.000422641	0.00216362		RFIP5/RFIP2	Note=Protein of unknown function	GO:0005515	GO:0005634
PMZ_0000823	USP36	scaf_06815	150	5093	221.47	-2.90406	0.546247	-5.32451	1.01e-07	1.67e-06	USP36	UBP36	desc=Ubiquitin carboxyl-terminal hydrolase 36 (Homo sapiens)	GO:0006511,GO:0036459	GO:0005730
PMZ_0000855		scaf_00036	66767	81133	38.367	-3.76571	0.954193	-3.898	9.7e-05	0.000622408		H1/H15	Note=Similar to Histone H1 (Oncorhynchus mykiss)	GO:0000786,GO:0003677,GO:0005634,GO:0006334	GO:0070062
PMZ_0000884	GVINP1	scaf_00003	25062500	25065977	64.6363	-3.86742	0.935155	-4.13593	3.54e-05	0.000261311	GVINP1		desc=Interferon-induced very large GTPase 1 (Homo sapiens)	GO:0005525
PMZ_0000988	SFRP1	scaf_00018	8290485	8290802	86.3726	-3.16239	0.836551	-3.77468	0.000160215	0.000951151	SFRP1	SFRP5	desc=Secreted frizzled-related protein 1 (Homo sapiens)	GO:0005515	GO:0005737
PMZ_0000996	loxl2	scaf_00018	8483106	8495985	23.8128	-4.97633	1.21804	-3.92166	8.79e-05	0.000572654	loxl2	LOXL4	desc=Lysyl oxidase homolog 2 (Xenopus laevis)	GO:0005044,GO:0016020	GO:0005576
PMZ_0001121		scaf_00021	3922135	3934319	750.379	-3.98219	0.61842	-6.45497	1.08e-10	4.15e-09		USPL1	Note=Protein of unknown function	GO:0032183,GO:0070140	GO:0015030
PMZ_0001149	COL11A1	scaf_00007	12912158	13076081	371.954	-2.81636	0.832934	-3.36857	0.000755581	0.00356674	COL11A1	COBA1	desc=Collagen alpha-1(XI) chain (Homo sapiens)		GO:0005581
PMZ_0001259	RPL22	scaf_00030	3975805	3976078	251.512	-4.23647	0.767945	-5.49913	3.82e-08	7.14e-07	RPL22		desc=60S ribosomal protein L22 (Homo sapiens)	GO:0003735,GO:0005622,GO:0005840,GO:0006412
PMZ_0001289	SLA2	scaf_05487	3056	8635	5.32163	-5.26938	1.46482	-3.48025	0.00050094	0.00250551	SLA2		desc=Src-like-adapter 2 (Homo sapiens)
PMZ_0001295	MYOM1	scaf_00001	13118309	13157977	95.0261	-2.7388	0.843264	-3.20427	0.00135407	0.00581791	MYOM1	MYOM2	desc=Myomesin-1 (Homo sapiens)	GO:0005515	GO:0031430
PMZ_0001310	SLC30A1	scaf_00009	2401541	2408234	5521.95	-1.8391	0.479705	-3.84502	0.000120541	0.000749526	SLC30A1		desc=Zinc transporter 1 (Homo sapiens)	GO:0006812,GO:0008324,GO:0016021,GO:0055085
PMZ_0001487	F2rl1	scaf_00069	1806964	1808070	73.5884	-2.799	0.81053	-3.42153	0.000622709	0.0030161	F2rl1	PAR2	desc=Proteinase-activated receptor 2 (Rattus norvegicus)	GO:0004930,GO:0007186,GO:0016021	GO:0005887
PMZ_0001522	Tectb	scaf_00012	5419726	5428195	7.26744	-3.43701	0.998801	-3.35366	0.000797491	0.00372476	Tectb	TECTB	desc=Beta-tectorin (Mus musculus)		GO:0031225
PMZ_0001539	RPL37A	scaf_00028	12110715	12111927	343.807	-3.76478	0.798551	-4.69972	2.61e-06	2.74e-05	RPL37A	RL37P	desc=60S ribosomal protein L37a (Bos taurus)	GO:0003735,GO:0005622,GO:0005840,GO:0006412	GO:0005840
PMZ_0001573	IDH1	scaf_00191	168837	185021	6737.06	-1.73104	0.569021	-3.0367	0.00239181	0.00930706	IDH1	IDHC	desc=Isocitrate dehydrogenase [NADP] cytoplasmic (Pongo abelii)	GO:0000287,GO:0004450,GO:0006102,GO:0016616,GO:0051287,GO:0055114	GO:0005829
PMZ_0001602	Ccdc89	scaf_00753	9152	18578	447.816	-2.12542	0.623599	-3.41586	0.000635804	0.00307073	Ccdc89	CCD89	desc=Coiled-coil domain-containing protein 89 (Mus musculus)		GO:0005737
PMZ_0001624	WDR1	scaf_00018	9187260	9202521	267.226	-2.98527	0.873347	-3.40339	0.000665551	0.00319139	WDR1	WDR1	desc=WD repeat-containing protein 1 (Gallus gallus)	GO:0005515	GO:0005737
PMZ_0001627	NEURL1B	scaf_00018	9255960	9292563	98.4198	-3.23119	0.831894	-3.87522	0.00010653	0.000674053	NEURL1B	NEUL1	desc=E3 ubiquitin-protein ligase NEURL1B (Homo sapiens)	GO:0005515,GO:0008270	GO:0097440
[truncated: 2,713 more rows]

## Sheet: 7C_upregulatedMale
Pmz.id	Gene.name	location	start	end	Normalised.mean.count	log.2.fold.change	std.error.for.log.2	stat	p.value	padj	Smith_gene_name	Trinotate.Gene_name	DESC_smith	Ontology_term_smith	gene_ontology_blast									gene_ontology_pfam.3	gene_ontology_pfam.4
[truncated: 2,482 more rows]

[truncated: 1 more sheets: 7C_upregulated FemalevsMale]
